# Supplementary material for: MeFSAT: a curated natural product database specific to secondary metabolites of medicinal fungi
Source: RSC Adv. 2021 Jan 12;11(5):2596–607. doi: 10.1039/d0ra10322e (PMC8693784; doi:10.1039/d0ra10322e)
Supplement: RA-011-D0RA10322E-s002 [file RA-011-D0RA10322E-s002.xlsx]

## Sheet: Title Page
Electronic Supplementary Information (ESI) Tables S1-S10 for MeFSAT: A curated natural product database specific to secondary metabolites of medicinal fungi R. P. Vivek-Anantha,b,1,, Ajaya Kumar Sahooa,b,1, Kavyaa Kumaravela,1, Karthikeyan Mohanraja,c, Areejit Samala,b,* a The Institute of Mathematical Sciences (IMSc), Chennai 600113, India b Homi Bhabha National Institute (HBNI), Mumbai 400094, …

## Sheet: Table S1
Table S1. The table gives the list of 1206 research articles retrieved from PubMed using the keyword search "Medicinal fungi" OR "Medicinal mushroom". This keyword search was last performed on 3 May 2020. For each retrieved research article, we list the corresponding PubMed identifier in this table.
Serial Number	PubMed Identifiers
1	PMID:11207456
2	PMID:11989721
3	PMID:12186429
4	PMID:12211223
5	PMID:12436306
6	PMID:12557355
7	PMID:12616600
8	PMID:12639703
9	PMID:12808294
10	PMID:12858775
11	PMID:12873725
12	PMID:14519947
13	PMID:14538122
14	PMID:14582629
15	PMID:14601740
16	PMID:14656165
17	PMID:14733937
18	PMID:14734179
19	PMID:14756912
20	PMID:15063487
21	PMID:15110099
22	PMID:15205366
23	PMID:15289852
24	PMID:15320961
25	PMID:15339450
26	PMID:15339567
27	PMID:15383265
28	PMID:15458324
29	PMID:15479035
30	PMID:15647930
31	PMID:15726350
32	PMID:15781230
33	PMID:15850599
34	PMID:15898702
35	PMID:15944782
36	PMID:16039755
37	PMID:16046081
38	PMID:16108789
39	PMID:16143299
40	PMID:16169168
41	PMID:16289471
42	PMID:16327179
43	PMID:16351502
44	PMID:16389952
45	PMID:16554714
46	PMID:16574319
47	PMID:16614703
48	PMID:16636832
49	PMID:16670374
50	PMID:16819170
51	PMID:16899239
52	PMID:16908141
53	PMID:16964420
54	PMID:17016654
55	PMID:17031636
56	PMID:17089060
57	PMID:17091395
58	PMID:17103164
59	PMID:17113195
60	PMID:17205040
61	PMID:17225544
62	PMID:17516868
63	PMID:17590297
64	PMID:17604867
65	PMID:17606977
66	PMID:17624770
67	PMID:17666799
68	PMID:17666849
69	PMID:17708623
70	PMID:17849291
71	PMID:17980585
72	PMID:18175952
73	PMID:18222673
74	PMID:18239425
75	PMID:18242970
76	PMID:18266700
77	PMID:18292947
78	PMID:18313195
79	PMID:18317543
80	PMID:18341077
81	PMID:18353636
82	PMID:18360695
83	PMID:18362935
84	PMID:18379080
85	PMID:18398492
86	PMID:18406549
87	PMID:18425349
88	PMID:18481862
89	PMID:18497981
90	PMID:18528685
91	PMID:18537612
92	PMID:18545860
93	PMID:18585672
94	PMID:18587601
95	PMID:18640252
96	PMID:18644156
97	PMID:18762989
98	PMID:18778764
99	PMID:18782264
100	PMID:1883491
101	PMID:18938219
102	PMID:18946196
103	PMID:19007000
104	PMID:19010665
105	PMID:19093913
106	PMID:19123066
107	PMID:19129637
108	PMID:19131235
109	PMID:19131705
110	PMID:19147108
111	PMID:19180796
112	PMID:19194938
113	PMID:19200097
114	PMID:19228191
115	PMID:19281536
116	PMID:19284979
117	PMID:19293251
118	PMID:19393284
119	PMID:19416507
120	PMID:19430818
121	PMID:19441068
122	PMID:19475376
123	PMID:19498044
124	PMID:19501273
125	PMID:19515145
126	PMID:19527691
127	PMID:19597314
128	PMID:19636442
129	PMID:19651243
130	PMID:19763878
131	PMID:19837675
132	PMID:19838944
133	PMID:19848398
134	PMID:19861509
135	PMID:19953599
136	PMID:19966494
137	PMID:20003548
138	PMID:20024530
139	PMID:20036142
140	PMID:20077112
141	PMID:20093034
142	PMID:20107539
143	PMID:20127246
144	PMID:20132038
145	PMID:20136448
146	PMID:20224909
147	PMID:20307095
148	PMID:20355042
149	PMID:20360625
150	PMID:20433752
151	PMID:20437236
152	PMID:20467263
153	PMID:20545620
154	PMID:20574924
155	PMID:20582617
156	PMID:20607489
157	PMID:20633512
158	PMID:20681294
159	PMID:20687553
160	PMID:20694295
161	PMID:20699131
162	PMID:20708931
163	PMID:20736909
164	PMID:20739167
165	PMID:20937401
166	PMID:21042722
167	PMID:21091259
168	PMID:21093523
169	PMID:21093573
170	PMID:21129005
171	PMID:21139030
172	PMID:21147815
173	PMID:21170811
174	PMID:21179540
175	PMID:21190105
176	PMID:21204879
177	PMID:21225227
178	PMID:21228471
179	PMID:21241775
180	PMID:21277968
181	PMID:21304532
182	PMID:21373981
183	PMID:21394807
184	PMID:21512225
185	PMID:21519745
186	PMID:21540101
187	PMID:21554122
188	PMID:21628917
189	PMID:21704694
190	PMID:21770364
191	PMID:21779570
192	PMID:21788727
193	PMID:21799678
194	PMID:21801760
195	PMID:21870045
196	PMID:21888505
197	PMID:21912538
198	PMID:21916504
199	PMID:21918170
200	PMID:21929808
201	PMID:21930194
202	PMID:21941586
203	PMID:21983128
204	PMID:21998547
205	PMID:22004964
206	PMID:22010847
207	PMID:22014786
208	PMID:22033405
209	PMID:22036615
210	PMID:22038732
211	PMID:22044278
212	PMID:22126076
213	PMID:22126586
214	PMID:22135873
215	PMID:22135874
216	PMID:22135877
217	PMID:22135883
218	PMID:22135885
219	PMID:22135886
220	PMID:22135887
221	PMID:22135888
222	PMID:22135889
223	PMID:22135891
224	PMID:22135894
225	PMID:22135898
226	PMID:22135899
227	PMID:22135900
228	PMID:22135901
229	PMID:22135903
230	PMID:22135904
231	PMID:22135906
232	PMID:22164761
233	PMID:22164764
234	PMID:22164770
235	PMID:22170106
236	PMID:22178684
237	PMID:22181838
238	PMID:22181839
239	PMID:22181840
240	PMID:22181841
241	PMID:22181842
242	PMID:22181844
243	PMID:22181846
244	PMID:22189741
245	PMID:22203867
246	PMID:22204346
247	PMID:22293124
248	PMID:22324407
249	PMID:22324409
250	PMID:22324411
251	PMID:22324412
252	PMID:22324413
253	PMID:22324414
254	PMID:22327557
255	PMID:22339704
256	PMID:22339708
257	PMID:22339710
258	PMID:22342678
259	PMID:22348255
260	PMID:22350319
261	PMID:22367480
262	PMID:22429157
263	PMID:22449697
264	PMID:22464013
265	PMID:22466955
266	PMID:22486826
267	PMID:22506418
268	PMID:22506573
269	PMID:22506577
270	PMID:22506579
271	PMID:22506580
272	PMID:22519596
273	PMID:22536281
274	PMID:22564240
275	PMID:22577975
276	PMID:22577976
277	PMID:22577979
278	PMID:22577980
279	PMID:22593926
280	PMID:22624604
281	PMID:22649470
282	PMID:22717313
283	PMID:22734866
284	PMID:22735441
285	PMID:22737844
286	PMID:22739070
287	PMID:22782880
288	PMID:22783083
289	PMID:22783134
290	PMID:22806047
291	PMID:22819952
292	PMID:22840014
293	PMID:22866120
294	PMID:22870059
295	PMID:22878139
296	PMID:22915189
297	PMID:22941092
298	PMID:22956301
299	PMID:22993555
300	PMID:23007922
301	PMID:23069850
302	PMID:23104644
303	PMID:23124338
304	PMID:23205267
305	PMID:23217280
306	PMID:23270394
307	PMID:23325103
308	PMID:23332675
309	PMID:23336512
310	PMID:23339697
311	PMID:23385757
312	PMID:23408759
313	PMID:23431343
314	PMID:23442636
315	PMID:23458920
316	PMID:23459183
317	PMID:23460242
318	PMID:23468988
319	PMID:23510174
320	PMID:23510175
321	PMID:23510177
322	PMID:23510178
323	PMID:23510180
324	PMID:23510213
325	PMID:23510214
326	PMID:23510217
327	PMID:23510220
328	PMID:23510221
329	PMID:23510222
330	PMID:23510247
331	PMID:23510248
332	PMID:23510252
333	PMID:23510282
334	PMID:23510283
335	PMID:23510285
336	PMID:23510287
337	PMID:23510288
338	PMID:23510289
339	PMID:23533483
340	PMID:23557365
341	PMID:23557366
342	PMID:23557368
343	PMID:23557369
344	PMID:23557370
345	PMID:23557372
346	PMID:23570970
347	PMID:23588713
348	PMID:23598461
349	PMID:23607932
350	PMID:23618625
351	PMID:23625225
352	PMID:23658685
353	PMID:23661989
354	PMID:23662611
355	PMID:23662612
356	PMID:23662613
357	PMID:23662616
358	PMID:23662617
359	PMID:23679238
360	PMID:23688482
361	PMID:23691436
362	PMID:23713280
363	PMID:23727474
364	PMID:23731440
365	PMID:23756567
366	PMID:23769519
367	PMID:23772114
368	PMID:23796215
369	PMID:23796216
370	PMID:23796217
371	PMID:23796218
372	PMID:23796219
373	PMID:23796220
374	PMID:23796222
375	PMID:23799608
376	PMID:23803412
377	PMID:23833361
378	PMID:23840494
379	PMID:23880305
380	PMID:23956654
381	PMID:23961172
382	PMID:23983516
383	PMID:23990738
384	PMID:23991034
385	PMID:23997605
386	PMID:24012300
387	PMID:24013612
388	PMID:24015100
389	PMID:24020451
390	PMID:24033596
391	PMID:24039499
392	PMID:24049482
393	PMID:24049493
394	PMID:24049506
395	PMID:24054236
396	PMID:24173646
397	PMID:24174985
398	PMID:24180549
399	PMID:24200877
400	PMID:24262574
401	PMID:24266369
402	PMID:24266371
403	PMID:24266374
404	PMID:24266378
405	PMID:24266379
406	PMID:24292582
407	PMID:24305615
408	PMID:24311862
409	PMID:24320617
410	PMID:24348715
411	PMID:24369991
412	PMID:24426081
413	PMID:24437471
414	PMID:24444922
415	PMID:24496007
416	PMID:24498887
417	PMID:24506286
418	PMID:24528735
419	PMID:24532584
420	PMID:24592383
421	PMID:24593676
422	PMID:24604300
423	PMID:24631961
424	PMID:24654802
425	PMID:24662069
426	PMID:24667533
427	PMID:24716143
428	PMID:24716146
429	PMID:24716157
430	PMID:24718855
431	PMID:24726685
432	PMID:24731318
433	PMID:24761950
434	PMID:24789042
435	PMID:24799082
436	PMID:24803141
437	PMID:24815470
438	PMID:24856767
439	PMID:24867795
440	PMID:24870062
441	PMID:24871446
442	PMID:24872934
443	PMID:24876914
444	PMID:24917377
445	PMID:24921705
446	PMID:24935369
447	PMID:24940901
448	PMID:24940902
449	PMID:24940906
450	PMID:24940908
451	PMID:24941035
452	PMID:24941036
453	PMID:24941037
454	PMID:24941038
455	PMID:24941039
456	PMID:24941162
457	PMID:24941164
458	PMID:24941166
459	PMID:24941169
460	PMID:24941170
461	PMID:24948193
462	PMID:25017395
463	PMID:25029345
464	PMID:25053476
465	PMID:25062475
466	PMID:25071390
467	PMID:25075033
468	PMID:25076059
469	PMID:25083619
470	PMID:25085936
471	PMID:25128810
472	PMID:25133194
473	PMID:25147452
474	PMID:25159861
475	PMID:25176413
476	PMID:25179726
477	PMID:25185869
478	PMID:25197307
479	PMID:25210845
480	PMID:25239868
481	PMID:25242929
482	PMID:25271863
483	PMID:25271866
484	PMID:25271977
485	PMID:25271978
486	PMID:25271980
487	PMID:25271983
488	PMID:25271985
489	PMID:25288148
490	PMID:25310808
491	PMID:25317055
492	PMID:25330371
493	PMID:25355452
494	PMID:25379000
495	PMID:25380370
496	PMID:25401401
497	PMID:25404219
498	PMID:25404222
499	PMID:25404223
500	PMID:25404224
501	PMID:25404225
502	PMID:25404226
503	PMID:25418207
504	PMID:25431605
505	PMID:25442260
506	PMID:25457483
507	PMID:25457949
508	PMID:25521042
509	PMID:25528581
510	PMID:25541625
511	PMID:25544933
512	PMID:25565282
513	PMID:25576897
514	PMID:25582752
515	PMID:25622112
516	PMID:25633363
517	PMID:25665150
518	PMID:25676326
519	PMID:25738390
520	PMID:25743069
521	PMID:25746401
522	PMID:25746403
523	PMID:25746405
524	PMID:25746407
525	PMID:25746408
526	PMID:25746615
527	PMID:25746617
528	PMID:25746618
529	PMID:25746621
530	PMID:25746622
531	PMID:25746625
532	PMID:25751172
533	PMID:25751937
534	PMID:25757276
535	PMID:25781157
536	PMID:25781825
537	PMID:25789604
538	PMID:25794896
539	PMID:25797403
540	PMID:25799023
541	PMID:25800528
542	PMID:25842037
543	PMID:25892909
544	PMID:25906825
545	PMID:25912848
546	PMID:25920271
547	PMID:25951778
548	PMID:25954905
549	PMID:25954906
550	PMID:25954909
551	PMID:25954910
552	PMID:25954911
553	PMID:25954913
554	PMID:25954914
555	PMID:25954959
556	PMID:25954960
557	PMID:25954965
558	PMID:25954966
559	PMID:26019658
560	PMID:26056942
561	PMID:26077494
562	PMID:26082982
563	PMID:26082983
564	PMID:26082986
565	PMID:26082988
566	PMID:26098777
567	PMID:26102296
568	PMID:26150756
569	PMID:26150929
570	PMID:26155792
571	PMID:26202360
572	PMID:26219260
573	PMID:26221612
574	PMID:26244378
575	PMID:26287401
576	PMID:26292672
577	PMID:26300947
578	PMID:26307417
579	PMID:26327534
580	PMID:26349509
581	PMID:26349510
582	PMID:26349512
583	PMID:26349514
584	PMID:26349515
585	PMID:26349516
586	PMID:26363195
587	PMID:26394068
588	PMID:26411834
589	PMID:26475043
590	PMID:26505425
591	PMID:26506312
592	PMID:26508324
593	PMID:26525192
594	PMID:26559695
595	PMID:26559701
596	PMID:26559858
597	PMID:26559859
598	PMID:26559860
599	PMID:26559862
600	PMID:26559864
601	PMID:26588475
602	PMID:26598045
603	PMID:26598137
604	PMID:26603122
605	PMID:26621447
606	PMID:26656595
607	PMID:26680416
608	PMID:26717979
609	PMID:26756187
610	PMID:26756188
611	PMID:26756189
612	PMID:26756192
613	PMID:26756296
614	PMID:26756297
615	PMID:26756301
616	PMID:26799621
617	PMID:26802244
618	PMID:26853960
619	PMID:26853961
620	PMID:26853962
621	PMID:26853965
622	PMID:26854098
623	PMID:26854099
624	PMID:26854100
625	PMID:26854102
626	PMID:26854104
627	PMID:26858003
628	PMID:26870680
629	PMID:26876995
630	PMID:26892181
631	PMID:26921302
632	PMID:26929580
633	PMID:26992741
634	PMID:27020667
635	PMID:27032196
636	PMID:27033204
637	PMID:27051046
638	PMID:27066716
639	PMID:27080449
640	PMID:27093250
641	PMID:27100524
642	PMID:27115601
643	PMID:27170065
644	PMID:27196889
645	PMID:27227778
646	PMID:27228131
647	PMID:27279439
648	PMID:27279443
649	PMID:27279445
650	PMID:27279534
651	PMID:27279536
652	PMID:27279538
653	PMID:27279539
654	PMID:27343366
655	PMID:27343682
656	PMID:27356379
657	PMID:27376001
658	PMID:27391014
659	PMID:27395511
660	PMID:27428885
661	PMID:27433123
662	PMID:27433838
663	PMID:27463787
664	PMID:27469258
665	PMID:27476275
666	PMID:27481153
667	PMID:27481155
668	PMID:27481156
669	PMID:27481295
670	PMID:27481296
671	PMID:27481299
672	PMID:27481303
673	PMID:27521144
674	PMID:27536140
675	PMID:27554678
676	PMID:27555822
677	PMID:27565426
678	PMID:27565900
679	PMID:27575325
680	PMID:27575328
681	PMID:27596390
682	PMID:27604096
683	PMID:27621376
684	PMID:27638144
685	PMID:27642126
686	PMID:27647012
687	PMID:27649602
688	PMID:27649604
689	PMID:27649606
690	PMID:27649725
691	PMID:27649726
692	PMID:27649728
693	PMID:27649730
694	PMID:27649732
695	PMID:27658376
696	PMID:27667511
697	PMID:27669211
698	PMID:27706590
699	PMID:27747890
700	PMID:27775633
701	PMID:27801787
702	PMID:27809277
703	PMID:27816657
704	PMID:27840500
705	PMID:27869186
706	PMID:27892708
707	PMID:27894599
708	PMID:27910754
709	PMID:27910758
710	PMID:27910760
711	PMID:27910761
712	PMID:27910768
713	PMID:27910770
714	PMID:27910774
715	PMID:27910775
716	PMID:27910783
717	PMID:27910785
718	PMID:27910786
719	PMID:27910788
720	PMID:27910789
721	PMID:27910790
722	PMID:27910792
723	PMID:27986611
724	PMID:28004787
725	PMID:28008810
726	PMID:28008813
727	PMID:28036354
728	PMID:28070084
729	PMID:28074433
730	PMID:28076758
731	PMID:28081627
732	PMID:28094744
733	PMID:28094745
734	PMID:28094747
735	PMID:28094748
736	PMID:28094749
737	PMID:28094751
738	PMID:28094752
739	PMID:28115973
740	PMID:28117421
741	PMID:28123514
742	PMID:28124732
743	PMID:28129885
744	PMID:28167294
745	PMID:28198003
746	PMID:28219700
747	PMID:28251448
748	PMID:28264501
749	PMID:28314725
750	PMID:28322142
751	PMID:28322148
752	PMID:28322150
753	PMID:28344593
754	PMID:28347179
755	PMID:28370894
756	PMID:28420993
757	PMID:28424791
758	PMID:28429167
759	PMID:28436319
760	PMID:28436324
761	PMID:28436325
762	PMID:28436326
763	PMID:28436327
764	PMID:28535207
765	PMID:28579887
766	PMID:28598318
767	PMID:28605320
768	PMID:28605324
769	PMID:28605325
770	PMID:28605336
771	PMID:28605337
772	PMID:28605342
773	PMID:28606152
774	PMID:28608692
775	PMID:28627694
776	PMID:28630461
777	PMID:28641042
778	PMID:28688953
779	PMID:28730971
780	PMID:28741997
781	PMID:28752930
782	PMID:28758954
783	PMID:28761785
784	PMID:28781537
785	PMID:28792668
786	PMID:28798349
787	PMID:28811535
788	PMID:28820105
789	PMID:28829786
790	PMID:28839254
791	PMID:28843267
792	PMID:28845769
793	PMID:28845770
794	PMID:28845771
795	PMID:28845772
796	PMID:28847577
797	PMID:28857033
798	PMID:28859931
799	PMID:28860534
800	PMID:28869732
801	PMID:28875673
802	PMID:28875898
803	PMID:28879839
804	PMID:28879848
805	PMID:28895671
806	PMID:28901904
807	PMID:28911401
808	PMID:28919858
809	PMID:28956350
810	PMID:28956421
811	PMID:28962482
812	PMID:28994535
813	PMID:29017237
814	PMID:29046929
815	PMID:29048673
816	PMID:29052386
817	PMID:29055355
818	PMID:29090580
819	PMID:29109709
820	PMID:29125753
821	PMID:29149037
822	PMID:29155159
823	PMID:29168246
824	PMID:29199551
825	PMID:29199552
826	PMID:29199553
827	PMID:29199556
828	PMID:29199560
829	PMID:29199563
830	PMID:29199564
831	PMID:29199565
832	PMID:29199567
833	PMID:29199568
834	PMID:29199570
835	PMID:29199574
836	PMID:29199580
837	PMID:29199582
838	PMID:29199585
839	PMID:29205864
840	PMID:29234409
841	PMID:29243310
842	PMID:29256840
843	PMID:29256841
844	PMID:29256842
845	PMID:29256846
846	PMID:29261008
847	PMID:29313328
848	PMID:29345560
849	PMID:29345561
850	PMID:29345562
851	PMID:29345563
852	PMID:29345565
853	PMID:29345566
854	PMID:29371151
855	PMID:29376926
856	PMID:29379443
857	PMID:29388549
858	PMID:29417466
859	PMID:29421594
860	PMID:29424386
861	PMID:29431066
862	PMID:29431067
863	PMID:29431068
864	PMID:29431070
865	PMID:29431071
866	PMID:29432964
867	PMID:29433575
868	PMID:29458505
869	PMID:29476632
870	PMID:29486835
871	PMID:29491836
872	PMID:29495884
873	PMID:29501839
874	PMID:29509661
875	PMID:29514437
876	PMID:29526891
877	PMID:29534044
878	PMID:29545735
879	PMID:29545893
880	PMID:29549616
881	PMID:29549725
882	PMID:29566694
883	PMID:29572689
884	PMID:29594343
885	PMID:29603608
886	PMID:29604911
887	PMID:29604912
888	PMID:29604916
889	PMID:29609012
890	PMID:29618433
891	PMID:29624845
892	PMID:29632417
893	PMID:29653168
894	PMID:29655683
895	PMID:29660454
896	PMID:29679266
897	PMID:29679724
898	PMID:29683418
899	PMID:29686502
900	PMID:29691994
901	PMID:29694432
902	PMID:29715599
903	PMID:29716853
904	PMID:29717668
905	PMID:29717669
906	PMID:29717670
907	PMID:29717671
908	PMID:29717672
909	PMID:29717673
910	PMID:29723488
911	PMID:29726712
912	PMID:29738972
913	PMID:29743060
914	PMID:29749562
915	PMID:29773003
916	PMID:29773004
917	PMID:29773007
918	PMID:29773008
919	PMID:29789976
920	PMID:29805569
921	PMID:29805742
922	PMID:29844491
923	PMID:29845223
924	PMID:29852018
925	PMID:29864002
926	PMID:29867469
927	PMID:29880593
928	PMID:29888137
929	PMID:29895244
930	PMID:29900310
931	PMID:29910666
932	PMID:29946301
933	PMID:29951133
934	PMID:29953348
935	PMID:29953350
936	PMID:29953351
937	PMID:29953354
938	PMID:29953357
939	PMID:29953358
940	PMID:29953360
941	PMID:29953361
942	PMID:29953363
943	PMID:29953364
944	PMID:29953393
945	PMID:29963318
946	PMID:29969638
947	PMID:29970519
948	PMID:29971802
949	PMID:29982472
950	PMID:29998035
951	PMID:30007918
952	PMID:30008132
953	PMID:30020937
954	PMID:30055556
955	PMID:30055559
956	PMID:30073119
957	PMID:30111678
958	PMID:30123618
959	PMID:30123634
960	PMID:30123649
961	PMID:30143116
962	PMID:30145334
963	PMID:30149752
964	PMID:30151776
965	PMID:30177176
966	PMID:30182857
967	PMID:30200586
968	PMID:30225733
969	PMID:30241850
970	PMID:30263706
971	PMID:30284044
972	PMID:30297630
973	PMID:30317947
974	PMID:30317949
975	PMID:30317952
976	PMID:30317954
977	PMID:30317976
978	PMID:30317979
979	PMID:30317980
980	PMID:30317981
981	PMID:30334243
982	PMID:30341455
983	PMID:30355923
984	PMID:30375506
985	PMID:30392748
986	PMID:30392778
987	PMID:30405049
988	PMID:30450967
989	PMID:30453781
990	PMID:30470948
991	PMID:30473664
992	PMID:30488165
993	PMID:30513345
994	PMID:30521923
995	PMID:30526821
996	PMID:30542507
997	PMID:30570422
998	PMID:30577618
999	PMID:30577752
1000	PMID:30589366
1001	PMID:30593264
1002	PMID:30594983
1003	PMID:30595979
1004	PMID:30602571
1005	PMID:30606981
1006	PMID:30617909
1007	PMID:30618745
1008	PMID:30619160
1009	PMID:30626889
1010	PMID:30629799
1011	PMID:30643540
1012	PMID:30658671
1013	PMID:30668382
1014	PMID:30678319
1015	PMID:30699645
1016	PMID:30699766
1017	PMID:30699961
1018	PMID:30703899
1019	PMID:30704622
1020	PMID:30710588
1021	PMID:30716815
1022	PMID:30727085
1023	PMID:30727325
1024	PMID:30727405
1025	PMID:30731664
1026	PMID:30731867
1027	PMID:30744046
1028	PMID:30745803
1029	PMID:30769922
1030	PMID:30774502
1031	PMID:30781501
1032	PMID:30802772
1033	PMID:30806219
1034	PMID:30806221
1035	PMID:30806222
1036	PMID:30806223
1037	PMID:30806229
1038	PMID:30806231
1039	PMID:30806232
1040	PMID:30806234
1041	PMID:30806251
1042	PMID:30806252
1043	PMID:30806256
1044	PMID:30806258
1045	PMID:30806259
1046	PMID:30806265
1047	PMID:30806266
1048	PMID:30806267
1049	PMID:30806268
1050	PMID:30806270
1051	PMID:30806271
1052	PMID:30806294
1053	PMID:30806297
1054	PMID:30806298
1055	PMID:30806301
1056	PMID:30810393
1057	PMID:30828755
1058	PMID:30832255
1059	PMID:30860186
1060	PMID:30871462
1061	PMID:30900739
1062	PMID:30934760
1063	PMID:30944804
1064	PMID:30951869
1065	PMID:30964395
1066	PMID:30971444
1067	PMID:30988772
1068	PMID:30993725
1069	PMID:30997308
1070	PMID:31001977
1071	PMID:31002607
1072	PMID:31002609
1073	PMID:31002631
1074	PMID:31002632
1075	PMID:31002635
1076	PMID:31018574
1077	PMID:31030748
1078	PMID:31030750
1079	PMID:31030755
1080	PMID:31057518
1081	PMID:31100959
1082	PMID:31109134
1083	PMID:31125162
1084	PMID:31125946
1085	PMID:31130813
1086	PMID:31134090
1087	PMID:31137248
1088	PMID:31139005
1089	PMID:31146507
1090	PMID:31147217
1091	PMID:31148935
1092	PMID:31166959
1093	PMID:31212970
1094	PMID:31221945
1095	PMID:31253150
1096	PMID:31256391
1097	PMID:31275713
1098	PMID:31276724
1099	PMID:31311503
1100	PMID:31314937
1101	PMID:31342710
1102	PMID:31384700
1103	PMID:31393604
1104	PMID:31408563
1105	PMID:31413387
1106	PMID:31437163
1107	PMID:31450828
1108	PMID:31454912
1109	PMID:31454995
1110	PMID:31456761
1111	PMID:31460439
1112	PMID:31485164
1113	PMID:31488035
1114	PMID:31489456
1115	PMID:31533688
1116	PMID:31546903
1117	PMID:31551962
1118	PMID:31569709
1119	PMID:31588393
1120	PMID:31597275
1121	PMID:31611849
1122	PMID:31627254
1123	PMID:31627860
1124	PMID:31632371
1125	PMID:31640118
1126	PMID:31645125
1127	PMID:31662620
1128	PMID:31662769
1129	PMID:31676878
1130	PMID:31677144
1131	PMID:31679226
1132	PMID:31679227
1133	PMID:31679230
1134	PMID:31679231
1135	PMID:31679232
1136	PMID:31679282
1137	PMID:31679284
1138	PMID:31679286
1139	PMID:31679287
1140	PMID:31679289
1141	PMID:31679302
1142	PMID:31679303
1143	PMID:31679305
1144	PMID:31681225
1145	PMID:31683996
1146	PMID:31697749
1147	PMID:31728657
1148	PMID:31758991
1149	PMID:31766523
1150	PMID:31775117
1151	PMID:31791317
1152	PMID:31803942
1153	PMID:31826474
1154	PMID:31830457
1155	PMID:31850823
1156	PMID:31865439
1157	PMID:31883608
1158	PMID:31888059
1159	PMID:31891260
1160	PMID:31892211
1161	PMID:31900087
1162	PMID:31911173
1163	PMID:31926986
1164	PMID:31936890
1165	PMID:31947842
1166	PMID:31958883
1167	PMID:31967160
1168	PMID:31967822
1169	PMID:31978421
1170	PMID:31982530
1171	PMID:31993159
1172	PMID:31998436
1173	PMID:32003038
1174	PMID:32005849
1175	PMID:32024622
1176	PMID:32047809
1177	PMID:32054171
1178	PMID:32062196
1179	PMID:32093250
1180	PMID:32095355
1181	PMID:32096061
1182	PMID:32103052
1183	PMID:32119635
1184	PMID:32133853
1185	PMID:32140833
1186	PMID:32158252
1187	PMID:32160646
1188	PMID:32171839
1189	PMID:32188049
1190	PMID:32192356
1191	PMID:32215044
1192	PMID:32237379
1193	PMID:32237500
1194	PMID:32257880
1195	PMID:32266549
1196	PMID:32269298
1197	PMID:32271491
1198	PMID:32276907
1199	PMID:32285166
1200	PMID:32289425
1201	PMID:32289476
1202	PMID:32325508
1203	PMID:32328252
1204	PMID:32342692
1205	PMID:32351598
1206	PMID:32354059

## Sheet: Table S2
Table S2. The table gives the curated list of 253 medicinal fungi compiled from published literature. Cited references are provided in PMID, DOI and ISBN formats.
Serial Number	Medicinal Fungi Name	Family Name	Reference(s)
1	Agaricus amboinensis	Agaricaceae	ISBN:978-981-13-6381-8
2	Agaricus arvensis	Agaricaceae	PMID:30668382
3	Agaricus bisporus	Agaricaceae	PMID:30668382
4	Agaricus bitorquis	Agaricaceae	PMID:30668382
5	Agaricus blazei	Agaricaceae	PMID:30073119
6	Agaricus brasiliensis	Agaricaceae	PMID:30073119
7	Agaricus campestris	Agaricaceae	PMID:30668382
8	Agaricus subrufescens	Agaricaceae	ISBN:978-981-13-6381-8
9	Agaricus sylvaticus	Agaricaceae	PMID:30668382
10	Agrocybe chaxingu	Strophariaceae	ISBN:978-981-13-6381-8
11	Agrocybe dura	Strophariaceae	PMID:30668382
12	Albatrellus confluens	Albatrellaceae	ISBN:978-981-13-6381-8
13	Amanita caesarea	Amanitaceae	ISBN:978-981-13-6381-8
14	Amanita ovoidea	Amanitaceae	PMID:30668382
15	Amauroderma rude	Ganodermataceae	PMID:26219260
16	Amauroderma rugosum	Ganodermataceae	PMID:29431070
17	Antrodia cinnamomea	Fomitopsidaceae	PMID:16046081
18	Antrodia xantha	Fomitopsidaceae	PMID:16046081
19	Armillaria mellea	Physalacriaceae	PMID:27536140
20	Armillaria ostoyae	Physalacriaceae	ISBN:978-981-13-6381-8
21	Astraeus asiaticus	Diplocystidiaceae	PMID:29749562
22	Astraeus hygrometricus	Diplocystidiaceae	PMID:30668382
23	Astraeus odoratus	Diplocystidiaceae	ISBN:978-981-13-6381-8
24	Auricularia auricula-judae	Auriculariaceae	PMID:23510178
25	Auricularia nigricans	Auriculariaceae	PMID:30668382
26	Boletus edulis	Boletaceae	PMID:30668382
27	Boletus pinophilus	Boletaceae	ISBN:978-981-13-6381-8
28	Boletus reticulatus	Boletaceae	ISBN:978-981-13-6381-8
29	Bovista nigrescens	Agaricaceae	PMID:30668382
30	Brunneoporus malicola	Fomitopsidaceae	PMID:16046081
31	Calocybe indica	Lyophyllaceae	ISBN:978-981-13-6381-8
32	Calvatia gigantea	Agaricaceae	PMID:30668382
33	Cantharellus cibarius	Cantharellaceae	PMID:30668382
34	Cellulariella warnieri	Polyporaceae	ISBN:978-981-13-6381-8
35	Cerioporus squamosus	Polyporaceae	ISBN:978-981-13-6381-8
36	Chlorophyllum brunneum	Agaricaceae	PMID:30668382
37	Clitocybe gibba	Tricholomataceae	PMID:29199585
38	Clitopaxillus alexandri	Pseudoclitocybaceae	ISBN:978-981-13-6381-8
39	Conocybe apala	Bolbitiaceae	ISBN:978-981-13-6381-8
40	Coprinellus disseminatus	Psathyrellaceae	PMID:30668382
41	Coprinopsis cinerea	Psathyrellaceae	ISBN:978-981-13-6381-8
42	Coprinus comatus	Agaricaceae	PMID:21147815
43	Coprinus sterquilinus	Agaricaceae	PMID:30668382
44	Cordyceps militaris	Cordycipitaceae	PMID:24789042
45	Coriolopsis gallica	Polyporaceae	ISBN:978-981-13-6381-8
46	Cortinarius caperatus	Cortinariaceae	ISBN:978-981-13-6381-8
47	Craterellus cornucopioides	Cantharellaceae	ISBN:978-981-13-6381-8
48	Cryptoporus volvatus	Polyporaceae	PMID:24260198
49	Cyathus africanus	Agaricaceae	PMID:23075884
50	Cyathus gansuensis	Agaricaceae	PMID:24444922
51	Cyathus hookeri	Agaricaceae	ISBN:978-981-10-5977-3
52	Cyathus stercoreus	Agaricaceae	PMID:24444922
53	Cyclocybe aegerita	Strophariaceae	PMID:24593676
54	Cyclocybe cylindracea	Strophariaceae	ISBN:978-981-13-6381-8
55	Daedalea quercina	Fomitopsidaceae	ISBN:978-981-13-6381-8
56	Daldinia concentrica	Hypoxylaceae	PMID:30668382
57	Engleromyces goetzei	Xylariaceae	PMID:25633363
58	Entoloma lividoalbum	Entolomataceae	ISBN:978-981-13-6381-8
59	Fistulina hepatica	Fistulinaceae	ISBN:978-981-13-6381-8
60	Flammulina velutipes	Physalacriaceae	PMID:30073119
61	Flaviporus liebmannii	Meruliaceae	PMID:16046081
62	Fomes fomentarius	Polyporaceae	PMID:17624770
63	Fomitiporia robusta	Hymenochaetaceae	DOI:10.1615/IntJMedMushr.v9.i2.80
64	Fomitopsis betulina	Fomitopsidaceae	PMID:20545620
65	Fomitopsis officinalis	Fomitopsidaceae	PMID:29417466
66	Fomitopsis palustris	Fomitopsidaceae	ISBN:978-981-13-6381-8
67	Fomitopsis pinicola	Fomitopsidaceae	ISBN:978-981-13-6381-8
68	Ganoderma adspersum	Ganodermataceae	ISBN:978-981-13-6381-8
69	Ganoderma applanatum	Ganodermataceae	PMID:22783134
70	Ganoderma atrum	Ganodermataceae	PMID:30123634
71	Ganoderma australe	Ganodermataceae	ISBN:978-981-13-6381-8
72	Ganoderma capense	Ganodermataceae	ISBN:978-981-13-6381-8
73	Ganoderma carnosum	Ganodermataceae	PMID:30123634
74	Ganoderma cochlear	Ganodermataceae	ISBN:978-981-13-6381-8
75	Ganoderma gibbosum	Ganodermataceae	ISBN:978-981-13-6381-8
76	Ganoderma hainanense	Ganodermataceae	ISBN:978-981-13-6381-8
77	Ganoderma leucocontextum	Ganodermataceae	ISBN:978-981-13-6381-8
78	Ganoderma lucidum	Ganodermataceae	PMID:30668382
79	Ganoderma neojaponicum	Ganodermataceae	ISBN:978-981-13-6381-8
80	Ganoderma orbiforme	Ganodermataceae	PMID:30123634
81	Ganoderma pfeifferi	Ganodermataceae	PMID:30123634
82	Ganoderma resinaceum	Ganodermataceae	PMID:30123634
83	Ganoderma sinense	Ganodermataceae	PMID:30123634
84	Ganoderma theaecola	Ganodermataceae	PMID:28152606
85	Ganoderma tropicum	Ganodermataceae	ISBN:978-981-13-6381-8
86	Ganoderma tsugae	Ganodermataceae	PMID:30073119
87	Geastrum fimbriatum	Geastraceae	PMID:30668382
88	Geastrum saccatum	Geastraceae	PMID:30668382
89	Geastrum triplex	Geastraceae	PMID:30668382
90	Grifola frondosa	Meripilaceae	PMID:30073119
91	Grifola gargal	Meripilaceae	PMID:29261008
92	Gymnopilus areolatus	Hymenogastraceae	PMID:29749562
93	Gymnopus confluens	Omphalotaceae	ISBN:978-981-13-6381-8
94	Gymnopus fusipes	Omphalotaceae	ISBN:978-981-13-6381-8
95	Helvella lacunosa	Helvellaceae	PMID:29982472
96	Hericium coralloides	Hericiaceae	ISBN:978-981-13-6381-8
97	Hericium erinaceus	Hericiaceae	PMID:24941169
98	Hericium flagellum	Hericiaceae	PMID:29509661
99	Hydnum repandum	Hydnaceae	ISBN:978-981-13-6381-8
100	Hygrophorus chrysodon	Hygrophoraceae	ISBN:978-981-13-6381-8
101	Hymenochaete xerantica	Hymenochaetaceae	PMID:16908141
102	Hypholoma fasciculare	Hymenogastraceae	ISBN:978-981-13-6381-8
103	Hypsizygus marmoreus	Lyophyllaceae	PMID:28730971
104	Hypsizygus ulmarius	Lyophyllaceae	ISBN:978-1-4930-0803-2
105	Imleria badia	Boletaceae	ISBN:978-981-13-6381-8
106	Inonotus hispidus	Hymenochaetaceae	PMID:27428885
107	Inonotus obliquus	Hymenochaetaceae	PMID:22135888
108	Isaria cicadae	Cordycipitaceae	PMID:19475376
109	Laccaria amethystina	Hydnangiaceae	PMID:30668382
110	Laccaria vinaceoavellanea	Hydnangiaceae	ISBN:978-981-13-6381-8
111	Lactarius aurantiacus	Russulaceae	PMID:16989534
112	Lactarius deterrimus	Russulaceae	PMID:26221612
113	Lactarius flavidulus	Russulaceae	ISBN:978-981-13-6381-8
114	Lactarius hirtipes	Russulaceae	PMID:12240977
115	Laetiporus sulphureus	Fomitopsidaceae	ISBN:978-981-13-6381-8
116	Langermannia fenzlii	Agaricaceae	PMID:24940901
117	Leccinum rugosiceps	Boletaceae	PMID:32289425
118	Leccinum scabrum	Boletaceae	DOI:10.1615/IntJMedMushrooms.v7.i3.480
119	Lentinula edodes	Omphalotaceae	PMID:29345560
120	Lentinus connatus	Polyporaceae	PMID:29749562
121	Lentinus sajor-caju	Polyporaceae	PMID:30073119
122	Lentinus squarrosulus	Polyporaceae	PMID:28322147
123	Lentinus tigrinus	Polyporaceae	ISBN:978-981-13-6381-8
124	Lentinus tuber-regium	Polyporaceae	PMID:25185869
125	Lenzites betulina	Polyporaceae	ISBN:978-981-13-6381-8
126	Lepista nuda	Tricholomataceae	ISBN:978-981-13-6381-8
127	Lepista sordida	Tricholomataceae	ISBN:978-981-10-5977-3
128	Leucoagaricus americanus	Agaricaceae	DOI:10.1615/IntJMedMushr.v7.i12.140
129	Leucocalocybe mongolica		ISBN:978-981-13-6381-8
130	Leucopaxillus gentianeus	Tricholomataceae	PMID:19475376
131	Leucopaxillus giganteus	Tricholomataceae	PMID:30073119
132	Lignosus cameronensis	Polyporaceae	ISBN:978-981-13-6381-8
133	Lignosus rhinocerotis	Polyporaceae	PMID:28845770
134	Lignosus rhinocerus	Polyporaceae	PMID:26598045
135	Lignosus tigris	Polyporaceae	PMID:26598045
136	Lycoperdon utriforme	Agaricaceae	ISBN:978-981-13-6381-8
137	Lyophyllum shimeji	Lyophyllaceae	ISBN:978-981-13-6381-8
138	Macrocybe gigantea	Tricholomataceae	ISBN:978-981-13-6381-8
139	Macrocybe lobayensis	Tricholomataceae	PMID:30073119
140	Macrolepiota albuminosa	Agaricaceae	PMID:31640118
141	Macrolepiota procera	Agaricaceae	PMID:23662617
142	Marasmius oreades	Marasmiaceae	PMID:20224909
143	Metacordyceps taii	Clavicipitaceae	PMID:26155792
144	Morchella crassipe	Morchellaceae	PMID:30668382
145	Morchella deliciosa	Morchellaceae	PMID:30668382
146	Morchella esculenta	Morchellaceae	PMID:30668382
147	Morchella importuna	Morchellaceae	PMID:30263706
148	Mycena leaiana	Mycenaceae	ISBN:978-1-4930-0803-2
149	Mycoleptodonoides aitchisonii	Meruliaceae	PMID:23510177
150	Mylitta lapidescens		PMID:19475376
151	Naematelia aurantialba	Naemateliaceae	PMID:19200097
152	Omphalotus japonicus	Omphalotaceae	PMID:20545620
153	Ophiocordyceps jiangxiensis	Ophiocordycipitaceae	PMID:22782880
154	Ophiocordyceps sinensis	Ophiocordycipitaceae	PMID:19475376
155	Ophiocordyceps sobolifera	Ophiocordycipitaceae	PMID:22014786
156	Ophiocordyceps sphecocephala	Ophiocordycipitaceae	PMID:30073119
157	Panus neostrigosus	Polyporaceae	PMID:29749562
158	Paxillus involutus	Paxillaceae	ISBN:978-981-13-6381-8
159	Perenniporia fraxinea	Polyporaceae	ISBN:978-981-13-6381-8
160	Phallus impudicus	Phallaceae	ISBN:978-981-13-6381-8
161	Phallus indusiatus	Phallaceae	PMID:27647012
162	Phallus rubicundus	Phallaceae	PMID:30668382
163	Phellinus caryophylli	Hymenochaetaceae	PMID:31002632
164	Phellinus chrysoloma	Hymenochaetaceae	PMID:32479001
165	Phellinus gilvus	Hymenochaetaceae	PMID:26506312
166	Phellinus igniarius	Hymenochaetaceae	PMID:29773004
167	Phellinus mori	Hymenochaetaceae	PMID:23510285
168	Phellinus pini	Hymenochaetaceae	PMID:29963318
169	Phellinus rimosus	Hymenochaetaceae	PMID:18398492
170	Pholiota adiposa	Strophariaceae	ISBN:978-981-13-6381-8
171	Pholiota nameko	Strophariaceae	PMID:30668382
172	Pholiota spumosa	Strophariaceae	ISBN:978-981-13-6381-8
173	Phylloporia ribis	Hymenochaetaceae	PMID:26506312
174	Pleurotus australis	Pleurotaceae	DOI:10.15414/jmbfs.2017/18.7.3.254-264
175	Pleurotus citrinopileatus	Pleurotaceae	PMID:29432964
176	Pleurotus cornucopiae	Pleurotaceae	PMID:30668382
177	Pleurotus cystidiosus	Pleurotaceae	ISBN:978-981-13-6381-8
178	Pleurotus djamor	Pleurotaceae	ISBN:978-981-13-6381-8
179	Pleurotus dryinus	Pleurotaceae	PMID:30668382
180	Pleurotus eryngii	Pleurotaceae	PMID:30073119
181	Pleurotus ferulae	Pleurotaceae	DOI:10.15414/jmbfs.2017/18.7.3.254-264
182	Pleurotus flabellatus	Pleurotaceae	PMID:29749562
183	Pleurotus floridanus	Pleurotaceae	PMID:29773006
184	Pleurotus giganteus	Pleurotaceae	PMID:31533688
185	Pleurotus nebrodensis	Pleurotaceae	ISBN:978-981-13-6381-8
186	Pleurotus ostreatoroseus	Pleurotaceae	PMID:29717670
187	Pleurotus ostreatus	Pleurotaceae	PMID:30668382
188	Pleurotus pulmonarius	Pleurotaceae	PMID:30073119
189	Podaxis pistillaris	Agaricaceae	PMID:30668382
190	Polyozellus multiplex	Thelephoraceae	ISBN:978-981-13-6381-8
191	Polyporus annulatus	Polyporaceae	PMID:30123634
192	Polyporus lipsiensis	Polyporaceae	ISBN:978-981-13-6381-8
193	Polyporus umbellatus	Polyporaceae	PMID:19475376
194	Porogramme albocincta	Polyporaceae	PMID:29749562
195	Pseudoinonotus dryadeus	Hymenochaetaceae	ISBN:978-981-13-6381-8
196	Pycnoporus sanguineus	Polyporaceae	ISBN:978-981-13-6381-8
197	Rigidoporus ulmarius	Meripilaceae	PMID:16046081
198	Rugiboletus extremiorientalis	Boletaceae	PMID:24654802
199	Russula albonigra	Russulaceae	PMID:29749562
200	Russula cyanoxantha	Russulaceae	PMID:19475376
201	Russula delica	Russulaceae	PMID:29749562
202	Russula grata	Russulaceae	ISBN:978-981-13-6381-8
203	Russula paludosa	Russulaceae	PMID:17113195
204	Russula rosea	Russulaceae	PMID:27066716
205	Sanghuangporus baumii	Hymenochaetaceae	PMID:31662769
206	Sanghuangporus vaninii	Hymenochaetaceae	ISBN:978-981-10-5977-3
207	Sanghuangporus sanghuang	Hymenochaetaceae	PMID:31993039
208	Sarcodon cyrneus	Bankeraceae	PMID:24654802
209	Sarcodon glaucopus	Bankeraceae	PMID:24654802
210	Sarcodon imbricatus	Bankeraceae	PMID:24940901
211	Sarcodon laevigatus	Bankeraceae	PMID:19475376
212	Sarcodon scabrosus	Bankeraceae	PMID:24654802
213	Schizophyllum commune	Schizophyllaceae	PMID:27667511
214	Scleroderma areolatum	Sclerodermataceae	ISBN:978-981-13-6381-8
215	Shiraia bambusicola	Shiraiaceae	PMID:32289476
216	Sparassis crispa	Sparassidaceae	PMID:22135894
217	Stereum hirsutum	Stereaceae	PMID:24054236
218	Stereum ostrea	Stereaceae	PMID:29749562
219	Strobilomyces strobilaceus	Boletaceae	PMID:24940901
220	Strobilurus esculentus	Physalacriaceae	PMID:22135877
221	Stropharia rugosoannulata	Hymenogastraceae	PMID:24654802
222	Suillus flavus	Suillaceae	ISBN:978-981-13-6381-8
223	Suillus granulatus	Suillaceae	PMID:27279720
224	Suillus luteus	Suillaceae	ISBN:978-981-13-6381-8
225	Suillus placidus	Suillaceae	ISBN:978-981-13-6381-8
226	Taiwanofungus camphoratus	Polyporaceae	PMID:18778764
227	Taiwanofungus salmoneus	Polyporaceae	PMID:25380370
228	Tapinella panuoides	Tapinellaceae	ISBN:978-981-13-6381-8
229	Termitomyces clypeatus	Lyophyllaceae	ISBN:978-981-13-6381-8
230	Termitomyces eurrhizus	Lyophyllaceae	PMID:29749562
231	Termitomyces heimii	Lyophyllaceae	ISBN:978-981-13-6381-8
232	Termitomyces microcarpus	Lyophyllaceae	PMID:30668382
233	Termitomyces titanicus	Lyophyllaceae	PMID:24654802
234	Tolypocladium ophioglossoides	Ophiocordycipitaceae	DOI:10.1615/IntJMedMushr.v6.i3.40
235	Trametes hirsuta	Polyporaceae	PMID:25954910
236	Trametes polyzona	Polyporaceae	ISBN:978-981-13-6381-8
237	Trametes pubescens	Polyporaceae	PMID:30073119
238	Trametes robiniophila	Polyporaceae	PMID:30602571
239	Trametes trogii	Polyporaceae	ISBN:978-981-13-6381-8
240	Trametes versicolor	Polyporaceae	PMID:25954909
241	Tremella fuciformis	Tremellaceae	PMID:31030755
242	Tremella mesenterica	Tremellaceae	PMID:30073119
243	Tricholoma matsutake	Tricholomataceae	PMID:23510248
244	Tricholoma pardinum	Tricholomataceae	ISBN:978-981-13-6381-8
245	Tricholoma populinum	Tricholomataceae	ISBN:978-981-13-6381-8
246	Tricholomopsis rutilans	Tricholomataceae	ISBN:978-981-13-6381-8
247	Tropicoporus linteus	Hymenochaetaceae	PMID:30073119
248	Tuber melanosporum	Tuberaceae	PMID:30473664
249	Volvariella bombycina	Pluteaceae	PMID:30668382
250	Volvariella volvacea	Pluteaceae	PMID:30668382
251	Volvopluteus gloiocephalus	Pluteaceae	PMID:30668382
252	Wolfiporia cocos	Polyporaceae	PMID:19475376
253	Xylobolus subpileatus	Stereaceae	PMID:30668382

## Sheet: Table S3
Table S3. The table gives the curated list of 184 medicinal fungi for which secondary metabolite information could be compiled from published literature in MeFSAT database.
Serial Number	Medicinal Fungi Name	Family Name	Reference(s)
1	Agaricus amboinensis	Agaricaceae	ISBN:978-981-13-6381-8
2	Agaricus arvensis	Agaricaceae	PMID:30668382
3	Agaricus bisporus	Agaricaceae	PMID:30668382
4	Agaricus blazei	Agaricaceae	PMID:30073119
5	Agaricus brasiliensis	Agaricaceae	PMID:30073119
6	Agaricus campestris	Agaricaceae	PMID:30668382
7	Agaricus subrufescens	Agaricaceae	ISBN:978-981-13-6381-8
8	Agaricus sylvaticus	Agaricaceae	PMID:30668382
9	Agrocybe chaxingu	Strophariaceae	ISBN:978-981-13-6381-8
10	Albatrellus confluens	Albatrellaceae	ISBN:978-981-13-6381-8
11	Amauroderma rude	Ganodermataceae	PMID:26219260
12	Amauroderma rugosum	Ganodermataceae	PMID:29431070
13	Antrodia cinnamomea	Fomitopsidaceae	PMID:16046081
14	Armillaria mellea	Physalacriaceae	PMID:27536140
15	Armillaria ostoyae	Physalacriaceae	ISBN:978-981-13-6381-8
16	Astraeus asiaticus	Diplocystidiaceae	PMID:29749562
17	Astraeus hygrometricus	Diplocystidiaceae	PMID:30668382
18	Astraeus odoratus	Diplocystidiaceae	ISBN:978-981-13-6381-8
19	Auricularia nigricans	Auriculariaceae	PMID:30668382
20	Boletus edulis	Boletaceae	PMID:30668382
21	Calvatia gigantea	Agaricaceae	PMID:30668382
22	Cantharellus cibarius	Cantharellaceae	PMID:30668382
23	Clitopaxillus alexandri	Pseudoclitocybaceae	ISBN:978-981-13-6381-8
24	Coprinopsis cinerea	Psathyrellaceae	ISBN:978-981-13-6381-8
25	Coprinus comatus	Agaricaceae	PMID:21147815
26	Cordyceps militaris	Cordycipitaceae	PMID:24789042
27	Coriolopsis gallica	Polyporaceae	ISBN:978-981-13-6381-8
28	Craterellus cornucopioides	Cantharellaceae	ISBN:978-981-13-6381-8
29	Cryptoporus volvatus	Polyporaceae	PMID:24260198
30	Cyathus africanus	Agaricaceae	PMID:23075884
31	Cyathus gansuensis	Agaricaceae	PMID:24444922
32	Cyathus hookeri	Agaricaceae	ISBN:978-981-10-5977-3
33	Cyathus stercoreus	Agaricaceae	PMID:24444922
34	Cyclocybe aegerita	Strophariaceae	PMID:24593676
35	Cyclocybe cylindracea	Strophariaceae	ISBN:978-981-13-6381-8
36	Daedalea quercina	Fomitopsidaceae	ISBN:978-981-13-6381-8
37	Daldinia concentrica	Hypoxylaceae	PMID:30668382
38	Engleromyces goetzei	Xylariaceae	PMID:25633363
39	Fistulina hepatica	Fistulinaceae	ISBN:978-981-13-6381-8
40	Flammulina velutipes	Physalacriaceae	PMID:30073119
41	Fomes fomentarius	Polyporaceae	PMID:17624770
42	Fomitopsis betulina	Fomitopsidaceae	PMID:20545620
43	Fomitopsis officinalis	Fomitopsidaceae	PMID:29417466
44	Fomitopsis palustris	Fomitopsidaceae	ISBN:978-981-13-6381-8
45	Fomitopsis pinicola	Fomitopsidaceae	ISBN:978-981-13-6381-8
46	Ganoderma applanatum	Ganodermataceae	PMID:22783134
47	Ganoderma atrum	Ganodermataceae	PMID:30123634
48	Ganoderma australe	Ganodermataceae	ISBN:978-981-13-6381-8
49	Ganoderma capense	Ganodermataceae	ISBN:978-981-13-6381-8
50	Ganoderma carnosum	Ganodermataceae	PMID:30123634
51	Ganoderma cochlear	Ganodermataceae	ISBN:978-981-13-6381-8
52	Ganoderma gibbosum	Ganodermataceae	ISBN:978-981-13-6381-8
53	Ganoderma hainanense	Ganodermataceae	ISBN:978-981-13-6381-8
54	Ganoderma leucocontextum	Ganodermataceae	ISBN:978-981-13-6381-8
55	Ganoderma lucidum	Ganodermataceae	PMID:30668382
56	Ganoderma neojaponicum	Ganodermataceae	ISBN:978-981-13-6381-8
57	Ganoderma orbiforme	Ganodermataceae	PMID:30123634
58	Ganoderma pfeifferi	Ganodermataceae	PMID:30123634
59	Ganoderma resinaceum	Ganodermataceae	PMID:30123634
60	Ganoderma sinense	Ganodermataceae	PMID:30123634
61	Ganoderma theaecola	Ganodermataceae	PMID:28152606
62	Ganoderma tropicum	Ganodermataceae	ISBN:978-981-13-6381-8
63	Ganoderma tsugae	Ganodermataceae	PMID:30073119
64	Grifola frondosa	Meripilaceae	PMID:30073119
65	Grifola gargal	Meripilaceae	PMID:29261008
66	Gymnopus fusipes	Omphalotaceae	ISBN:978-981-13-6381-8
67	Hericium coralloides	Hericiaceae	ISBN:978-981-13-6381-8
68	Hericium erinaceus	Hericiaceae	PMID:24941169
69	Hericium flagellum	Hericiaceae	PMID:29509661
70	Hydnum repandum	Hydnaceae	ISBN:978-981-13-6381-8
71	Hygrophorus chrysodon	Hygrophoraceae	ISBN:978-981-13-6381-8
72	Hymenochaete xerantica	Hymenochaetaceae	PMID:16908141
73	Hypholoma fasciculare	Hymenogastraceae	ISBN:978-981-13-6381-8
74	Hypsizygus marmoreus	Lyophyllaceae	PMID:28730971
75	Imleria badia	Boletaceae	ISBN:978-981-13-6381-8
76	Inonotus hispidus	Hymenochaetaceae	PMID:27428885
77	Inonotus obliquus	Hymenochaetaceae	PMID:22135888
78	Isaria cicadae	Cordycipitaceae	DOI:10.1007/10_2008_26
79	Laccaria amethystina	Hydnangiaceae	PMID:30668382
80	Laccaria vinaceoavellanea	Hydnangiaceae	ISBN:978-981-13-6381-8
81	Lactarius aurantiacus	Russulaceae	PMID:16989534
82	Lactarius deterrimus	Russulaceae	PMID:26221612
83	Lactarius flavidulus	Russulaceae	ISBN:978-981-13-6381-8
84	Lactarius hirtipes	Russulaceae	PMID:12240977
85	Laetiporus sulphureus	Fomitopsidaceae	ISBN:978-981-13-6381-8
86	Langermannia fenzlii	Agaricaceae	PMID:24940901
87	Lentinula edodes	Omphalotaceae	PMID:29345560
88	Lentinus connatus	Polyporaceae	PMID:29749562
89	Lentinus sajor-caju	Polyporaceae	PMID:30073119
90	Lentinus squarrosulus	Polyporaceae	PMID:28322147
91	Lentinus tuber-regium	Polyporaceae	PMID:25185869
92	Lenzites betulina	Polyporaceae	ISBN:978-981-13-6381-8
93	Lepista nuda	Tricholomataceae	ISBN:978-981-13-6381-8
94	Lepista sordida	Tricholomataceae	ISBN:978-981-10-5977-3
95	Leucopaxillus gentianeus	Tricholomataceae	DOI:10.1007/10_2008_26
96	Leucopaxillus giganteus	Tricholomataceae	PMID:30073119
97	Lignosus rhinocerotis	Polyporaceae	PMID:28845770
98	Lignosus rhinocerus	Polyporaceae	PMID:26598045
99	Macrocybe lobayensis	Tricholomataceae	PMID:30073119
100	Macrolepiota albuminosa	Agaricaceae	PMID:31640118
101	Macrolepiota procera	Agaricaceae	PMID:23662617
102	Marasmius oreades	Marasmiaceae	PMID:20224909
103	Metacordyceps taii	Clavicipitaceae	PMID:26155792
104	Morchella deliciosa	Morchellaceae	PMID:30668382
105	Morchella esculenta	Morchellaceae	PMID:30668382
106	Morchella importuna	Morchellaceae	PMID:30263706
107	Mycena leaiana	Mycenaceae	ISBN:978-1-4930-0803-2
108	Mycoleptodonoides aitchisonii	Meruliaceae	PMID:23510177
109	Mylitta lapidescens		DOI:10.1007/10_2008_26
110	Omphalotus japonicus	Omphalotaceae	PMID:20545620
111	Ophiocordyceps jiangxiensis	Ophiocordycipitaceae	PMID:22782880
112	Ophiocordyceps sinensis	Ophiocordycipitaceae	DOI:10.1007/10_2008_26
113	Panus neostrigosus	Polyporaceae	PMID:29749562
114	Paxillus involutus	Paxillaceae	ISBN:978-981-13-6381-8
115	Perenniporia fraxinea	Polyporaceae	ISBN:978-981-13-6381-8
116	Phallus indusiatus	Phallaceae	PMID:27647012
117	Phellinus chrysoloma	Hymenochaetaceae	PMID:32479001
118	Phellinus gilvus	Hymenochaetaceae	PMID:26506312
119	Phellinus igniarius	Hymenochaetaceae	PMID:29773004
120	Phellinus pini	Hymenochaetaceae	PMID:29963318
121	Pholiota nameko	Strophariaceae	PMID:30668382
122	Pholiota spumosa	Strophariaceae	ISBN:978-981-13-6381-8
123	Phylloporia ribis	Hymenochaetaceae	PMID:26506312
124	Pleurotus citrinopileatus	Pleurotaceae	PMID:29432964
125	Pleurotus cornucopiae	Pleurotaceae	PMID:30668382
126	Pleurotus cystidiosus	Pleurotaceae	ISBN:978-981-13-6381-8
127	Pleurotus djamor	Pleurotaceae	ISBN:978-981-13-6381-8
128	Pleurotus eryngii	Pleurotaceae	PMID:30073119
129	Pleurotus ferulae	Pleurotaceae	DOI:10.15414/jmbfs.2017/18.7.3.254-264
130	Pleurotus floridanus	Pleurotaceae	PMID:29773006
131	Pleurotus giganteus	Pleurotaceae	PMID:31533688
132	Pleurotus nebrodensis	Pleurotaceae	ISBN:978-981-13-6381-8
133	Pleurotus ostreatus	Pleurotaceae	PMID:30668382
134	Podaxis pistillaris	Agaricaceae	PMID:30668382
135	Polyozellus multiplex	Thelephoraceae	ISBN:978-981-13-6381-8
136	Polyporus annulatus	Polyporaceae	PMID:30123634
137	Polyporus lipsiensis	Polyporaceae	ISBN:978-981-13-6381-8
138	Polyporus umbellatus	Polyporaceae	DOI:10.1007/10_2008_26
139	Porogramme albocincta	Polyporaceae	PMID:29749562
140	Pseudoinonotus dryadeus	Hymenochaetaceae	ISBN:978-981-13-6381-8
141	Pycnoporus sanguineus	Polyporaceae	ISBN:978-981-13-6381-8
142	Rugiboletus extremiorientalis	Boletaceae	PMID:24654802
143	Russula cyanoxantha	Russulaceae	DOI:10.1007/10_2008_26
144	Russula delica	Russulaceae	PMID:29749562
145	Russula rosea	Russulaceae	PMID:27066716
146	Sanghuangporus baumii	Hymenochaetaceae	PMID:31662769
147	Sanghuangporus vaninii	Hymenochaetaceae	ISBN:978-981-10-5977-3
148	Sanghuangporus sanghuang	Hymenochaetaceae	PMID:31993039
149	Sarcodon cyrneus	Bankeraceae	PMID:24654802
150	Sarcodon glaucopus	Bankeraceae	PMID:24654802
151	Sarcodon imbricatus	Bankeraceae	PMID:24940901
152	Sarcodon laevigatus	Bankeraceae	DOI:10.1007/10_2008_26
153	Sarcodon scabrosus	Bankeraceae	PMID:24654802
154	Schizophyllum commune	Schizophyllaceae	PMID:27667511
155	Shiraia bambusicola	Shiraiaceae	PMID:32289476
156	Sparassis crispa	Sparassidaceae	PMID:22135894
157	Stereum hirsutum	Stereaceae	PMID:24054236
158	Stereum ostrea	Stereaceae	PMID:29749562
159	Stropharia rugosoannulata	Hymenogastraceae	PMID:24654802
160	Suillus flavus	Suillaceae	ISBN:978-981-13-6381-8
161	Suillus granulatus	Suillaceae	PMID:27279720
162	Suillus luteus	Suillaceae	ISBN:978-981-13-6381-8
163	Suillus placidus	Suillaceae	ISBN:978-981-13-6381-8
164	Taiwanofungus camphoratus	Polyporaceae	PMID:18778764
165	Taiwanofungus salmoneus	Polyporaceae	PMID:25380370
166	Tapinella panuoides	Tapinellaceae	ISBN:978-981-13-6381-8
167	Termitomyces heimii	Lyophyllaceae	ISBN:978-981-13-6381-8
168	Termitomyces microcarpus	Lyophyllaceae	PMID:30668382
169	Termitomyces titanicus	Lyophyllaceae	PMID:24654802
170	Tolypocladium ophioglossoides	Ophiocordycipitaceae	DOI:10.1615/IntJMedMushr.v6.i3.40
171	Trametes hirsuta	Polyporaceae	PMID:25954910
172	Trametes pubescens	Polyporaceae	PMID:30073119
173	Trametes trogii	Polyporaceae	ISBN:978-981-13-6381-8
174	Trametes versicolor	Polyporaceae	PMID:25954909
175	Tremella fuciformis	Tremellaceae	PMID:31030755
176	Tricholoma matsutake	Tricholomataceae	PMID:23510248
177	Tricholoma pardinum	Tricholomataceae	ISBN:978-981-13-6381-8
178	Tricholoma populinum	Tricholomataceae	ISBN:978-981-13-6381-8
179	Tricholomopsis rutilans	Tricholomataceae	ISBN:978-981-13-6381-8
180	Tropicoporus linteus	Hymenochaetaceae	PMID:30073119
181	Tuber melanosporum	Tuberaceae	PMID:30473664
182	Volvariella bombycina	Pluteaceae	PMID:30668382
183	Volvariella volvacea	Pluteaceae	PMID:30668382
184	Wolfiporia cocos	Polyporaceae	DOI:10.1007/10_2008_26

## Sheet: Table S4
Table S4. The table gives the curated information on medicinal fungi - secondary metabolite associations compiled from published literature in MeFSAT database.
Serial Number	Medicinal Fungi Name	Secondary Metabolite Identifier	Secondary Metabolite Name	Reference(s)
1	Agaricus amboinensis	MSID000211	2beta-Methoxy-3a,9a-dihydroxyergosta-7,22	PMID:25975187 DOI:10.1016/0031-9422(93)85177-s
2	Agaricus amboinensis	MSID000240	3a,15a -Diacetoxy-22a -hydroxylanosta-7,9(11),24-trien-26-oic acid	PMID:25975187
3	Agaricus amboinensis	MSID000284	5a,8a-Epidioxyergosta-6,9(11),22-trien-3	DOI:10.1016/0031-9422(93)85177-s
4	Agaricus amboinensis	MSID000460	Lanosta-7,9(11),24-trien-3b,15 a ,22b-triacetoxy-26-oic acid	PMID:25975187
5	Agaricus amboinensis	MSID000644	Ergosta-7,22-dien-3beta-yl palmitate	DOI:10.1016/0031-9422(93)85177-s
6	Agaricus amboinensis	MSID000836	Ganoderic acid DM	PMID:25975187
7	Agaricus amboinensis	MSID000838	Ganoderic acid F	PMID:25975187
8	Agaricus amboinensis	MSID000865	Ganoderic acid X	PMID:25975187
9	Agaricus amboinensis	MSID000883	Ganoderic acid-AM1	DOI:10.1016/0031-9422(93)85177-s
10	Agaricus amboinensis	MSID001155	Lucidone A	DOI:10.1016/0031-9422(93)85177-s
11	Agaricus amboinensis	MSID001186	Methyl ganoderate B	PMID:25975187
12	Agaricus amboinensis	MSID001595	Ganodermacetal	PMID:25975187
13	Agaricus amboinensis	MSID001636	Ganoderic acid O	PMID:25975187
14	Agaricus amboinensis	MSID001644	Ganoderic acid P	PMID:25975187
15	Agaricus amboinensis	MSID001660	Methyl ganoderate C	PMID:25975187
16	Agaricus amboinensis	MSID001690	15-Hydroxy-ganoderic acid S	PMID:25975187
17	Agaricus arvensis	MSID000145	11,12-Dihydroxy-15-drimeneoic acid	PMID:23421620
18	Agaricus arvensis	MSID000229	3,11,15-Trihydroxydrimene	PMID:23421620
19	Agaricus bisporus	MSID000002	(3.β)-Lanost-8-en-3-ol,24-methylene	DOI:10.1590/s1516-89132012000600015
20	Agaricus bisporus	MSID000131	1-Docosene	DOI:10.1590/s1516-89132012000600015
21	Agaricus bisporus	MSID000136	1-Nonadecene	DOI:10.1590/s1516-89132012000600015
22	Agaricus bisporus	MSID000140	1,3,12-Nonadecatriene	DOI:10.1590/s1516-89132012000600015
23	Agaricus bisporus	MSID000180	2,4-Difluoro-1-isocyanato-benzene	DOI:10.1590/s1516-89132012000600015
24	Agaricus bisporus	MSID000219	3-Ethyl-3-octene	DOI:10.1590/s1516-89132012000600015
25	Agaricus bisporus	MSID000997	Glucitol,4,6-O-nonylidene	DOI:10.1590/s1516-89132012000600015
26	Agaricus bisporus	MSID001103	L-ergothioneine	ISBN:978-981-13-6381-8
27	Agaricus bisporus	MSID001180	Methanamine,N-(1-methylbutylidene)	DOI:10.1590/s1516-89132012000600015
28	Agaricus bisporus	MSID001401	Squalene	DOI:10.1590/s1516-89132012000600015
29	Agaricus bisporus	MSID001472	γ-L-glutaminyl-3,4-benzoquinone	PMID:5289001
30	Agaricus bisporus	MSID001473	γ-L-glutaminyl-4-hydroxybenzene	PMID:5289001
31	Agaricus blazei	MSID000129	1-[4-(Hydroxymethyl)phenyl]hexan-1-ol	PMID:21240679
32	Agaricus blazei	MSID000243	3b,5a,6a-Trihydroxyergosta-7,22-diene 6-o-benzoate	PMID:21240679
33	Agaricus blazei	MSID000274	4'-Hydroxymethyl-1-phenyl-n-hexan-1-one	PMID:21240679
34	Agaricus blazei	MSID000312	Agariblazeispirol A	DOI:10.1016/j.tetlet.2003.08.111
35	Agaricus blazei	MSID000313	Agariblazeispirol B	DOI:10.1016/j.tetlet.2003.08.111
36	Agaricus blazei	MSID000314	Agariblazeispirol C	DOI:10.1016/j.tet.2004.10.051
37	Agaricus blazei	MSID000438	Blazeispirol A	DOI:10.1016/s0040-4039(98)02343-0
38	Agaricus blazei	MSID000439	Blazeispirol C	DOI:10.1016/s0031-9422(01)00445-9
39	Agaricus blazei	MSID000440	Blazeispirol D	DOI:10.1016/s0040-4039(01)00949-2
40	Agaricus blazei	MSID000441	Blazeispirol E	DOI:10.1016/s0031-9422(01)00445-9
41	Agaricus blazei	MSID000442	Blazeispirol F	DOI:10.1016/s0031-9422(01)00445-9
42	Agaricus blazei	MSID000443	Blazeispirol G	DOI:10.1016/s0031-9422(02)00353-9
43	Agaricus blazei	MSID000444	Blazeispirol I	DOI:10.1016/s0031-9422(02)00353-9
44	Agaricus blazei	MSID000445	Blazeispirol U	DOI:10.1016/s0031-9422(02)00353-9
45	Agaricus blazei	MSID000446	Blazeispirol V	DOI:10.1016/s0031-9422(02)00353-9
46	Agaricus blazei	MSID000447	blazeispirol V1	DOI:10.1016/s0031-9422(02)00353-9
47	Agaricus blazei	MSID000448	Blazeispirol X	DOI:10.1016/s0040-4039(00)00783-8
48	Agaricus blazei	MSID000449	Blazeispirol Z	DOI:10.1016/s0040-4039(01)00949-2
49	Agaricus blazei	MSID000450	Blazeispirol Z1	DOI:10.1016/s0031-9422(02)00353-9
50	Agaricus blazei	MSID001103	L-ergothioneine	ISBN:978-981-13-6381-8
51	Agaricus blazei	MSID001206	N-benzoyl-L-leucine methyl ester	PMID:21240679
52	Agaricus blazei	MSID001751	Blazeispirol Y	DOI:10.1016/s0040-4039(00)00783-8
53	Agaricus brasiliensis	MSID001127	Lovastatin	PMID:24941169
54	Agaricus campestris	MSID001640	Agaridoxin	PMID:944247
55	Agaricus subrufescens	MSID000315	Agaritinal	ISBN:978-3-319-25000-7
56	Agaricus sylvaticus	MSID000003	Cerevisterol	DOI:10.3724/SP.J.1145.2013.12048
57	Agaricus sylvaticus	MSID000285	Ergosterol peroxide	DOI:10.3724/SP.J.1145.2013.12048
58	Agaricus sylvaticus	MSID000311	9-Hydroxycerevistero	DOI:10.3724/SP.J.1145.2013.12048
59	Agaricus sylvaticus	MSID001209	N-nitroethylenediamine	DOI:10.1016/s0031-9422(00)91119-1
60	Agaricus sylvaticus	MSID001529	5α,6α-Epoxy-(22e,24r)-ergosta-8(14),22-diene-3β,7α-diol	DOI:10.3724/SP.J.1145.2013.12048
61	Agrocybe chaxingu	MSID000476	Chaxine B	DOI:10.1016/j.tet.2009.09.064
62	Agrocybe chaxingu	MSID000477	Chaxine C	DOI:10.1016/j.tet.2009.09.064
63	Agrocybe chaxingu	MSID000479	Chaxine D	DOI:10.1016/j.tet.2009.09.064
64	Agrocybe chaxingu	MSID000480	Chaxine E	DOI:10.1016/j.tet.2009.09.064
65	Albatrellus confluens	MSID000080	(+)-(R)-grifolinone C	PMID:18357556
66	Albatrellus confluens	MSID000093	(2')-(Z)-5-(3'-hydroxymethyl-3'-methylallyloxy)-7-methoxy-6-methylphthalide	PMID:25465923
67	Albatrellus confluens	MSID000235	3,6-Dibenzyl-2-hydroxy-5-methoxypyrazine	DOI:10.1016/0031-9422(95)00881-0
68	Albatrellus confluens	MSID000247	3R-(2R-hydroxypropyl)-8-hydroxyl-7-methyl-3,4-dihydroisocoumarine	PMID:19721259
69	Albatrellus confluens	MSID000276	5-(2',3'-Epoxy-3',3'-dimethylpropoxy)-7-methoxy-6-methylphthalide	PMID:25465923
70	Albatrellus confluens	MSID000277	5-(3',3'-Dimethylallyloxy)-7-hydroxy-6-methylphthalide	PMID:25465923
71	Albatrellus confluens	MSID000320	Albaconol	DOI:10.1002/1522-2675(20010131)84 DOI:10.1007/10_2008_26
72	Albatrellus confluens	MSID000321	Albatrellin	DOI:10.1002/ejoc.200601022
73	Albatrellus confluens	MSID000420	Aurovertin B	DOI:10.1007/10_2008_26
74	Albatrellus confluens	MSID000421	Aurovertin E	PMID:16156519 DOI:10.1007/10_2008_26
75	Albatrellus confluens	MSID000511	Conflamide B	PMID:30047265
76	Albatrellus confluens	MSID000512	Conflamide C	PMID:30047265
77	Albatrellus confluens	MSID000513	Conflamide D	PMID:30047265
78	Albatrellus confluens	MSID000514	Conflamide E	PMID:30047265
79	Albatrellus confluens	MSID000515	Conflamide F	PMID:30047265
80	Albatrellus confluens	MSID000516	Conflamide G	PMID:30047265
81	Albatrellus confluens	MSID000517	Conflamide H	PMID:30047265
82	Albatrellus confluens	MSID000518	Conflamide I	PMID:30047265
83	Albatrellus confluens	MSID000519	Confluenine A	DOI:10.1016/j.tetlet.2018.07.033
84	Albatrellus confluens	MSID000520	Confluenine B	DOI:10.1016/j.tetlet.2018.07.033
85	Albatrellus confluens	MSID000521	Confluenine C	DOI:10.1016/j.tetlet.2018.07.033
86	Albatrellus confluens	MSID000522	Confluenine D	DOI:10.1016/j.tetlet.2018.07.033
87	Albatrellus confluens	MSID000523	Confluenine E	DOI:10.1016/j.tetlet.2018.07.033
88	Albatrellus confluens	MSID000524	Confluenine F	DOI:10.1016/j.tetlet.2018.07.033
89	Albatrellus confluens	MSID000616	Emeheterone	DOI:10.1007/10_2008_26
90	Albatrellus confluens	MSID000999	Grifolin	ISBN:978-981-13-6381-8
91	Albatrellus confluens	MSID001528	5-Methoxy-3,6-bis(phenylmethyl)pyrazin-2-ol	DOI:10.1007/10_2008_26
92	Albatrellus confluens	MSID001737	8β-Hydroxy-18-norcleistanth-4(5),13(17),15-trien-3-one	PMID:19721259
93	Albatrellus confluens	MSID001747	(12β,15β,22R,23S,24S)-22,25-epoxy-12,15,23-trihydroxyergost-4,6,8(14)-trien-3-one	PMID:25465923
94	Albatrellus confluens	MSID001763	3α,5α,8β-Trihydroxycleistanth-13(17),15-dien-18-oic acid	PMID:19721259
95	Amauroderma rude	MSID000003	Cerevisterol	DOI:10.5943/ajom/1/1/10
96	Amauroderma rude	MSID000166	1H-indole-3-carboxylic acid	DOI:10.5943/ajom/1/1/10
97	Amauroderma rude	MSID000233	3,4-Dihydroxyphenylethanol	DOI:10.5943/ajom/1/1/10
98	Amauroderma rude	MSID000285	Ergosterol peroxide	DOI:10.5943/ajom/1/1/10
99	Amauroderma rude	MSID000287	6-Deoxyjacareubin	DOI:10.5943/ajom/1/1/10
100	Amauroderma rude	MSID000637	Ergosta-5,7,22-trien-3β-ol(ergosterol)	PMID:27447602 DOI:10.5943/ajom/1/1/10
101	Amauroderma rude	MSID001098	Jacareubin	DOI:10.5943/ajom/1/1/10
102	Amauroderma rude	MSID001569	Diptoindonesin D	DOI:10.5943/ajom/1/1/10
103	Amauroderma rude	MSID001612	Methyl 3,4-dihydroxybenzoate	DOI:10.5943/ajom/1/1/10
104	Amauroderma rugosum	MSID000637	Ergosta-5,7,22-trien-3β-ol(ergosterol)	PMID:24371454
105	Amauroderma rugosum	MSID001535	Amauroamoienin	DOI:10.5943/ajom/1/1/10
106	Antrodia cinnamomea	MSID000094	(22E,24R)-ergosta-4,6,8(14),22-tetraen-3-one	PMID:25053476
107	Antrodia cinnamomea	MSID000104	Antcin C	PMID:31883608 PMID:28911401 PMID:28081627 PMID:24803141 DOI:10.1016/s2225-4110(16)30114-6
108	Antrodia cinnamomea	MSID000108	Antcin K	PMID:31883608 PMID:25053476 PMID:28911401 PMID:26870680 PMID:28081627 PMID:30810393 PMID:25912848
109	Antrodia cinnamomea	MSID000120	Anticin A	PMID:31883608 PMID:28911401 PMID:28081627 PMID:30810393 PMID:24803141 DOI:10.1016/s2225-4110(16)30114-6
110	Antrodia cinnamomea	MSID000141	1,4-Dimethoxy-2,3-methylenedioxy-5-methylbenzene	DOI:10.1016/0031-9422(95)00025-3 PMID:28911401
111	Antrodia cinnamomea	MSID000222	3-Isobutyl-4-[4-(3-methyl-2-butenyloxy)phenyl]-1h-pyrrol-1-ol-2,5-dione	PMID:32133853 PMID:30810393
112	Antrodia cinnamomea	MSID000223	3-Isobutyl-4-[4-(3-methyl-2-butenyloxy)phenyl]-1h-pyrrole-2,5-dione	PMID:30810393
113	Antrodia cinnamomea	MSID000224	3-Isobutyl-4-[4-(3-methyl-2-butenyloxy)phenyl]furan-2,5-dione	ISBN:978-981-10-5977-3 PMID:30810393
114	Antrodia cinnamomea	MSID000249	Antrodin E	PMID:30810393
115	Antrodia cinnamomea	MSID000250	Antrodin D	PMID:30810393
116	Antrodia cinnamomea	MSID000258	4-Acetyantroquinonol B	PMID:29125753 ISBN:978-981-10-5977-3 PMID:30810393 DOI:10.1016/s2225-4110(16)30114-6
117	Antrodia cinnamomea	MSID000285	Ergosterol peroxide	PMID:25053476
118	Antrodia cinnamomea	MSID000328	Antcamphin A	PMID:29125753
119	Antrodia cinnamomea	MSID000329	Antcamphin B	PMID:29125753
120	Antrodia cinnamomea	MSID000330	Antcamphin E	PMID:29125753
121	Antrodia cinnamomea	MSID000331	Antcamphin F	PMID:29125753
122	Antrodia cinnamomea	MSID000332	Antcamphin I	PMID:29125753
123	Antrodia cinnamomea	MSID000333	Antcamphin J	PMID:29125753
124	Antrodia cinnamomea	MSID000334	Antcin B	PMID:31883608 PMID:28081627 PMID:30810393 PMID:24803141 DOI:10.1016/s2225-4110(16)30114-6 PMID:29125753
125	Antrodia cinnamomea	MSID000335	Zhankuic acid A	PMID:8594142 PMID:28911401
126	Antrodia cinnamomea	MSID000336	Antcamphin K	PMID:29125753
127	Antrodia cinnamomea	MSID000337	Antcamphin L	PMID:29125753
128	Antrodia cinnamomea	MSID000339	Antcin D	PMID:31883608
129	Antrodia cinnamomea	MSID000340	Antcin E	PMID:31883608 PMID:25053476
130	Antrodia cinnamomea	MSID000341	Antcin F	PMID:31883608 DOI:10.1016/0031-9422(95)00541-2
131	Antrodia cinnamomea	MSID000342	Antcin H	PMID:31883608 PMID:25053476 PMID:28081627 PMID:30810393 PMID:25912848 PMID:8594142 PMID:29234409
132	Antrodia cinnamomea	MSID000343	Antcin I	PMID:24803141 PMID:8594142 PMID:31883608
133	Antrodia cinnamomea	MSID000344	Antrocamol LT2	PMID:29125753 PMID:30810393
134	Antrodia cinnamomea	MSID000345	Antrocamol LT3	PMID:29125753 PMID:30810393
135	Antrodia cinnamomea	MSID000348	Antrocin	DOI:10.1016/0031-9422(95)00025-3
136	Antrodia cinnamomea	MSID000349	Antrocinnamomin A	PMID:30810393
137	Antrodia cinnamomea	MSID000350	Antrocinnamomin B	PMID:30810393
138	Antrodia cinnamomea	MSID000351	Antrocinnamomin C	PMID:30810393
139	Antrodia cinnamomea	MSID000352	Antrocinnamomin D	PMID:30810393
140	Antrodia cinnamomea	MSID000354	Antroquinonol	ISBN:978-981-10-5977-3 PMID:32351598 PMID:30810393 DOI:10.1016/s2225-4110(16)30114-6 PMID:29125753
141	Antrodia cinnamomea	MSID000355	Antroquinonol B	PMID:29125753 PMID:30810393
142	Antrodia cinnamomea	MSID000356	Antroquinonol C	PMID:29125753
143	Antrodia cinnamomea	MSID000357	Antroquinonol N	PMID:28898082
144	Antrodia cinnamomea	MSID000358	Antroquinonol O	PMID:28898082
145	Antrodia cinnamomea	MSID000359	Antroquinonol P	PMID:28898082
146	Antrodia cinnamomea	MSID000360	Antroquinonol Q	PMID:28898082
147	Antrodia cinnamomea	MSID000361	Antroquinonol R	PMID:28898082
148	Antrodia cinnamomea	MSID000362	Antroquinonol S	PMID:28898082
149	Antrodia cinnamomea	MSID000363	Antroquinonol T	PMID:28898082
150	Antrodia cinnamomea	MSID000364	Antroquinonol U	PMID:28898082
151	Antrodia cinnamomea	MSID000365	Antroquinonol V	PMID:28898082
152	Antrodia cinnamomea	MSID000366	Antroquinonol W	PMID:28898082
153	Antrodia cinnamomea	MSID000367	Antroquinonol X	PMID:28898082
154	Antrodia cinnamomea	MSID000470	Methyl antcinate A	DOI:10.1016/s2225-4110(16)30114-6 PMID:31883608
155	Antrodia cinnamomea	MSID000588	Dehydroeburicoic acid	PMID:28081627 ISBN:978-981-10-5977-3 PMID:28911401 PMID:30810393
156	Antrodia cinnamomea	MSID000590	Dehydrosulfurenic acid	ISBN:978-981-10-5977-3 PMID:28911401
157	Antrodia cinnamomea	MSID000605	Eburicoic acid	DOI:10.1016/s2225-4110(16)30117-1 PMID:29125753 PMID:28081627 PMID:30810393
158	Antrodia cinnamomea	MSID000790	Galactomannan	PMID:28608692
159	Antrodia cinnamomea	MSID001181	Methyl antcinate B	PMID:29125753 DOI:10.1016/s2225-4110(16)30114-6 PMID:31883608 PMID:30810393
160	Antrodia cinnamomea	MSID001182	Methyl antcinate G	PMID:31883608 DOI:10.1016/0031-9422(95)00541-2
161	Antrodia cinnamomea	MSID001183	Methyl antcinate H	PMID:31883608 DOI:10.1016/0031-9422(95)00541-2
162	Antrodia cinnamomea	MSID001217	Nerolidol	DOI:10.1021/jf402187q
163	Antrodia cinnamomea	MSID001228	Orsellinic acid	PMID:30810393 PMID:28255687
164	Antrodia cinnamomea	MSID001298	Pinicolol B	PMID:28167294
165	Antrodia cinnamomea	MSID001481	Methyl antcinate K	PMID:31883608
166	Antrodia cinnamomea	MSID001482	(R,S)-antcin H	PMID:28911401
167	Antrodia cinnamomea	MSID001514	3b,15 a-Dihydroxylanosta-7,9(11),24-trien-21-oic acid	PMID:25053476
168	Antrodia cinnamomea	MSID001524	4-Acetylantrocamol LT3	PMID:29125753
169	Antrodia cinnamomea	MSID001536	Antcamphin C	PMID:29125753
170	Antrodia cinnamomea	MSID001537	Antcamphin D	PMID:29125753
171	Antrodia cinnamomea	MSID001538	Antcamphin G	PMID:29125753
172	Antrodia cinnamomea	MSID001539	Antcamphin H	PMID:29125753
173	Antrodia cinnamomea	MSID001540	Antcamphin M	PMID:31645125
174	Antrodia cinnamomea	MSID001553	Antcin M	PMID:31883608
175	Antrodia cinnamomea	MSID001554	Antcin N	PMID:31883608
176	Antrodia cinnamomea	MSID001555	Antrocinnamone	PMID:29125753 PMID:30810393
177	Antrodia cinnamomea	MSID001556	Antroquinonol M	PMID:29125753
178	Antrodia cinnamomea	MSID001827	Antrocamol LT1	PMID:29125753 PMID:30810393
179	Antrodia cinnamomea	MSID001829	Methyl antcinate L	PMID:31883608
180	Antrodia cinnamomea	MSID001830	Methyl antcinate N	PMID:31883608
181	Armillaria mellea	MSID000110	(2S)-1-[2-(furan-2-yl)-2-oxoethyl]-5-oxopyrrolidine-2-carboxylic acid	DOI:10.1002/hlca.201200186
182	Armillaria mellea	MSID000121	(R)-2-(2-(furan-2-yl)-oxoethyl)-octahydropyrrolo[1,2-a]pyrazine-1,4-dione	PMID:23323802
183	Armillaria mellea	MSID000127	1-[2-(Furan-2-yl)-2-oxoethyl]piperidin-2-one	DOI:10.1002/hlca.201200186
184	Armillaria mellea	MSID000128	1-[2-(Furan-2-yl)-2-oxoethyl]pyrrolidin-2-one	DOI:10.1002/hlca.201200186
185	Armillaria mellea	MSID000267	4-O-methylmelleolide	PMID:4040154
186	Armillaria mellea	MSID000283	5'-O-methylmelledonal	DOI:10.1016/s0031-9422(00)84599-9
187	Armillaria mellea	MSID000386	Armillaramide	DOI:10.1016/s0367-326x(01)00319-7
188	Armillaria mellea	MSID000387	Armillaridin	PMID:6548820
189	Armillaria mellea	MSID000388	Armillarikin	PMID:27536140 PMID:17262464
190	Armillaria mellea	MSID000389	Armillarin	PMID:6548820
191	Armillaria mellea	MSID000390	Armillol	DOI:10.1039/c39820000135
192	Armillaria mellea	MSID000391	Armillyl everninate	DOI:10.1021/np50043a013
193	Armillaria mellea	MSID000392	Arnamial	PMID:19795841
194	Armillaria mellea	MSID001099	Judeol	PMID:4040154
195	Armillaria mellea	MSID001103	L-ergothioneine	ISBN:978-981-13-6381-8
196	Armillaria mellea	MSID001167	Melledonal	DOI:10.1016/s0040-4039(00)95035-4
197	Armillaria mellea	MSID001168	Melledonol	DOI:10.1016/s0040-4039(00)95035-4
198	Armillaria mellea	MSID001169	Melleolide	DOI:10.1016/s0040-4039(00)87383-9
199	Armillaria mellea	MSID001170	Melleolide B	DOI:10.1016/S0031-9422(00)85503-X DOI:10.1016/B978-0-12-802794-3.00008-4
200	Armillaria mellea	MSID001171	Melleolide C	DOI:10.1016/S0031-9422(00)85503-X DOI:10.1016/B978-0-12-802794-3.00008-4
201	Armillaria mellea	MSID001172	Melleolide D	DOI:10.1016/S0031-9422(00)85503-X DOI:10.1016/B978-0-12-802794-3.00008-4
202	Armillaria mellea	MSID001174	Melleolide L	PMID:10805573
203	Armillaria mellea	MSID001175	Melleolide M	PMID:10805573
204	Armillaria mellea	MSID001176	Melleolide N	PMID:26035099
205	Armillaria mellea	MSID001177	Melleolide R	PMID:26035099
206	Armillaria mellea	MSID001801	Methyl (2s)-1-[2-(furan-2-yl)-2-oxoethyl]-5-oxopyrrolidine-2-carboxylate	DOI:10.1002/hlca.201200186
207	Armillaria mellea	MSID001809	Arnamiol	DOI:10.1021/np50043a013 PMID:26035099
208	Armillaria ostoyae	MSID001173	Melleolide H	ISBN:978-981-13-6381-8
209	Astraeus asiaticus	MSID000204	Artabotryol C1	DOI:10.1016/j.tet.2017.01.070
210	Astraeus asiaticus	MSID000394	Artabotryol D	DOI:10.1016/j.tet.2017.01.070
211	Astraeus asiaticus	MSID000415	Astraodoric acid C	DOI:10.1016/j.tet.2017.01.070
212	Astraeus asiaticus	MSID000416	Austraeusin O	DOI:10.1016/j.tet.2017.01.070
213	Astraeus asiaticus	MSID000417	Astrasiaone	DOI:10.1016/j.tet.2017.01.070
214	Astraeus asiaticus	MSID000418	Astrasiate	DOI:10.1016/j.tet.2017.01.070
215	Astraeus asiaticus	MSID001089	Austraeusin N	DOI:10.1016/j.tet.2017.01.070
216	Astraeus asiaticus	MSID001090	Epi-inotodiol	DOI:10.1016/j.tet.2017.01.070
217	Astraeus asiaticus	MSID001500	26-Epi-astrasiaone	DOI:10.1016/j.tet.2017.01.070
218	Astraeus asiaticus	MSID001557	Austraeusin M	PMID:29749562 DOI:10.1016/j.tet.2017.01.070
219	Astraeus asiaticus	MSID001558	Austraeusin P	DOI:10.1016/j.tet.2017.01.070
220	Astraeus asiaticus	MSID001559	Austraeusin Q	DOI:10.1016/j.tet.2017.01.070
221	Astraeus hygrometricus	MSID000411	Astrakurkurol	PMID:22899612
222	Astraeus hygrometricus	MSID000412	Astrakurkurone	PMID:22899612 PMID:29749562
223	Astraeus odoratus	MSID000395	Artabotryols A	PMID:22957940
224	Astraeus odoratus	MSID000397	Astraeusin A	DOI:10.1016/j.tet.2016.04.057
225	Astraeus odoratus	MSID000398	Astraeusin B	DOI:10.1016/j.tet.2016.04.057
226	Astraeus odoratus	MSID000399	Astraeusin C	DOI:10.1016/j.tet.2016.04.057
227	Astraeus odoratus	MSID000400	Astraeusin D	DOI:10.1016/j.tet.2016.04.057
228	Astraeus odoratus	MSID000401	Astraeusin E	DOI:10.1016/j.tet.2016.04.057
229	Astraeus odoratus	MSID000402	Astraeusin F	DOI:10.1016/j.tet.2016.04.057
230	Astraeus odoratus	MSID000403	Astraeusin G	DOI:10.1016/j.tet.2016.04.057
231	Astraeus odoratus	MSID000404	Astraodoric acid D	PMID:22957940
232	Astraeus odoratus	MSID000405	Astraeusin H	DOI:10.1016/j.tet.2016.04.057
233	Astraeus odoratus	MSID000406	Astraeusin I	DOI:10.1016/j.tet.2016.04.057
234	Astraeus odoratus	MSID000407	Astraeusin J	DOI:10.1016/j.tet.2016.04.057
235	Astraeus odoratus	MSID000408	Astraeusin K	DOI:10.1016/j.tet.2016.04.057
236	Astraeus odoratus	MSID000409	Astraeusin K epimer	DOI:10.1016/j.tet.2016.04.057
237	Astraeus odoratus	MSID000410	Astraeusin L	DOI:10.1016/j.tet.2016.04.057
238	Astraeus odoratus	MSID000413	Astraodoric acid A	PMID:22957940
239	Astraeus odoratus	MSID000414	Astraodoric acid B	PMID:22957940
240	Astraeus odoratus	MSID000415	Astraodoric acid C	PMID:22957940
241	Auricularia nigricans	MSID000003	Cerevisterol	PMID:11914973
242	Auricularia nigricans	MSID000311	9-Hydroxycerevistero	PMID:11914973
243	Boletus edulis	MSID000090	(1S)-(3-ethenylphenyl)-1,2-ethanediol	PMID:17440922
244	Boletus edulis	MSID000092	(1S)-(4-acetylphenyl)-1,2-ethanediol	PMID:17440922
245	Boletus edulis	MSID000124	1-(3-Ethylphenyl)-1,2-ethanediol	PMID:17440922
246	Boletus edulis	MSID000125	1-(3-Formylphenyl)-ethanone	PMID:17440922
247	Boletus edulis	MSID000126	1-(4-Ethylphenyl)-1,2-ethanediol	PMID:17440922
248	Calvatia gigantea	MSID000474	Catechin	DOI:10.1111/jfpp.13386
249	Cantharellus cibarius	MSID000143	10E,14Z)-9-oxooctadeca-10,14-dien-12-ynoic acid	PMID:22342624
250	Cantharellus cibarius	MSID000487	Cibaric acid	DOI:10.1021/jo00003a054
251	Cantharellus cibarius	MSID001103	L-ergothioneine	ISBN:978-981-13-6381-8
252	Clitopaxillus alexandri	MSID000488	Cinnamic acid	ISBN:978-981-13-6381-8
253	Coprinopsis cinerea	MSID000119	(E)-beta-caryophyllene	ISBN:978-981-10-5977-3
254	Coprinopsis cinerea	MSID000303	7,7a-Diepicoprinastatin 1	ISBN:978-981-10-5977-3
255	Coprinopsis cinerea	MSID000304	Coprinastatin 1	ISBN:978-981-10-5977-3
256	Coprinopsis cinerea	MSID000324	Alpha-cuprenene	ISBN:978-981-10-5977-3
257	Coprinopsis cinerea	MSID000326	Alpha-muurolene	ISBN:978-981-10-5977-3
258	Coprinopsis cinerea	MSID000525	Coprinol	ISBN:978-981-10-5977-3
259	Coprinopsis cinerea	MSID001265	Pentalenene	ISBN:978-981-10-5977-3
260	Coprinopsis cinerea	MSID001489	14-Hydroxy-5-desoxy-2s,3s,9r-illudosin	ISBN:978-981-10-5977-3
261	Coprinopsis cinerea	MSID001526	4,5-Dehydro-5-deoxyarmillol	ISBN:978-981-10-5977-3
262	Coprinus comatus	MSID001127	Lovastatin	PMID:24941169
263	Coprinus comatus	MSID001470	γ-Aminobutyric acid	PMID:24941169
264	Cordyceps militaris	MSID000533	Cordycepin	PMID:31454995 PMID:31018574 PMID:14796634 PMID:29594343 PMID:24941169 PMID:30594983 PMID:25789604 PMID:15458324 PMID:31450828
265	Cordyceps militaris	MSID001470	γ-Aminobutyric acid	PMID:24941169
266	Coriolopsis gallica	MSID000792	Gallicynoic acid A	PMID:18247526
267	Coriolopsis gallica	MSID000793	Gallicynoic acid B	PMID:18247526
268	Coriolopsis gallica	MSID000794	Gallicynoic acid C	PMID:18247526
269	Coriolopsis gallica	MSID000795	Gallicynoic acid D	PMID:18247526
270	Coriolopsis gallica	MSID000796	Gallicynoic acid E	PMID:18247526
271	Coriolopsis gallica	MSID000797	Gallicynoic acid F	PMID:18247526
272	Coriolopsis gallica	MSID000798	Gallicynoic acid G	PMID:18247526
273	Coriolopsis gallica	MSID000799	Gallicynoic acid H	PMID:18247526
274	Coriolopsis gallica	MSID000800	Gallicynoic acid I	PMID:18247526
275	Craterellus cornucopioides	MSID000268	4-Oxohex-1,6-diyl diacetate	DOI:10.1016/s1875-5364(10)60011-8
276	Craterellus cornucopioides	MSID000269	4-Oxohex-5-enyl acetate	DOI:10.1016/s1875-5364(10)60011-8
277	Craterellus cornucopioides	MSID000290	6-Hydroxy-4-oxohexyl acetate	DOI:10.1016/s1875-5364(10)60011-8
278	Cryptoporus volvatus	MSID000539	Cryptoporic acid B	DOI:10.1016/s0040-4039(01)91358-9
279	Cryptoporus volvatus	MSID000540	Cryptoporic acid D	DOI:10.1039/c39890000258
280	Cryptoporus volvatus	MSID000541	Cryptoporic acid E	DOI:10.1039/c39890000258
281	Cryptoporus volvatus	MSID000546	Cryptoporic acid R	DOI:10.1016/j.phytol.2015.09.005
282	Cryptoporus volvatus	MSID000547	Cryptoporic acid S	PMID:27756154
283	Cryptoporus volvatus	MSID001719	Cryptoporic acid A	DOI:10.1016/s0040-4039(01)91358-9
284	Cyathus africanus	MSID000559	Cyathatriol	DOI:10.1139/v79-543
285	Cyathus africanus	MSID000563	Cyathin Q	PMID:26871659
286	Cyathus africanus	MSID000565	Cyathin T	PMID:26022233
287	Cyathus africanus	MSID000566	Cyathin V	PMID:26022233
288	Cyathus africanus	MSID001211	Neocyathin S	PMID:30327549
289	Cyathus africanus	MSID001212	Neocyathin T	PMID:30327549
290	Cyathus africanus	MSID001704	Cyathin W	PMID:26022233
291	Cyathus gansuensis	MSID000560	Cyathin J	PMID:24444922
292	Cyathus gansuensis	MSID000561	Cyathin K	PMID:24444922
293	Cyathus gansuensis	MSID000562	Cyathin L	PMID:24444922
294	Cyathus gansuensis	MSID001703	Cyathin M	PMID:24444922
295	Cyathus gansuensis	MSID001724	Cyathin N	PMID:24444922
296	Cyathus gansuensis	MSID001725	Cyathin O	PMID:24444922
297	Cyathus gansuensis	MSID001726	Cyathin P	PMID:24444922
298	Cyathus hookeri	MSID000552	Cyahookerin A	PMID:31244147
299	Cyathus hookeri	MSID000553	Cyahookerin B	PMID:31244147
300	Cyathus hookeri	MSID000554	Cyahookerin C	PMID:31244147
301	Cyathus hookeri	MSID000555	Cyahookerin D	PMID:31244147
302	Cyathus hookeri	MSID000556	Cyahookerin E	PMID:31244147
303	Cyathus hookeri	MSID000557	Cyahookerin F	PMID:31244147
304	Cyathus stercoreus	MSID000567	Cyathusal A	DOI:10.1007/10_2008_26 PMID:17511503
305	Cyathus stercoreus	MSID000568	Cyathusal B	DOI:10.1007/10_2008_26 PMID:17511503
306	Cyathus stercoreus	MSID000569	Cyathusal C	DOI:10.1007/10_2008_26 PMID:17511503
307	Cyathus stercoreus	MSID001335	Pulvinatal	DOI:10.1007/10_2008_26
308	Cyclocybe aegerita	MSID000319	Agrocybolacton	PMID:12458772
309	Cyclocybe aegerita	MSID001560	Bovistol A	PMID:31164938
310	Cyclocybe cylindracea	MSID000288	6-Hydroxy- 1h-indole-3-acetamide	PMID:9249978
311	Cyclocybe cylindracea	MSID000289	6-Hydroxy-1h-indole-3-carbaldehyde	PMID:9249978
312	Cyclocybe cylindracea	MSID000318	Agrocybenine	DOI:10.1016/0040-4039(96)00900-8 ISBN:978-981-13-6381-8
313	Cyclocybe cylindracea	MSID001103	L-ergothioneine	ISBN:978-981-13-6381-8
314	Daedalea quercina	MSID000285	Ergosterol peroxide	DOI:10.1016/s0031-9422(00)00130-8
315	Daedalea quercina	MSID001336	Quercinic acid B	DOI:10.1016/s0031-9422(00)00130-8
316	Daedalea quercina	MSID001337	Quercinic acid C	DOI:10.1016/s0031-9422(00)00130-8
317	Daedalea quercina	MSID001662	3a-Carboxyacetoxy-24-methyl-23-oxolanost-8-en-26-oic acid (carboxyacetylquercinic acid)	DOI:10.1016/s0031-9422(00)00130-8
318	Daedalea quercina	MSID001732	16-O-acetylpolyporenic acid C	DOI:10.1016/s0031-9422(00)00130-8
319	Daedalea quercina	MSID001736	3α-Oxepanoquercinic acid C	DOI:10.1016/s0031-9422(00)00130-8
320	Daedalea quercina	MSID001765	16α-Hydroxy-24-methylene-3-oxolanost-8-en-21-oic acid	DOI:10.1016/s0031-9422(00)00130-8
321	Daedalea quercina	MSID001770	3a -Carboxyacetoxy-24-methylene-23-oxolanost-8-en-26-oic acid (carboxyacetylquercinic acidderivative 01)	DOI:10.1016/s0031-9422(00)00130-8
322	Daldinia concentrica	MSID000095	(22E)-cholesta-4,6,8(14),22-tetraen-3-on	PMID:12502330
323	Daldinia concentrica	MSID000134	1-Isopropyl-2,7-di-methylnaphthalene	DOI:10.1007/10_2008_26
324	Daldinia concentrica	MSID000305	7,8-Dehydronorbotryal	PMID:19160523
325	Daldinia concentrica	MSID000306	7a-Acetoxy-15-methoxy-10-O-methyl-deacetyldihydrobotrydial	PMID:19160523
326	Daldinia concentrica	MSID000307	7alpha-Acetoxydeacetylbotryenedial	PMID:19160523
327	Daldinia concentrica	MSID000308	7alpha-Acetoxydehydrobotrydienal	PMID:19160523
328	Daldinia concentrica	MSID000309	7alpha-Hydroxybotryenalol	PMID:19160523
329	Daldinia concentrica	MSID000473	Caruilignan D	PMID:12502330
330	Daldinia concentrica	MSID000506	Concentricol	DOI:10.1007/10_2008_26 DOI:10.1016/s0031-9422(01)00032-2
331	Daldinia concentrica	MSID000507	Concentricol B	DOI:10.1007/10_2008_26 DOI:10.1016/s0031-9422(02)00264-9
332	Daldinia concentrica	MSID000508	Concentricol C	DOI:10.1007/10_2008_26 DOI:10.1016/s0031-9422(02)00264-9
333	Daldinia concentrica	MSID000509	Concentricol D	DOI:10.1007/10_2008_26 DOI:10.1016/s0031-9422(02)00264-9
334	Daldinia concentrica	MSID000510	Concentricolide	DOI:10.1002/hlca.200690004 DOI:10.1007/10_2008_26
335	Daldinia concentrica	MSID000577	Daldinan B	PMID:29715021
336	Daldinia concentrica	MSID000578	Daldinan C	PMID:29715021
337	Daldinia concentrica	MSID000579	Daldinin A	PMID:18503188
338	Daldinia concentrica	MSID000580	Daldinin B	PMID:18503188
339	Daldinia concentrica	MSID000581	Daldinol	DOI:10.24496/tennenyuki.37.0_409
340	Daldinia concentrica	MSID000582	Daldinolide A	PMID:29715021
341	Daldinia concentrica	MSID000583	Daldinolide B	PMID:29715021
342	Daldinia concentrica	MSID000584	Daldinone B	PMID:12502330
343	Daldinia concentrica	MSID000585	Daldiquinone	PMID:29715021
344	Daldinia concentrica	MSID001006	Hept-6-ene-2,4,5-triols	DOI:10.1007/10_2008_26
345	Daldinia concentrica	MSID001498	21-(Acetyloxy)-6,13,14-trihydroxy-16,18-dimethyl-10-phenyl[11]cytochalasa-7,19-dien-1-one	DOI:10.1007/10_2008_26
346	Daldinia concentrica	MSID001734	(17β,20R,22E,24R)-1-methyl-19-norergosta-1,3,5,7,9,14,22-heptaene	DOI:10.1007/10_2008_26 PMID:15620272
347	Daldinia concentrica	MSID001754	(17β,20R,22E,24R)-19-norergosta-1,3,5,7,9,14,22-heptaene	DOI:10.1007/10_2008_26 PMID:15620272
348	Daldinia concentrica	MSID001805	Methyl 7alpha-acetoxydeacetylbotryoloate	PMID:19160523
349	Daldinia concentrica	MSID001828	5-Methoxy-2-methyl-1,4-benzoquinones	DOI:10.1007/10_2008_26
350	Engleromyces goetzei	MSID000164	19,20-Epoxycytochalasin D	DOI:10.1002/1522-2675(200205)85
351	Engleromyces goetzei	MSID000216	3-Deoxysambucinol	PMID:25633363
352	Engleromyces goetzei	MSID000310	8-Deoxytrichothecin	PMID:25633363
353	Engleromyces goetzei	MSID000570	Cyclonerodiol	PMID:25633363
354	Engleromyces goetzei	MSID000576	Cytochalasin D	DOI:10.1002/1522-2675(200205)85
355	Engleromyces goetzei	MSID001213	Neoengleromycin	DOI:10.1002/1522-2675(200205)85
356	Engleromyces goetzei	MSID001368	Sambucinol	PMID:25633363
357	Engleromyces goetzei	MSID001457	Trichodermol	PMID:25633363
358	Engleromyces goetzei	MSID001460	Trichothecin	PMID:25633363
359	Engleromyces goetzei	MSID001461	Trichothecinol A	PMID:25633363
360	Engleromyces goetzei	MSID001462	Trichothecinol B	PMID:25633363
361	Engleromyces goetzei	MSID001463	Trichothecolone	PMID:25633363
362	Engleromyces goetzei	MSID001570	Engleromycone A	PMID:25633363
363	Engleromyces goetzei	MSID001571	Engleromycone B	PMID:25633363
364	Engleromyces goetzei	MSID001601	Infuscol F	PMID:25633363
365	Fistulina hepatica	MSID000142	10-Hydroxydeca-trans-2,trans-8-dien-4,6-diinsaeuremethylester	PMID:4799454
366	Fistulina hepatica	MSID000489	Cinnatriacetin A	PMID:10470684
367	Flammulina velutipes	MSID000139	1,2,6,10-Tetrahydroxy-3,9-epoxy-14-nor-5(15)-eudesmane	PMID:27684789 PMID:32733077
368	Flammulina velutipes	MSID000178	2,3,4,5-Tetrahydro-2,7-dihydroxy-5,8,10,10-tetramethyl-2,5-methano-1-benzoxepin	PMID:32733077 DOI:10.1016/s0031-9422(00)00189-8
369	Flammulina velutipes	MSID000183	2,5-Cuparadiene-1,4-dione	PMID:32733077 PMID:29243621
370	Flammulina velutipes	MSID000230	3,14,25-Trihydroxy-24-hydroxymethylergosta-7,22-dien-6-one	PMID:27684789
371	Flammulina velutipes	MSID000238	3,9,25-Trihydroxy-24-hydroxymethylergosta-7,22-dien-6-one	PMID:27684789
372	Flammulina velutipes	MSID000278	5-(Hydroxymethyl)-2-(prop-1-en-2-yl)cyclohexanol	ISBN:978-981-10-5977-3
373	Flammulina velutipes	MSID000281	5-Methyl-2-(3-oxo-1,2,2-trimethylcyclopentyl)benzoquinone	PMID:32733077 DOI:10.1016/s0031-9422(00)00189-8
374	Flammulina velutipes	MSID000302	7,13,14-Trihydroxy-4-cadinen-15-oic acid methyl ester	PMID:27684789 PMID:32733077
375	Flammulina velutipes	MSID000617	Enokipodin C	PMID:32733077 PMID:11473426
376	Flammulina velutipes	MSID000618	Enokipodin D	PMID:32733077 PMID:11473426
377	Flammulina velutipes	MSID000619	Enokipodin E	PMID:32733077 ISBN:978-981-10-5977-3 PMID:29243621
378	Flammulina velutipes	MSID000620	Enokipodin F	PMID:32733077 ISBN:978-981-10-5977-3 PMID:29243621
379	Flammulina velutipes	MSID000621	Enokipodin G	PMID:32733077 ISBN:978-981-10-5977-3 PMID:29243621
380	Flammulina velutipes	MSID000622	Enokipodin H	PMID:32733077 ISBN:978-981-10-5977-3 PMID:29243621
381	Flammulina velutipes	MSID000623	Enokipodin I	PMID:32733077 ISBN:978-981-10-5977-3
382	Flammulina velutipes	MSID000624	Enokipodin J	PMID:32733077 ISBN:978-981-10-5977-3
383	Flammulina velutipes	MSID000715	Flammufuranone A	PMID:27684789 PMID:32733077
384	Flammulina velutipes	MSID000716	Flammufuranone B	PMID:27684789 PMID:32733077
385	Flammulina velutipes	MSID000717	Flammulinol A	PMID:32733077 DOI:10.1016/j.tet.2012.02.021
386	Flammulina velutipes	MSID000718	Flammulinolide A	PMID:32733077 DOI:10.1016/j.tet.2012.02.021
387	Flammulina velutipes	MSID000719	Flammulinolide B	PMID:32733077 DOI:10.1016/j.tet.2012.02.021
388	Flammulina velutipes	MSID000720	Flammulinolide C	PMID:32733077 DOI:10.1016/j.tet.2012.02.021
389	Flammulina velutipes	MSID000721	Flammulinolide D	PMID:32733077 DOI:10.1016/j.tet.2012.02.021
390	Flammulina velutipes	MSID000722	Flammulinolide E	PMID:32733077 DOI:10.1016/j.tet.2012.02.021
391	Flammulina velutipes	MSID000723	Flammulinolide F	PMID:32733077 DOI:10.1016/j.tet.2012.02.021
392	Flammulina velutipes	MSID000724	Flammulinolide G	PMID:32733077 DOI:10.1016/j.tet.2012.02.021
393	Flammulina velutipes	MSID000725	Flammuspirone A	PMID:27684789 PMID:32733077
394	Flammulina velutipes	MSID000726	Flammuspirone B	PMID:27684789 PMID:32733077
395	Flammulina velutipes	MSID000727	Flammuspirone C	PMID:27684789 PMID:32733077
396	Flammulina velutipes	MSID000728	Flammuspirone D	PMID:27684789 PMID:32733077
397	Flammulina velutipes	MSID000729	Flammuspirone E	PMID:27684789 PMID:32733077
398	Flammulina velutipes	MSID000730	Flammuspirone F	PMID:27684789 PMID:32733077
399	Flammulina velutipes	MSID000731	Flammuspirone G	PMID:27684789 PMID:32733077
400	Flammulina velutipes	MSID000732	Flammuspirone H	PMID:27684789 PMID:32733077
401	Flammulina velutipes	MSID000733	Flammuspirone I	PMID:27684789 PMID:32733077
402	Flammulina velutipes	MSID000734	Flammuspirone J	PMID:27684789 PMID:32733077
403	Flammulina velutipes	MSID000735	Flamvelutpenoid A	PMID:32733077 ISBN:978-981-10-5977-3
404	Flammulina velutipes	MSID000736	Flamvelutpenoid B	PMID:32733077 ISBN:978-981-10-5977-3 DOI:10.1002/hlca.201100289
405	Flammulina velutipes	MSID000737	Flamvelutpenoid C	PMID:32733077 ISBN:978-981-10-5977-3 DOI:10.1002/hlca.201100289
406	Flammulina velutipes	MSID000738	Flamvelutpenoid D	PMID:32733077 ISBN:978-981-10-5977-3 DOI:10.1002/hlca.201100289
407	Flammulina velutipes	MSID000739	Flamvelutpenoid E	PMID:27684789 PMID:32733077 ISBN:978-981-10-5977-3
408	Flammulina velutipes	MSID000740	Flamvelutpenoid F	PMID:27684789 PMID:32733077 ISBN:978-981-10-5977-3
409	Flammulina velutipes	MSID001427	Sterpuric acid	PMID:32733077 DOI:10.1016/0040-4020(81)85074-0
410	Flammulina velutipes	MSID001428	Sterpurol A	PMID:32733077 PMID:29243621
411	Flammulina velutipes	MSID001429	Sterpurol B	PMID:32733077
412	Flammulina velutipes	MSID001483	(R)-8-hydroxy-4,7,7-trimethyl-7,8-dihydrocyclopenta[e]isoindole-1,3(2h,6h)-dione	PMID:32733077
413	Flammulina velutipes	MSID001696	(1R,2R,4R,8R)-(-)-p-menthane-2,8,9-triol	PMID:32733077
414	Flammulina velutipes	MSID001697	(1R,2R,4R,8S)-(-)-p-menthane-2,8,9-triol	PMID:27396999 PMID:32733077
415	Fomes fomentarius	MSID000088	(1R)-(3-acetophenyl)-1,2-ethanediol	PMID:23421717
416	Fomes fomentarius	MSID000089	(1R)-(3-ethenylphenyl)-1,2-ethanediol	PMID:23421717
417	Fomes fomentarius	MSID000091	(1R)-(3-formylphenyl)-1,2-ethanediol	PMID:23421717
418	Fomes fomentarius	MSID000645	Ergosta-7,22-diene-3-one	DOI:10.1039/jr9580002603
419	Fomes fomentarius	MSID000750	Fomentaric acid	DOI:10.1016/s0040-4039(00)90505-7
420	Fomes fomentarius	MSID000751	Fomentarol A	PMID:23747096
421	Fomes fomentarius	MSID000752	Fomentarol B	PMID:23747096
422	Fomes fomentarius	MSID000753	Fomentarol C	PMID:23747096
423	Fomes fomentarius	MSID000754	Fomentarol D	PMID:23747096
424	Fomitopsis betulina	MSID000170	2-(4-Methyl-l-cyclohex-3-enyl)propan-2-ol(alpha-terpineol)	PMID:25892909
425	Fomitopsis betulina	MSID000237	3,7-Dimethylocta-1,6-dien-3-ol(linalool)	PMID:25892909
426	Fomitopsis betulina	MSID001299	Piptamine	PMID:11099232
427	Fomitopsis betulina	MSID001300	Piptolinic acid A	PMID:28800422 ISBN:978-981-13-6381-8
428	Fomitopsis betulina	MSID001301	Piptolinic acid B	PMID:28800422 ISBN:978-981-13-6381-8
429	Fomitopsis betulina	MSID001302	Piptolinic acid C	PMID:28800422 ISBN:978-981-13-6381-8
430	Fomitopsis betulina	MSID001303	Piptolinic acid D	PMID:28800422 ISBN:978-981-13-6381-8
431	Fomitopsis betulina	MSID001304	Piptolinic acid E	PMID:28800422 ISBN:978-981-13-6381-8
432	Fomitopsis officinalis	MSID000588	Dehydroeburicoic acid	PMID:32271491
433	Fomitopsis officinalis	MSID000590	Dehydrosulfurenic acid	PMID:32271491
434	Fomitopsis officinalis	MSID000591	Fomefficinic acid B	PMID:32271491
435	Fomitopsis officinalis	MSID000643	3β-Hydroxyergosta-7,22-diene	PMID:32271491
436	Fomitopsis officinalis	MSID000744	Fomefficinic acid A	PMID:32271491
437	Fomitopsis officinalis	MSID000745	Fomefficinic acid C	PMID:32271491
438	Fomitopsis officinalis	MSID000747	Fomefficinic acid D	PMID:32271491
439	Fomitopsis officinalis	MSID000748	Fomefficinol A	PMID:32271491
440	Fomitopsis officinalis	MSID000749	Fomefficinol B	PMID:32271491
441	Fomitopsis officinalis	MSID000764	Fomitopsin C	PMID:32271491
442	Fomitopsis officinalis	MSID000765	Fomitopsin E	PMID:32271491
443	Fomitopsis officinalis	MSID000766	Fomitopsin F	PMID:32271491
444	Fomitopsis officinalis	MSID000767	Fomitopsin D	PMID:32271491
445	Fomitopsis officinalis	MSID000774	Fomlactone A	PMID:32271491
446	Fomitopsis officinalis	MSID000775	Fomlactone B	PMID:32271491
447	Fomitopsis officinalis	MSID001110	Laricinolic acid	PMID:32271491 DOI:10.1039/b001984o
448	Fomitopsis officinalis	MSID001219	Officimalonic acid A	PMID:32271491
449	Fomitopsis officinalis	MSID001220	Officimalonic acid B	PMID:32271491
450	Fomitopsis officinalis	MSID001221	Officimalonic acid C	PMID:32271491
451	Fomitopsis officinalis	MSID001222	Officimalonic acid D	PMID:32271491
452	Fomitopsis officinalis	MSID001223	Officimalonic acid E	PMID:32271491
453	Fomitopsis officinalis	MSID001224	Officimalonic acid F	PMID:32271491
454	Fomitopsis officinalis	MSID001225	Officimalonic acid G	PMID:32271491
455	Fomitopsis officinalis	MSID001226	Officimalonic acid H	PMID:32271491
456	Fomitopsis officinalis	MSID001250	Fomitopsin G	PMID:29417466
457	Fomitopsis officinalis	MSID001491	15α-Hydroxy-3-oxo-24-methylenelanosta-7,9(11)-dien-21-oic acid	PMID:29417466 PMID:32271491
458	Fomitopsis officinalis	MSID001568	Demalonyl fomitopsin H	PMID:29417466
459	Fomitopsis officinalis	MSID001577	Fomefficinic acid	PMID:32271491
460	Fomitopsis officinalis	MSID001578	Fomitopsin D ethyl ester	PMID:29417466
461	Fomitopsis officinalis	MSID001579	Fomitopsin H	PMID:29417466
462	Fomitopsis officinalis	MSID001711	Fomefficinic acid E	PMID:32271491
463	Fomitopsis palustris	MSID001236	Palustrisoic acid A	PMID:29715599
464	Fomitopsis palustris	MSID001237	Palustrisoic acid B	PMID:29715599
465	Fomitopsis palustris	MSID001238	Palustrisoic acid C	PMID:29715599
466	Fomitopsis palustris	MSID001239	Palustrisoic acid D	PMID:29715599
467	Fomitopsis palustris	MSID001240	Palustrisoic acid E	PMID:29715599
468	Fomitopsis palustris	MSID001241	Palustrisoic acid F	PMID:29715599
469	Fomitopsis palustris	MSID001242	Palustrisoic acid G	PMID:29715599
470	Fomitopsis palustris	MSID001244	Palustrisoic acid H	PMID:29715599
471	Fomitopsis palustris	MSID001245	Palustrisolide A	PMID:29715599
472	Fomitopsis palustris	MSID001246	Palustrisolide B	PMID:29715599
473	Fomitopsis palustris	MSID001247	Palustrisolide E	PMID:29715599
474	Fomitopsis palustris	MSID001248	Palustrisolide C	PMID:29715599
475	Fomitopsis palustris	MSID001249	Palustrisolide D	PMID:29715599
476	Fomitopsis palustris	MSID001251	Palustrisolide F	PMID:29715599
477	Fomitopsis palustris	MSID001252	Palustrisolide G	PMID:29715599
478	Fomitopsis palustris	MSID001479	(25S,30S)-(+)-12a-hydroxy-3a-[30-hydroxy-30-methylglutaryloxy]-24-methyllanosta-8,24(31)-dien-26-oic acid	PMID:29715599
479	Fomitopsis palustris	MSID001480	(25S,30S)-(+)-12a-hydroxy-3a-[30-hydroxy-40- methoxycarbonyl-30-methylbutyryloxy]-24-methyllanosta-8,24(31)-dien-26-oic acid	PMID:29715599
480	Fomitopsis palustris	MSID001694	Pachymic acid	PMID:29715599
481	Fomitopsis palustris	MSID001707	Polyporenic acid B	PMID:29715599
482	Fomitopsis palustris	MSID001764	3a-Acetylpolyporenic acid	PMID:29715599
483	Fomitopsis pinicola	MSID000001	Trametenolic acid B	DOI:10.1016/s0031-9422(99)00349-0
484	Fomitopsis pinicola	MSID000084	(+)-Lanosta-7,9(11),24-triene-3beta,21-diol	DOI:10.1016/s0031-9422(99)00349-0
485	Fomitopsis pinicola	MSID000195	21-Hydroxylanosta-7,9( 11) -24-trien-3-one	DOI:10.1016/s0031-9422(99)00349-0
486	Fomitopsis pinicola	MSID000196	21-Hydroxylanosta-8,24-dien-3-one	DOI:10.1039/jr9570003437
487	Fomitopsis pinicola	MSID000245	3beta-Linoleyloxyergosta-7,24(28)-diene	DOI:10.1016/s0031-9422(00)00165-5
488	Fomitopsis pinicola	MSID000317	Agnosterone	DOI:10.1016/s0031-9422(99)00349-0
489	Fomitopsis pinicola	MSID000322	Alpha-barbatene	ISBN:978-981-10-5977-3
490	Fomitopsis pinicola	MSID000323	Alpha-copaene	ISBN:978-981-10-5977-3
491	Fomitopsis pinicola	MSID000326	Alpha-muurolene	ISBN:978-981-10-5977-3
492	Fomitopsis pinicola	MSID000431	beta-Barbatene	ISBN:978-981-10-5977-3
493	Fomitopsis pinicola	MSID000432	beta-Copaene	ISBN:978-981-10-5977-3
494	Fomitopsis pinicola	MSID000595	Delta-cadinene	ISBN:978-981-10-5977-3
495	Fomitopsis pinicola	MSID000596	Delta6-protoilludene	ISBN:978-981-10-5977-3
496	Fomitopsis pinicola	MSID000761	Fomitopinic acid A	PMID:15679320
497	Fomitopsis pinicola	MSID000762	Fomitopinic acid B	PMID:15679320
498	Fomitopsis pinicola	MSID000763	Fomitopsic acid B	DOI:10.1016/s0031-9422(99)00349-0
499	Fomitopsis pinicola	MSID000768	Fomitoside C	PMID:15679320
500	Fomitopsis pinicola	MSID000769	Fomitoside D	PMID:15679320
501	Fomitopsis pinicola	MSID000770	Fomitoside E	PMID:15679320
502	Fomitopsis pinicola	MSID000771	Fomitoside F	PMID:15679320
503	Fomitopsis pinicola	MSID000772	Fomitoside G	PMID:15679320
504	Fomitopsis pinicola	MSID000773	Fomitoside H	PMID:15679320
505	Fomitopsis pinicola	MSID000801	Gamma-cadinene	ISBN:978-981-10-5977-3
506	Fomitopsis pinicola	MSID000802	Gamma-muurolene	ISBN:978-981-10-5977-3
507	Fomitopsis pinicola	MSID000996	Gloeophyllic acid A	DOI:10.1016/s0031-9422(00)00165-5
508	Fomitopsis pinicola	MSID001103	L-ergothioneine	ISBN:978-981-13-6381-8
509	Fomitopsis pinicola	MSID001243	Polyporenic acid A	DOI:10.1039/jr9400000632
510	Fomitopsis pinicola	MSID001294	Pinicolic acid B	DOI:10.1016/s0031-9422(99)00349-0
511	Fomitopsis pinicola	MSID001295	Pinicolic acid C	DOI:10.1016/s0031-9422(99)00349-0
512	Fomitopsis pinicola	MSID001296	Pinicolic acid D	DOI:10.1016/s0031-9422(99)00349-0
513	Fomitopsis pinicola	MSID001297	Pinicoloform	DOI:10.5281/zenodo.3541180
514	Fomitopsis pinicola	MSID001298	Pinicolol B	DOI:10.1016/s0031-9422(99)00349-0
515	Fomitopsis pinicola	MSID001709	Fomitoside I	PMID:15679320
516	Fomitopsis pinicola	MSID001710	Fomitoside J	PMID:15679320
517	Fomitopsis pinicola	MSID001723	Fomitoside B	PMID:15679320
518	Fomitopsis pinicola	MSID001757	Fomitoside A	PMID:15679320
519	Ganoderma applanatum	MSID000003	Cerevisterol	PMID:16833015
520	Ganoderma applanatum	MSID000010	(-)-Applanatumol D	DOI:10.1016/j.tet.2016.06.019
521	Ganoderma applanatum	MSID000011	(+)-Applanatumol D	DOI:10.1016/j.tet.2016.06.019
522	Ganoderma applanatum	MSID000012	(-)-Applanatumol E	DOI:10.1016/j.tet.2016.06.019
523	Ganoderma applanatum	MSID000013	(-)-Applanatumol F	DOI:10.1016/j.tet.2016.06.019
524	Ganoderma applanatum	MSID000014	(+)-Applanatumol E	DOI:10.1016/j.tet.2016.06.019
525	Ganoderma applanatum	MSID000015	(+)-Applanatumol F	DOI:10.1016/j.tet.2016.06.019
526	Ganoderma applanatum	MSID000016	(-)-Applanatumol G	DOI:10.1016/j.tet.2016.06.019
527	Ganoderma applanatum	MSID000017	(+)-Applanatumol G	DOI:10.1016/j.tet.2016.06.019
528	Ganoderma applanatum	MSID000018	(-)-Applanatumol I	DOI:10.1016/j.tet.2016.06.019
529	Ganoderma applanatum	MSID000019	(+)-Applanatumol I	DOI:10.1016/j.tet.2016.06.019
530	Ganoderma applanatum	MSID000020	(-)-Applanatumol L	DOI:10.1016/j.tet.2016.06.019
531	Ganoderma applanatum	MSID000021	(+)-Applanatumol L	DOI:10.1016/j.tet.2016.06.019
532	Ganoderma applanatum	MSID000022	(-)-Applanatumol M	DOI:10.1016/j.tet.2016.06.019
533	Ganoderma applanatum	MSID000023	(+)-Applanatumol M	DOI:10.1016/j.tet.2016.06.019
534	Ganoderma applanatum	MSID000024	(-)-Applanatumol N	DOI:10.1016/j.tet.2016.06.019
535	Ganoderma applanatum	MSID000025	(+)-Applanatumol N	DOI:10.1016/j.tet.2016.06.019
536	Ganoderma applanatum	MSID000026	(-)-Applanatumol O	DOI:10.1016/j.tet.2016.06.019
537	Ganoderma applanatum	MSID000027	(+)-Applanatumol O	DOI:10.1016/j.tet.2016.06.019
538	Ganoderma applanatum	MSID000028	(-)-Applanatumol P	DOI:10.1016/j.tet.2016.06.019
539	Ganoderma applanatum	MSID000029	(+)-Applanatumol P	DOI:10.1016/j.tet.2016.06.019
540	Ganoderma applanatum	MSID000030	(-)-Applanatumol Q	DOI:10.1016/j.tet.2016.06.019
541	Ganoderma applanatum	MSID000031	(+)-Applanatumol Q	DOI:10.1016/j.tet.2016.06.019
542	Ganoderma applanatum	MSID000032	(-)-Applanatumol R	DOI:10.1016/j.tet.2016.06.019
543	Ganoderma applanatum	MSID000033	(+)-Applanatumol R	DOI:10.1016/j.tet.2016.06.019
544	Ganoderma applanatum	MSID000034	(-)-Applanatumol U	DOI:10.1016/j.tet.2016.06.019
545	Ganoderma applanatum	MSID000035	(+)-Applanatumol U	DOI:10.1016/j.tet.2016.06.019
546	Ganoderma applanatum	MSID000036	(-)-Applanatumol V	DOI:10.1016/j.tet.2016.06.019
547	Ganoderma applanatum	MSID000037	(+)-Applanatumol V	DOI:10.1016/j.tet.2016.06.019
548	Ganoderma applanatum	MSID000038	(-)-Applanatumol W	DOI:10.1016/j.tet.2016.06.019
549	Ganoderma applanatum	MSID000039	(+)-Applanatumol W	DOI:10.1016/j.tet.2016.06.019
550	Ganoderma applanatum	MSID000040	(-)-Applanatumol X	DOI:10.1016/j.tet.2016.06.019
551	Ganoderma applanatum	MSID000041	(+)-Applanatumol X	DOI:10.1016/j.tet.2016.06.019
552	Ganoderma applanatum	MSID000042	(-)-Applanatumol Y	DOI:10.1016/j.tet.2016.06.019
553	Ganoderma applanatum	MSID000043	(+)-Applanatumol Y	DOI:10.1016/j.tet.2016.06.019
554	Ganoderma applanatum	MSID000044	(-)-Applanatumol Z	DOI:10.1016/j.tet.2016.06.019
555	Ganoderma applanatum	MSID000045	(+)-Applanatumol Z	DOI:10.1016/j.tet.2016.06.019
556	Ganoderma applanatum	MSID000046	(-)-Applanatumol Z2	DOI:10.1016/j.tet.2016.06.019
557	Ganoderma applanatum	MSID000047	(+)-Applanatumol Z2	DOI:10.1016/j.tet.2016.06.019
558	Ganoderma applanatum	MSID000054	(-)-Chizhine D	DOI:10.1016/j.tet.2014.12.052
559	Ganoderma applanatum	MSID000055	(+)-Chizhine D	DOI:10.1016/j.tet.2014.12.052
560	Ganoderma applanatum	MSID000060	(-)-Ganoapplanatumine A	DOI:10.1016/j.tet.2016.06.019
561	Ganoderma applanatum	MSID000061	(+)-Ganoapplanatumine A	DOI:10.1016/j.tet.2016.06.019
562	Ganoderma applanatum	MSID000072	(+)-Applanatumol C	DOI:10.1016/j.tet.2016.06.019
563	Ganoderma applanatum	MSID000184	2,5-Dihydroxy benzoic acid	PMID:25975187
564	Ganoderma applanatum	MSID000186	2,5-Dihydroxyacetophenone	PMID:25975187
565	Ganoderma applanatum	MSID000232	3,4-Dihydroxybenzaldehyde	PMID:25975187
566	Ganoderma applanatum	MSID000246	3beta,7beta,20,23xi-Tetrahydroxy-11,15-D	PMID:15270562 PMID:25975187
567	Ganoderma applanatum	MSID000368	Applamatine B	DOI:10.1016/j.tet.2010.10.014 PMID:25975187
568	Ganoderma applanatum	MSID000369	Applanatine A	DOI:10.1016/j.tet.2010.10.014 PMID:25975187
569	Ganoderma applanatum	MSID000370	Applanatin A	DOI:10.1515/znb-2007-1016
570	Ganoderma applanatum	MSID000371	Applanatin B	DOI:10.1515/znb-2007-1016
571	Ganoderma applanatum	MSID000372	Applanatine C	DOI:10.1016/j.tet.2010.10.014 PMID:25975187
572	Ganoderma applanatum	MSID000373	Applanatine D	DOI:10.1016/j.tet.2010.10.014 PMID:25975187
573	Ganoderma applanatum	MSID000374	Applanatine E	DOI:10.1016/j.tet.2010.10.014 PMID:25975187
574	Ganoderma applanatum	MSID000375	Applanatumin A	PMID:25706347
575	Ganoderma applanatum	MSID000376	Applanatumol J	DOI:10.1016/j.tet.2016.06.019
576	Ganoderma applanatum	MSID000377	Applanatumol T	DOI:10.1016/j.tet.2016.06.019
577	Ganoderma applanatum	MSID000378	Applanatumol Z1	DOI:10.1016/j.tet.2016.06.019
578	Ganoderma applanatum	MSID000379	Applanoxidic acid A	DOI:10.1016/0031-9422(91)83476-2 PMID:25975187 DOI:10.22159/ajpcr.2019.v12i4.32124
579	Ganoderma applanatum	MSID000380	Applanoxidic acid E	DOI:10.1016/s0031-9422(00)94843-x PMID:25975187
580	Ganoderma applanatum	MSID000382	Applanoxidic acid F	DOI:10.1016/s0367-326x(03)00064-9 PMID:25975187 DOI:10.22159/ajpcr.2019.v12i4.32124
581	Ganoderma applanatum	MSID000383	Applanoxidic acid G	DOI:10.1016/s0031-9422(00)94843-x PMID:25975187 DOI:10.22159/ajpcr.2019.v12i4.32124
582	Ganoderma applanatum	MSID000384	Elfvingic acid B	PMID:11975498
583	Ganoderma applanatum	MSID000385	Applanoxidic acid H	DOI:10.1016/s0367-326x(03)00064-9 PMID:25975187
584	Ganoderma applanatum	MSID000606	Echinolactone D	PMID:25975187
585	Ganoderma applanatum	MSID000607	Elfvingic acid A	PMID:11975498
586	Ganoderma applanatum	MSID000609	Elfvingic acid C	PMID:11975498
587	Ganoderma applanatum	MSID000610	Elfvingic acid D	PMID:11975498
588	Ganoderma applanatum	MSID000611	Elfvingic acid E	PMID:11975498
589	Ganoderma applanatum	MSID000612	Elfvingic acid F	PMID:11975498
590	Ganoderma applanatum	MSID000613	Elfvingic acid G	PMID:11975498
591	Ganoderma applanatum	MSID000614	Elfvingic acid H	PMID:11975498
592	Ganoderma applanatum	MSID000615	Elfvingic acid H Me ester	PMID:11975498
593	Ganoderma applanatum	MSID000642	5,6-Dihydroergosterol	PMID:25975187
594	Ganoderma applanatum	MSID000803	Ganoapplanatumine B	DOI:10.1016/j.tet.2016.06.019
595	Ganoderma applanatum	MSID000818	Ganoderenic acid A	PMID:25975187
596	Ganoderma applanatum	MSID000821	Ganoderenic acid D	PMID:25975187
597	Ganoderma applanatum	MSID000823	Ganoderenic acid F	PMID:25975187
598	Ganoderma applanatum	MSID000824	Ganoderenic acid G	PMID:25975187
599	Ganoderma applanatum	MSID000825	Resinacein K	PMID:25975187
600	Ganoderma applanatum	MSID000828	Ganoderic acid B8	PMID:25975187
601	Ganoderma applanatum	MSID000830	Ganoderic acid AP2	PMID:25975187 PMID:18591828
602	Ganoderma applanatum	MSID000831	Ganoderic acid AP3	PMID:18591828
603	Ganoderma applanatum	MSID000883	Ganoderic acid-AM1	PMID:25975187
604	Ganoderma applanatum	MSID000901	Ganoderma aldehyde	DOI:10.1016/s0367-326x(02)00013-8 PMID:25975187
605	Ganoderma applanatum	MSID000913	Ganodermycin	PMID:25975187
606	Ganoderma applanatum	MSID001103	L-ergothioneine	ISBN:978-981-13-6381-8
607	Ganoderma applanatum	MSID001391	Spiroapplanatumine A	PMID:27996259
608	Ganoderma applanatum	MSID001392	Spiroapplanatumine B	PMID:27996259
609	Ganoderma applanatum	MSID001393	Spiroapplanatumine C	PMID:27996259
610	Ganoderma applanatum	MSID001394	Spiroapplanatumine D	PMID:27996259
611	Ganoderma applanatum	MSID001395	Spiroapplanatumine E	PMID:27996259
612	Ganoderma applanatum	MSID001396	Spiroapplanatumine F	PMID:27996259
613	Ganoderma applanatum	MSID001397	Spiroapplanatumine N	PMID:27996259
614	Ganoderma applanatum	MSID001398	Spiroapplanatumine O	PMID:27996259
615	Ganoderma applanatum	MSID001399	Spiroapplanatumine Q	PMID:27996259
616	Ganoderma applanatum	MSID001492	16 a -Hydroxy-3-oxolanosta-7,9(11),24-trien-21-oic acid	PMID:25975187
617	Ganoderma applanatum	MSID001499	24N-methyl-5 a -lanosta-25-one	PMID:25975187
618	Ganoderma applanatum	MSID001510	3a ,16a,26-Trihydroxylanosta-7,9(11),24-trien-21-oic acid	PMID:25975187
619	Ganoderma applanatum	MSID001533	7b,23n-Dihydroxy-3,11,15-trioxolanosta-8,20e(22)-dien-26-oic acid	PMID:25975187
620	Ganoderma applanatum	MSID001580	Furanoganoderic acid	PMID:25975187
621	Ganoderma applanatum	MSID001584	Ganoderenic acid I	PMID:25975187
622	Ganoderma applanatum	MSID001588	Ganoderic acid AP	PMID:25975187
623	Ganoderma applanatum	MSID001652	7beta,20,23xi-Trihydroxy-3,11,15-trioxol	PMID:15270562
624	Ganoderma applanatum	MSID001654	7b,20,23n-Trihydroxy-3,11,15-trioxolanosta-8-en-26-oic acid	PMID:25975187
625	Ganoderma applanatum	MSID001662	3a-Carboxyacetoxy-24-methyl-23-oxolanost-8-en-26-oic acid (carboxyacetylquercinic acid)	PMID:25975187
626	Ganoderma applanatum	MSID001666	Spiroapplanatumine I	PMID:27996259
627	Ganoderma applanatum	MSID001667	Spiroapplanatumine J	PMID:27996259
628	Ganoderma applanatum	MSID001668	(+)-Applanatumol K	DOI:10.1016/j.tet.2016.06.019
629	Ganoderma applanatum	MSID001669	(-)-Applanatumol K	DOI:10.1016/j.tet.2016.06.019
630	Ganoderma applanatum	MSID001676	Spiroapplanatumine H	PMID:27996259
631	Ganoderma applanatum	MSID001677	Spiroapplanatumine G	PMID:27996259
632	Ganoderma applanatum	MSID001678	Spiroapplanatumine L	PMID:27996259
633	Ganoderma applanatum	MSID001679	Spiroapplanatumine M	PMID:27996259
634	Ganoderma applanatum	MSID001698	(-)-Applanatumol H	DOI:10.1016/j.tet.2016.06.019
635	Ganoderma applanatum	MSID001699	(+)-Applanatumol H	DOI:10.1016/j.tet.2016.06.019
636	Ganoderma applanatum	MSID001701	(-)-Ganoapplanin	PMID:27934392
637	Ganoderma applanatum	MSID001702	(+)-Ganoapplanin	PMID:27934392
638	Ganoderma applanatum	MSID001716	Applanoxidic acid B	PMID:25975187 DOI:10.22159/ajpcr.2019.v12i4.32124
639	Ganoderma applanatum	MSID001717	Applanoxidic acid C	DOI:10.1016/0031-9422(91)83476-2 PMID:25975187 DOI:10.22159/ajpcr.2019.v12i4.32124
640	Ganoderma applanatum	MSID001718	Applanoxidic acid D	DOI:10.1016/0031-9422(91)83476-2 PMID:25975187 DOI:10.22159/ajpcr.2019.v12i4.32124
641	Ganoderma applanatum	MSID001758	3a,16a -Dihydroxylanosta-7,9(11),24-trien-21-oic acid	PMID:25975187
642	Ganoderma applanatum	MSID001760	7b-Hydroxy-3,11,15,23-tetraoxolanosta-8,20e(22)-dien-26-oic acid methyl ester	PMID:25975187
643	Ganoderma applanatum	MSID001770	3a -Carboxyacetoxy-24-methylene-23-oxolanost-8-en-26-oic acid (carboxyacetylquercinic acidderivative 01)	PMID:25975187
644	Ganoderma applanatum	MSID001774	Spiroapplanatumine K	PMID:27996259
645	Ganoderma applanatum	MSID001775	Spiroapplanatumine P	PMID:27996259
646	Ganoderma applanatum	MSID001815	beta-Amyrenone	PMID:25975187
647	Ganoderma applanatum	MSID001819	Daucosterol	PMID:25975187
648	Ganoderma applanatum	MSID001820	Friedelin	PMID:25975187
649	Ganoderma applanatum	MSID001821	beta-Amyrin acetate	PMID:25975187
650	Ganoderma atrum	MSID001490	15α-Acetoxy-5α-lanosta-7,9(11),24-trien-3β,26-diol	PMID:26709153 PMID:29603608
651	Ganoderma atrum	MSID001493	16α,20-Dihydroxy-3,23-dioxo-5α-lanosta-6,8-dien-26-oic acid	PMID:26709153
652	Ganoderma atrum	MSID001511	3a-Acetoxy-5a-lanosta-8,24(240)-dien-21-oic acid	PMID:29603608
653	Ganoderma atrum	MSID001513	3b-Hydroxy-15a-acetoxy-5alanosta-7,9(11),24-trien-26-al	PMID:29603608
654	Ganoderma atrum	MSID001521	3α-Acetoxy-5α-lanosta-8,24(24′)-dien-21-oic acid	PMID:26709153
655	Ganoderma atrum	MSID001522	3β-Hydroxy-15α-acetoxy-5α-lanosta-7,9(11),24-trien-26-al	PMID:26709153
656	Ganoderma atrum	MSID001523	3β-Hydroxy-7,22-dioxo-5α-lanosta-8,24-dien-21-oic acid	PMID:26709153
657	Ganoderma australe	MSID000193	20-Hydroxy-3,12,15,23-tetraoxolanosta-7,9(11),16-trien-26-oic acid	PMID:28931319
658	Ganoderma australe	MSID000379	Applanoxidic acid A	PMID:25975187
659	Ganoderma australe	MSID000382	Applanoxidic acid F	PMID:25975187
660	Ganoderma australe	MSID000383	Applanoxidic acid G	PMID:25975187
661	Ganoderma australe	MSID000422	Australic acid	PMID:25975187
662	Ganoderma australe	MSID000423	Austrolactone	PMID:25975187
663	Ganoderma australe	MSID001608	Lanosta-7,9(11),24-trien-3b,21-diol	PMID:25975187
664	Ganoderma australe	MSID001613	Methyl australate	PMID:25975187
665	Ganoderma australe	MSID001717	Applanoxidic acid C	PMID:25975187
666	Ganoderma capense	MSID001581	Ganocapensin A	ISBN:978-981-10-5977-3
667	Ganoderma capense	MSID001582	Ganocapensin B	ISBN:978-981-10-5977-3
668	Ganoderma capense	MSID001597	Ganomycin E	ISBN:978-981-10-5977-3
669	Ganoderma capense	MSID001598	Ganomycin F	ISBN:978-981-10-5977-3
670	Ganoderma carnosum	MSID000208	26,27-Dihydroxylanosta-7,9(11),24-trien-3,16-dione	DOI:10.1016/s0031-9422(97)00381-6 PMID:25975187
671	Ganoderma cochlear	MSID000058	(-)-Cochlactone A	PMID:29707952
672	Ganoderma cochlear	MSID000059	(+)-Cochlactone A	PMID:29707952
673	Ganoderma cochlear	MSID000495	Cochlearoid A	PMID:26024438
674	Ganoderma cochlear	MSID000779	Fornicatin D	PMID:24559087 PMID:25975187
675	Ganoderma cochlear	MSID000780	Fornicatin E	PMID:24559087
676	Ganoderma cochlear	MSID000781	Fornicatin F	PMID:24559087
677	Ganoderma cochlear	MSID000811	Ganocin A	PMID:25192355
678	Ganoderma cochlear	MSID000812	Ganocin B	PMID:25192355
679	Ganoderma cochlear	MSID000813	Ganocin C	PMID:25192355
680	Ganoderma cochlear	MSID000814	Ganocin D	PMID:25192355
681	Ganoderma cochlear	MSID000817	Ganodercochlearin C	PMID:24559087 PMID:25975187
682	Ganoderma cochlear	MSID001062	Inonotsuoxide B	PMID:25975187
683	Ganoderma cochlear	MSID001516	3b,22s-Dihydroxylanosta-7,9(11),24-triene	PMID:25975187
684	Ganoderma cochlear	MSID001650	Ganoderchochlearin A	PMID:24559087 PMID:25975187
685	Ganoderma cochlear	MSID001651	Ganoderchochlearin B	PMID:24559087 PMID:25975187
686	Ganoderma cochlear	MSID001670	(−)-Cochlearol A	PMID:25402560
687	Ganoderma cochlear	MSID001671	(+)-Cochlearol A	PMID:25402560
688	Ganoderma cochlear	MSID001672	(−)-Cochlearol B	PMID:25402560
689	Ganoderma cochlear	MSID001673	(+)-Cochlearol B	PMID:25402560
690	Ganoderma cochlear	MSID001728	Cochlate A	PMID:24559087
691	Ganoderma cochlear	MSID001729	Cochlate B	PMID:24559087 PMID:25975187
692	Ganoderma cochlear	MSID001730	Cochlearoid C	PMID:26024438
693	Ganoderma gibbosum	MSID000381	Gibbosic acid N	PMID:31310122
694	Ganoderma gibbosum	MSID000608	Gibbosic acid I	PMID:31310122
695	Ganoderma gibbosum	MSID000978	Gibbosic acid J	PMID:31310122
696	Ganoderma gibbosum	MSID000979	Gibbosic acid K	PMID:31310122
697	Ganoderma gibbosum	MSID000980	Gibbosic acid L	PMID:31310122
698	Ganoderma gibbosum	MSID000981	Gibbosic acid M	PMID:31310122
699	Ganoderma gibbosum	MSID000982	Gibbosic acid O	PMID:31310122
700	Ganoderma gibbosum	MSID000983	Gibbosicolid A	PMID:31310122
701	Ganoderma gibbosum	MSID000984	Gibbosicolid B	PMID:31310122
702	Ganoderma gibbosum	MSID000985	Gibbosicolid C	PMID:31310122
703	Ganoderma gibbosum	MSID000986	Gibbosicolid D	PMID:31310122
704	Ganoderma gibbosum	MSID000987	Gibbosicolid E	PMID:31310122
705	Ganoderma gibbosum	MSID000988	Gibbosicolid F	PMID:31310122
706	Ganoderma gibbosum	MSID000989	Gibbosicolid G	PMID:31310122
707	Ganoderma hainanense	MSID000316	Agnosterol (lanosta-7,9(11),24-trien-3b-ol)	PMID:25975187
708	Ganoderma hainanense	MSID000866	Ganoderic acid T-Q	PMID:25975187
709	Ganoderma hainanense	MSID000875	Ganoderic acid Y	PMID:25975187
710	Ganoderma hainanense	MSID001002	Hainanic acid A	PMID:25457485
711	Ganoderma hainanense	MSID001166	Me lucidenate N	PMID:23909866
712	Ganoderma hainanense	MSID001742	16α,26-Dihydroxylanosta-8,24-dien-3-one	PMID:23909866 PMID:25975187
713	Ganoderma hainanense	MSID001776	Ganoderic acid S	PMID:25975187
714	Ganoderma leucocontextum	MSID000820	Ganoderenic acid C	PMID:29603608
715	Ganoderma leucocontextum	MSID000841	Ganoderic acid GS-2	PMID:29603608
716	Ganoderma leucocontextum	MSID000844	Ganoderic acid I	PMID:29603608
717	Ganoderma leucocontextum	MSID000849	Ganoderic acid L	PMID:29603608
718	Ganoderma leucocontextum	MSID000924	Ganoleucin D	PMID:28536459
719	Ganoderma leucocontextum	MSID000925	Ganoleucoin J	PMID:26287401
720	Ganoderma leucocontextum	MSID000926	Ganoleucoin K	PMID:26287401
721	Ganoderma leucocontextum	MSID000927	Ganoleucoin L	PMID:26287401
722	Ganoderma leucocontextum	MSID000928	Ganoleuconin A	PMID:26287401
723	Ganoderma leucocontextum	MSID000929	Ganoleuconin B	PMID:26287401
724	Ganoderma leucocontextum	MSID000930	Ganoleuconin C	PMID:26287401
725	Ganoderma leucocontextum	MSID000931	Ganoleuconin D	PMID:26287401
726	Ganoderma leucocontextum	MSID000932	Ganoleuconin E	PMID:26287401
727	Ganoderma leucocontextum	MSID000933	Ganoleuconin F	PMID:26287401
728	Ganoderma leucocontextum	MSID000934	Ganoleuconin G	PMID:26287401
729	Ganoderma leucocontextum	MSID000935	Ganoleuconin H	PMID:26287401
730	Ganoderma leucocontextum	MSID000936	Ganoleuconin I	PMID:26287401
731	Ganoderma leucocontextum	MSID000937	Ganoleuconin M	PMID:26287401
732	Ganoderma leucocontextum	MSID000938	Ganoleuconin N	PMID:26287401
733	Ganoderma leucocontextum	MSID000939	Ganoleuconin O	PMID:26287401
734	Ganoderma leucocontextum	MSID000940	Ganoleuconin P	PMID:26287401
735	Ganoderma leucocontextum	MSID000966	Ganosinensine	PMID:29603608
736	Ganoderma leucocontextum	MSID001394	Spiroapplanatumine D	PMID:29603608
737	Ganoderma leucocontextum	MSID001599	Ganomycin J	PMID:29603608
738	Ganoderma leucocontextum	MSID001614	Methyl ganoderate L	PMID:29603608
739	Ganoderma leucocontextum	MSID001631	Spirolingzhine A	PMID:29603608
740	Ganoderma leucocontextum	MSID001632	Spirolingzhine B	PMID:29603608
741	Ganoderma leucocontextum	MSID001649	Ganoderic acid C2	PMID:29603608
742	Ganoderma leucocontextum	MSID001653	7b,20,23f-Trihydroxy-3,11,15-trioxolanosta-8-en-26-oic acid	PMID:29603608
743	Ganoderma leucocontextum	MSID001679	Spiroapplanatumine M	PMID:29603608
744	Ganoderma leucocontextum	MSID001777	Ganoleucoin Q	PMID:29603608
745	Ganoderma leucocontextum	MSID001778	Ganoleucoin R	PMID:29603608
746	Ganoderma leucocontextum	MSID001779	Ganoleucoin S	PMID:29603608
747	Ganoderma leucocontextum	MSID001794	Ganoleucoin AA	PMID:30145334
748	Ganoderma leucocontextum	MSID001795	Ganoleucoin T	PMID:30145334
749	Ganoderma leucocontextum	MSID001796	Ganoleucoin V	PMID:30145334
750	Ganoderma leucocontextum	MSID001797	Ganoleucoin X	PMID:30145334
751	Ganoderma leucocontextum	MSID001798	Ganoleucoin Y	PMID:30145334
752	Ganoderma leucocontextum	MSID001799	Ganoleucoin Z	PMID:30145334
753	Ganoderma lucidum	MSID000048	(-)-Chizhine A	DOI:10.1016/j.tet.2014.12.052
754	Ganoderma lucidum	MSID000049	(-)-Chizhine B	DOI:10.1016/j.tet.2014.12.052
755	Ganoderma lucidum	MSID000050	(+)-Chizhine A	DOI:10.1016/j.tet.2014.12.052
756	Ganoderma lucidum	MSID000051	(+)-Chizhine B	DOI:10.1016/j.tet.2014.12.052
757	Ganoderma lucidum	MSID000052	(-)-Chizhine C	DOI:10.1016/j.tet.2014.12.052
758	Ganoderma lucidum	MSID000053	(+)-Chizhine C	DOI:10.1016/j.tet.2014.12.052
759	Ganoderma lucidum	MSID000056	(-)-Chizhine E	DOI:10.1016/j.tet.2014.12.052
760	Ganoderma lucidum	MSID000057	(-)-Chizhine F	DOI:10.1016/j.tet.2014.12.052
761	Ganoderma lucidum	MSID000071	(-)-Lingzhiol	PMID:24128039
762	Ganoderma lucidum	MSID000073	(+)-Lingzhiol	PMID:24128039
763	Ganoderma lucidum	MSID000082	(+)-23-Oxo-3,4-seco-lanosta-4(28),7(8),9(11),24(31)-tetraene-3,26-dicarboxylic acid	PMID:16356517
764	Ganoderma lucidum	MSID000083	(+)-Epogymnolactam	PMID:25242622
765	Ganoderma lucidum	MSID000100	(24E)-9a,11a-epoxy-3b-hydroxylanosta-7,24-dien-26-al	PMID:25631072
766	Ganoderma lucidum	MSID000123	1 -Methyl-4-( 1 -methylethenyl) -cyclohexene(limonene)	PMID:25892909
767	Ganoderma lucidum	MSID000146	12-Epi-ganoderlactone D	DOI:10.1016/j.phytol.2016.03.007
768	Ganoderma lucidum	MSID000149	12b-Acetoxy-3b-hydroxy-7,11,15,23-tetraoxo-lanost-8,20e-diene-26-oic acid	PMID:18696320 DOI:10.22159/ajpcr.2019.v12i4.32124
769	Ganoderma lucidum	MSID000170	2-(4-Methyl-l-cyclohex-3-enyl)propan-2-ol(alpha-terpineol)	PMID:25892909
770	Ganoderma lucidum	MSID000188	20-Hydroxy lucidenic acid A	PMID:25975187
771	Ganoderma lucidum	MSID000189	20-Hydroxy lucidenic acid D2	PMID:15844948 PMID:25975187
772	Ganoderma lucidum	MSID000190	20-Hydroxy lucidenic acid E2	PMID:15844948 PMID:25975187
773	Ganoderma lucidum	MSID000191	20-Hydroxy lucidenic acid F	PMID:15844948 PMID:25975187
774	Ganoderma lucidum	MSID000192	20-Hydroxy lucidenic acid N	PMID:15844948 PMID:25975187
775	Ganoderma lucidum	MSID000194	20-Hydroxylucidenic acid P	PMID:15844948
776	Ganoderma lucidum	MSID000197	22b-Acetoxy-3a,15a-trihydroxylanosta-7,9(11),24-trien-26-oic acid	PMID:25975187 PMID:21401205
777	Ganoderma lucidum	MSID000198	22b-Acetoxy-3b,15 a -dihydroxylanosta-7,9(11),24-trien-26-oic acid	PMID:25975187
778	Ganoderma lucidum	MSID000199	23-Hydroxy ganoderic acid S	PMID:20384295 PMID:29749562 PMID:25975187
779	Ganoderma lucidum	MSID000200	23S-hydroxy-3,7,11,15-tetraoxo-lanost-8,24e-diene-26-oicacid	PMID:18696320
780	Ganoderma lucidum	MSID000205	26-Hydroxy-5 a -lanosta-7,9(11),24-triene-3,22-dione	PMID:25975187
781	Ganoderma lucidum	MSID000207	26,27-Dihydroxy-5 a -lanosta-7,9(11),24-triene-3,22-dione	PMID:25975187
782	Ganoderma lucidum	MSID000227	3-O-acetylganoderic acid K	DOI:10.1002/hlca.200900028 PMID:25975187
783	Ganoderma lucidum	MSID000237	3,7-Dimethylocta-1,6-dien-3-ol(linalool)	PMID:25892909
784	Ganoderma lucidum	MSID000240	3a,15a -Diacetoxy-22a -hydroxylanosta-7,9(11),24-trien-26-oic acid	PMID:21401205
785	Ganoderma lucidum	MSID000241	3b,15a -Diacetoxy-22a-hydroxylanosta-7,9(11),24-trien-26-oic acid	PMID:25975187
786	Ganoderma lucidum	MSID000242	3b,15 a -Diacetoxy lanosta-8,24-dien-26-oic acid	PMID:25975187 PMID:21401205
787	Ganoderma lucidum	MSID000255	3β,5α-Dihydroxy-(22e,24r)-ergosta-7,22-dien-6β-yl oleate	DOI:10.1007/10_2008_26
788	Ganoderma lucidum	MSID000284	5a,8a-Epidioxyergosta-6,9(11),22-trien-3	PMID:25975187
789	Ganoderma lucidum	MSID000285	Ergosterol peroxide	PMID:31936890
790	Ganoderma lucidum	MSID000293	6b-Hydroxy-ergosta-4,7,22-trien-3-one	PMID:25975187
791	Ganoderma lucidum	MSID000294	6 a -Hydroxy-ergosta-4,7,22-trien-3-one	PMID:25975187
792	Ganoderma lucidum	MSID000299	7-Ergostenol	PMID:25975187
793	Ganoderma lucidum	MSID000300	7-O-ethyl ganoderic acid O	PMID:20706913 PMID:25975187
794	Ganoderma lucidum	MSID000301	7-Oxo-ganoderic acid Z	PMID:17050181 PMID:24654802 PMID:25975187
795	Ganoderma lucidum	MSID000311	9-Hydroxycerevistero	PMID:25975187
796	Ganoderma lucidum	MSID000452	Butyl ganoderate A	PMID:20039640 PMID:25975187
797	Ganoderma lucidum	MSID000453	Butyl ganoderate B	PMID:20039640 PMID:25975187
798	Ganoderma lucidum	MSID000454	Butyl lucidenate A	PMID:20039640 PMID:25975187
799	Ganoderma lucidum	MSID000455	Butyl lucidenate D2	PMID:23357630 PMID:25975187
800	Ganoderma lucidum	MSID000456	Butyl lucidenate E2	PMID:23357630 PMID:25975187
801	Ganoderma lucidum	MSID000457	Butyl lucidenate P	PMID:23357630 PMID:25975187
802	Ganoderma lucidum	MSID000458	Butyl lucidenate Q	PMID:23357630 PMID:25975187
803	Ganoderma lucidum	MSID000459	Ganoderic acid T	PMID:28845771 PMID:30317980 PMID:29534044 PMID:20077112 DOI:10.1248/cpb.34.2282 DOI:10.22159/ajpcr.2019.v12i4.32124
804	Ganoderma lucidum	MSID000460	Lanosta-7,9(11),24-trien-3b,15 a ,22b-triacetoxy-26-oic acid	PMID:25975187
805	Ganoderma lucidum	MSID000499	Colossolactone A	PMID:30123634
806	Ganoderma lucidum	MSID000500	Colossolactone G	PMID:30123634
807	Ganoderma lucidum	MSID000501	Colossolactone V	PMID:30123634
808	Ganoderma lucidum	MSID000502	Colossolactone VII	PMID:30123634
809	Ganoderma lucidum	MSID000503	Colossolactone VIII	PMID:30123634
810	Ganoderma lucidum	MSID000505	Compound B9	PMID:25975187
811	Ganoderma lucidum	MSID000586	12b-Hydroxy-3,7,11,15,23-pentaoxo-5 a -lanosta-8-en-26-oic acid	PMID:25975187 PMID:31892211
812	Ganoderma lucidum	MSID000607	Elfvingic acid A	PMID:25975187
813	Ganoderma lucidum	MSID000632	Epoxyganoderiol A	PMID:25975187
814	Ganoderma lucidum	MSID000633	Epoxyganoderiol B	PMID:25975187
815	Ganoderma lucidum	MSID000634	Epoxyganoderiol C	PMID:25975187
816	Ganoderma lucidum	MSID000636	Ergosta-4,7,22-triene-3,6-dione	PMID:25975187
817	Ganoderma lucidum	MSID000642	5,6-Dihydroergosterol	PMID:25975187 PMID:30837881
818	Ganoderma lucidum	MSID000646	Ergosta-7,22-diene-3beta-yl pentadecanoa	PMID:16356517
819	Ganoderma lucidum	MSID000703	Ethyl 3-O-acetylganoderate B	DOI:10.1002/hlca.200900028 PMID:25975187
820	Ganoderma lucidum	MSID000705	Ethyl ganoderate J	DOI:10.1002/hlca.200900028 PMID:25975187
821	Ganoderma lucidum	MSID000706	Ethyl lucidenate A	PMID:25975187 DOI:10.22159/ajpcr.2019.v12i4.32124
822	Ganoderma lucidum	MSID000815	Ganoderal A	PMID:25975187
823	Ganoderma lucidum	MSID000816	Ganoderal B	PMID:25975187
824	Ganoderma lucidum	MSID000818	Ganoderenic acid A	PMID:25975187 DOI:10.1016/0031-9422(89)85036-8
825	Ganoderma lucidum	MSID000819	Ganoderenic acid B	DOI:10.1248/cpb.33.4829 PMID:25975187 PMID:30317980
826	Ganoderma lucidum	MSID000820	Ganoderenic acid C	PMID:25975187
827	Ganoderma lucidum	MSID000821	Ganoderenic acid D	PMID:25975187
828	Ganoderma lucidum	MSID000822	Ganoderenic acid E	PMID:25975187
829	Ganoderma lucidum	MSID000823	Ganoderenic acid F	DOI:10.1248/cpb.33.4829
830	Ganoderma lucidum	MSID000827	Ganoderic acid A	DOI:10.1002/hlca.19820650221 PMID:27910768 PMID:30317980 PMID:29534044 PMID:30806265 ISBN:978-981-13-6381-8 PMID:25975187 DOI:10.22159/ajpcr.2019.v12i4.32124
831	Ganoderma lucidum	MSID000829	Ganoderic acid alpha	DOI:10.1016/s0031-9422(98)00254-4 PMID:27910768
832	Ganoderma lucidum	MSID000831	Ganoderic acid AP3	PMID:25975187
833	Ganoderma lucidum	MSID000832	Ganoderic acid B	PMID:27910768 PMID:30317980 PMID:29534044 PMID:25975187 PMID:29256841 DOI:10.22159/ajpcr.2019.v12i4.32124
834	Ganoderma lucidum	MSID000833	Ganoderic acid beta	PMID:29534044 PMID:9810695 PMID:25975187 DOI:10.22159/ajpcr.2019.v12i4.32124
835	Ganoderma lucidum	MSID000834	Ganoderic acid C6	PMID:27910768 PMID:25975187
836	Ganoderma lucidum	MSID000835	Ganoderic acid DF	PMID:20603199 PMID:25975187
837	Ganoderma lucidum	MSID000836	Ganoderic acid DM	PMID:29534044 DOI:10.5281/zenodo.3541258 PMID:25975187 PMID:30317980
838	Ganoderma lucidum	MSID000837	Ganoderic acid E	PMID:25975187 DOI:10.1248/cpb.33.2624 DOI:10.22159/ajpcr.2019.v12i4.32124
839	Ganoderma lucidum	MSID000838	Ganoderic acid F	PMID:29534044 PMID:25975187 PMID:30317980 DOI:10.22159/ajpcr.2019.v12i4.32124
840	Ganoderma lucidum	MSID000839	Ganoderic acid G	DOI:10.1248/cpb.33.2628 PMID:27910768 PMID:25975187 PMID:30317980
841	Ganoderma lucidum	MSID000843	Ganoderic acid H	PMID:27910768 PMID:29534044 PMID:25975187 DOI:10.1248/cpb.33.2624 DOI:10.22159/ajpcr.2019.v12i4.32124
842	Ganoderma lucidum	MSID000844	Ganoderic acid I	DOI:10.1248/cpb.33.2628 PMID:25975187
843	Ganoderma lucidum	MSID000845	Ganoderic acid J	PMID:25975187
844	Ganoderma lucidum	MSID000848	Ganoderic acid K	PMID:3021351 PMID:25975187
845	Ganoderma lucidum	MSID000849	Ganoderic acid L	PMID:25975187
846	Ganoderma lucidum	MSID000850	Ganoderic acid LM2	PMID:25975187 PMID:17708623
847	Ganoderma lucidum	MSID000851	Ganoderic acid M	PMID:25975187
848	Ganoderma lucidum	MSID000852	Ganoderic acid D1	PMID:25975187
849	Ganoderma lucidum	MSID000853	Ganoderic acid MA	PMID:25975187
850	Ganoderma lucidum	MSID000854	Ganoderic acid MC	PMID:29534044 PMID:25975187 DOI:10.22159/ajpcr.2019.v12i4.32124
851	Ganoderma lucidum	MSID000855	Ganoderic acid MD	PMID:25975187
852	Ganoderma lucidum	MSID000856	Ganoderic acid ME	PMID:28845771 PMID:29534044 PMID:20077112 PMID:18946196 PMID:25975187 PMID:29256841 DOI:10.22159/ajpcr.2019.v12i4.32124
853	Ganoderma lucidum	MSID000857	Ganodermic acid R	DOI:10.1021/np50053a019
854	Ganoderma lucidum	MSID000858	Ganodermic acid S	DOI:10.1021/np50053a019 DOI:10.22159/ajpcr.2019.v12i4.32124
855	Ganoderma lucidum	MSID000859	Ganoderic acid MG	PMID:25975187
856	Ganoderma lucidum	MSID000860	Ganoderic acid MI	PMID:25975187
857	Ganoderma lucidum	MSID000861	Ganoderic acid MJ	PMID:25975187
858	Ganoderma lucidum	MSID000862	Ganoderic acid N	PMID:25975187
859	Ganoderma lucidum	MSID000863	Ganoderic acid R	PMID:29534044 DOI:10.1248/cpb.34.2282 DOI:10.22159/ajpcr.2019.v12i4.32124
860	Ganoderma lucidum	MSID000864	Ganoderic acid T-N	PMID:25975187
861	Ganoderma lucidum	MSID000865	Ganoderic acid X	PMID:29534044 DOI:10.1016/s0040-4039(00)81610-x PMID:25975187
862	Ganoderma lucidum	MSID000866	Ganoderic acid T-Q	PMID:24654802 PMID:25975187 PMID:21401205 DOI:10.22159/ajpcr.2019.v12i4.32124
863	Ganoderma lucidum	MSID000867	Ganoderic acid TR	PMID:29749562 PMID:25975187 PMID:16962782
864	Ganoderma lucidum	MSID000868	Ganoderic acid TR1	PMID:29749562 PMID:25975187
865	Ganoderma lucidum	MSID000869	Ganoderic acid-V1	PMID:25975187 DOI:10.1016/0031-9422(93)85523-t
866	Ganoderma lucidum	MSID000870	Ganoderic acid W	PMID:25975187
867	Ganoderma lucidum	MSID000871	Ganoderique acid W	DOI:10.1016/s0040-4039(00)81610-x
868	Ganoderma lucidum	MSID000875	Ganoderic acid Y	DOI:10.1016/s0040-4039(00)81610-x PMID:25975187 DOI:10.22159/ajpcr.2019.v12i4.32124
869	Ganoderma lucidum	MSID000876	Ganoderic acid Z	DOI:10.1002/chin.200050187 PMID:25975187 PMID:17708623 DOI:10.22159/ajpcr.2019.v12i4.32124
870	Ganoderma lucidum	MSID000877	Ganoderic acid γ	DOI:10.1002/chin.200050187 PMID:17708623 DOI:10.22159/ajpcr.2019.v12i4.32124
871	Ganoderma lucidum	MSID000878	Ganoderic acid δ	DOI:10.1002/chin.200050187 PMID:17708623 DOI:10.22159/ajpcr.2019.v12i4.32124
872	Ganoderma lucidum	MSID000879	Ganoderic acid ε	DOI:10.1002/chin.200050187 PMID:17708623 DOI:10.22159/ajpcr.2019.v12i4.32124
873	Ganoderma lucidum	MSID000880	Ganoderic acid η	DOI:10.1002/chin.200050187 PMID:17708623 DOI:10.22159/ajpcr.2019.v12i4.32124
874	Ganoderma lucidum	MSID000881	Ganoderic acid θ	PMID:10923835 PMID:17708623
875	Ganoderma lucidum	MSID000882	Ganoderic acid σ	DOI:10.1016/j.tetlet.2016.10.072
876	Ganoderma lucidum	MSID000883	Ganoderic acid-AM1	PMID:25975187
877	Ganoderma lucidum	MSID000884	Ganoderic acid-MK	PMID:29534044 PMID:20077112 DOI:10.22159/ajpcr.2019.v12i4.32124
878	Ganoderma lucidum	MSID000885	Ganoderic aldehyde A	PMID:25975187
879	Ganoderma lucidum	MSID000886	Ganoderic aldehyde TR	PMID:20384295 PMID:29749562
880	Ganoderma lucidum	MSID000887	Ganoderiol A	PMID:31109134 PMID:27910768 PMID:25975187 DOI:10.1271/bbb1961.50.2887
881	Ganoderma lucidum	MSID000888	Ganoderiol B	PMID:30317980 DOI:10.1271/bbb1961.50.2887
882	Ganoderma lucidum	MSID000889	Ganoderiol C	DOI:10.1080/00021369.1988.10868655 PMID:25975187
883	Ganoderma lucidum	MSID000890	Ganoderiol D	DOI:10.1080/00021369.1988.10868655 PMID:25975187
884	Ganoderma lucidum	MSID000891	Ganoderiol E	DOI:10.1080/00021369.1988.10868655 PMID:25975187 DOI:10.22159/ajpcr.2019.v12i4.32124
885	Ganoderma lucidum	MSID000892	Ganoderiol F	PMID:27910768 DOI:10.22159/ajpcr.2019.v12i4.32124
886	Ganoderma lucidum	MSID000893	Ganoderiol G	DOI:10.1080/00021369.1988.10868655 PMID:25975187
887	Ganoderma lucidum	MSID000894	Ganoderiol H	DOI:10.1080/00021369.1988.10868655 PMID:25975187
888	Ganoderma lucidum	MSID000895	Ganoderiol I	DOI:10.1080/00021369.1988.10868655 PMID:25975187
889	Ganoderma lucidum	MSID000896	Ganoderique acid Z	DOI:10.1016/s0040-4039(00)81610-x
890	Ganoderma lucidum	MSID000897	Ganoderlactone A	PMID:26222905
891	Ganoderma lucidum	MSID000898	Ganoderlactone B	PMID:26222905
892	Ganoderma lucidum	MSID000899	Ganoderlactone D	PMID:26222905
893	Ganoderma lucidum	MSID000900	Ganoderlactone E	PMID:26222905
894	Ganoderma lucidum	MSID000902	Ganoderol B	PMID:3783158 PMID:24940906 DOI:10.22159/ajpcr.2019.v12i4.32124
895	Ganoderma lucidum	MSID000903	Ganodermanondiol	DOI:10.1021/np50048a029 PMID:27910768 PMID:27801787 PMID:29534044 PMID:25975187 PMID:29749562 DOI:10.22159/ajpcr.2019.v12i4.32124
896	Ganoderma lucidum	MSID000904	Ganodermanontriol	PMID:21225227 DOI:10.1021/np50048a029 PMID:27910768 PMID:30317980 PMID:29534044 PMID:25975187 DOI:10.22159/ajpcr.2019.v12i4.32124
897	Ganoderma lucidum	MSID000905	Ganodermaside A	PMID:20093034 PMID:25975187
898	Ganoderma lucidum	MSID000906	Ganodermaside B	PMID:20093034 PMID:25975187
899	Ganoderma lucidum	MSID000907	Ganodermaside C	PMID:25975187
900	Ganoderma lucidum	MSID000908	Ganodermaside D	PMID:25975187
901	Ganoderma lucidum	MSID000910	Ganodermatriol	PMID:3783158 PMID:24654802 PMID:27910768 PMID:25975187
902	Ganoderma lucidum	MSID000911	Ganodermenonol	PMID:3783158 DOI:10.22159/ajpcr.2019.v12i4.32124
903	Ganoderma lucidum	MSID000912	Ganoderol A	DOI:10.22159/ajpcr.2019.v12i4.32124
904	Ganoderma lucidum	MSID000914	Ganodernoid A	PMID:26222905
905	Ganoderma lucidum	MSID000915	Ganodernoid C	PMID:26222905
906	Ganoderma lucidum	MSID000916	Ganodernoid D	PMID:26222905
907	Ganoderma lucidum	MSID000917	Ganodernoid E	PMID:26222905
908	Ganoderma lucidum	MSID000918	Ganodernoid F	PMID:26222905
909	Ganoderma lucidum	MSID000919	Ganodernoid G	PMID:26222905
910	Ganoderma lucidum	MSID000920	Ganoderone A	PMID:25975187
911	Ganoderma lucidum	MSID000922	Ganodone	PMID:25975187
912	Ganoderma lucidum	MSID000923	Ganofuran B	PMID:20384295 PMID:25975187
913	Ganoderma lucidum	MSID000942	Ganolucidic acid A	PMID:27910768 PMID:29534044 PMID:24654802 PMID:25975187 DOI:10.1248/cpb.33.2628 DOI:10.22159/ajpcr.2019.v12i4.32124
914	Ganoderma lucidum	MSID000943	Ganolucidic acid B	PMID:25975187
915	Ganoderma lucidum	MSID000944	Ganolucidic acid C	PMID:25975187
916	Ganoderma lucidum	MSID000945	Ganolucidic acid D	PMID:25975187
917	Ganoderma lucidum	MSID000946	Ganolucidic acid E	DOI:10.1080/00021369.1988.10868655 PMID:25975187
918	Ganoderma lucidum	MSID000968	Ganosporelactone A	PMID:25975187
919	Ganoderma lucidum	MSID000969	Ganosporeric acid A	DOI:10.1615/intjmedmushrooms.v1.i2.40 PMID:25975187 DOI:10.22159/ajpcr.2019.v12i4.32124
920	Ganoderma lucidum	MSID001103	L-ergothioneine	ISBN:978-981-13-6381-8
921	Ganoderma lucidum	MSID001127	Lovastatin	PMID:24941169
922	Ganoderma lucidum	MSID001128	Lucialdehyde A	DOI:10.1007/10_2008_26 PMID:17708623 DOI:10.22159/ajpcr.2019.v12i4.32124
923	Ganoderma lucidum	MSID001129	Lucialdehyde B	DOI:10.1007/10_2008_26 PMID:17708623 PMID:25975187 PMID:12045343 DOI:10.22159/ajpcr.2019.v12i4.32124
924	Ganoderma lucidum	MSID001130	Lucialdehyde C	DOI:10.1007/10_2008_26 PMID:17708623 DOI:10.1021/np990295y PMID:25975187 DOI:10.22159/ajpcr.2019.v12i4.32124
925	Ganoderma lucidum	MSID001132	Lucialdehyde E	PMID:25975187 DOI:10.22159/ajpcr.2019.v12i4.32124
926	Ganoderma lucidum	MSID001133	Lucidadiol	DOI:10.1021/np990295y PMID:25975187 DOI:10.22159/ajpcr.2019.v12i4.32124
927	Ganoderma lucidum	MSID001134	Lucidenic acid A	PMID:29534044 PMID:20615519 PMID:25975187 DOI:10.22159/ajpcr.2019.v12i4.32124
928	Ganoderma lucidum	MSID001135	Lucidenic acid B	PMID:29534044 PMID:18481862 PMID:25975187 DOI:10.22159/ajpcr.2019.v12i4.32124
929	Ganoderma lucidum	MSID001136	Lucidenic acid E1	PMID:25975187
930	Ganoderma lucidum	MSID001137	Lucidenic acid C	DOI:10.1248/cpb.33.4829 PMID:25975187 DOI:10.22159/ajpcr.2019.v12i4.32124
931	Ganoderma lucidum	MSID001138	Lucidenic acid D	DOI:10.1248/cpb.33.4829 PMID:25975187
932	Ganoderma lucidum	MSID001139	Lucidenic acid D1	PMID:25975187
933	Ganoderma lucidum	MSID001140	Lucidenic acid E2	PMID:25975187
934	Ganoderma lucidum	MSID001141	Lucidenic acid F	PMID:25975187
935	Ganoderma lucidum	MSID001142	Lucidenic acid G	PMID:25975187
936	Ganoderma lucidum	MSID001143	Lucidenic acid H	PMID:25975187
937	Ganoderma lucidum	MSID001144	Lucidenic acid I	PMID:25975187
938	Ganoderma lucidum	MSID001145	Lucidenic acid J	PMID:25975187
939	Ganoderma lucidum	MSID001146	Lucidenic acid K	PMID:25975187
940	Ganoderma lucidum	MSID001147	Lucidenic acid L	PMID:25975187
941	Ganoderma lucidum	MSID001148	Lucidenic acid LM1	DOI:10.1007/10_2008_26 PMID:17708623 PMID:25975187 PMID:11520245 DOI:10.22159/ajpcr.2019.v12i4.32124
942	Ganoderma lucidum	MSID001149	Lucidenic acid M	PMID:25975187
943	Ganoderma lucidum	MSID001150	Lucidenic acid P	PMID:25975187 PMID:17708623
944	Ganoderma lucidum	MSID001151	Lucidimine A	PMID:26666338
945	Ganoderma lucidum	MSID001152	Lucidimine B	PMID:26666338
946	Ganoderma lucidum	MSID001153	Lucidimine C	PMID:26666338
947	Ganoderma lucidum	MSID001154	Lucidimine D	PMID:26666338
948	Ganoderma lucidum	MSID001156	Lucidulactone A	PMID:25295637
949	Ganoderma lucidum	MSID001157	Lucidulactone B	PMID:25295637
950	Ganoderma lucidum	MSID001158	Lucidumol A	PMID:9810695 PMID:27910768 PMID:25975187
951	Ganoderma lucidum	MSID001159	Lucidumol B	PMID:29534044 PMID:27910768 PMID:25975187 DOI:10.22159/ajpcr.2019.v12i4.32124
952	Ganoderma lucidum	MSID001184	Methyl ganoderate A	PMID:24654802 PMID:25975187 DOI:10.22159/ajpcr.2019.v12i4.32124
953	Ganoderma lucidum	MSID001185	Methyl ganoderate A acetonide	PMID:21924611 PMID:25975187 ISBN:978-981-13-6381-8
954	Ganoderma lucidum	MSID001186	Methyl ganoderate B	PMID:25975187 PMID:24654802 DOI:10.22159/ajpcr.2019.v12i4.32124
955	Ganoderma lucidum	MSID001187	Methyl ganoderate E	PMID:25975187
956	Ganoderma lucidum	MSID001188	Methyl ganoderate F	PMID:25975187
957	Ganoderma lucidum	MSID001189	Methyl ganoderate H	PMID:25975187
958	Ganoderma lucidum	MSID001190	Methyl ganoderate J	DOI:10.1080/00021369.1985.10867324 PMID:25975187
959	Ganoderma lucidum	MSID001192	Methyl lucidenate D 2	PMID:25975187
960	Ganoderma lucidum	MSID001193	Methyl lucidenate F	PMID:11520245 DOI:10.1007/10_2008_26 PMID:17708623
961	Ganoderma lucidum	MSID001195	Methyl lucidenate P	PMID:14695801 PMID:25975187 PMID:17708623
962	Ganoderma lucidum	MSID001196	Methyl lucidenate Q	PMID:14695801 PMID:25975187 PMID:17708623
963	Ganoderma lucidum	MSID001207	N-butyl ganoderate H	PMID:25975187 ISBN:978-981-13-6381-8 DOI:10.22159/ajpcr.2019.v12i4.32124
964	Ganoderma lucidum	MSID001383	Schisanlactone A	PMID:30123634
965	Ganoderma lucidum	MSID001484	12-Acetoxy ganoderic acid D	PMID:25975187
966	Ganoderma lucidum	MSID001485	12-Hydroxy ganoderic acid C2	PMID:25975187
967	Ganoderma lucidum	MSID001486	12,15-Bis(acetyloxy)-3-hydroxy-7,11,23-trioxo-lanost-8-en-26-oic acid	PMID:25975187
968	Ganoderma lucidum	MSID001497	20-Hydroxy ganoderic acid AM 1	PMID:25975187
969	Ganoderma lucidum	MSID001503	3-O-acetyl ganoderic acid B	PMID:25975187
970	Ganoderma lucidum	MSID001512	3a,22b-Diacetoxy-7a -hydroxyl-5a-lanost-8,24e-dien-26-oic acid	PMID:25975187
971	Ganoderma lucidum	MSID001515	3b,15a ,22b-Trihydroxylanosta-7,9(11),24-trien-26-oic acid	PMID:25975187
972	Ganoderma lucidum	MSID001517	3b,7b-Dihydroxy-11,15,23-trioxo-lanost-8,16-dien-26-oic acid	PMID:25975187
973	Ganoderma lucidum	MSID001518	3b,7b-Dihydroxy-11,15,23-trioxo-lanost-8,16-dien-26-oic acid methyl ester	PMID:25975187
974	Ganoderma lucidum	MSID001519	3b,7b-Dihydroxy-12b-acetoxy-11,15,23-trioxo-5 a -lanosta-8-en-26-oic acid methyl ester	PMID:25975187
975	Ganoderma lucidum	MSID001525	4,4,14 a -Trimethyl-5 a -chol-7,9(11)-dien-3-oxo-24-oic acid	PMID:24654802 PMID:25975187
976	Ganoderma lucidum	MSID001530	7-O-methyl ganoderic acid O	PMID:25975187
977	Ganoderma lucidum	MSID001534	8 a ,9 a -Epoxy-3,7,11,15,23-pentaoxo-5 a -lanosta-26-oic acid	PMID:25975187
978	Ganoderma lucidum	MSID001585	Ganoderenic acid K	PMID:25975187
979	Ganoderma lucidum	MSID001589	Ganoderic acid MH	PMID:25975187
980	Ganoderma lucidum	MSID001594	Ganoderitriol M	PMID:25975187
981	Ganoderma lucidum	MSID001604	Lanosta-7,9(11),24-trien-15 a -acetoxy-3 a -hydroxy-23-oxo-26-oic acid	PMID:25975187
982	Ganoderma lucidum	MSID001605	Lanosta-7,9(11),24-trien-3 a -acetoxy-15 a -hydroxy-23-oxo-26-oic acid	PMID:25975187
983	Ganoderma lucidum	MSID001606	Lanosta-7,9(11),24-trien-3 a -acetoxy-15 a ,22b-dihydroxy-26-oic acid	PMID:25975187
984	Ganoderma lucidum	MSID001607	Lanosta-7,9(11),24-trien-3a,15a-diacetoxy-23-oxo-26-oic acid	PMID:25975187
985	Ganoderma lucidum	MSID001610	Lucidenic lactone	PMID:17708623 DOI:10.22159/ajpcr.2019.v12i4.32124
986	Ganoderma lucidum	MSID001611	Methyl 20(21)-dehydrolucidenate A	PMID:15844948 PMID:25975187
987	Ganoderma lucidum	MSID001615	Methyl-O-acetyl ganoderate C	PMID:25975187
988	Ganoderma lucidum	MSID001631	Spirolingzhine A	ISBN:978-981-13-6381-8
989	Ganoderma lucidum	MSID001633	t-Butyl lucidenate B	PMID:25975187 DOI:10.22159/ajpcr.2019.v12i4.32124
990	Ganoderma lucidum	MSID001636	Ganoderic acid O	PMID:25975187
991	Ganoderma lucidum	MSID001637	Ganoderic acid Q	PMID:25975187
992	Ganoderma lucidum	MSID001643	Ganodermic acid P2	PMID:25975187
993	Ganoderma lucidum	MSID001644	Ganoderic acid P	PMID:25975187
994	Ganoderma lucidum	MSID001645	Ganoderic acid MF	PMID:29534044 PMID:25975187 DOI:10.22159/ajpcr.2019.v12i4.32124
995	Ganoderma lucidum	MSID001646	Ganodermic acid T-O	PMID:25975187
996	Ganoderma lucidum	MSID001648	Ganoderic acid U	DOI:10.1016/s0040-4039(00)81610-x PMID:25975187
997	Ganoderma lucidum	MSID001649	Ganoderic acid C2	DOI:10.1248/cpb.34.3695 PMID:27910768 PMID:25975187 PMID:30317980
998	Ganoderma lucidum	MSID001660	Methyl ganoderate C	PMID:25975187
999	Ganoderma lucidum	MSID001682	11 a -Hydroxy-3,7-dioxo-5 a -lanosta-8,24(e)-dien-26-oic acid	PMID:25975187
1000	Ganoderma lucidum	MSID001683	11b-Hydroxy-3,7-dioxo-5 a -lanosta-8,24(e)-dien-26-oic acid	PMID:25975187
1001	Ganoderma lucidum	MSID001690	15-Hydroxy-ganoderic acid S	PMID:17050181 PMID:25975187
1002	Ganoderma lucidum	MSID001691	Ganodermic acid JB	PMID:25975187
1003	Ganoderma lucidum	MSID001692	Ganodermic acid JA	PMID:25975187
1004	Ganoderma lucidum	MSID001700	20-Hydroxylganoderic acid G	PMID:11809071 PMID:25975187 PMID:17708623
1005	Ganoderma lucidum	MSID001706	Ganoderic acid C1	PMID:27910768 PMID:30317980 PMID:29534044 DOI:10.1248/cpb.33.4829 PMID:25975187 DOI:10.1248/cpb.33.2624 DOI:10.22159/ajpcr.2019.v12i4.32124
1006	Ganoderma lucidum	MSID001735	Methyl 8b,9a-dihydroganoderic acid J	PMID:25975187 PMID:17708623
1007	Ganoderma lucidum	MSID001740	12b-Acetoxy-3,7,11,15,23-pentaoxo-5 a -lanosta-8-en-26-oic acid ethyl ester	PMID:25975187
1008	Ganoderma lucidum	MSID001744	8b,9 a -Dihydroganoderic acid J	PMID:25975187 PMID:17708623
1009	Ganoderma lucidum	MSID001745	12b-Acetoxy-3b,7b-dihydroxy-11,15,23-trioxo-lanost-8,16-dien-26-oic acid	PMID:25975187
1010	Ganoderma lucidum	MSID001746	Ganodernoid B	PMID:26222905
1011	Ganoderma lucidum	MSID001748	12b-Acetoxy-7b-hydroxy-3,11,15,23-tetraoxo-5 a -lanosta-8,20-dien-26-oic acid	PMID:25975187
1012	Ganoderma lucidum	MSID001749	22E,24R-ergosta-7,22-diene-3b,5 a ,6b,9 a ,14 a -pentol	PMID:25975187
1013	Ganoderma lucidum	MSID001752	4,4,14 a -Trimethyl-3,7-dioxo-5 a -chol-8-en-24-oic acid	PMID:25975187
1014	Ganoderma lucidum	MSID001756	12b-Acetoxy-3b,7b-dihydroxy-11,15,23-trioxolanost-8-en-26-oic acid butyl ester	PMID:25975187
1015	Ganoderma lucidum	MSID001759	12b-Acetoxy-3,7,11,15,23-pentaoxolanost-8-en-26-oic acid butyl ester	PMID:25975187
1016	Ganoderma lucidum	MSID001768	8b,9 a -Dihydroganoderic acid C	PMID:25975187
1017	Ganoderma lucidum	MSID001776	Ganoderic acid S	PMID:30317980 PMID:29534044 PMID:20077112 PMID:24654802 PMID:17708623 DOI:10.1248/cpb.34.2282 PMID:25975187 PMID:29749562 DOI:10.22159/ajpcr.2019.v12i4.32124
1018	Ganoderma lucidum	MSID001806	20(21)-Dehydrolucidenic acid A	PMID:15844948
1019	Ganoderma lucidum	MSID001808	3α,15α,22α-Trihydroxylanosta-7,9(11),24-trien-26-oic acid	PMID:25975187 PMID:21401205
1020	Ganoderma lucidum	MSID001810	Butyl lucidenate N	PMID:25975187
1021	Ganoderma lucidum	MSID001811	N-butyl lucidenate N	PMID:20039640
1022	Ganoderma lucidum	MSID001812	Ganoderic acid V	PMID:25975187
1023	Ganoderma lucidum	MSID001813	Ganoderique acid V	DOI:10.1016/s0040-4039(00)81610-x
1024	Ganoderma lucidum	MSID001816	6-Dehydrocerevisterol	PMID:25975187
1025	Ganoderma lucidum	MSID001817	beta-Sitosterol	PMID:25975187
1026	Ganoderma lucidum	MSID001818	22,23-Dihydroergosterol	PMID:25975187
1027	Ganoderma lucidum	MSID001826	Lucidenic acid O	PMID:25975187 PMID:17708623 DOI:10.22159/ajpcr.2019.v12i4.32124
1028	Ganoderma neojaponicum	MSID000542	Cryptoporic acid H	PMID:25975187
1029	Ganoderma neojaponicum	MSID000543	Cryptoporic acid I	PMID:25975187
1030	Ganoderma orbiforme	MSID000459	Ganoderic acid T	PMID:25975187
1031	Ganoderma orbiforme	MSID000776	Fornicatin A	PMID:25975187 DOI:10.1016/j.tetlet.2004.02.056
1032	Ganoderma orbiforme	MSID000777	Fornicatin B	PMID:25975187 DOI:10.1016/j.tetlet.2004.02.056
1033	Ganoderma orbiforme	MSID000778	Fornicatin C	DOI:10.1002/hlca.200690081 PMID:25975187
1034	Ganoderma orbiforme	MSID000782	Fornicin A	PMID:16989537 PMID:25975187
1035	Ganoderma orbiforme	MSID000783	Fornicin B	PMID:16989537 PMID:25975187
1036	Ganoderma orbiforme	MSID000784	Fornicin C	PMID:16989537 PMID:25975187
1037	Ganoderma orbiforme	MSID000804	Ganoboninketal A	PMID:29749562 PMID:25975187 PMID:25076059
1038	Ganoderma orbiforme	MSID000805	Ganoboninketal B	PMID:29749562 PMID:25975187 PMID:25076059
1039	Ganoderma orbiforme	MSID000806	Ganoboninketal C	PMID:29749562 PMID:25975187 PMID:25076059
1040	Ganoderma orbiforme	MSID000807	Ganoboninone B	DOI:10.1016/j.tet.2015.02.002
1041	Ganoderma orbiforme	MSID000808	Ganoboninone C	DOI:10.1016/j.tet.2015.02.002
1042	Ganoderma orbiforme	MSID000809	Ganoboninone D	DOI:10.1016/j.tet.2015.02.002
1043	Ganoderma orbiforme	MSID000810	Ganoboninone E	DOI:10.1016/j.tet.2015.02.002
1044	Ganoderma orbiforme	MSID000863	Ganoderic acid R	PMID:25975187
1045	Ganoderma orbiforme	MSID000865	Ganoderic acid X	PMID:25975187
1046	Ganoderma orbiforme	MSID000947	Ganomastenol A	PMID:25975187 DOI:10.1016/0031-9422(95)00225-v
1047	Ganoderma orbiforme	MSID000948	Ganomastenol B	PMID:25975187 DOI:10.1016/0031-9422(95)00225-v
1048	Ganoderma orbiforme	MSID000949	Ganomastenol C	PMID:25975187 DOI:10.1016/0031-9422(95)00225-v
1049	Ganoderma orbiforme	MSID000950	Ganomastenol D	PMID:25975187 DOI:10.1016/0031-9422(95)00225-v
1050	Ganoderma orbiforme	MSID000953	Ganorbiformin A	PMID:25975187
1051	Ganoderma orbiforme	MSID000954	Ganorbiformin B	PMID:25975187
1052	Ganoderma orbiforme	MSID000955	Ganorbiformin C	PMID:25975187
1053	Ganoderma orbiforme	MSID000956	Ganorbiformin D	PMID:25975187
1054	Ganoderma orbiforme	MSID000957	Ganorbiformin E	PMID:25975187
1055	Ganoderma orbiforme	MSID000958	Ganorbiformin F	PMID:25975187
1056	Ganoderma orbiforme	MSID000959	Ganorbiformin G	PMID:25975187
1057	Ganoderma orbiforme	MSID001530	7-O-methyl ganoderic acid O	PMID:25975187
1058	Ganoderma orbiforme	MSID001644	Ganoderic acid P	PMID:25975187
1059	Ganoderma orbiforme	MSID001766	Ganoboninone A	DOI:10.1016/j.tet.2015.02.002
1060	Ganoderma orbiforme	MSID001769	Ganoboninone F	DOI:10.1016/j.tet.2015.02.002
1061	Ganoderma orbiforme	MSID001776	Ganoderic acid S	PMID:25975187
1062	Ganoderma orbiforme	MSID001812	Ganoderic acid V	PMID:25975187
1063	Ganoderma pfeifferi	MSID000379	Applanoxidic acid A	PMID:25975187
1064	Ganoderma pfeifferi	MSID000383	Applanoxidic acid G	PMID:25975187 DOI:10.22159/ajpcr.2019.v12i4.32124
1065	Ganoderma pfeifferi	MSID000642	5,6-Dihydroergosterol	PMID:25975187
1066	Ganoderma pfeifferi	MSID000920	Ganoderone A	PMID:16378363 DOI:10.22159/ajpcr.2019.v12i4.32124
1067	Ganoderma pfeifferi	MSID000921	Ganoderone C	PMID:16378363 PMID:25975187 DOI:10.22159/ajpcr.2019.v12i4.32124
1068	Ganoderma pfeifferi	MSID000951	Ganomycin A	PMID:10757736 PMID:25975187
1069	Ganoderma pfeifferi	MSID000952	Ganomycin B	PMID:10757736 PMID:25975187
1070	Ganoderma pfeifferi	MSID001129	Lucialdehyde B	DOI:10.22159/ajpcr.2019.v12i4.32124
1071	Ganoderma pfeifferi	MSID001131	Lucialdehyde D	PMID:16378363 PMID:25975187 DOI:10.22159/ajpcr.2019.v12i4.32124
1072	Ganoderma pfeifferi	MSID001133	Lucidadiol	DOI:10.22159/ajpcr.2019.v12i4.32124
1073	Ganoderma resinaceum	MSID000239	3a-(3-Hydroxy-5-methoxy-3-methyl-1,5-dioxopentyloxy)-24-methylene-5 a -lanost-8-en-21-oic acid	PMID:25975187 DOI:10.1080/10286020600979910
1074	Ganoderma resinaceum	MSID000301	7-Oxo-ganoderic acid Z	PMID:25975187
1075	Ganoderma resinaceum	MSID000825	Resinacein K	PMID:29490285
1076	Ganoderma resinaceum	MSID000826	Ganoderesin B	PMID:25975187
1077	Ganoderma resinaceum	MSID000872	Ganoderic acid XL3	PMID:29490285
1078	Ganoderma resinaceum	MSID000875	Ganoderic acid Y	PMID:25975187
1079	Ganoderma resinaceum	MSID001338	Resinacein A	PMID:29490285
1080	Ganoderma resinaceum	MSID001339	Resinacein B	PMID:29490285
1081	Ganoderma resinaceum	MSID001340	Resinacein C	PMID:29490285
1082	Ganoderma resinaceum	MSID001341	Resinacein E	PMID:29490285
1083	Ganoderma resinaceum	MSID001342	Resinacein F	PMID:29490285
1084	Ganoderma resinaceum	MSID001343	Resinacein G	PMID:29490285
1085	Ganoderma resinaceum	MSID001344	Resinacein H	PMID:29490285
1086	Ganoderma resinaceum	MSID001345	Resinacein J	PMID:29490285
1087	Ganoderma resinaceum	MSID001346	Resinacein L	PMID:29490285
1088	Ganoderma resinaceum	MSID001347	Resinacein M	PMID:29490285
1089	Ganoderma resinaceum	MSID001348	Resinacein N	PMID:29490285
1090	Ganoderma resinaceum	MSID001349	Resinacein O	PMID:29490285
1091	Ganoderma resinaceum	MSID001350	Resinacein P	PMID:29490285
1092	Ganoderma resinaceum	MSID001351	Resinacein Q	PMID:29490285
1093	Ganoderma resinaceum	MSID001352	Resinacein R	PMID:29490285
1094	Ganoderma resinaceum	MSID001353	Resinacein S	PMID:29490285
1095	Ganoderma resinaceum	MSID001505	3-Oxo-5a-lanosta-8,24-dien-21-oic acid	DOI:10.1080/10286020600979910
1096	Ganoderma resinaceum	MSID001531	7-Oxo-ganoderic acid Z2	PMID:25975187
1097	Ganoderma resinaceum	MSID001532	7-Oxo-ganoderic acid Z3	PMID:25975187
1098	Ganoderma resinaceum	MSID001586	Ganoderesin A	PMID:25975187
1099	Ganoderma resinaceum	MSID001665	Resinacein I	PMID:29490285
1100	Ganoderma resinaceum	MSID001693	3-Epipachymic acid	PMID:25975187 DOI:10.1080/10286020600979910
1101	Ganoderma resinaceum	MSID001695	3a-Acetoxy-16a-hydroxy-24-methylene-5a-lanost-8-en-21-oic acid	DOI:10.1080/10286020600979910
1102	Ganoderma sinense	MSID000192	20-Hydroxy lucidenic acid N	PMID:30123634
1103	Ganoderma sinense	MSID000827	Ganoderic acid A	PMID:25975187
1104	Ganoderma sinense	MSID000832	Ganoderic acid B	PMID:9810695
1105	Ganoderma sinense	MSID000833	Ganoderic acid beta	PMID:25975187
1106	Ganoderma sinense	MSID000837	Ganoderic acid E	PMID:25975187
1107	Ganoderma sinense	MSID000840	Ganoderic acid GS-1	PMID:25975187 PMID:19801861
1108	Ganoderma sinense	MSID000841	Ganoderic acid GS-2	PMID:30123634 PMID:25975187 PMID:19801861
1109	Ganoderma sinense	MSID000842	Ganoderic acid GS-3	PMID:25975187 PMID:19801861
1110	Ganoderma sinense	MSID000846	Ganoderic acid JC	PMID:22161763 PMID:25975187
1111	Ganoderma sinense	MSID000847	Ganoderic acid JD	PMID:22161763 PMID:25975187
1112	Ganoderma sinense	MSID000892	Ganoderiol F	PMID:30123634 PMID:26287401
1113	Ganoderma sinense	MSID000909	Ganodermatetraol	PMID:22161763
1114	Ganoderma sinense	MSID000941	Ganolucidate F	PMID:22161763 PMID:25975187
1115	Ganoderma sinense	MSID000943	Ganolucidic acid B	PMID:25975187
1116	Ganoderma sinense	MSID000944	Ganolucidic acid C	PMID:25975187
1117	Ganoderma sinense	MSID000960	Ganosineniol A	PMID:22161763
1118	Ganoderma sinense	MSID000961	Ganosinensic acid A	PMID:20232901 PMID:25975187
1119	Ganoderma sinense	MSID000962	Ganosinensic acid B	PMID:20232901 PMID:25975187
1120	Ganoderma sinense	MSID000963	Ganosinensin A	PMID:19331378 PMID:25975187
1121	Ganoderma sinense	MSID000964	Ganosinensin B	PMID:19331378 PMID:25975187
1122	Ganoderma sinense	MSID000965	Ganosinensin C	PMID:19331378 PMID:25975187
1123	Ganoderma sinense	MSID000966	Ganosinensine	PMID:22161763 PMID:25975187
1124	Ganoderma sinense	MSID000967	Ganosinoside A	PMID:22161763 PMID:25975187
1125	Ganoderma sinense	MSID001191	Methyl ganosinensate A	PMID:20232901 PMID:25975187
1126	Ganoderma sinense	MSID001194	Methyl lucidenate HA	PMID:22161763 PMID:25975187
1127	Ganoderma sinense	MSID001390	Sinensine	DOI:10.1016/j.cclet.2009.07.023 PMID:25975187
1128	Ganoderma sinense	MSID001504	3-O-acetyl ganoderic acid H	PMID:25975187
1129	Ganoderma sinense	MSID001592	Ganoderiol A triacetate	PMID:25975187
1130	Ganoderma sinense	MSID001593	Ganoderiol J	PMID:25975187
1131	Ganoderma sinense	MSID001596	Ganolucidic acid gamma A	PMID:25975187
1132	Ganoderma sinense	MSID001627	Sinensine B	PMID:25975187
1133	Ganoderma sinense	MSID001628	Sinensine C	PMID:25975187
1134	Ganoderma sinense	MSID001629	Sinensine D	PMID:25975187
1135	Ganoderma sinense	MSID001630	Sinensine E	PMID:25975187
1136	Ganoderma sinense	MSID001807	20(21)-Dehydrolucidenic acid N	PMID:30123634 PMID:25975187 PMID:19801861
1137	Ganoderma theaecola	MSID000062	(-)-Ganotheaecolumol A	DOI:10.1016/j.tet.2018.06.053
1138	Ganoderma theaecola	MSID000063	(-)-Ganotheaecolumol B	DOI:10.1016/j.tet.2018.06.053
1139	Ganoderma theaecola	MSID000064	(-)-Ganotheaecolumol E	DOI:10.1016/j.tet.2018.06.053
1140	Ganoderma theaecola	MSID000065	(+)-Ganotheaecolumol E	DOI:10.1016/j.tet.2018.06.053
1141	Ganoderma theaecola	MSID000066	(-)-Ganotheaecolumol F	DOI:10.1016/j.tet.2018.06.053
1142	Ganoderma theaecola	MSID000067	(-)-Ganotheaecolumol G	DOI:10.1016/j.tet.2018.06.053
1143	Ganoderma theaecola	MSID000068	(+)-Ganotheaecolumol G	DOI:10.1016/j.tet.2018.06.053
1144	Ganoderma theaecola	MSID000069	(-)-Ganotheaecolumol H	DOI:10.1016/j.tet.2018.06.053
1145	Ganoderma theaecola	MSID000070	(+)-Ganotheaecolumol H	DOI:10.1016/j.tet.2018.06.053
1146	Ganoderma theaecola	MSID000834	Ganoderic acid C6	PMID:25975187
1147	Ganoderma theaecola	MSID000872	Ganoderic acid XL3	PMID:28152606
1148	Ganoderma theaecola	MSID000873	Ganoderic acid XL4	PMID:28152606
1149	Ganoderma theaecola	MSID000874	Ganoderic acid XL5	PMID:28152606
1150	Ganoderma theaecola	MSID000970	Ganotheaecolin A	PMID:28124916
1151	Ganoderma theaecola	MSID000971	Ganotheaecolumol I	DOI:10.1016/j.tet.2018.06.053
1152	Ganoderma theaecola	MSID000972	Ganotheaecolumol J	DOI:10.1016/j.tet.2018.06.053
1153	Ganoderma theaecola	MSID000973	Ganotheaecolumol K	DOI:10.1016/j.tet.2018.06.053
1154	Ganoderma theaecola	MSID001583	Ganoderenic acid AM1	PMID:25975187
1155	Ganoderma theaecola	MSID001587	Ganoderesin C	PMID:25975187
1156	Ganoderma theaecola	MSID001590	Ganoderic acid XL 1	PMID:25975187
1157	Ganoderma theaecola	MSID001591	Ganoderic acid XL 2	PMID:25975187
1158	Ganoderma tropicum	MSID000974	Ganotropic acid	PMID:25690289
1159	Ganoderma tropicum	MSID001664	3b,7b,15b-Trihydroxy-11,23-dioxo-lanost-8,16-dien-26-oic acid methyl ester	PMID:23421432 PMID:25975187
1160	Ganoderma tropicum	MSID001741	3β,7β,15α,28-Tetrahydroxy-11,23-dioxo-lanost-8,16-dien-26-oic acid	PMID:25690289
1161	Ganoderma tropicum	MSID001750	26-Nor-11,23-dioxo-5 a -lanost-8-en-3b,7b,15 a ,25-tetrol	DOI:10.1016/j.phytol.2013.09.004 PMID:25975187
1162	Ganoderma tropicum	MSID001761	3β,7β,15α,24-Tetrahydroxy-11,23-dioxolanost-8-en-26-oic acid	PMID:25690289
1163	Ganoderma tropicum	MSID001767	3b,7b,15b-Trihydroxy-11,23-dioxo-lanost-8,16-dien-26-oic acid	PMID:23421432 PMID:25975187
1164	Ganoderma tropicum	MSID001771	3β,15β-Dihydroxy-7,11,23-trioxo-lanost-8,16-dien-26-oic acid methyl ester	PMID:23421432 PMID:25975187
1165	Ganoderma tsugae	MSID000001	Trametenolic acid B	PMID:25975187 DOI:10.22159/ajpcr.2019.v12i4.32124
1166	Ganoderma tsugae	MSID000004	Tsugaric acid D	PMID:25975187
1167	Ganoderma tsugae	MSID000005	Tsugaric acid E	PMID:25975187
1168	Ganoderma tsugae	MSID000101	Tsugaric acid C	PMID:10785428 PMID:25975187
1169	Ganoderma tsugae	MSID000251	Tsugarioside C	PMID:10785428 PMID:25975187
1170	Ganoderma tsugae	MSID000922	Ganodone	PMID:21939217
1171	Ganoderma tsugae	MSID001234	Palmitamide	PMID:26598137
1172	Ganoderma tsugae	MSID001464	Tsugaric acid A	DOI:10.1016/s0031-9422(97)00387-7 PMID:25975187 DOI:10.22159/ajpcr.2019.v12i4.32124
1173	Ganoderma tsugae	MSID001465	Tsugarioside A	PMID:9584403 PMID:25975187 DOI:10.22159/ajpcr.2019.v12i4.32124
1174	Ganoderma tsugae	MSID001505	3-Oxo-5a-lanosta-8,24-dien-21-oic acid	PMID:25975187
1175	Ganoderma tsugae	MSID001506	3-Oxo-5α-lanosta-8-en-21-oic acid	PMID:26598137
1176	Ganoderma tsugae	MSID001507	3,4-Seco-5β-lanosta-7,9(11),4(29)-trien-3,21-dioic acid	PMID:26598137
1177	Ganoderma tsugae	MSID001508	3,4-Seco-5β-lanosta-7,9(11),4(29)-trien-3,21-dioic acid-3-methyl ester	PMID:26598137
1178	Ganoderma tsugae	MSID001509	3,4-Seco-8α,9α-epoxy-5α-lanosta-21-oic acid 3,4 lactone	PMID:26598137
1179	Ganoderma tsugae	MSID001642	Tsugarioside B	PMID:10785428 PMID:25975187
1180	Ganoderma tsugae	MSID001680	Tsugaric acid B	DOI:10.1016/s0031-9422(97)00387-7 PMID:25975187
1181	Ganoderma tsugae	MSID001681	Tsugaric acid F	PMID:26598137
1182	Grifola frondosa	MSID000998	Grifolaone A	PMID:26374926
1183	Grifola frondosa	MSID001103	L-ergothioneine	ISBN:978-981-13-6381-8
1184	Grifola frondosa	MSID001126	Linoleic acid	PMID:24033596
1185	Grifola frondosa	MSID001227	Oleic acid	PMID:24033596
1186	Grifola frondosa	MSID001235	Palmitic acid	PMID:24033596
1187	Grifola gargal	MSID000137	1,2-Diacetylsphingosine	DOI:10.1016/j.tet.2013.07.068
1188	Grifola gargal	MSID000975	Gargalol A	DOI:10.1016/j.tet.2011.05.091
1189	Grifola gargal	MSID000976	Gargalol B	DOI:10.1016/j.tet.2011.05.091
1190	Grifola gargal	MSID000977	Gargalol C	DOI:10.1016/j.tet.2011.05.091
1191	Grifola gargal	MSID001103	L-ergothioneine	ISBN:978-981-13-6381-8
1192	Gymnopus fusipes	MSID001000	Gymnopeptide A	PMID:27194202
1193	Gymnopus fusipes	MSID001001	Gymnopeptide B	PMID:27194202
1194	Hericium coralloides	MSID000526	Coralcuparene	PMID:29773898
1195	Hericium coralloides	MSID000527	Corallocin A	PMID:27588730
1196	Hericium coralloides	MSID000528	Corallocin B	PMID:27588730
1197	Hericium coralloides	MSID000529	Corallocin C	PMID:27588730
1198	Hericium coralloides	MSID001032	Hydrospirobenzofuran	PMID:29773898
1199	Hericium coralloides	MSID001388	Sesquibenzopyran	PMID:29773898
1200	Hericium erinaceus	MSID000123	1 -Methyl-4-( 1 -methylethenyl) -cyclohexene(limonene)	PMID:25892909
1201	Hericium erinaceus	MSID000130	1-D-arabinitol monolinoleate	DOI:10.1016/j.tet.2011.11.068
1202	Hericium erinaceus	MSID000144	11-O-acetylcyathin A3	PMID:15322365
1203	Hericium erinaceus	MSID000171	2-(Hydroxymethyl)-6-methyl-4h-pyran-4-one	PMID:25534373
1204	Hericium erinaceus	MSID000173	2-Chloro-1,3-dimethoxy-5-methylbenzene	DOI:10.1016/0031-9422(91)80050-B
1205	Hericium erinaceus	MSID000215	3-Acetyl-4-methoxybenzoic acid	DOI:10.1016/j.phytol.2014.12.011
1206	Hericium erinaceus	MSID000221	3-Hydroxyhericenone F	PMID:24654802 PMID:18835171
1207	Hericium erinaceus	MSID000237	3,7-Dimethylocta-1,6-dien-3-ol(linalool)	PMID:25892909
1208	Hericium erinaceus	MSID000260	4-Chloro-3,5-dimethoxybenzaldehyde	DOI:10.1016/0031-9422(91)80050-B
1209	Hericium erinaceus	MSID000261	4-Chloro-3,5-dimethoxybenzyl alcohol	DOI:10.5281/zenodo.3541281
1210	Hericium erinaceus	MSID000285	Ergosterol peroxide	PMID:25676326
1211	Hericium erinaceus	MSID000475	Cerebroside E	PMID:26547693
1212	Hericium erinaceus	MSID000558	Cyatha-3,12-diene	PMID:28860534
1213	Hericium erinaceus	MSID000647	Erinaceolactone A	PMID:25534373 PMID:28860534
1214	Hericium erinaceus	MSID000648	Erinaceolactone B	PMID:25534373
1215	Hericium erinaceus	MSID000649	Erinaceolactone C	PMID:25534373 PMID:28860534
1216	Hericium erinaceus	MSID000650	Erinaceolactone D	PMID:27243466
1217	Hericium erinaceus	MSID000651	Erinaceolactone E	PMID:27243466
1218	Hericium erinaceus	MSID000652	Erinaceolactone F	PMID:27243466
1219	Hericium erinaceus	MSID000653	Erinaceolactone G	PMID:28351165
1220	Hericium erinaceus	MSID000654	Erinaceolactone H	PMID:28351165
1221	Hericium erinaceus	MSID000655	Erinacerin B	PMID:25676326
1222	Hericium erinaceus	MSID000656	Erinacerin C	PMID:25565282
1223	Hericium erinaceus	MSID000657	Erinacerin D	PMID:25565282
1224	Hericium erinaceus	MSID000658	Erinacerin E	PMID:25565282
1225	Hericium erinaceus	MSID000659	Erinacerin F	PMID:25565282
1226	Hericium erinaceus	MSID000660	Erinacerin G	PMID:25565282
1227	Hericium erinaceus	MSID000661	Erinacerin H	PMID:25565282
1228	Hericium erinaceus	MSID000662	Erinacerin I	PMID:25565282
1229	Hericium erinaceus	MSID000663	Erinacerin J	PMID:25565282
1230	Hericium erinaceus	MSID000664	Erinacerin K	PMID:25565282
1231	Hericium erinaceus	MSID000665	Erinacerin L	PMID:25565282
1232	Hericium erinaceus	MSID000666	Erinacerin M	DOI:10.1016/j.tet.2015.10.068
1233	Hericium erinaceus	MSID000667	Erinacerin N	DOI:10.1016/j.tet.2015.10.068
1234	Hericium erinaceus	MSID000668	Erinacerin O	DOI:10.1016/j.tet.2015.10.068
1235	Hericium erinaceus	MSID000669	Erinacerin P	DOI:10.1016/j.tet.2015.10.068
1236	Hericium erinaceus	MSID000670	Erinacerin Q	DOI:10.1016/j.tet.2015.10.068
1237	Hericium erinaceus	MSID000671	Erinacerin R	DOI:10.1016/j.tet.2015.10.068
1238	Hericium erinaceus	MSID000672	Erinacerin S	DOI:10.1016/j.tet.2015.10.068
1239	Hericium erinaceus	MSID000673	Erinacerin T	DOI:10.1016/j.tet.2015.10.068
1240	Hericium erinaceus	MSID000674	Erinacine A	DOI:10.1016/s0040-4039(00)76760-8 PMID:31569709 PMID:24654802 PMID:29951133 PMID:28860534 PMID:29509661
1241	Hericium erinaceus	MSID000675	Erinacine B	DOI:10.1016/s0040-4039(00)76760-8 PMID:24654802 PMID:29951133 PMID:28860534 PMID:29509661
1242	Hericium erinaceus	MSID000676	Erinacine C	DOI:10.1016/s0040-4039(00)76760-8 PMID:24654802 PMID:29951133 PMID:28860534 PMID:29509661
1243	Hericium erinaceus	MSID000677	Erinacine D	PMID:29951133 PMID:28860534 PMID:24654802
1244	Hericium erinaceus	MSID000678	Erinacine G	PMID:24654802 DOI:10.1016/0040-4039(96)01687-5
1245	Hericium erinaceus	MSID000679	Erinacine H	PMID:29951133 PMID:24654802
1246	Hericium erinaceus	MSID000680	Erinacine I	PMID:24654802
1247	Hericium erinaceus	MSID000681	Erinacine J	PMID:24654802 DOI:10.1016/j.tet.2006.06.091
1248	Hericium erinaceus	MSID000682	Erinacine K	PMID:24654802 DOI:10.1016/j.tet.2006.06.091
1249	Hericium erinaceus	MSID000683	Erinacine P	PMID:24654802
1250	Hericium erinaceus	MSID000684	Erinacine Q	PMID:24654802 PMID:12005051
1251	Hericium erinaceus	MSID000685	Erinacine R	DOI:10.1515/znb-2008-1017
1252	Hericium erinaceus	MSID000686	Erinacine S	PMID:29951133 PMID:26807743
1253	Hericium erinaceus	MSID000687	Erinacine T	PMID:29780164
1254	Hericium erinaceus	MSID000688	Erinacine U	PMID:29780164
1255	Hericium erinaceus	MSID000689	Erinacine V	PMID:29780164
1256	Hericium erinaceus	MSID000690	Erinacol	PMID:15322365 PMID:24654802
1257	Hericium erinaceus	MSID000691	Erinapyrone A	PMID:28860534 DOI:10.1246/cl.1992.2475
1258	Hericium erinaceus	MSID000692	Erinapyrone B	PMID:28860534 DOI:10.1246/cl.1992.2475
1259	Hericium erinaceus	MSID000693	Erinarol A	PMID:25437304
1260	Hericium erinaceus	MSID000694	Erinarol B	PMID:25437304
1261	Hericium erinaceus	MSID000695	Erinarol C	PMID:25437304
1262	Hericium erinaceus	MSID000696	Erinarol D	PMID:25437304
1263	Hericium erinaceus	MSID000697	Erinarol E	PMID:25437304
1264	Hericium erinaceus	MSID000698	Erinarol F	PMID:25437304
1265	Hericium erinaceus	MSID000785	Fumitremorgin C	PMID:28860534
1266	Hericium erinaceus	MSID001007	Hericene A	DOI:10.1021/np50107a006 PMID:28860534
1267	Hericium erinaceus	MSID001008	Hericene B	DOI:10.1021/np50107a006
1268	Hericium erinaceus	MSID001009	Hericene D	PMID:20924382
1269	Hericium erinaceus	MSID001010	Hericene C	DOI:10.1021/np50107a006
1270	Hericium erinaceus	MSID001011	Hericenone A	PMID:24654802 DOI:10.1016/s0040-4039(00)94558-1
1271	Hericium erinaceus	MSID001012	Hericenone B	PMID:24654802 DOI:10.1016/s0040-4039(00)94558-1
1272	Hericium erinaceus	MSID001013	Hericenone D	PMID:31569709 PMID:24654802 PMID:25676326 DOI:10.1016/0040-4039(91)80039-9
1273	Hericium erinaceus	MSID001014	Hericenone E	PMID:25288148 PMID:24654802 PMID:25676326 DOI:10.1016/0040-4039(91)80039-9
1274	Hericium erinaceus	MSID001015	Hericenone F	PMID:24654802 DOI:10.1016/0031-9422(92)80127-z PMID:25676326
1275	Hericium erinaceus	MSID001016	Hericenone G	PMID:24654802 DOI:10.1016/0031-9422(92)80127-z
1276	Hericium erinaceus	MSID001017	Hericenone H	PMID:24654802 DOI:10.1016/0031-9422(92)80127-z
1277	Hericium erinaceus	MSID001018	Hericenone J	PMID:18835171
1278	Hericium erinaceus	MSID001019	Hericenone K	PMID:26481911
1279	Hericium erinaceus	MSID001020	Hericerin	DOI:10.1080/00021369.1991.10870996 PMID:32269298
1280	Hericium erinaceus	MSID001021	Hericirine	DOI:10.1016/j.tetlet.2014.05.117
1281	Hericium erinaceus	MSID001022	Herierin III	PMID:28860534
1282	Hericium erinaceus	MSID001095	Isohericerin	DOI:10.1016/j.tet.2011.11.068 PMID:25676326
1283	Hericium erinaceus	MSID001103	L-ergothioneine	ISBN:978-981-13-6381-8
1284	Hericium erinaceus	MSID001104	1-Methyl-4-(prop-1-en-2-yl)-cyclohexan-1-ol(β-Terpineol)	PMID:25892909
1285	Hericium erinaceus	MSID001127	Lovastatin	PMID:24941169
1286	Hericium erinaceus	MSID001208	N-de(phenylethyl)isohericerin	DOI:10.1016/j.tet.2011.11.068
1287	Hericium erinaceus	MSID001561	Caputmedusin A	PMID:28859931
1288	Hericium erinaceus	MSID001562	Caputmedusin B	PMID:28859931
1289	Hericium erinaceus	MSID001563	Caputmedusin C	PMID:28859931
1290	Hericium erinaceus	MSID001564	Caputmedusin D	PMID:28859931
1291	Hericium erinaceus	MSID001565	Caputmedusin F	PMID:28859931
1292	Hericium erinaceus	MSID001566	Caputmedusin G	PMID:28859931
1293	Hericium erinaceus	MSID001567	Caputmedusin I	PMID:28859931
1294	Hericium erinaceus	MSID001576	Erinapyrone C	PMID:28860534
1295	Hericium erinaceus	MSID001616	Methylthiogliotoxin	PMID:28860534
1296	Hericium erinaceus	MSID001647	Hericenone C	PMID:31569709 PMID:24654802 DOI:10.1016/0040-4039(91)80039-9
1297	Hericium erinaceus	MSID001655	Caputmedusin E	PMID:28859931
1298	Hericium erinaceus	MSID001656	Caputmedusin H	PMID:28859931
1299	Hericium erinaceus	MSID001657	Caputmedusin J	PMID:28859931
1300	Hericium erinaceus	MSID001658	Caputmedusin K	PMID:28859931
1301	Hericium erinaceus	MSID001661	Hericenone I	PMID:20924382
1302	Hericium erinaceus	MSID001705	Erinacine E	PMID:24654802 DOI:10.1016/0040-4039(96)01687-5 PMID:29951133 PMID:28860534 PMID:29509661
1303	Hericium erinaceus	MSID001804	Methyl 4-hydroxy-3-(3-methylbutanoyl)benzoate	PMID:19661683
1304	Hericium flagellum	MSID000674	Erinacine A	PMID:29509661
1305	Hericium flagellum	MSID000675	Erinacine B	PMID:29509661
1306	Hericium flagellum	MSID000676	Erinacine C	PMID:29509661
1307	Hericium flagellum	MSID001705	Erinacine E	PMID:29509661
1308	Hydnum repandum	MSID001103	L-ergothioneine	ISBN:978-981-13-6381-8
1309	Hygrophorus chrysodon	MSID000485	Chrysotrione A	PMID:17253868
1310	Hygrophorus chrysodon	MSID000486	Chrysotrione B	PMID:17253868
1311	Hymenochaete xerantica	MSID000231	3,4-Dihydroxy-benzoic acid	PMID:16908141
1312	Hymenochaete xerantica	MSID000232	3,4-Dihydroxybenzaldehyde	PMID:16908141
1313	Hymenochaete xerantica	MSID001079	Inoscavin A	DOI:10.1016/s0040-4039(99)01406-9
1314	Hymenochaete xerantica	MSID001080	Inoscavin B	PMID:16499338
1315	Hymenochaete xerantica	MSID001081	Inoscavin C	PMID:16488146
1316	Hymenochaete xerantica	MSID001082	Inoscavin D	PMID:16908141
1317	Hymenochaete xerantica	MSID001091	Interfungin A	PMID:17387019
1318	Hymenochaete xerantica	MSID001092	Interfungin B	PMID:17387019
1319	Hymenochaete xerantica	MSID001093	Interfungin C	PMID:17387019
1320	Hymenochaete xerantica	MSID001178	Meshimakobnol A	PMID:16908141
1321	Hymenochaete xerantica	MSID001197	Methyldavallialactone	PMID:16488146
1322	Hymenochaete xerantica	MSID001198	Methylinoscavin A	PMID:16499338
1323	Hymenochaete xerantica	MSID001199	Methylinoscavin B	PMID:16499338
1324	Hymenochaete xerantica	MSID001200	Methylinoscavin C	PMID:16488146
1325	Hymenochaete xerantica	MSID001201	Methylinoscavin D	PMID:16908141
1326	Hypholoma fasciculare	MSID000708	Fascicularone H	DOI:10.1002/hlca.200590237
1327	Hypholoma fasciculare	MSID000709	Fascicularone I	DOI:10.1002/hlca.200590237
1328	Hypholoma fasciculare	MSID000710	Fascicularone J	DOI:10.1002/hlca.200590237
1329	Hypholoma fasciculare	MSID000711	Fascicularone K	DOI:10.1002/hlca.200590237
1330	Hypholoma fasciculare	MSID000712	Fasciculic acid E	DOI:10.1002/(sici)1521-4028(199912)39
1331	Hypholoma fasciculare	MSID000713	Fasciculic acid F	DOI:10.1002/(sici)1521-4028(199912)39
1332	Hypsizygus marmoreus	MSID001037	Hypsiziprenol-A11	PMID:10563937
1333	Hypsizygus marmoreus	MSID001038	Hypsiziprenol-A12	PMID:10563937
1334	Hypsizygus marmoreus	MSID001039	Hypsiziprenol-A13	PMID:10563937
1335	Hypsizygus marmoreus	MSID001040	Hypsiziprenol-A14	PMID:10563937
1336	Hypsizygus marmoreus	MSID001041	Hypsiziprenol-A8	PMID:10563937
1337	Hypsizygus marmoreus	MSID001042	Hypsiziprenol-A9	PMID:10563937
1338	Hypsizygus marmoreus	MSID001043	Hypsiziprenol-AA13	PMID:10563937
1339	Hypsizygus marmoreus	MSID001044	Hypsiziprenol-AA14	PMID:10563937
1340	Hypsizygus marmoreus	MSID001045	Hypsiziprenol-AA8	PMID:10563937
1341	Hypsizygus marmoreus	MSID001046	Hypsiziprenol-AA9	PMID:10563937
1342	Hypsizygus marmoreus	MSID001047	Hypsiziprenol-B10	PMID:10563937
1343	Hypsizygus marmoreus	MSID001048	Hypsiziprenol-B12	PMID:10563937
1344	Hypsizygus marmoreus	MSID001049	Hypsiziprenol-B8	PMID:10563937
1345	Hypsizygus marmoreus	MSID001050	Hypsiziprenol-B9	PMID:10563937
1346	Hypsizygus marmoreus	MSID001051	Hypsiziprenol-BA10	PMID:10563937
1347	Hypsizygus marmoreus	MSID001052	Hypsiziprenol-C9	PMID:10563937
1348	Imleria badia	MSID001471	γ-L-glutamethylethylamide	PMID:22582152
1349	Inonotus hispidus	MSID001030	Hispidin	PMID:27428885 DOI:10.1039/jr9610004995
1350	Inonotus hispidus	MSID001031	Hispolon	PMID:27428885 DOI:10.1016/0031-9422(95)00717-2
1351	Inonotus hispidus	MSID001071	Inonotusin A	PMID:21628917
1352	Inonotus hispidus	MSID001720	Inonotusin B	PMID:21628917
1353	Inonotus obliquus	MSID000176	2, 5-Dihydroxylterephtalic acid	PMID:23679238
1354	Inonotus obliquus	MSID000220	3-Hydroxy-2-oxo-2h-chromene-4,6-dicarboxylic acid	PMID:26219502
1355	Inonotus obliquus	MSID000228	3, 4-Dihydroxyl-benzalacetone	PMID:24654802 PMID:23679238
1356	Inonotus obliquus	MSID000231	3,4-Dihydroxy-benzoic acid	PMID:23679238 PMID:17666849
1357	Inonotus obliquus	MSID000232	3,4-Dihydroxybenzaldehyde	PMID:23679238
1358	Inonotus obliquus	MSID000244	3beta-Hydroxy-lanosta-8,24-dien-21-al	PMID:17340294 PMID:23679238
1359	Inonotus obliquus	MSID000264	4-Hydroxy-3,5-dimethoxy benzoic acid 2-hydroxy-1-hydroxymethyl ethyl ester	PMID:17666849
1360	Inonotus obliquus	MSID000285	Ergosterol peroxide	PMID:23679238
1361	Inonotus obliquus	MSID000461	Caffeic acid	PMID:23679238 PMID:17666849
1362	Inonotus obliquus	MSID001030	Hispidin	PMID:23679238
1363	Inonotus obliquus	MSID001031	Hispolon	PMID:23679238
1364	Inonotus obliquus	MSID001057	Inonoblin B	PMID:17980585
1365	Inonotus obliquus	MSID001058	Inonoblin C	PMID:17980585
1366	Inonotus obliquus	MSID001060	Inonotsudiol A	PMID:20691456
1367	Inonotus obliquus	MSID001061	Inonotsuoxide A	PMID:17049251
1368	Inonotus obliquus	MSID001063	Inonotsuoxodiol A	PMID:20691456
1369	Inonotus obliquus	MSID001064	Inonotsutriol B	DOI:10.1002/hlca.200890165
1370	Inonotus obliquus	MSID001065	Inonotsutriols A	DOI:10.1002/hlca.200890165
1371	Inonotus obliquus	MSID001066	Inonotusane B	PMID:25542686
1372	Inonotus obliquus	MSID001067	Inonotsutriol C	DOI:10.1002/hlca.200890165
1373	Inonotus obliquus	MSID001068	Inonotsutriol D	DOI:10.1016/j.phytol.2011.07.001
1374	Inonotus obliquus	MSID001069	Inonotusane C	PMID:25542686
1375	Inonotus obliquus	MSID001070	Inonotusic acid	PMID:24359303
1376	Inonotus obliquus	MSID001072	Inonotusol A	PMID:24359303
1377	Inonotus obliquus	MSID001073	Inonotusol B	PMID:24359303
1378	Inonotus obliquus	MSID001074	Inonotusol C	PMID:24359303
1379	Inonotus obliquus	MSID001075	Inonotusol D	PMID:24359303
1380	Inonotus obliquus	MSID001076	Inonotusol E	PMID:24359303
1381	Inonotus obliquus	MSID001077	Inonotusol F	PMID:24359303
1382	Inonotus obliquus	MSID001078	Inonotusol G	PMID:24359303
1383	Inonotus obliquus	MSID001083	Inoterpene A	DOI:10.1016/j.tet.2009.01.076
1384	Inonotus obliquus	MSID001084	Inoterpene B	DOI:10.1016/j.tet.2009.01.076
1385	Inonotus obliquus	MSID001085	Inoterpene C	DOI:10.1016/j.tet.2009.01.076
1386	Inonotus obliquus	MSID001086	Inoterpene E	DOI:10.1016/j.tet.2009.01.076
1387	Inonotus obliquus	MSID001087	Inoterpene F	DOI:10.1016/j.tet.2009.01.076
1388	Inonotus obliquus	MSID001088	Inotodiol	DOI:10.1016/s0040-4020(01)93570-7 PMID:24815470 PMID:23679238
1389	Inonotus obliquus	MSID001178	Meshimakobnol A	PMID:17980585
1390	Inonotus obliquus	MSID001275	Phelligridin E	PMID:17980585
1391	Inonotus obliquus	MSID001277	Phelligridin G	PMID:17980585
1392	Inonotus obliquus	MSID001279	Phelligridin I	PMID:17980585
1393	Inonotus obliquus	MSID001400	Spiroinonotsuoxodiol	PMID:20691456
1394	Inonotus obliquus	MSID001440	Syringic acid	PMID:23679238
1395	Inonotus obliquus	MSID001496	2,5-Dihydroxyterpatalic acid	PMID:17666849
1396	Inonotus obliquus	MSID001603	Lanosta-24-ene-3β, 21-diol	PMID:23679238
1397	Inonotus obliquus	MSID001721	Inonotsulide B	DOI:10.1002/hlca.200790214
1398	Inonotus obliquus	MSID001727	Inoterpene D	DOI:10.1016/j.tet.2009.01.076
1399	Inonotus obliquus	MSID001738	Lanosta-8, 23e-diene-3β, 22r, 25-triol	PMID:23679238
1400	Inonotus obliquus	MSID001762	Lanosta-7, 9(11), 23e-triene-3β, 22r, 25-triol	PMID:23679238
1401	Isaria cicadae	MSID000169	2-(3-Carboxy-2-hydroxypropyl)-3-methyl-2-cyclopentenone	PMID:18305360
1402	Isaria cicadae	MSID000275	5-(2-Hydroxyethyl)-2-furanacetic acid	PMID:18305360
1403	Isaria cicadae	MSID000425	Beauvericin	DOI:10.1007/10_2008_26
1404	Isaria cicadae	MSID000532	Cordycecin A	PMID:24862062
1405	Laccaria amethystina	MSID001105	Laccaridione A	PMID:11213295
1406	Laccaria amethystina	MSID001106	Laccaridione B	PMID:11213295
1407	Laccaria vinaceoavellanea	MSID001107	Laccarin	ISBN:978-981-13-6381-8
1408	Lactarius aurantiacus	MSID001202	Mitissimol D	PMID:17420568
1409	Lactarius aurantiacus	MSID001203	Mitissimol E	PMID:17420568
1410	Lactarius aurantiacus	MSID001204	Mitissimolone	DOI:10.1002/hlca.200900227
1411	Lactarius aurantiacus	MSID001712	Mitissimol B	PMID:16989534 DOI:10.1007/10_2008_26
1412	Lactarius aurantiacus	MSID001713	Mitissimol C	PMID:16989534 DOI:10.1007/10_2008_26
1413	Lactarius aurantiacus	MSID001714	Mitissimol A linoleate	PMID:16989534 DOI:10.1007/10_2008_26
1414	Lactarius aurantiacus	MSID001739	Mitissimol A	PMID:16989534 DOI:10.1007/10_2008_26
1415	Lactarius aurantiacus	MSID001753	Mitissimol A oleate	PMID:16989534 DOI:10.1007/10_2008_26
1416	Lactarius deterrimus	MSID000132	1-Formyl-4-methyl-7-isopropyl azulene (11,12-dihydro-lactaroviolin)	DOI:10.1016/S0031-9422(00)80834-1
1417	Lactarius flavidulus	MSID000741	Flavidulol D	DOI:10.1248/cpb.41.2032
1418	Lactarius hirtipes	MSID001501	2β,α-Epoxy-6z, 9z-humuladien-8α-ol	DOI:10.1007/10_2008_26
1419	Laetiporus sulphureus	MSID000174	2-Dehydro-3-deoxylaetiporic acid A	PMID:15797608
1420	Laetiporus sulphureus	MSID000296	7-Cis-laetiporic acid	DOI:10.1016/j.tetlet.2003.11.073
1421	Laetiporus sulphureus	MSID000297	7-Trans-laetiporic acid	DOI:10.1016/j.tetlet.2003.11.073
1422	Laetiporus sulphureus	MSID000298	Laetiporic acid	DOI:10.1016/j.tetlet.2003.11.073
1423	Laetiporus sulphureus	MSID001108	Laetirobin	PMID:19842686
1424	Laetiporus sulphureus	MSID001435	Sulphureuine D	PMID:25665943
1425	Laetiporus sulphureus	MSID001436	Sulphureuine E	PMID:25665943
1426	Laetiporus sulphureus	MSID001437	Sulphureuine F	PMID:25665943
1427	Laetiporus sulphureus	MSID001438	Sulphureuine G	PMID:25665943
1428	Laetiporus sulphureus	MSID001439	Sulphureuine H	PMID:25665943
1429	Langermannia fenzlii	MSID000272	4,6-Dihydroxy-1H-isoindole-1,3(2h)-dione	DOI:10.1002/hlca.201200279
1430	Langermannia fenzlii	MSID000273	4,6-Dihydroxy-2,3-dihydro-1h-isoindol-1-one	DOI:10.1002/hlca.201200279
1431	Lentinula edodes	MSID000123	1 -Methyl-4-( 1 -methylethenyl) -cyclohexene(limonene)	PMID:25892909
1432	Lentinula edodes	MSID000138	1,2,3,4,5,6-Hexathiepane	PMID:5625860
1433	Lentinula edodes	MSID000701	Eritadenine	PMID:32733077 PMID:5391883
1434	Lentinula edodes	MSID001103	L-ergothioneine	ISBN:978-981-13-6381-8
1435	Lentinula edodes	MSID001127	Lovastatin	PMID:32733077
1436	Lentinus connatus	MSID000602	Dihydrohypnophilin	PMID:29749562
1437	Lentinus connatus	MSID001253	Panepoxydione	PMID:29749562
1438	Lentinus connatus	MSID001254	Panepoxydone	PMID:29749562
1439	Lentinus sajor-caju	MSID000003	Cerevisterol	DOI:10.4067/S0717-97072008000200015
1440	Lentinus sajor-caju	MSID000094	(22E,24R)-ergosta-4,6,8(14),22-tetraen-3-one	DOI:10.4067/S0717-97072008000200015
1441	Lentinus sajor-caju	MSID000161	Neoergosterol	DOI:10.4067/S0717-97072008000200015
1442	Lentinus sajor-caju	MSID000299	7-Ergostenol	DOI:10.4067/S0717-97072008000200015
1443	Lentinus sajor-caju	MSID000637	Ergosta-5,7,22-trien-3β-ol(ergosterol)	DOI:10.4067/S0717-97072008000200015
1444	Lentinus sajor-caju	MSID000638	Ergosta-5,7,9(11),22-tetraen-3β-ol	DOI:10.4067/S0717-97072008000200015
1445	Lentinus sajor-caju	MSID000643	3β-Hydroxyergosta-7,22-diene	DOI:10.4067/S0717-97072008000200015
1446	Lentinus sajor-caju	MSID001572	Ergosta-2,5,7,9(11),22-pentaene	DOI:10.4067/S0717-97072008000200015
1447	Lentinus sajor-caju	MSID001573	Ergosta-4,6,15(16),22-tetraen-3-one	DOI:10.4067/S0717-97072008000200015
1448	Lentinus sajor-caju	MSID001574	Ergosta-5α,8α-epidioxy-6,22-dien-3β-ol(ergosteryl peroxide)	DOI:10.4067/S0717-97072008000200015
1449	Lentinus squarrosulus	MSID000637	Ergosta-5,7,22-trien-3β-ol(ergosterol)	DOI:10.1080/21501203.2019.1707724
1450	Lentinus squarrosulus	MSID000641	Ergosta-7,22-dien-3-ol, (3.beta.,5.alpha.,22e)-	DOI:10.1080/21501203.2019.1707724
1451	Lentinus tuber-regium	MSID000003	Cerevisterol	DOI:10.1016/j.jff.2013.12.019
1452	Lentinus tuber-regium	MSID000094	(22E,24R)-ergosta-4,6,8(14),22-tetraen-3-one	DOI:10.1016/j.jff.2013.12.019
1453	Lenzites betulina	MSID000434	Betulinan A	PMID:8946751
1454	Lenzites betulina	MSID000435	Betulinan B	PMID:8946751
1455	Lepista nuda	MSID000259	4-Chloro-3-methoxybenzaldehyde	PMID:4672823
1456	Lepista nuda	MSID001103	L-ergothioneine	ISBN:978-981-13-6381-8
1457	Lepista sordida	MSID000172	2-Azahypoxanthine	PMID:20486242
1458	Lepista sordida	MSID001116	Lepistal	DOI:10.1016/0031-9422(96)00327-5
1459	Lepista sordida	MSID001117	Lepistamide A	DOI:10.1002/hlca.201000455
1460	Lepista sordida	MSID001118	Lepistamide B	DOI:10.1002/hlca.201000455
1461	Lepista sordida	MSID001119	Lepistamide C	DOI:10.1002/hlca.201000455
1462	Lepista sordida	MSID001120	Lepistatin A	PMID:28803994
1463	Lepista sordida	MSID001121	Lepistatin B	PMID:28803994
1464	Lepista sordida	MSID001122	Lepistatin C	PMID:28803994
1465	Lepista sordida	MSID001123	Lepistol	DOI:10.1016/0031-9422(96)00327-5
1466	Lepista sordida	MSID001822	3-[(2R,3R,4S)-3,4,5-trihydroxy-6-(hydroxymethyl)oxan-2-yl]-3H,4H,5H,6H,7H-imidazo[4,5-d][1,2,3]triazine-4,6-dione	PMID:29235343
1467	Lepista sordida	MSID001823	7-[(2R,3R,4S,5S,6R)-3,4,5-trihydroxy-6-(hydroxymethyl)oxan-2-yl]-3H,4H,5H,6H,7H-imidazo[4,5-d][1,2,3]triazine-4,6-dione	PMID:29235343
1468	Lepista sordida	MSID001824	5-[(2S,3S,4R,5R)-3,4,5-trihydroxy-6-(hydroxymethyl)oxan-2-yl]-3H,4H,5H,6H,7H-imidazo[4,5-d][1,2,3]triazine-4,6-dione	PMID:29235343
1469	Lepista sordida	MSID001825	3-[(2R,3R,4S,5S)-3,4,5-trihydroxy-6-(hydroxymethyl)oxan-2-yl]-3H,4H,5H-imidazo[4,5-d][1,2,3]triazin-4-one	PMID:29235343
1470	Leucopaxillus gentianeus	MSID000152	15-Deoxyoxalicine B	DOI:10.1007/10_2008_26
1471	Leucopaxillus gentianeus	MSID000154	16-Deoxycucurbitacin B	PMID:17190463 DOI:10.1007/10_2008_26 ISBN:978-981-13-6381-8
1472	Leucopaxillus gentianeus	MSID000157	18-Deoxyleucopaxillone A	PMID:17190463 DOI:10.1007/10_2008_26 ISBN:978-981-13-6381-8
1473	Leucopaxillus gentianeus	MSID000548	Cucurbitacin B	DOI:10.1007/10_2008_26 ISBN:978-981-13-6381-8
1474	Leucopaxillus gentianeus	MSID000549	Cucurbitacin B linoleyl ester	PMID:15568769
1475	Leucopaxillus gentianeus	MSID000550	Cucurbitacin B oleyl ester	PMID:15568769
1476	Leucopaxillus gentianeus	MSID000551	Cucurbitacin D	DOI:10.1007/10_2008_26 ISBN:978-981-13-6381-8
1477	Leucopaxillus gentianeus	MSID001124	Leucopaxillone A	PMID:15568769 DOI:10.1007/10_2008_26
1478	Leucopaxillus gentianeus	MSID001125	Leucopaxillone B	PMID:15568769 DOI:10.1007/10_2008_26
1479	Leucopaxillus giganteus	MSID000491	Clitocine	PMID:30073119
1480	Leucopaxillus giganteus	MSID001103	L-ergothioneine	ISBN:978-981-13-6381-8
1481	Lignosus rhinocerotis	MSID000085	(+)-Torreyol	PMID:28606152
1482	Lignosus rhinocerotis	MSID000086	α-Cadinol	PMID:28606152
1483	Lignosus rhinocerus	MSID000085	(+)-Torreyol	PMID:29491836
1484	Lignosus rhinocerus	MSID000086	α-Cadinol	PMID:29491836
1485	Macrocybe lobayensis	MSID001164	Pleurocin A	DOI:10.1177/1934578X1801300926
1486	Macrocybe lobayensis	MSID001165	Matsutoic acid	DOI:10.1177/1934578X1801300926
1487	Macrolepiota albuminosa	MSID001444	Termitomycesphin C	DOI:10.1016/s0040-4020(00)00548-2
1488	Macrolepiota albuminosa	MSID001445	Termitomycesphin D	DOI:10.1016/s0040-4020(00)00548-2
1489	Macrolepiota albuminosa	MSID001446	Termitomycesphin E	DOI:10.1016/s0968-0896(01)00125-0
1490	Macrolepiota albuminosa	MSID001447	Termitomycesphin F	DOI:10.1016/s0968-0896(01)00125-0
1491	Macrolepiota procera	MSID001684	Lepiotaprocerin E	PMID:29510036
1492	Macrolepiota procera	MSID001685	Lepiotaprocerin F	PMID:29510036
1493	Macrolepiota procera	MSID001686	Lepiotaprocerin K	PMID:29510036
1494	Macrolepiota procera	MSID001687	Lepiotaprocerin L	PMID:29510036
1495	Macrolepiota procera	MSID001786	Lepiotaprocerin I	PMID:29510036
1496	Macrolepiota procera	MSID001787	Lepiotaprocerin J	PMID:29510036
1497	Macrolepiota procera	MSID001788	Lepiotaprocerin A	PMID:29510036
1498	Macrolepiota procera	MSID001789	Lepiotaprocerin B	PMID:29510036
1499	Macrolepiota procera	MSID001790	Lepiotaprocerin C	PMID:29510036
1500	Macrolepiota procera	MSID001791	Lepiotaprocerin D	PMID:29510036
1501	Macrolepiota procera	MSID001792	Lepiotaprocerin G	PMID:29510036
1502	Macrolepiota procera	MSID001793	Lepiotaprocerin H	PMID:29510036
1503	Marasmius oreades	MSID000167	1α,15-Dihydroxymarasmene	DOI:10.1139/v89-210
1504	Marasmius oreades	MSID000252	3α-Hydroxyoreadone	DOI:10.1139/v89-210
1505	Marasmius oreades	MSID000327	Anhydromarasmone	DOI:10.1139/v89-116
1506	Marasmius oreades	MSID000589	Dehydrooreadone	DOI:10.1139/v89-210
1507	Marasmius oreades	MSID000603	Dihydromarasmone	DOI:10.1139/v89-116
1508	Marasmius oreades	MSID001097	Isomarasmone	DOI:10.1139/v89-116
1509	Marasmius oreades	MSID001163	Marasmone	DOI:10.1139/v89-116
1510	Metacordyceps taii	MSID000587	Deacetylcytochalasin C	PMID:25863432
1511	Metacordyceps taii	MSID001469	Zygosporin D	PMID:25863432
1512	Morchella deliciosa	MSID000122	(S)-malic acid-1-o-beta-d-glucopyranoside	PMID:15884853
1513	Morchella esculenta	MSID000231	3,4-Dihydroxy-benzoic acid	PMID:25546397 ISSN:2230-9926(Vol.08Issue03pp.19660-19665)
1514	Morchella esculenta	MSID000262	4-Coumaric acid	PMID:25546397 ISSN:2230-9926(Vol.08Issue03pp.19660-19665)
1515	Morchella esculenta	MSID000265	4-Hydroxybenzoic acid	PMID:25546397 ISSN:2230-9926(Vol.08Issue03pp.19660-19665)
1516	Morchella esculenta	MSID000791	Gallic acid	PMID:25546397
1517	Morchella importuna	MSID000079	Morelsin B	DOI:10.1016/j.tet.2020.131356
1518	Morchella importuna	MSID001617	Morelsin A	DOI:10.1016/j.tet.2020.131356
1519	Morchella importuna	MSID001618	Morelsin C	DOI:10.1016/j.tet.2020.131356
1520	Morchella importuna	MSID001619	Morelsin D	DOI:10.1016/j.tet.2020.131356
1521	Morchella importuna	MSID001620	Morelsin E	DOI:10.1016/j.tet.2020.131356
1522	Morchella importuna	MSID001621	Morelsin F	DOI:10.1016/j.tet.2020.131356
1523	Mycena leaiana	MSID001448	Tetrachloropyrocatechol methyl ether	PMID:9820231
1524	Mycena leaiana	MSID001609	Leaianafulvene	PMID:16136207
1525	Mycoleptodonoides aitchisonii	MSID000111	(2SR, 3RS)-2-benzyltetrahydrofuran-3-ol	DOI:10.1016/j.tetlet.2015.08.038
1526	Mycoleptodonoides aitchisonii	MSID000114	(3R,4S,1′R)-3-(1′-hydroxyethyl)-4-methyldihydrofuran-2(3h)-one	DOI:10.1016/j.tet.2008.10.068 PMID:24654802
1527	Mycoleptodonoides aitchisonii	MSID000117	(3S,4R)-5-phenylpentane-1,3,4-triol	PMID:24988471
1528	Mycoleptodonoides aitchisonii	MSID000133	1-Hydroxy-3-pentanone	PMID:24654802
1529	Mycoleptodonoides aitchisonii	MSID000214	3-(Hydroxymethyl)-4-methylfuran-2(5h)-one	DOI:10.1016/j.tet.2008.10.068 PMID:24654802
1530	Mycoleptodonoides aitchisonii	MSID000704	Ethyl 9,9-dimethoxynonanoate	DOI:10.1016/j.tetlet.2015.08.038
1531	Mylitta lapidescens	MSID001112	Leiwansterol A	PMID:24392639
1532	Mylitta lapidescens	MSID001113	Leiwansterol B	PMID:24392639
1533	Omphalotus japonicus	MSID001096	Isoilludin S	DOI:10.1016/0040-4020(65)80065-5
1534	Omphalotus japonicus	MSID001103	L-ergothioneine	ISBN:978-981-13-6381-8
1535	Omphalotus japonicus	MSID001109	Lampteroflavin	DOI:10.1016/s0040-4039(00)86679-4
1536	Omphalotus japonicus	MSID001214	Neoilludin A	DOI:10.1246/cl.1999.1113
1537	Omphalotus japonicus	MSID001215	Neoilludin B	DOI:10.1246/cl.1999.1113
1538	Ophiocordyceps jiangxiensis	MSID000478	Jiangxienone	PMID:22782880
1539	Ophiocordyceps sinensis	MSID000282	5,6-Epoxy-24(r)-methylcholesta-7,22-dien-3β-ol	DOI:10.1016/s0031-9422(99)00128-4
1540	Ophiocordyceps sinensis	MSID000530	Cordyceamide A	PMID:19122327
1541	Ophiocordyceps sinensis	MSID000531	Cordyceamide B	PMID:19122327
1542	Ophiocordyceps sinensis	MSID001722	Cordycedipeptide A	PMID:15863936 DOI:10.1007/10_2008_26
1543	Ophiocordyceps sinensis	MSID001743	5α,8α-Epidioxy-24(r)-methylcholesta-6,22-dien-3β-d-glucopyranoside	DOI:10.1016/s0031-9422(99)00128-4
1544	Panus neostrigosus	MSID001034	Hypnophilin	PMID:29749562 ISBN:978-981-13-6381-8
1545	Panus neostrigosus	MSID001254	Panepoxydone	ISBN:978-981-13-6381-8
1546	Paxillus involutus	MSID001094	Involutone	DOI:10.1139/v02-194
1547	Perenniporia fraxinea	MSID000544	Cryptoporic acid P	PMID:23571531
1548	Perenniporia fraxinea	MSID000545	Cryptoporic acid Q	PMID:23571531
1549	Perenniporia fraxinea	MSID000755	Fomitellanol A	PMID:23571531
1550	Perenniporia fraxinea	MSID000756	Fomitellanol B	PMID:23571531
1551	Perenniporia fraxinea	MSID000757	Fomitellic acid A	PMID:9514006 PMID:15726350
1552	Perenniporia fraxinea	MSID000758	Fomitellic acid B	PMID:9514006 PMID:15726350
1553	Perenniporia fraxinea	MSID000759	Fomitellic acid D	PMID:9514006
1554	Perenniporia fraxinea	MSID000760	Fomitellic acid C	PMID:9514006
1555	Phallus indusiatus	MSID000116	(3R,4S)-3,7-dimethyl-1,6-octadiene-3,4-diol	DOI:10.1016/s0031-9422(98)00630-x
1556	Phallus indusiatus	MSID000236	3,7-Dimethyl-1,6-octadiene-3,4,5-triol	DOI:10.1016/s0031-9422(98)00630-x
1557	Phallus indusiatus	MSID000256	4-[(3R,4S)-3-hydroxy-3,7-dimethylocta- 1,6-dienyl(9z, 12z)- 9,12-octadecadienoate	DOI:10.1016/s0031-9422(98)00630-x
1558	Phallus indusiatus	MSID000257	4-<(3R,4S)-3-hydroxy-3,7-dimethylocta-1,6-dienyl> (z)-9-octadecenoate	DOI:10.1016/s0031-9422(98)00630-x
1559	Phallus indusiatus	MSID000436	Bis[6-(3,4,7-trihydroxy-3, 7-dimethyloctenyl) ether	DOI:10.1016/s0031-9422(98)00630-x
1560	Phallus indusiatus	MSID000437	Bis[6-(3,4,7-trihydroxy-3,7-dimethyloctenyl)] ether	DOI:10.1016/s0031-9422(98)00630-x
1561	Phallus indusiatus	MSID000597	Dictyophorine A	DOI:10.1016/s0031-9422(97)00144-1 PMID:24654802
1562	Phallus indusiatus	MSID000598	Dictyophorine B	DOI:10.1016/s0031-9422(97)00144-1 PMID:24654802
1563	Phallus indusiatus	MSID000599	Dictyoquinazol A	PMID:12502311
1564	Phallus indusiatus	MSID000600	Dictyoquinazol B	PMID:12502311
1565	Phallus indusiatus	MSID000601	Dictyoquinazol C	PMID:12502311
1566	Phallus indusiatus	MSID001449	Teucrenone	DOI:10.1016/s0031-9422(97)00144-1
1567	Phellinus chrysoloma	MSID000094	(22E,24R)-ergosta-4,6,8(14),22-tetraen-3-one	PMID:32479001
1568	Phellinus chrysoloma	MSID000637	Ergosta-5,7,22-trien-3β-ol(ergosterol)	PMID:32479001
1569	Phellinus chrysoloma	MSID000643	3β-Hydroxyergosta-7,22-diene	PMID:32479001
1570	Phellinus chrysoloma	MSID001611	Methyl 20(21)-dehydrolucidenate A	PMID:32479001
1571	Phellinus chrysoloma	MSID001612	Methyl 3,4-dihydroxybenzoate	PMID:32479001
1572	Phellinus gilvus	MSID000990	Gilvsin A	PMID:19261312
1573	Phellinus gilvus	MSID000991	Gilvsin B	PMID:19261312
1574	Phellinus gilvus	MSID000992	Gilvsin C	PMID:19261312
1575	Phellinus gilvus	MSID000993	Gilvsin D	PMID:19261312
1576	Phellinus igniarius	MSID000006	(-)-(2R,3S,6S,7S,9R)-tremul-1(10)-ene-11,12,14-triol	PMID:20583752
1577	Phellinus igniarius	MSID000007	(-)-(2S,3S,6S,7S,9R)-tremul-1(10)-ene-11,12,14-triol	PMID:20583752
1578	Phellinus igniarius	MSID000008	(-)-(2S,3S,6S,7S,9S)-tremul-1(10)-ene-11,12,15-triol	PMID:20583752
1579	Phellinus igniarius	MSID000009	(-)-(2S,3S,4S,6S,7S)-tremul-1(10)-ene-4,11,12-triol	PMID:20583752
1580	Phellinus igniarius	MSID000075	(+)-(1R,6S,7S)-tremul-2-ene-12(11)-lactone	PMID:20583752
1581	Phellinus igniarius	MSID000076	(+)-(2S,3R,6S,7S)-tremul-1(10)-ene-2,12-diol	PMID:20583752
1582	Phellinus igniarius	MSID000077	(+)-(3S,6R,7R,10S)-tremul-1-ene-6,10,12-triol	PMID:20583752
1583	Phellinus igniarius	MSID000078	(+)-(3S,6S,7S,10S)-tremul-1-ene-10,11,12-triol	PMID:20583752
1584	Phellinus igniarius	MSID000115	(3R,4S,5S,17R,20R)-3,17,20-trihydroxy-4-methylpregn-8-en-7-one	PMID:20583752
1585	Phellinus igniarius	MSID000148	12,15-Dihydroxytremulene	DOI:10.1016/j.phytol.2014.10.019
1586	Phellinus igniarius	MSID000295	6β,11,12-Trihydroxytremul-1(10)-ene	PMID:10598029
1587	Phellinus igniarius	MSID000629	Phelligrin A	DOI:10.1007/10_2008_26
1588	Phellinus igniarius	MSID001053	Igniaren A	PMID:19557671
1589	Phellinus igniarius	MSID001054	Igniaren B	PMID:19557671
1590	Phellinus igniarius	MSID001055	Igniaren C	PMID:19557671
1591	Phellinus igniarius	MSID001056	Igniarine	PMID:29232973
1592	Phellinus igniarius	MSID001178	Meshimakobnol A	DOI:10.1007/10_2008_26 PMID:15165144
1593	Phellinus igniarius	MSID001179	Meshimakobnol B	DOI:10.1007/10_2008_26 PMID:15165144
1594	Phellinus igniarius	MSID001273	Phelligridin A	DOI:10.1007/10_2008_26
1595	Phellinus igniarius	MSID001274	Phelligridin B	DOI:10.1007/10_2008_26
1596	Phellinus igniarius	MSID001275	Phelligridin E	DOI:10.1007/10_2008_26 PMID:15165144
1597	Phellinus igniarius	MSID001276	Phelligridin F	DOI:10.1007/10_2008_26 PMID:15165144
1598	Phellinus igniarius	MSID001277	Phelligridin G	DOI:10.1007/10_2008_26
1599	Phellinus igniarius	MSID001278	Phelligridin H	PMID:17279797 DOI:10.1007/10_2008_26
1600	Phellinus igniarius	MSID001279	Phelligridin I	PMID:17279797 DOI:10.1007/10_2008_26
1601	Phellinus igniarius	MSID001280	Phelligridin J	PMID:17279797 DOI:10.1007/10_2008_26
1602	Phellinus igniarius	MSID001285	Phellinignincisterol A	PMID:20583752
1603	Phellinus igniarius	MSID001286	Phellinignincisterol B	PMID:20583752
1604	Phellinus igniarius	MSID001287	Phellinignincisterol C	PMID:20583752
1605	Phellinus igniarius	MSID001456	Tremulene-6,11,12-triol	PMID:20583752
1606	Phellinus igniarius	MSID001622	Phelligridimer	DOI:10.1007/10_2008_26
1607	Phellinus igniarius	MSID001623	Phelligrin B	DOI:10.1007/10_2008_26
1608	Phellinus pini	MSID000270	4-Vinylresorcinol	DOI:10.1016/0031-9422(96)00125-2
1609	Phellinus pini	MSID000396	Asperenone	PMID:6073032
1610	Phellinus pini	MSID001205	N-(2'-hydroxytriacontanoyl)-d-erythro-l,3,4-trihydroxy-2-amino-octadecane	DOI:10.1016/0031-9422(96)00335-4
1611	Pholiota nameko	MSID001103	L-ergothioneine	ISBN:978-981-13-6381-8
1612	Pholiota nameko	MSID001520	3R,6S,7S,8R,10S)-3,7,14-trihydroxy-1-sterpuren	PMID:30887855
1613	Pholiota spumosa	MSID001625	Putrescine-1,4-dicinnamide	ISBN:978-981-13-6381-8
1614	Phylloporia ribis	MSID000482	Chlorophellin A3	PMID:18667308
1615	Phylloporia ribis	MSID000483	Chlorophellin B	PMID:18667308
1616	Phylloporia ribis	MSID000484	Chlorophellin C	PMID:18667308
1617	Phylloporia ribis	MSID001293	Phelliribsin A	PMID:24390502
1618	Phylloporia ribis	MSID001354	Ribisin A	PMID:23215538
1619	Phylloporia ribis	MSID001355	Ribisin B	PMID:23215538
1620	Phylloporia ribis	MSID001356	Ribisin C	PMID:23215538
1621	Phylloporia ribis	MSID001357	Ribisin D	PMID:23215538
1622	Pleurotus citrinopileatus	MSID000231	3,4-Dihydroxy-benzoic acid	DOI:10.1016/j.apjtb.2015.10.012
1623	Pleurotus citrinopileatus	MSID000262	4-Coumaric acid	DOI:10.1016/j.apjtb.2015.10.012
1624	Pleurotus citrinopileatus	MSID000461	Caffeic acid	DOI:10.1016/j.apjtb.2015.10.012
1625	Pleurotus citrinopileatus	MSID000791	Gallic acid	DOI:10.1016/j.apjtb.2015.10.012
1626	Pleurotus cornucopiae	MSID000112	(3aR,6S,7R,7aS)-6,7-dihydroxy-6-methyl-3-methylenehexahydrobenzofuran-2(3h)-one	PMID:23650961
1627	Pleurotus cornucopiae	MSID001307	Pleurospiroketal A	ISBN:978-981-10-5977-3 PMID:23294419
1628	Pleurotus cornucopiae	MSID001308	Pleurospiroketal B	ISBN:978-981-10-5977-3 PMID:23294419
1629	Pleurotus cornucopiae	MSID001309	Pleurospiroketal E	ISBN:978-981-10-5977-3 PMID:23294419
1630	Pleurotus cornucopiae	MSID001663	Pleurospiroketal C	ISBN:978-981-10-5977-3 PMID:23294419
1631	Pleurotus cystidiosus	MSID000492	Clitocybulol D	PMID:25537793
1632	Pleurotus cystidiosus	MSID000493	Clitocybulol E	PMID:25537793
1633	Pleurotus cystidiosus	MSID000494	Clitocybulol F	PMID:25537793
1634	Pleurotus cystidiosus	MSID001310	Pleuroton A	PMID:25537793
1635	Pleurotus cystidiosus	MSID001311	Pleuroton B	PMID:25537793
1636	Pleurotus djamor	MSID000637	Ergosta-5,7,22-trien-3β-ol(ergosterol)	ISBN:978-981-13-6381-8
1637	Pleurotus eryngii	MSID000170	2-(4-Methyl-l-cyclohex-3-enyl)propan-2-ol(alpha-terpineol)	PMID:25892909
1638	Pleurotus eryngii	MSID000279	5-Hydroxy-3,4,5-trimethylfuran-2(5h)-one	PMID:22769974
1639	Pleurotus eryngii	MSID000699	Eringiacetal B	PMID:28856887
1640	Pleurotus eryngii	MSID000702	Eryngiolide A	PMID:22769974
1641	Pleurotus eryngii	MSID001103	L-ergothioneine	ISBN:978-981-13-6381-8
1642	Pleurotus eryngii	MSID001160	Lupeol	ISBN:978-981-13-6381-8
1643	Pleurotus eryngii	MSID001164	Pleurocin A	PMID:28856887
1644	Pleurotus eryngii	MSID001305	Pleurocin B	PMID:28856887
1645	Pleurotus eryngii	MSID001306	Pleurone	PMID:21673713
1646	Pleurotus eryngii	MSID001494	2,3,23-Trihydroxy-urs-12-en-28-oic acid	ISBN:978-981-13-6381-8
1647	Pleurotus eryngii	MSID001495	2,3,6,23-Tetrahydroxy-urs-12-en-28-oic acid	ISBN:978-981-13-6381-8
1648	Pleurotus eryngii	MSID001731	Eringiacetal A	DOI:10.1002/ejoc.201500382
1649	Pleurotus ferulae	MSID000285	Ergosterol peroxide	DOI:10.1007/BF03175350
1650	Pleurotus ferulae	MSID000481	Cheimonophyllon E	DOI:10.1007/BF03175350
1651	Pleurotus ferulae	MSID001527	5-Hydroxymethyl-furancarbaldehyde	DOI:10.1007/BF03175350
1652	Pleurotus floridanus	MSID000791	Gallic acid	DOI:10.22159/ajpcr.2017.v10i3.16547
1653	Pleurotus giganteus	MSID000161	Neoergosterol	DOI:10.1080/87559129.2018.1542710
1654	Pleurotus nebrodensis	MSID000003	Cerevisterol	PMID:29199558
1655	Pleurotus nebrodensis	MSID000637	Ergosta-5,7,22-trien-3β-ol(ergosterol)	PMID:29199558
1656	Pleurotus nebrodensis	MSID001575	Ergosterol-3-O-β-d-glucopyranoside	PMID:29199558
1657	Pleurotus ostreatus	MSID000118	(E)-6-((2-amino-4,5-dimethylphenyl)imino)dihydropyrimidine-2,4,5(3h)-trione	PMID:28395537
1658	Pleurotus ostreatus	MSID000285	Ergosterol peroxide	PMID:29749562 ISBN:978-981-13-6381-8
1659	Pleurotus ostreatus	MSID000635	Ergosta-4,6,8,22-tetraen-3-one	DOI:10.1016/s0031-9422(97)00249-5
1660	Pleurotus ostreatus	MSID001103	L-ergothioneine	ISBN:978-981-13-6381-8
1661	Pleurotus ostreatus	MSID001232	Oxalamido-L-leucine methyl ester	PMID:28395537
1662	Pleurotus ostreatus	MSID001233	Oxalamido-L-phenylalanine methyl ester	PMID:28395537
1663	Pleurotus ostreatus	MSID001313	Poh 1	PMID:9846731
1664	Pleurotus ostreatus	MSID001314	Poh 2	PMID:9846731
1665	Pleurotus ostreatus	MSID001315	Poh 3	PMID:9846731
1666	Pleurotus ostreatus	MSID001470	γ-Aminobutyric acid	PMID:24941169
1667	Podaxis pistillaris	MSID000630	Epicorazine C	PMID:16550228
1668	Podaxis pistillaris	MSID001674	Epicorazine A	PMID:16550228
1669	Podaxis pistillaris	MSID001675	Epicorazine B	PMID:16550228
1670	Polyozellus multiplex	MSID001100	Kynapcin-12	PMID:10994814
1671	Polyozellus multiplex	MSID001101	Kynapcin-13	PMID:12243451
1672	Polyozellus multiplex	MSID001102	Kynapcin-28	PMID:12243451
1673	Polyozellus multiplex	MSID001103	L-ergothioneine	ISBN:978-981-13-6381-8
1674	Polyozellus multiplex	MSID001316	Polyozellic acid	PMID:24601669
1675	Polyozellus multiplex	MSID001317	Polyozellin	PMID:9360624 ISBN:978-981-13-6381-8
1676	Polyporus annulatus	MSID000379	Applanoxidic acid A	PMID:25975187
1677	Polyporus annulatus	MSID000382	Applanoxidic acid F	PMID:25975187
1678	Polyporus annulatus	MSID000383	Applanoxidic acid G	PMID:25975187
1679	Polyporus annulatus	MSID000385	Applanoxidic acid H	PMID:25975187
1680	Polyporus annulatus	MSID001716	Applanoxidic acid B	DOI:10.1016/0031-9422(91)83476-2
1681	Polyporus annulatus	MSID001717	Applanoxidic acid C	PMID:25975187
1682	Polyporus lipsiensis	MSID000818	Ganoderenic acid A	PMID:25975187
1683	Polyporus lipsiensis	MSID000821	Ganoderenic acid D	PMID:25975187
1684	Polyporus lipsiensis	MSID000862	Ganoderic acid N	PMID:25975187
1685	Polyporus umbellatus	MSID000094	(22E,24R)-ergosta-4,6,8(14),22-tetraen-3-one	ISBN:978-981-13-6381-8
1686	Polyporus umbellatus	MSID000165	1beta-Hydroxylfriedelin	DOI:10.3184/030823409x12562954717147
1687	Polyporus umbellatus	MSID001318	Polyporoid A	PMID:18439824
1688	Polyporus umbellatus	MSID001319	Polyporoid B	PMID:18439824
1689	Polyporus umbellatus	MSID001320	Polyporoid C	PMID:18439824
1690	Polyporus umbellatus	MSID001321	Polyporusterone A	PMID:1576664
1691	Polyporus umbellatus	MSID001322	Polyporusterone B	PMID:18439824
1692	Polyporus umbellatus	MSID001323	Polyporusterone G	PMID:1576664
1693	Porogramme albocincta	MSID001324	Porialbocin A	PMID:29749562
1694	Pseudoinonotus dryadeus	MSID000003	Cerevisterol	ISBN:978-981-13-6381-8
1695	Pycnoporus sanguineus	MSID000496	Coibanol A	PMID:25177062
1696	Pycnoporus sanguineus	MSID000497	Coibanol B	PMID:25177062
1697	Pycnoporus sanguineus	MSID000498	Coibanol C	PMID:25177062
1698	Rugiboletus extremiorientalis	MSID001111	Leccinine A	DOI:10.1016/j.tet.2011.05.052
1699	Rugiboletus extremiorientalis	MSID001638	2-[2-Formyl-5-(methoxymethyl)-1h-pyrrol-1-yl]acetic acid	DOI:10.1007/s10600-015-1394-5
1700	Russula cyanoxantha	MSID000094	(22E,24R)-ergosta-4,6,8(14),22-tetraen-3-one	DOI:10.1007/10_2008_26 ISBN:978-981-13-6381-8
1701	Russula cyanoxantha	MSID000109	(2S,3S,4R,2’R)-2-(2’-hydroxytetracosanoylamino)oct-adecane-1,3,4-triol	DOI:10.1007/10_2008_26
1702	Russula cyanoxantha	MSID000285	Ergosterol peroxide	DOI:10.1007/10_2008_26
1703	Russula delica	MSID000187	2,9-Epoxydeliquinone	DOI:10.3891/acta.chem.scand.52-1333
1704	Russula delica	MSID000594	Deliquinone	DOI:10.3891/acta.chem.scand.52-1333
1705	Russula delica	MSID000631	Epiplorantinone B	DOI:10.3891/acta.chem.scand.52-1333
1706	Russula delica	MSID001312	Plorantinone D	DOI:10.3891/acta.chem.scand.52-1333
1707	Russula delica	MSID001402	Stearoyldelicone	DOI:10.1016/S0040-4039(97)10125-3
1708	Russula rosea	MSID000081	(+)-1,2-Didehydro-9-hydroxy-aristlone	PMID:27066716
1709	Russula rosea	MSID000096	(24E)-3,4-hydroxycucurbita-5,24-diene-26-oic acid	DOI:10.1007/10_2008_26 DOI:10.1002/1522-2675(20001220)83
1710	Russula rosea	MSID000097	(24E)-3,4-seco-cucurbita-4,24-diene-3-hydroxy-26,29-dioic acid	PMID:27066716
1711	Russula rosea	MSID000098	(24E)-3,4-seco-cucurbita-4,24-diene-3,26,29-trioic acid	PMID:27066716 DOI:10.1007/10_2008_26 DOI:10.1002/1522-2675(20001220)83
1712	Russula rosea	MSID000099	(24E)-3,4-secocucur-bita-4,24-diene-3,26-dioic acid	DOI:10.1007/10_2008_26 DOI:10.1002/1522-2675(20001220)83
1713	Russula rosea	MSID000109	(2S,3S,4R,2’R)-2-(2’-hydroxytetracosanoylamino)oct-adecane-1,3,4-triol	DOI:10.1007/10_2008_26
1714	Russula rosea	MSID000234	3,4-Secocucurbita-4,24e-diene-3-hydroxy-26-carboxylic acid	PMID:22938994
1715	Russula rosea	MSID001114	Lepidamine	DOI:10.1007/10_2008_26 DOI:10.1002/hlca.200390032
1716	Russula rosea	MSID001115	Lepidolide	DOI:10.1007/10_2008_26
1717	Russula rosea	MSID001359	Rulepidadiene A	DOI:10.1016/s0040-4039(98)01251-9
1718	Russula rosea	MSID001360	Rulepidadiene B	DOI:10.1016/s0040-4039(98)01251-9
1719	Russula rosea	MSID001361	Rulepidadiol	DOI:10.1007/10_2008_26 DOI:10.1002/1522-2675(20001220)83
1720	Russula rosea	MSID001362	Rulepidanol	DOI:10.1016/s0040-4039(98)01251-9
1721	Russula rosea	MSID001363	Rulepidatriol	DOI:10.1007/10_2008_26 DOI:10.1002/1522-2675(20001220)83
1722	Russula rosea	MSID001364	Rulepidol	DOI:10.1007/10_2008_26 DOI:10.5281/zenodo.3541291
1723	Russula rosea	MSID001474	(+)-13-Hydroxy-aristlone	PMID:27066716
1724	Russula rosea	MSID001475	(+)-Aristlone	PMID:27066716
1725	Sanghuangporus baumii	MSID000424	Baumin	PMID:20708931
1726	Sanghuangporus baumii	MSID000571	Cyclophellitol	PMID:2106502
1727	Sanghuangporus baumii	MSID000625	Epi-methylphelligrin A	PMID:21531558
1728	Sanghuangporus baumii	MSID000626	Epi-methylphelligrin B	PMID:21531558
1729	Sanghuangporus baumii	MSID000627	Methylphelligrin B	PMID:21531558
1730	Sanghuangporus baumii	MSID000628	Epi-phelligrin A	DOI:10.5281/zenodo.3541232
1731	Sanghuangporus baumii	MSID001266	Phellibaumin A	PMID:21531558
1732	Sanghuangporus baumii	MSID001267	Phellibaumin B	PMID:21531558
1733	Sanghuangporus baumii	MSID001268	Phellibaumin C	PMID:21531558
1734	Sanghuangporus baumii	MSID001269	Phellibaumin D	PMID:21531558
1735	Sanghuangporus baumii	MSID001270	Phellibaumin E	PMID:21531558
1736	Sanghuangporus baumii	MSID001288	Phellinsin A	PMID:11099223
1737	Sanghuangporus vaninii	MSID001059	Inonolane A	DOI:10.1007/s10600-013-0576-2
1738	Sarcodon cyrneus	MSID000572	Cyrneine A	PMID:24654802 PMID:16881016
1739	Sarcodon cyrneus	MSID000573	Cyrneine B	PMID:24654802 PMID:16881016
1740	Sarcodon cyrneus	MSID000574	Cyrneine C	PMID:17320402
1741	Sarcodon cyrneus	MSID000575	Cyrneine D	PMID:17320402
1742	Sarcodon cyrneus	MSID000995	Glaucopine C	PMID:16854719
1743	Sarcodon glaucopus	MSID000572	Cyrneine A	PMID:24654802
1744	Sarcodon glaucopus	MSID000573	Cyrneine B	PMID:24654802
1745	Sarcodon glaucopus	MSID000574	Cyrneine C	PMID:24654802
1746	Sarcodon glaucopus	MSID000994	Glaucopine A	PMID:15729633
1747	Sarcodon imbricatus	MSID000285	Ergosterol peroxide	DOI:10.5772/27477
1748	Sarcodon imbricatus	MSID001103	L-ergothioneine	ISBN:978-981-13-6381-8
1749	Sarcodon laevigatus	MSID001369	Sarcodan	DOI:10.1007/10_2008_26 PMID:16721876
1750	Sarcodon scabrosus	MSID000158	19- O-oleoylsarcodonin A	PMID:15215604
1751	Sarcodon scabrosus	MSID000162	19-O-linoleoylsarcodonin A	PMID:15215604
1752	Sarcodon scabrosus	MSID000163	19-O-stearoylsarcodonin A	PMID:15215604
1753	Sarcodon scabrosus	MSID000564	Neosarcodonin O	PMID:15215604
1754	Sarcodon scabrosus	MSID001216	Neosarcodonin A	PMID:11866103
1755	Sarcodon scabrosus	MSID001370	Sarcodonin G	DOI:10.1080/00021369.1989.10869820
1756	Sarcodon scabrosus	MSID001371	Sarcodonin I	DOI:10.1007/10_2008_26 PMID:16028205
1757	Sarcodon scabrosus	MSID001372	Scabronine A	DOI:10.1016/s0040-4020(98)83045-7 PMID:24654802
1758	Sarcodon scabrosus	MSID001373	Scabronine B	DOI:10.1016/s0040-4020(98)83045-7 PMID:24654802
1759	Sarcodon scabrosus	MSID001374	Scabronine C	DOI:10.1016/s0040-4020(98)83045-7 PMID:24654802
1760	Sarcodon scabrosus	MSID001375	Scabronine D	DOI:10.1016/s0040-4020(98)83045-7 PMID:24654802
1761	Sarcodon scabrosus	MSID001376	Scabronine E	DOI:10.1016/s0040-4020(98)83045-7 PMID:24654802
1762	Sarcodon scabrosus	MSID001377	Scabronine F	DOI:10.1016/s0040-4020(98)83045-7 PMID:24654802
1763	Sarcodon scabrosus	MSID001378	Scabronine G	DOI:10.1080/00021369.1989.10869820 PMID:24654802 DOI:10.1007/10_2008_26
1764	Sarcodon scabrosus	MSID001379	Scabronine H	DOI:10.1002/hlca.200490259 DOI:10.1007/10_2008_26
1765	Sarcodon scabrosus	MSID001380	Scabronine J	PMID:18408328
1766	Sarcodon scabrosus	MSID001381	Scabronine K	PMID:24654802 PMID:21530015
1767	Sarcodon scabrosus	MSID001382	Scabronine L	PMID:24654802 PMID:21530015
1768	Sarcodon scabrosus	MSID001626	Secoscabronine M	PMID:24654802
1769	Sarcodon scabrosus	MSID001708	Neosarcodonin C	PMID:11866103
1770	Schizophyllum commune	MSID000265	4-Hydroxybenzoic acid	DOI:10.1016/S1875-5364(16)30078-4
1771	Schizophyllum commune	MSID000504	Compactin	PMID:4040510
1772	Schizophyllum commune	MSID001127	Lovastatin	PMID:4040510
1773	Schizophyllum commune	MSID001161	M-hydroxybenzoic acid	DOI:10.1016/S1875-5364(16)30078-4
1774	Schizophyllum commune	MSID001162	Mannonerolidol	PMID:30542161
1775	Schizophyllum commune	MSID001218	O-hydroxybenzeneacetic acid	DOI:10.1016/S1875-5364(16)30078-4
1776	Schizophyllum commune	MSID001384	Schizine A	PMID:25951057
1777	Schizophyllum commune	MSID001385	Schizine B	PMID:25951057
1778	Schizophyllum commune	MSID001386	Schizostatin	PMID:8784420 PMID:8784419
1779	Schizophyllum commune	MSID001466	Vanillic acid	DOI:10.1016/S1875-5364(16)30078-4
1780	Schizophyllum commune	MSID001502	3-Hydroxy-5-methybenzoic acid	DOI:10.1016/S1875-5364(16)30078-4
1781	Shiraia bambusicola	MSID001035	Hypocrellin A	DOI:10.1360/sb1981-26-11-1040
1782	Shiraia bambusicola	MSID001036	Hypocrellin D	PMID:16915819
1783	Shiraia bambusicola	MSID001641	Hypocrellin B	PMID:1775581
1784	Sparassis crispa	MSID000113	(3R*,3aS*,4S*,8aR*)-3-(10-hydroxy-10-methylethyl)-5,8a-dimethyldecahydroazulen-4-ol	PMID:19129625
1785	Sparassis crispa	MSID000299	7-Ergostenol	PMID:4559567
1786	Sparassis crispa	MSID001003	Hanabiratakelide A	PMID:20686231
1787	Sparassis crispa	MSID001004	Hanabiratakelide B	PMID:20686231
1788	Sparassis crispa	MSID001005	Hanabiratakelide C	PMID:20686231
1789	Sparassis crispa	MSID001103	L-ergothioneine	ISBN:978-981-13-6381-8
1790	Stereum hirsutum	MSID000119	(E)-beta-caryophyllene	ISBN:978-981-10-5977-3
1791	Stereum hirsutum	MSID000175	2-Hydroxy-5-methoxy-6-(3-methylbut-3-en-1-ynyl)benzylalcohol	DOI:10.1016/s0031-9422(99)00565-8
1792	Stereum hirsutum	MSID000185	2,5-Dihydroxy-3-isopropenyl-6-(3-methylbut-3-en-1-ynyl)benzaldehyde	DOI:10.1016/s0031-9422(99)00565-8
1793	Stereum hirsutum	MSID000263	4-Hydroxy-3-methoxy-2-(3-methylbut-2-en-1-yl)phenyl 2,4-dihydroxy-6-methylbenzoate	PMID:24054236
1794	Stereum hirsutum	MSID000325	Alpha-humulene	ISBN:978-981-10-5977-3
1795	Stereum hirsutum	MSID000433	beta-Elemene	ISBN:978-981-10-5977-3
1796	Stereum hirsutum	MSID000595	Delta-cadinene	ISBN:978-981-10-5977-3
1797	Stereum hirsutum	MSID000596	Delta6-protoilludene	ISBN:978-981-10-5977-3
1798	Stereum hirsutum	MSID000630	Epicorazine C	PMID:11513044
1799	Stereum hirsutum	MSID001023	Hirsutene	ISBN:978-981-10-5977-3
1800	Stereum hirsutum	MSID001024	Hirsutenol A	PMID:12027770
1801	Stereum hirsutum	MSID001025	Hirsutenol B	PMID:12027770
1802	Stereum hirsutum	MSID001026	Hirsutenol C	PMID:12027770
1803	Stereum hirsutum	MSID001027	Hirsutenol D	PMID:16629412
1804	Stereum hirsutum	MSID001028	Hirsutenol E	PMID:16629412
1805	Stereum hirsutum	MSID001029	Hirsutenol F	PMID:16629412
1806	Stereum hirsutum	MSID001264	Pentalene	ISBN:978-981-10-5977-3
1807	Stereum hirsutum	MSID001403	Sterehirsutinal	DOI:10.1016/s0031-9422(99)00565-8
1808	Stereum hirsutum	MSID001404	Sterehirsutinol	DOI:10.1016/s0031-9422(99)00565-8
1809	Stereum hirsutum	MSID001405	Sterenin E	PMID:25029175
1810	Stereum hirsutum	MSID001406	Sterenin F	PMID:25029175
1811	Stereum hirsutum	MSID001407	Sterenin G	PMID:25029175
1812	Stereum hirsutum	MSID001408	Sterenin H	PMID:25029175
1813	Stereum hirsutum	MSID001409	Sterenin I	PMID:25029175
1814	Stereum hirsutum	MSID001410	Sterenin J	PMID:25029175
1815	Stereum hirsutum	MSID001411	Sterenin K	PMID:25029175
1816	Stereum hirsutum	MSID001412	Sterenin L	PMID:25029175
1817	Stereum hirsutum	MSID001413	Sterenin M	PMID:25029175
1818	Stereum hirsutum	MSID001414	Sterhirsutin A	PMID:25215649
1819	Stereum hirsutum	MSID001415	Sterhirsutin B	PMID:25215649
1820	Stereum hirsutum	MSID001416	Sterhirsutin E	PMID:26068271
1821	Stereum hirsutum	MSID001417	Sterhirsutin F	PMID:26068271
1822	Stereum hirsutum	MSID001418	Sterhirsutin G	PMID:26068271
1823	Stereum hirsutum	MSID001419	Sterhirsutin H	PMID:26068271
1824	Stereum hirsutum	MSID001420	Sterhirsutin I	PMID:26068271
1825	Stereum hirsutum	MSID001421	Sterhirsutin J	PMID:26068271
1826	Stereum hirsutum	MSID001422	Sterhirsutin K	PMID:26068271
1827	Stereum hirsutum	MSID001423	Sterin A	PMID:12003003
1828	Stereum hirsutum	MSID001424	Sterin B	PMID:12003003
1829	Stereum ostrea	MSID001229	Ostalactone A	PMID:28006918
1830	Stereum ostrea	MSID001230	Ostalactone B	PMID:28006918
1831	Stereum ostrea	MSID001231	Ostalactone C	PMID:28006918
1832	Stereum ostrea	MSID001425	Sterostrein A	PMID:29749562
1833	Stereum ostrea	MSID001426	Sterostrein O	PMID:22595359
1834	Stereum ostrea	MSID001802	Methoxylaricinolic acid	PMID:17025020
1835	Stropharia rugosoannulata	MSID001430	Strophasterol A	PMID:23012134
1836	Stropharia rugosoannulata	MSID001431	Strophasterol B	DOI:10.1002/ange.201205351
1837	Stropharia rugosoannulata	MSID001432	Strophasterol C	PMID:23012134
1838	Suillus flavus	MSID001602	Iso-suillin	ISBN:978-981-13-6381-8
1839	Suillus granulatus	MSID000742	Flazin	DOI:10.1007/10_2008_26
1840	Suillus granulatus	MSID001103	L-ergothioneine	ISBN:978-981-13-6381-8
1841	Suillus granulatus	MSID001434	Suillusin	PMID:11575963
1842	Suillus luteus	MSID001103	L-ergothioneine	ISBN:978-981-13-6381-8
1843	Suillus luteus	MSID001602	Iso-suillin	ISBN:978-981-13-6381-8
1844	Suillus placidus	MSID001433	Suillin	ISBN:978-981-13-6381-8
1845	Taiwanofungus camphoratus	MSID000102	(25R)-antcin C	DOI:10.1016/S1875-5364(19)30007-X
1846	Taiwanofungus camphoratus	MSID000103	(25S)-antcin C	DOI:10.1016/S1875-5364(19)30007-X
1847	Taiwanofungus camphoratus	MSID000105	Camphoratin G	PMID:21028898
1848	Taiwanofungus camphoratus	MSID000106	(25R)-antcin K	DOI:10.1016/S1875-5364(19)30007-X
1849	Taiwanofungus camphoratus	MSID000107	(25S)-antcin K	DOI:10.1016/S1875-5364(19)30007-X
1850	Taiwanofungus camphoratus	MSID000120	Anticin A	DOI:10.1021/np50117a004
1851	Taiwanofungus camphoratus	MSID000135	1-Naphthalenecarboxaldehyde,3,4,4a,5,6,7,8,8a-octahydro-2-(hydroxymethyl)-5,5,8a-trimethyl	PMID:28768421
1852	Taiwanofungus camphoratus	MSID000147	12-Hydroxydodecanoic acid methyl ester	PMID:18855215
1853	Taiwanofungus camphoratus	MSID000150	14-Deoxy-11,12-didehydroandrographolide	PMID:16643055 PMID:24654802
1854	Taiwanofungus camphoratus	MSID000151	14-Deoxyandrographolide	PMID:16643055
1855	Taiwanofungus camphoratus	MSID000153	15-O-acetylganolucidate A	PMID:23517145
1856	Taiwanofungus camphoratus	MSID000159	19-Hydroxylabda-8(17)-en-16,15-olide	PMID:16643055 PMID:24654802
1857	Taiwanofungus camphoratus	MSID000160	19-Hydroxylabda-8(17),13-dien-16,15-olid	PMID:16643055 PMID:24654802
1858	Taiwanofungus camphoratus	MSID000168	2-(2-Hydroxyethyl)phenol	PMID:18855215
1859	Taiwanofungus camphoratus	MSID000170	2-(4-Methyl-l-cyclohex-3-enyl)propan-2-ol(alpha-terpineol)	PMID:25892909
1860	Taiwanofungus camphoratus	MSID000179	2,3,4,5-Tetramethoxybenzoyl chloride	PMID:17559265
1861	Taiwanofungus camphoratus	MSID000213	3-(4-Methoxy-2-oxo-2h-pyran-6-yl)-propanoic acid	PMID:23517145
1862	Taiwanofungus camphoratus	MSID000222	3-Isobutyl-4-[4-(3-methyl-2-butenyloxy)phenyl]-1h-pyrrol-1-ol-2,5-dione	PMID:24871446 PMID:14738384
1863	Taiwanofungus camphoratus	MSID000223	3-Isobutyl-4-[4-(3-methyl-2-butenyloxy)phenyl]-1h-pyrrole-2,5-dione	PMID:14738384
1864	Taiwanofungus camphoratus	MSID000224	3-Isobutyl-4-[4-(3-methyl-2-butenyloxy)phenyl]furan-2,5-dione	PMID:14738384
1865	Taiwanofungus camphoratus	MSID000248	3R*,4R*-1-hydroxy-3-isobutyl-4-[4-(3-methyl-2-butenyloxy)phenyl]pyrrolidine-2,5-dione	PMID:14738384
1866	Taiwanofungus camphoratus	MSID000249	Antrodin E	PMID:14738384
1867	Taiwanofungus camphoratus	MSID000266	4-Hydroxysesamin	PMID:19687189
1868	Taiwanofungus camphoratus	MSID000271	4,4'-(Ethane-1,2-diyl)bis(2,3,6-trimethoxyphenol)	PMID:25532837
1869	Taiwanofungus camphoratus	MSID000280	5-Hydroxy-5-(methoxymethyl)-4-methylfuran-2(5h)-one	PMID:23517145
1870	Taiwanofungus camphoratus	MSID000291	6-Methoxy-4-methyl-2,3-(methylenedioxy)phenol	PMID:25532837
1871	Taiwanofungus camphoratus	MSID000330	Antcamphin E	DOI:10.1016/S1875-5364(19)30007-X
1872	Taiwanofungus camphoratus	MSID000331	Antcamphin F	DOI:10.1016/S1875-5364(19)30007-X
1873	Taiwanofungus camphoratus	MSID000332	Antcamphin I	PMID:24387703
1874	Taiwanofungus camphoratus	MSID000333	Antcamphin J	PMID:24387703
1875	Taiwanofungus camphoratus	MSID000334	Antcin B	DOI:10.1016/S1875-5364(19)30007-X
1876	Taiwanofungus camphoratus	MSID000335	Zhankuic acid A	PMID:24532584
1877	Taiwanofungus camphoratus	MSID000338	Camphoratin B	PMID:21028898
1878	Taiwanofungus camphoratus	MSID000344	Antrocamol LT2	PMID:25721423
1879	Taiwanofungus camphoratus	MSID000345	Antrocamol LT3	PMID:25721423
1880	Taiwanofungus camphoratus	MSID000346	Antrocamphin A	PMID:17559265
1881	Taiwanofungus camphoratus	MSID000347	Antrocamphin B	PMID:17559265
1882	Taiwanofungus camphoratus	MSID000353	Antrodioxolanone	PMID:17559265
1883	Taiwanofungus camphoratus	MSID000354	Antroquinonol	PMID:17932820
1884	Taiwanofungus camphoratus	MSID000426	Benzocamphorin A	PMID:21115251
1885	Taiwanofungus camphoratus	MSID000427	Benzocamphorin B	PMID:21115251
1886	Taiwanofungus camphoratus	MSID000428	Benzocamphorin D	PMID:21115251
1887	Taiwanofungus camphoratus	MSID000429	Benzocamphorin E	PMID:21115251
1888	Taiwanofungus camphoratus	MSID000430	Benzocamphorin H	DOI:10.1016/j.tetlet.2012.08.138
1889	Taiwanofungus camphoratus	MSID000462	Camphoratin A	PMID:21028898
1890	Taiwanofungus camphoratus	MSID000463	Camphoratin C	PMID:21028898
1891	Taiwanofungus camphoratus	MSID000464	Camphoratin D	PMID:21028898 DOI:10.1016/S1875-5364(19)30007-X
1892	Taiwanofungus camphoratus	MSID000465	Camphoratin E	PMID:21028898
1893	Taiwanofungus camphoratus	MSID000466	Camphoratin F	PMID:21028898
1894	Taiwanofungus camphoratus	MSID000467	Camphoratin H	PMID:21028898
1895	Taiwanofungus camphoratus	MSID000468	Camphoratin I	PMID:21028898
1896	Taiwanofungus camphoratus	MSID000469	Camphoratin J	PMID:21028898
1897	Taiwanofungus camphoratus	MSID000470	Methyl antcinate A	ISBN:978-981-13-6381-8
1898	Taiwanofungus camphoratus	MSID000471	Camphosterol A	PMID:22999074
1899	Taiwanofungus camphoratus	MSID000490	Cis-3-(4-hydroxyphenyl)-4-isobutyldihydrofuran-2,5-dione	PMID:18642845
1900	Taiwanofungus camphoratus	MSID000588	Dehydroeburicoic acid	DOI:10.1016/S1875-5364(19)30007-X
1901	Taiwanofungus camphoratus	MSID000605	Eburicoic acid	DOI:10.1016/S1875-5364(19)30007-X
1902	Taiwanofungus camphoratus	MSID000637	Ergosta-5,7,22-trien-3β-ol(ergosterol)	DOI:10.1016/S1875-5364(19)30007-X
1903	Taiwanofungus camphoratus	MSID000707	Ethyl lucidenate F	PMID:23517145
1904	Taiwanofungus camphoratus	MSID000746	Sulphurenic acid	DOI:10.1016/S1875-5364(19)30007-X
1905	Taiwanofungus camphoratus	MSID001104	1-Methyl-4-(prop-1-en-2-yl)-cyclohexan-1-ol(β-Terpineol)	PMID:25892909
1906	Taiwanofungus camphoratus	MSID001181	Methyl antcinate B	PMID:8594142 PMID:23431343
1907	Taiwanofungus camphoratus	MSID001454	Trans-1-hydroxy-3-(4-hydroxyphenyl)-4-isobutylpyrrolidine-2,5-dione	PMID:18642845
1908	Taiwanofungus camphoratus	MSID001468	Versisponic acid D	DOI:10.1016/S1875-5364(19)30007-X
1909	Taiwanofungus camphoratus	MSID001476	(25R)-camphoratins C	DOI:10.1016/S1875-5364(19)30007-X
1910	Taiwanofungus camphoratus	MSID001477	(25S)-camphoratins C	DOI:10.1016/S1875-5364(19)30007-X
1911	Taiwanofungus camphoratus	MSID001478	(25R)-methyl antcinate K	DOI:10.1016/S1875-5364(19)30007-X
1912	Taiwanofungus camphoratus	MSID001481	Methyl antcinate K	DOI:10.1016/S1875-5364(19)30007-X
1913	Taiwanofungus camphoratus	MSID001487	13-Epi-3b,19-dihydroxylabda-8(17),11e-dien-16,15-olide	PMID:24654802
1914	Taiwanofungus camphoratus	MSID001488	3b,19-Dihydroxylabda-8(17),11e-dien-16,15-olide	PMID:24654802
1915	Taiwanofungus camphoratus	MSID001541	Antcamphorol A	PMID:31891260
1916	Taiwanofungus camphoratus	MSID001542	Antcamphorol B	PMID:31891260
1917	Taiwanofungus camphoratus	MSID001543	Antcamphorol C	PMID:31891260
1918	Taiwanofungus camphoratus	MSID001544	Antcamphorol D	PMID:31891260
1919	Taiwanofungus camphoratus	MSID001545	Antcamphorol E	PMID:31891260
1920	Taiwanofungus camphoratus	MSID001546	Antcamphorol F	PMID:31891260
1921	Taiwanofungus camphoratus	MSID001547	Antcamphorol G	PMID:31891260
1922	Taiwanofungus camphoratus	MSID001548	Antcamphorol H	PMID:31891260
1923	Taiwanofungus camphoratus	MSID001549	Antcamphorol I	PMID:31891260
1924	Taiwanofungus camphoratus	MSID001550	Antcamphorol J	PMID:31891260
1925	Taiwanofungus camphoratus	MSID001551	Antcamphorol K	PMID:31891260
1926	Taiwanofungus camphoratus	MSID001552	Antcin G	DOI:10.1016/S1875-5364(19)30007-X
1927	Taiwanofungus camphoratus	MSID001800	11-Hydroxy-γ-dodecalactone	PMID:18855215
1928	Taiwanofungus camphoratus	MSID001827	Antrocamol LT1	PMID:25721423
1929	Taiwanofungus salmoneus	MSID000104	Antcin C	PMID:31883608
1930	Taiwanofungus salmoneus	MSID000108	Antcin K	PMID:31883608
1931	Taiwanofungus salmoneus	MSID000120	Anticin A	PMID:31883608
1932	Taiwanofungus salmoneus	MSID000181	2,4-Dimethoxy-6-methylbenzene-1,3-diol	DOI:10.1002/jccs.200800127
1933	Taiwanofungus salmoneus	MSID000212	3-(4-Hydroxyphenyl)-4-isobutyl-1h-pyrrole-2,5-dione	DOI:10.1002/jccs.200800127
1934	Taiwanofungus salmoneus	MSID000334	Antcin B	PMID:31883608
1935	Taiwanofungus salmoneus	MSID000339	Antcin D	PMID:31883608
1936	Taiwanofungus salmoneus	MSID000340	Antcin E	PMID:31883608
1937	Taiwanofungus salmoneus	MSID000341	Antcin F	PMID:31883608
1938	Taiwanofungus salmoneus	MSID000342	Antcin H	PMID:31883608
1939	Taiwanofungus salmoneus	MSID000343	Antcin I	PMID:31883608
1940	Taiwanofungus salmoneus	MSID000470	Methyl antcinate A	PMID:31883608
1941	Taiwanofungus salmoneus	MSID001181	Methyl antcinate B	PMID:31883608
1942	Taiwanofungus salmoneus	MSID001182	Methyl antcinate G	PMID:31883608
1943	Taiwanofungus salmoneus	MSID001183	Methyl antcinate H	PMID:31883608
1944	Taiwanofungus salmoneus	MSID001367	Salmoquinone	DOI:10.1002/jccs.200800127
1945	Taiwanofungus salmoneus	MSID001481	Methyl antcinate K	PMID:31883608
1946	Taiwanofungus salmoneus	MSID001553	Antcin M	PMID:31883608
1947	Taiwanofungus salmoneus	MSID001554	Antcin N	PMID:31883608
1948	Taiwanofungus salmoneus	MSID001829	Methyl antcinate L	PMID:31883608
1949	Taiwanofungus salmoneus	MSID001830	Methyl antcinate N	PMID:31883608
1950	Tapinella panuoides	MSID001263	Paxillamide	DOI:10.1002/hlca.200490134
1951	Termitomyces heimii	MSID000161	Neoergosterol	PMID:32340227
1952	Termitomyces heimii	MSID000299	7-Ergostenol	PMID:32340227
1953	Termitomyces heimii	MSID000451	Brassicasterol	PMID:32340227
1954	Termitomyces heimii	MSID000488	Cinnamic acid	PMID:32340227
1955	Termitomyces heimii	MSID000639	Ergosta-5,8-dien-3-ol	PMID:32340227
1956	Termitomyces heimii	MSID000640	Ergosta-5,8(14)-dien-3-ol	PMID:32340227
1957	Termitomyces microcarpus	MSID000284	5a,8a-Epidioxyergosta-6,9(11),22-trien-3	PMID:29704040
1958	Termitomyces microcarpus	MSID000285	Ergosterol peroxide	PMID:29704040
1959	Termitomyces microcarpus	MSID001529	5α,6α-Epoxy-(22e,24r)-ergosta-8(14),22-diene-3β,7α-diol	PMID:29704040
1960	Termitomyces microcarpus	MSID001814	Cerebroside	PMID:29704040
1961	Termitomyces titanicus	MSID001441	Termitomycamide A	PMID:20936815 PMID:24654802
1962	Termitomyces titanicus	MSID001442	Termitomycamide D	PMID:20936815 PMID:24654802
1963	Termitomyces titanicus	MSID001443	Termitomycamide E	PMID:20936815 PMID:24654802
1964	Termitomyces titanicus	MSID001634	Termitomycamide C	PMID:24654802
1965	Termitomyces titanicus	MSID001772	Termitomycamide B	PMID:20936815 PMID:24654802
1966	Tolypocladium ophioglossoides	MSID000534	Cordycepol A	DOI:10.1002/hlca.201200068
1967	Tolypocladium ophioglossoides	MSID000535	Cordycepol B	DOI:10.1002/hlca.201200068
1968	Tolypocladium ophioglossoides	MSID000536	Cordycepol C	DOI:10.1002/hlca.201200068
1969	Tolypocladium ophioglossoides	MSID000537	Cordycol	DOI:10.1002/hlca.201200068
1970	Trametes hirsuta	MSID000472	Camptothecin	DOI:10.1007/10_2008_26
1971	Trametes pubescens	MSID001455	Trans-2,3-epoxydeca-4,6,8-triyn-1-ol	PMID:8201314
1972	Trametes trogii	MSID000786	Funatrol A	PMID:23795565
1973	Trametes trogii	MSID000787	Funatrol B	PMID:23795565
1974	Trametes trogii	MSID000788	Funatrol C	PMID:23795565
1975	Trametes trogii	MSID000789	Funatrol D	PMID:23795565
1976	Trametes versicolor	MSID000001	Trametenolic acid B	PMID:29749562
1977	Trametes versicolor	MSID000074	(-)-Ternatin	DOI:10.1016/j.tetlet.2006.04.073
1978	Trametes versicolor	MSID000253	3β-Linoleyloxyergosta-7,22-diene	PMID:25954909
1979	Trametes versicolor	MSID000285	Ergosterol peroxide	PMID:29749562
1980	Trametes versicolor	MSID001358	Rosenonolactone 15,16-acetonide E	PMID:26136058
1981	Trametes versicolor	MSID001450	Tramspiroin A	PMID:26136058
1982	Trametes versicolor	MSID001451	Tramspiroin B	PMID:26136058
1983	Trametes versicolor	MSID001452	Tramspiroin C	PMID:26136058
1984	Trametes versicolor	MSID001453	Tramspiroin D	PMID:26136058
1985	Trametes versicolor	MSID001814	Cerebroside	PMID:25954909
1986	Tremella fuciformis	MSID000184	2,5-Dihydroxy benzoic acid	PMID:24547933
1987	Tremella fuciformis	MSID000262	4-Coumaric acid	PMID:24547933
1988	Tremella fuciformis	MSID000265	4-Hydroxybenzoic acid	PMID:24547933
1989	Tricholoma matsutake	MSID001103	L-ergothioneine	ISBN:978-981-13-6381-8
1990	Tricholoma matsutake	MSID001164	Pleurocin A	PMID:28691489
1991	Tricholoma matsutake	MSID001165	Matsutoic acid	PMID:28691489
1992	Tricholoma pardinum	MSID001255	Pardinol A	PMID:29758519 ISBN:978-981-13-6381-8
1993	Tricholoma pardinum	MSID001256	Pardinol B	PMID:29758519 ISBN:978-981-13-6381-8
1994	Tricholoma pardinum	MSID001257	Pardinol C	PMID:29758519 ISBN:978-981-13-6381-8
1995	Tricholoma pardinum	MSID001258	Pardinol D	PMID:29758519 ISBN:978-981-13-6381-8
1996	Tricholoma pardinum	MSID001259	Pardinol E	PMID:29758519 ISBN:978-981-13-6381-8
1997	Tricholoma pardinum	MSID001260	Pardinol F	PMID:29758519 ISBN:978-981-13-6381-8
1998	Tricholoma pardinum	MSID001261	Pardinol G	PMID:29758519 ISBN:978-981-13-6381-8
[truncated: 129 more rows]

## Sheet: Table S5
Table S5. The table gives the PubChem compound identifier, Chemical formula, Chemical structure in SMILES format, InChI format and InChIKey format, and Chemical classification as Kingdom, Superclass, Class and Subclass of 1830 secondary metabolites in MeFSAT database.
Serial Number	Secondary Metabolite Identifier	Secondary Metabolite Name	PubChem Compound Identifier	Chemical Formula	SMILES	InChI	InChIKey	Kingdom	Superclass	Class	Subclass
1	MSID000001	Trametenolic acid B	CID_12309443	C30H48O3	CC(=CCC[C@H]([C@H]1CC[C@@]2([C@]1(C)CCC1=C2CC[C@@H]2[C@]1(C)CC[C@@H](C2(C)C)O)C)C(=O)O)C	InChI=1S/C30H48O3/c1-19(2)9-8-10-20(26(32)33)21-13-17-30(7)23-11-12-24-27(3,4)25(31)15-16-28(24,5)22(23)14-18-29(21,30)6/h9,20-21,24-25,31H,8,10-18H2,1-7H3,(H,32,33)/t20-,21-,24+,25+,28-,29-,30+/m1/s1	NBSBUIQBEPROBM-GIICLEHTSA-N	Organic compounds	Lipids and lipid-like molecules	Prenol lipids	Triterpenoids
2	MSID000002	(3.β)-Lanost-8-en-3-ol,24-methylene		C31H52O	CC(C(=C)CCC(C1CCC2(C1(C)CCC1=C2CCC2C1(C)CCC(C2(C)C)O)C)C)C	InChI=1S/C31H52O/c1-20(2)21(3)10-11-22(4)23-14-18-31(9)25-12-13-26-28(5,6)27(32)16-17-29(26,7)24(25)15-19-30(23,31)8/h20,22-23,26-27,32H,3,10-19H2,1-2,4-9H3	XJLZCPIILZRCPS-UHFFFAOYSA-N	Organic compounds	Lipids and lipid-like molecules	Prenol lipids	Triterpenoids
3	MSID000003	Cerevisterol	CID_10181133	C28H46O3	O[C@H]1CC[C@]2([C@@](C1)(O)[C@H](O)C=C1[C@@H]2CC[C@]2([C@H]1CC[C@@H]2[C@@H](/C=C/[C@@H](C(C)C)C)C)C)C	InChI=1S/C28H46O3/c1-17(2)18(3)7-8-19(4)22-9-10-23-21-15-25(30)28(31)16-20(29)11-14-27(28,6)24(21)12-13-26(22,23)5/h7-8,15,17-20,22-25,29-31H,9-14,16H2,1-6H3/b8-7+/t18-,19+,20-,22+,23-,24-,25+,26+,27+,28-/m0/s1	ARXHRTZAVQOQEU-BRVLHLJYSA-N	Organic compounds	Lipids and lipid-like molecules	Steroids and steroid derivatives	Ergostane steroids
4	MSID000004	Tsugaric acid D		C32H48O5	CC(=CCC(=O)[C@H]([C@H]1CC[C@@]2([C@]1(C)CCC1=C2CC[C@@H]2[C@]1(C)CC[C@H](C2(C)C)OC(=O)C)C)C(=O)O)C	InChI=1S/C32H48O5/c1-19(2)9-11-24(34)27(28(35)36)23-14-18-31(7)22-10-12-25-29(4,5)26(37-20(3)33)15-16-30(25,6)21(22)13-17-32(23,31)8/h9,23,25-27H,10-18H2,1-8H3,(H,35,36)/t23-,25+,26-,27+,30-,31+,32-/m1/s1	YOZMIRKSGPYKDL-KKMRMNOUSA-N	Organic compounds	Lipids and lipid-like molecules	Prenol lipids	Triterpenoids
5	MSID000005	Tsugaric acid E		C31H46O4	CC(C(=C)CC[C@H]([C@H]1[C@H](O)C[C@@]2([C@]1(C)CCC1=C2C=C[C@@H]2[C@]1(C)CCC(=O)C2(C)C)C)C(=O)O)C	InChI=1S/C31H46O4/c1-18(2)19(3)9-10-20(27(34)35)26-23(32)17-31(8)22-11-12-24-28(4,5)25(33)14-15-29(24,6)21(22)13-16-30(26,31)7/h11-12,18,20,23-24,26,32H,3,9-10,13-17H2,1-2,4-8H3,(H,34,35)/t20-,23-,24+,26+,29-,30-,31+/m1/s1	QIKIIGSLIKGMIC-WMNQUVFJSA-N	Organic compounds	Lipids and lipid-like molecules	Prenol lipids	Triterpenoids
6	MSID000006	(-)-(2R,3S,6S,7S,9R)-tremul-1(10)-ene-11,12,14-triol	CID_46872580	C15H26O3	OC[C@H]1CC[C@@H]([C@H]2C(=C[C@](C2)(C)CO)[C@@H]1CO)C	InChI=1S/C15H26O3/c1-10-3-4-11(7-16)14(8-17)13-6-15(2,9-18)5-12(10)13/h6,10-12,14,16-18H,3-5,7-9H2,1-2H3/t10-,11+,12-,14+,15+/m0/s1	CXRTZNIGUJLOOU-SZWZKDINSA-N	Organic compounds	Organic oxygen compounds	Organooxygen compounds	Alcohols and polyols
7	MSID000007	(-)-(2S,3S,6S,7S,9R)-tremul-1(10)-ene-11,12,14-triol	CID_46872469	C15H26O3	OC[C@H]1CC[C@@H]([C@H]2C(=C[C@](C2)(C)CO)[C@H]1CO)C	InChI=1S/C15H26O3/c1-10-3-4-11(7-16)14(8-17)13-6-15(2,9-18)5-12(10)13/h6,10-12,14,16-18H,3-5,7-9H2,1-2H3/t10-,11+,12-,14-,15+/m0/s1	CXRTZNIGUJLOOU-CUZKYEQNSA-N	Organic compounds	Organic oxygen compounds	Organooxygen compounds	Alcohols and polyols
8	MSID000008	(-)-(2S,3S,6S,7S,9S)-tremul-1(10)-ene-11,12,15-triol	CID_46872579	C15H26O3	OC[C@H]1CC[C@@H]([C@H]2C(=C[C@@](C2)(C)CO)[C@H]1CO)C	InChI=1S/C15H26O3/c1-10-3-4-11(7-16)14(8-17)13-6-15(2,9-18)5-12(10)13/h6,10-12,14,16-18H,3-5,7-9H2,1-2H3/t10-,11+,12-,14-,15-/m0/s1	CXRTZNIGUJLOOU-XXUMUBMXSA-N	Organic compounds	Organic oxygen compounds	Organooxygen compounds	Alcohols and polyols
9	MSID000009	(-)-(2S,3S,4S,6S,7S)-tremul-1(10)-ene-4,11,12-triol	CID_46872581	C15H26O3	OC[C@H]1[C@@H](CO)[C@@H](O)C[C@@H]([C@H]2C1=CC(C2)(C)C)C	InChI=1S/C15H26O3/c1-9-4-14(18)13(8-17)12(7-16)11-6-15(2,3)5-10(9)11/h6,9-10,12-14,16-18H,4-5,7-8H2,1-3H3/t9-,10-,12+,13+,14-/m0/s1	ICVPRJWKJDJJOV-YRASXDPISA-N	Organic compounds	Organic oxygen compounds	Organooxygen compounds	Alcohols and polyols
10	MSID000010	(-)-Applanatumol D	CID_139587791	C17H16O8	O=C1O[C@H]2[C@]3([C@@H]1O)COC(=O)[C@@]3(CC2)CC(=O)c1cc(O)ccc1O	InChI=1S/C17H16O8/c18-8-1-2-10(19)9(5-8)11(20)6-16-4-3-12-17(16,7-24-15(16)23)13(21)14(22)25-12/h1-2,5,12-13,18-19,21H,3-4,6-7H2/t12-,13-,16-,17+/m1/s1	BKXWDIMPBHNMLN-KFZJALRRSA-N	Organic compounds	Organic oxygen compounds	Organooxygen compounds	Carbonyl compounds
11	MSID000011	(+)-Applanatumol D	CID_139587516	C17H16O8	O=C1O[C@@H]2[C@@]3([C@H]1O)COC(=O)[C@]3(CC2)CC(=O)c1cc(O)ccc1O	InChI=1S/C17H16O8/c18-8-1-2-10(19)9(5-8)11(20)6-16-4-3-12-17(16,7-24-15(16)23)13(21)14(22)25-12/h1-2,5,12-13,18-19,21H,3-4,6-7H2/t12-,13-,16-,17+/m0/s1	BKXWDIMPBHNMLN-MGBSGCIJSA-N	Organic compounds	Organic oxygen compounds	Organooxygen compounds	Carbonyl compounds
12	MSID000012	(-)-Applanatumol E	CID_132542814	C18H22O8	COC([C@]12COC(=O)[C@@]2(CC[C@@H]1O)CC(=O)c1cc(O)ccc1O)OC	InChI=1S/C18H22O8/c1-24-16(25-2)18-9-26-15(23)17(18,6-5-14(18)22)8-13(21)11-7-10(19)3-4-12(11)20/h3-4,7,14,16,19-20,22H,5-6,8-9H2,1-2H3/t14-,17+,18-/m0/s1	VCCZNZDGMFCWPD-QGTPRVQTSA-N	Organic compounds	Organic oxygen compounds	Organooxygen compounds	Carbonyl compounds
13	MSID000013	(-)-Applanatumol F	CID_132542815	C18H22O8	COC([C@]12COC(=O)[C@@]2(CC[C@H]1O)CC(=O)c1cc(O)ccc1O)OC	InChI=1S/C18H22O8/c1-24-16(25-2)18-9-26-15(23)17(18,6-5-14(18)22)8-13(21)11-7-10(19)3-4-12(11)20/h3-4,7,14,16,19-20,22H,5-6,8-9H2,1-2H3/t14-,17-,18+/m1/s1	VCCZNZDGMFCWPD-OLMNPRSZSA-N	Organic compounds	Organic oxygen compounds	Organooxygen compounds	Carbonyl compounds
14	MSID000014	(+)-Applanatumol E	CID_139586728	C18H22O8	COC([C@@]12COC(=O)[C@]2(CC[C@H]1O)CC(=O)c1cc(O)ccc1O)OC	InChI=1S/C18H22O8/c1-24-16(25-2)18-9-26-15(23)17(18,6-5-14(18)22)8-13(21)11-7-10(19)3-4-12(11)20/h3-4,7,14,16,19-20,22H,5-6,8-9H2,1-2H3/t14-,17+,18-/m1/s1	VCCZNZDGMFCWPD-FHLIZLRMSA-N	Organic compounds	Organic oxygen compounds	Organooxygen compounds	Carbonyl compounds
15	MSID000015	(+)-Applanatumol F	CID_139584676	C18H22O8	COC([C@@]12COC(=O)[C@]2(CC[C@@H]1O)CC(=O)c1cc(O)ccc1O)OC	InChI=1S/C18H22O8/c1-24-16(25-2)18-9-26-15(23)17(18,6-5-14(18)22)8-13(21)11-7-10(19)3-4-12(11)20/h3-4,7,14,16,19-20,22H,5-6,8-9H2,1-2H3/t14-,17-,18+/m0/s1	VCCZNZDGMFCWPD-JCGIZDLHSA-N	Organic compounds	Organic oxygen compounds	Organooxygen compounds	Carbonyl compounds
16	MSID000016	(-)-Applanatumol G	CID_132542816	C20H26O8	CCO[C@H]1CC[C@@]2([C@]1(COC2=O)C(OC)OC)CC(=O)c1cc(O)ccc1O	InChI=1S/C20H26O8/c1-4-27-16-7-8-19(10-15(23)13-9-12(21)5-6-14(13)22)17(24)28-11-20(16,19)18(25-2)26-3/h5-6,9,16,18,21-22H,4,7-8,10-11H2,1-3H3/t16-,19+,20-/m0/s1	FKTBPUPWFHCNQN-DBVUQKKJSA-N	Organic compounds	Organic oxygen compounds	Organooxygen compounds	Carbonyl compounds
17	MSID000017	(+)-Applanatumol G	CID_139586388	C20H26O8	CCO[C@@H]1CC[C@]2([C@@]1(COC2=O)C(OC)OC)CC(=O)c1cc(O)ccc1O	InChI=1S/C20H26O8/c1-4-27-16-7-8-19(10-15(23)13-9-12(21)5-6-14(13)22)17(24)28-11-20(16,19)18(25-2)26-3/h5-6,9,16,18,21-22H,4,7-8,10-11H2,1-3H3/t16-,19+,20-/m1/s1	FKTBPUPWFHCNQN-LSTHTHJFSA-N	Organic compounds	Organic oxygen compounds	Organooxygen compounds	Carbonyl compounds
18	MSID000018	(-)-Applanatumol I	CID_132542818	C16H16O8	Oc1ccc(c(c1)C(=O)C[C@]12CC[C@@H]([C@@]2(COC1=O)C(=O)O)O)O	InChI=1S/C16H16O8/c17-8-1-2-10(18)9(5-8)11(19)6-15-4-3-12(20)16(15,13(21)22)7-24-14(15)23/h1-2,5,12,17-18,20H,3-4,6-7H2,(H,21,22)/t12-,15+,16-/m0/s1	QNPQAWMNRANZDV-MAZHCROVSA-N	Organic compounds	Organic oxygen compounds	Organooxygen compounds	Carbonyl compounds
19	MSID000019	(+)-Applanatumol I	CID_139583735	C16H16O8	Oc1ccc(c(c1)C(=O)C[C@@]12CC[C@H]([C@]2(COC1=O)C(=O)O)O)O	InChI=1S/C16H16O8/c17-8-1-2-10(18)9(5-8)11(19)6-15-4-3-12(20)16(15,13(21)22)7-24-14(15)23/h1-2,5,12,17-18,20H,3-4,6-7H2,(H,21,22)/t12-,15+,16-/m1/s1	QNPQAWMNRANZDV-UHOFOFEASA-N	Organic compounds	Organic oxygen compounds	Organooxygen compounds	Carbonyl compounds
20	MSID000020	(-)-Applanatumol L	CID_139583202	C17H20O7	COC(=O)[C@]1(CC[C@H](C(=C)[C@H]1O)O)CC(=O)c1cc(O)ccc1O	InChI=1S/C17H20O7/c1-9-12(19)5-6-17(15(9)22,16(23)24-2)8-14(21)11-7-10(18)3-4-13(11)20/h3-4,7,12,15,18-20,22H,1,5-6,8H2,2H3/t12-,15-,17-/m1/s1	KZQCCTIIHZYRNR-SRCQZFHVSA-N	Organic compounds	Organic oxygen compounds	Organooxygen compounds	Carbonyl compounds
21	MSID000021	(+)-Applanatumol L	CID_132542822	C17H20O7	COC(=O)[C@@]1(CC[C@@H](C(=C)[C@@H]1O)O)CC(=O)c1cc(O)ccc1O	InChI=1S/C17H20O7/c1-9-12(19)5-6-17(15(9)22,16(23)24-2)8-14(21)11-7-10(18)3-4-13(11)20/h3-4,7,12,15,18-20,22H,1,5-6,8H2,2H3/t12-,15-,17-/m0/s1	KZQCCTIIHZYRNR-NUTKFTJISA-N	Organic compounds	Organic oxygen compounds	Organooxygen compounds	Carbonyl compounds
22	MSID000022	(-)-Applanatumol M	CID_139586912	C16H16O6	C=C1[C@H]2CC[C@@]([C@@H]1O)(C(=O)O2)CC(=O)c1cc(O)ccc1O	InChI=1S/C16H16O6/c1-8-13-4-5-16(14(8)20,15(21)22-13)7-12(19)10-6-9(17)2-3-11(10)18/h2-3,6,13-14,17-18,20H,1,4-5,7H2/t13-,14-,16-/m1/s1	NKSKUMZWMJJCOG-IIAWOOMASA-N	Organic compounds	Organic oxygen compounds	Organooxygen compounds	Carbonyl compounds
23	MSID000023	(+)-Applanatumol M	CID_132542823	C16H16O6	C=C1[C@@H]2CC[C@]([C@H]1O)(C(=O)O2)CC(=O)c1cc(O)ccc1O	InChI=1S/C16H16O6/c1-8-13-4-5-16(14(8)20,15(21)22-13)7-12(19)10-6-9(17)2-3-11(10)18/h2-3,6,13-14,17-18,20H,1,4-5,7H2/t13-,14-,16-/m0/s1	NKSKUMZWMJJCOG-DZKIICNBSA-N	Organic compounds	Organic oxygen compounds	Organooxygen compounds	Carbonyl compounds
24	MSID000024	(-)-Applanatumol N	CID_132542824	C16H18O7	OCC1=CCC[C@@]([C@H]1O)(CC(=O)c1cc(O)ccc1O)C(=O)O	InChI=1S/C16H18O7/c17-8-9-2-1-5-16(14(9)21,15(22)23)7-13(20)11-6-10(18)3-4-12(11)19/h2-4,6,14,17-19,21H,1,5,7-8H2,(H,22,23)/t14-,16-/m0/s1	GUVHIYQXEZUQDO-HOCLYGCPSA-N	Organic compounds	Organic oxygen compounds	Organooxygen compounds	Carbonyl compounds
25	MSID000025	(+)-Applanatumol N	CID_139583299	C16H18O7	OCC1=CCC[C@]([C@@H]1O)(CC(=O)c1cc(O)ccc1O)C(=O)O	InChI=1S/C16H18O7/c17-8-9-2-1-5-16(14(9)21,15(22)23)7-13(20)11-6-10(18)3-4-12(11)19/h2-4,6,14,17-19,21H,1,5,7-8H2,(H,22,23)/t14-,16-/m1/s1	GUVHIYQXEZUQDO-GDBMZVCRSA-N	Organic compounds	Organic oxygen compounds	Organooxygen compounds	Carbonyl compounds
26	MSID000026	(-)-Applanatumol O	CID_139586533	C16H16O6	O=CC1=CCC[C@](C1)(CC(=O)c1cc(O)ccc1O)C(=O)O	InChI=1S/C16H16O6/c17-9-10-2-1-5-16(7-10,15(21)22)8-14(20)12-6-11(18)3-4-13(12)19/h2-4,6,9,18-19H,1,5,7-8H2,(H,21,22)/t16-/m0/s1	BIAWVSQLGIZZHL-INIZCTEOSA-N	Organic compounds	Organic oxygen compounds	Organooxygen compounds	Carbonyl compounds
27	MSID000027	(+)-Applanatumol O	CID_139583743	C16H16O6	O=CC1=CCC[C@@](C1)(CC(=O)c1cc(O)ccc1O)C(=O)O	InChI=1S/C16H16O6/c17-9-10-2-1-5-16(7-10,15(21)22)8-14(20)12-6-11(18)3-4-13(12)19/h2-4,6,9,18-19H,1,5,7-8H2,(H,21,22)/t16-/m1/s1	BIAWVSQLGIZZHL-MRXNPFEDSA-N	Organic compounds	Organic oxygen compounds	Organooxygen compounds	Carbonyl compounds
28	MSID000028	(-)-Applanatumol P	CID_132542826	C17H20O7	OCC(=C)[C@H]1CC[C@@](O1)(CC(=O)c1cc(O)ccc1O)C(=O)OC	InChI=1S/C17H20O7/c1-10(9-18)15-5-6-17(24-15,16(22)23-2)8-14(21)12-7-11(19)3-4-13(12)20/h3-4,7,15,18-20H,1,5-6,8-9H2,2H3/t15-,17-/m1/s1	NNWFNIAYBDEVTF-NVXWUHKLSA-N	Organic compounds	Organic oxygen compounds	Organooxygen compounds	Carbonyl compounds
29	MSID000029	(+)-Applanatumol P	CID_139586496	C17H20O7	OCC(=C)[C@@H]1CC[C@](O1)(CC(=O)c1cc(O)ccc1O)C(=O)OC	InChI=1S/C17H20O7/c1-10(9-18)15-5-6-17(24-15,16(22)23-2)8-14(21)12-7-11(19)3-4-13(12)20/h3-4,7,15,18-20H,1,5-6,8-9H2,2H3/t15-,17-/m0/s1	NNWFNIAYBDEVTF-RDJZCZTQSA-N	Organic compounds	Organic oxygen compounds	Organooxygen compounds	Carbonyl compounds
30	MSID000030	(-)-Applanatumol Q	CID_132542827	C17H22O7	OCC([C@H]1CC[C@@](O1)(CC(=O)c1cc(O)ccc1O)C(=O)OC)C	InChI=1S/C17H22O7/c1-10(9-18)15-5-6-17(24-15,16(22)23-2)8-14(21)12-7-11(19)3-4-13(12)20/h3-4,7,10,15,18-20H,5-6,8-9H2,1-2H3/t10?,15-,17-/m1/s1	LSZVUGCMASOQBS-AVJGDSSSSA-N	Organic compounds	Organic oxygen compounds	Organooxygen compounds	Carbonyl compounds
31	MSID000031	(+)-Applanatumol Q	CID_139587556	C17H22O7	OCC([C@@H]1CC[C@](O1)(CC(=O)c1cc(O)ccc1O)C(=O)OC)C	InChI=1S/C17H22O7/c1-10(9-18)15-5-6-17(24-15,16(22)23-2)8-14(21)12-7-11(19)3-4-13(12)20/h3-4,7,10,15,18-20H,5-6,8-9H2,1-2H3/t10?,15-,17-/m0/s1	LSZVUGCMASOQBS-MEGFBMHJSA-N	Organic compounds	Organic oxygen compounds	Organooxygen compounds	Carbonyl compounds
32	MSID000032	(-)-Applanatumol R	CID_139586707	C16H20O7	OCC([C@@H]1CC[C@](O1)(CC(=O)c1cc(O)ccc1O)C(=O)O)C	InChI=1S/C16H20O7/c1-9(8-17)14-4-5-16(23-14,15(21)22)7-13(20)11-6-10(18)2-3-12(11)19/h2-3,6,9,14,17-19H,4-5,7-8H2,1H3,(H,21,22)/t9?,14-,16-/m0/s1	VOBDLFOMWLMXRY-NTFNSIDBSA-N	Organic compounds	Organic oxygen compounds	Organooxygen compounds	Carbonyl compounds
33	MSID000033	(+)-Applanatumol R	CID_132542828	C16H20O7	OCC([C@H]1CC[C@@](O1)(CC(=O)c1cc(O)ccc1O)C(=O)O)C	InChI=1S/C16H20O7/c1-9(8-17)14-4-5-16(23-14,15(21)22)7-13(20)11-6-10(18)2-3-12(11)19/h2-3,6,9,14,17-19H,4-5,7-8H2,1H3,(H,21,22)/t9?,14-,16-/m1/s1	VOBDLFOMWLMXRY-XPROPWDLSA-N	Organic compounds	Organic oxygen compounds	Organooxygen compounds	Carbonyl compounds
34	MSID000034	(-)-Applanatumol U	CID_139586493	C16H18O5	OCC(=CCCC1=C[C@H](OC1=O)c1cc(O)ccc1O)C	InChI=1S/C16H18O5/c1-10(9-17)3-2-4-11-7-15(21-16(11)20)13-8-12(18)5-6-14(13)19/h3,5-8,15,17-19H,2,4,9H2,1H3/t15-/m0/s1	FMWDHZPVFRVQMU-HNNXBMFYSA-N	Organic compounds	Lipids and lipid-like molecules	Fatty Acyls	Fatty alcohols
35	MSID000035	(+)-Applanatumol U	CID_139588025	C16H18O5	OCC(=CCCC1=C[C@@H](OC1=O)c1cc(O)ccc1O)C	InChI=1S/C16H18O5/c1-10(9-17)3-2-4-11-7-15(21-16(11)20)13-8-12(18)5-6-14(13)19/h3,5-8,15,17-19H,2,4,9H2,1H3/t15-/m1/s1	FMWDHZPVFRVQMU-OAHLLOKOSA-N	Organic compounds	Lipids and lipid-like molecules	Fatty Acyls	Fatty alcohols
36	MSID000036	(-)-Applanatumol V	CID_139586905	C16H16O6	O=CC(=C)[C@@H]1CC[C@@H]([C@H]1C(=O)c1cc(O)ccc1O)C(=O)O	InChI=1S/C16H16O6/c1-8(7-17)10-3-4-11(16(21)22)14(10)15(20)12-6-9(18)2-5-13(12)19/h2,5-7,10-11,14,18-19H,1,3-4H2,(H,21,22)/t10-,11-,14-/m0/s1	PLGMDEYIMRPUAI-MJVIPROJSA-N	Organic compounds	Organic oxygen compounds	Organooxygen compounds	Carbonyl compounds
37	MSID000037	(+)-Applanatumol V	CID_139584428	C16H16O6	O=CC(=C)[C@H]1CC[C@H]([C@@H]1C(=O)c1cc(O)ccc1O)C(=O)O	InChI=1S/C16H16O6/c1-8(7-17)10-3-4-11(16(21)22)14(10)15(20)12-6-9(18)2-5-13(12)19/h2,5-7,10-11,14,18-19H,1,3-4H2,(H,21,22)/t10-,11-,14-/m1/s1	PLGMDEYIMRPUAI-JTNHKYCSSA-N	Organic compounds	Organic oxygen compounds	Organooxygen compounds	Carbonyl compounds
38	MSID000038	(-)-Applanatumol W	CID_139587969	C17H18O6	COC(=O)[C@H]1CC[C@H]([C@@H]1C(=O)c1cc(O)ccc1O)C(=C)C=O	InChI=1S/C17H18O6/c1-9(8-18)11-4-5-12(17(22)23-2)15(11)16(21)13-7-10(19)3-6-14(13)20/h3,6-8,11-12,15,19-20H,1,4-5H2,2H3/t11-,12-,15-/m0/s1	VOSMLEIXNQUDNH-HUBLWGQQSA-N	Organic compounds	Organic oxygen compounds	Organooxygen compounds	Carbonyl compounds
39	MSID000039	(+)-Applanatumol W	CID_139587970	C17H18O6	COC(=O)[C@@H]1CC[C@@H]([C@H]1C(=O)c1cc(O)ccc1O)C(=C)C=O	InChI=1S/C17H18O6/c1-9(8-18)11-4-5-12(17(22)23-2)15(11)16(21)13-7-10(19)3-6-14(13)20/h3,6-8,11-12,15,19-20H,1,4-5H2,2H3/t11-,12-,15-/m1/s1	VOSMLEIXNQUDNH-LALPHHSUSA-N	Organic compounds	Organic oxygen compounds	Organooxygen compounds	Carbonyl compounds
40	MSID000040	(-)-Applanatumol X	CID_139585810	C13H12O5	Oc1ccc2c(c1)C(=O)[C@@H]1[C@H](O2)CC[C@H]1C(=O)O	InChI=1S/C13H12O5/c14-6-1-3-9-8(5-6)12(15)11-7(13(16)17)2-4-10(11)18-9/h1,3,5,7,10-11,14H,2,4H2,(H,16,17)/t7-,10-,11+/m1/s1	UBUDHORULOYWEA-ONOSFVFSSA-N	Organic compounds	Organoheterocyclic compounds	Benzopyrans	1-benzopyrans
41	MSID000041	(+)-Applanatumol X	CID_139583519	C13H12O5	Oc1ccc2c(c1)C(=O)[C@H]1[C@@H](O2)CC[C@@H]1C(=O)O	InChI=1S/C13H12O5/c14-6-1-3-9-8(5-6)12(15)11-7(13(16)17)2-4-10(11)18-9/h1,3,5,7,10-11,14H,2,4H2,(H,16,17)/t7-,10-,11+/m0/s1	UBUDHORULOYWEA-BKDNQFJXSA-N	Organic compounds	Organoheterocyclic compounds	Benzopyrans	1-benzopyrans
42	MSID000042	(-)-Applanatumol Y	CID_139583861	C14H14O5	COC(=O)[C@H]1CC[C@H]2[C@@H]1C(=O)c1c(O2)ccc(c1)O	InChI=1S/C14H14O5/c1-18-14(17)8-3-5-11-12(8)13(16)9-6-7(15)2-4-10(9)19-11/h2,4,6,8,11-12,15H,3,5H2,1H3/t8-,11-,12+/m0/s1	DNYQAKIYBSPDIF-KPXOXKRLSA-N	Organic compounds	Organoheterocyclic compounds	Benzopyrans	1-benzopyrans
43	MSID000043	(+)-Applanatumol Y	CID_139584406	C14H14O5	COC(=O)[C@@H]1CC[C@@H]2[C@H]1C(=O)c1c(O2)ccc(c1)O	InChI=1S/C14H14O5/c1-18-14(17)8-3-5-11-12(8)13(16)9-6-7(15)2-4-10(9)19-11/h2,4,6,8,11-12,15H,3,5H2,1H3/t8-,11-,12+/m1/s1	DNYQAKIYBSPDIF-FXAINCCUSA-N	Organic compounds	Organoheterocyclic compounds	Benzopyrans	1-benzopyrans
44	MSID000044	(-)-Applanatumol Z	CID_139584167	C14H16O6	COC(=O)[C@H]1CC[C@@H]([C@H]1C(=O)c1cc(O)ccc1O)O	InChI=1S/C14H16O6/c1-20-14(19)8-3-5-11(17)12(8)13(18)9-6-7(15)2-4-10(9)16/h2,4,6,8,11-12,15-17H,3,5H2,1H3/t8-,11-,12-/m0/s1	SXPHWVWHKNUWLH-UWJYBYFXSA-N	Organic compounds	Organic oxygen compounds	Organooxygen compounds	Carbonyl compounds
45	MSID000045	(+)-Applanatumol Z	CID_139584171	C14H16O6	COC(=O)[C@@H]1CC[C@H]([C@@H]1C(=O)c1cc(O)ccc1O)O	InChI=1S/C14H16O6/c1-20-14(19)8-3-5-11(17)12(8)13(18)9-6-7(15)2-4-10(9)16/h2,4,6,8,11-12,15-17H,3,5H2,1H3/t8-,11-,12-/m1/s1	SXPHWVWHKNUWLH-GGZOMVNGSA-N	Organic compounds	Organic oxygen compounds	Organooxygen compounds	Carbonyl compounds
46	MSID000046	(-)-Applanatumol Z2	CID_139588241	C14H12O5	COC(=O)[C@H]1CCc2c1oc1ccc(cc1c2=O)O	InChI=1S/C14H12O5/c1-18-14(17)9-4-3-8-12(16)10-6-7(15)2-5-11(10)19-13(8)9/h2,5-6,9,15H,3-4H2,1H3/t9-/m0/s1	BZWPDDPIFDNFIU-VIFPVBQESA-N	Organic compounds	Organoheterocyclic compounds	Benzopyrans	1-benzopyrans
47	MSID000047	(+)-Applanatumol Z2	CID_139588616	C14H12O5	COC(=O)[C@@H]1CCc2c1oc1ccc(cc1c2=O)O	InChI=1S/C14H12O5/c1-18-14(17)9-4-3-8-12(16)10-6-7(15)2-5-11(10)19-13(8)9/h2,5-6,9,15H,3-4H2,1H3/t9-/m1/s1	BZWPDDPIFDNFIU-SECBINFHSA-N	Organic compounds	Organoheterocyclic compounds	Benzopyrans	1-benzopyrans
48	MSID000048	(-)-Chizhine A	CID_139587927	C16H18O5	CC(=C[C@@H]1OC(=O)[C@H](C1)CC(=O)c1cc(O)ccc1O)C	InChI=1S/C16H18O5/c1-9(2)5-12-6-10(16(20)21-12)7-15(19)13-8-11(17)3-4-14(13)18/h3-5,8,10,12,17-18H,6-7H2,1-2H3/t10-,12+/m1/s1	QRWTVFKEWNICIM-PWSUYJOCSA-N	Organic compounds	Organic oxygen compounds	Organooxygen compounds	Carbonyl compounds
49	MSID000049	(-)-Chizhine B	CID_101905608	C16H18O5	CC(=C[C@H]1OC(=O)[C@H](C1)CC(=O)c1cc(O)ccc1O)C	InChI=1S/C16H18O5/c1-9(2)5-12-6-10(16(20)21-12)7-15(19)13-8-11(17)3-4-14(13)18/h3-5,8,10,12,17-18H,6-7H2,1-2H3/t10-,12-/m1/s1	QRWTVFKEWNICIM-ZYHUDNBSSA-N	Organic compounds	Organic oxygen compounds	Organooxygen compounds	Carbonyl compounds
50	MSID000050	(+)-Chizhine A	CID_101905607	C16H18O5	CC(=C[C@H]1OC(=O)[C@@H](C1)CC(=O)c1cc(O)ccc1O)C	InChI=1S/C16H18O5/c1-9(2)5-12-6-10(16(20)21-12)7-15(19)13-8-11(17)3-4-14(13)18/h3-5,8,10,12,17-18H,6-7H2,1-2H3/t10-,12+/m0/s1	QRWTVFKEWNICIM-CMPLNLGQSA-N	Organic compounds	Organic oxygen compounds	Organooxygen compounds	Carbonyl compounds
51	MSID000051	(+)-Chizhine B	CID_139583972	C16H18O5	CC(=C[C@@H]1OC(=O)[C@@H](C1)CC(=O)c1cc(O)ccc1O)C	InChI=1S/C16H18O5/c1-9(2)5-12-6-10(16(20)21-12)7-15(19)13-8-11(17)3-4-14(13)18/h3-5,8,10,12,17-18H,6-7H2,1-2H3/t10-,12-/m0/s1	QRWTVFKEWNICIM-JQWIXIFHSA-N	Organic compounds	Organic oxygen compounds	Organooxygen compounds	Carbonyl compounds
52	MSID000052	(-)-Chizhine C	CID_139585585	C16H18O6	CC(=C)[C@@H]1CC[C@](C(=O)O1)(O)CC(=O)c1cc(O)ccc1O	InChI=1S/C16H18O6/c1-9(2)14-5-6-16(21,15(20)22-14)8-13(19)11-7-10(17)3-4-12(11)18/h3-4,7,14,17-18,21H,1,5-6,8H2,2H3/t14-,16-/m0/s1	QXXQSVUNSUCVFA-HOCLYGCPSA-N	Organic compounds	Organic oxygen compounds	Organooxygen compounds	Carbonyl compounds
53	MSID000053	(+)-Chizhine C	CID_101905609	C16H18O6	CC(=C)[C@H]1CC[C@@](C(=O)O1)(O)CC(=O)c1cc(O)ccc1O	InChI=1S/C16H18O6/c1-9(2)14-5-6-16(21,15(20)22-14)8-13(19)11-7-10(17)3-4-12(11)18/h3-4,7,14,17-18,21H,1,5-6,8H2,2H3/t14-,16-/m1/s1	QXXQSVUNSUCVFA-GDBMZVCRSA-N	Organic compounds	Organic oxygen compounds	Organooxygen compounds	Carbonyl compounds
54	MSID000054	(-)-Chizhine D	CID_139584651	C16H20O5	CC(=CCC[C@H](C(=O)O)CC(=O)c1cc(O)ccc1O)C	InChI=1S/C16H20O5/c1-10(2)4-3-5-11(16(20)21)8-15(19)13-9-12(17)6-7-14(13)18/h4,6-7,9,11,17-18H,3,5,8H2,1-2H3,(H,20,21)/t11-/m0/s1	LDHARSAUIVWVIT-NSHDSACASA-N	Organic compounds	Organic oxygen compounds	Organooxygen compounds	Carbonyl compounds
55	MSID000055	(+)-Chizhine D	CID_101905610	C16H20O5	CC(=CCC[C@@H](C(=O)O)CC(=O)c1cc(O)ccc1O)C	InChI=1S/C16H20O5/c1-10(2)4-3-5-11(16(20)21)8-15(19)13-9-12(17)6-7-14(13)18/h4,6-7,9,11,17-18H,3,5,8H2,1-2H3,(H,20,21)/t11-/m1/s1	LDHARSAUIVWVIT-LLVKDONJSA-N	Organic compounds	Organic oxygen compounds	Organooxygen compounds	Carbonyl compounds
56	MSID000056	(-)-Chizhine E	CID_139588375	C16H16O5	C/C(=C\CCC1=C[C@H](OC1=O)c1cc(O)ccc1O)/C=O	InChI=1S/C16H16O5/c1-10(9-17)3-2-4-11-7-15(21-16(11)20)13-8-12(18)5-6-14(13)19/h3,5-9,15,18-19H,2,4H2,1H3/b10-3+/t15-/m0/s1	RMRKJRDHXPFMFC-GMLHSMKSSA-N	Organic compounds	Benzenoids	Phenols	Benzenediols
57	MSID000057	(-)-Chizhine F	CID_139584326	C21H24O5	CC(=CCCC1=C[C@H](OC1=O)c1cc(O)ccc1O)CC(=O)C=C(C)C	InChI=1S/C21H24O5/c1-13(2)9-17(23)10-14(3)5-4-6-15-11-20(26-21(15)25)18-12-16(22)7-8-19(18)24/h5,7-9,11-12,20,22,24H,4,6,10H2,1-3H3/t20-/m0/s1	JJEVWMMZVRKZMT-FQEVSTJZSA-N	Organic compounds	Lipids and lipid-like molecules	Prenol lipids	Terpene lactones
58	MSID000058	(-)-Cochlactone A	CID_138970029	C21H26O5	Oc1ccc(c(c1)C(=O)C[C@@]12CC[C@H]3[C@@](C1)(OC2=O)CCCC3(C)C)O	InChI=1S/C21H26O5/c1-19(2)7-3-8-21-12-20(18(25)26-21,9-6-17(19)21)11-16(24)14-10-13(22)4-5-15(14)23/h4-5,10,17,22-23H,3,6-9,11-12H2,1-2H3/t17-,20+,21-/m1/s1	FXMUSHRKJDUFQJ-JRGCBEDISA-N	Organic compounds	Organic oxygen compounds	Organooxygen compounds	Carbonyl compounds
59	MSID000059	(+)-Cochlactone A	CID_139591442	C21H26O5	Oc1ccc(c(c1)C(=O)C[C@]12CC[C@@H]3[C@](C1)(OC2=O)CCCC3(C)C)O	InChI=1S/C21H26O5/c1-19(2)7-3-8-21-12-20(18(25)26-21,9-6-17(19)21)11-16(24)14-10-13(22)4-5-15(14)23/h4-5,10,17,22-23H,3,6-9,11-12H2,1-2H3/t17-,20+,21-/m0/s1	FXMUSHRKJDUFQJ-WMQCIHAUSA-N	Organic compounds	Organic oxygen compounds	Organooxygen compounds	Carbonyl compounds
60	MSID000060	(-)-Ganoapplanatumine A	CID_139583117	C15H15NO3	Oc1ccc(c(c1)c1ncc(c2c1CC[C@@H]2O)C)O	InChI=1S/C15H15NO3/c1-8-7-16-15(10-3-5-13(19)14(8)10)11-6-9(17)2-4-12(11)18/h2,4,6-7,13,17-19H,3,5H2,1H3/t13-/m0/s1	YQOMGYYSWFJSPK-ZDUSSCGKSA-N	Organic compounds	Organoheterocyclic compounds	Pyridines and derivatives	Phenylpyridines
61	MSID000061	(+)-Ganoapplanatumine A	CID_139585018	C15H15NO3	Oc1ccc(c(c1)c1ncc(c2c1CC[C@H]2O)C)O	InChI=1S/C15H15NO3/c1-8-7-16-15(10-3-5-13(19)14(8)10)11-6-9(17)2-4-12(11)18/h2,4,6-7,13,17-19H,3,5H2,1H3/t13-/m1/s1	YQOMGYYSWFJSPK-CYBMUJFWSA-N	Organic compounds	Organoheterocyclic compounds	Pyridines and derivatives	Phenylpyridines
62	MSID000062	(-)-Ganotheaecolumol A	CID_139590275	C21H26O6	OC/C(=C/CC/C(=C/CC[C@@]1(CC(=O)c2c(O1)ccc(c2)O)C(=O)O)/C)/C	InChI=1S/C21H26O6/c1-14(5-3-6-15(2)13-22)7-4-10-21(20(25)26)12-18(24)17-11-16(23)8-9-19(17)27-21/h6-9,11,22-23H,3-5,10,12-13H2,1-2H3,(H,25,26)/b14-7+,15-6+/t21-/m1/s1	VLXRBLIWOFMVDW-YQERWRMHSA-N	Organic compounds	Organoheterocyclic compounds	Benzopyrans	1-benzopyrans
63	MSID000063	(-)-Ganotheaecolumol B	CID_139590277	C21H26O6	OC/C(=C\CC/C(=C/CC[C@@]1(CC(=O)c2c(O1)ccc(c2)O)C(=O)O)/C)/C	InChI=1S/C21H26O6/c1-14(5-3-6-15(2)13-22)7-4-10-21(20(25)26)12-18(24)17-11-16(23)8-9-19(17)27-21/h6-9,11,22-23H,3-5,10,12-13H2,1-2H3,(H,25,26)/b14-7+,15-6-/t21-/m1/s1	VLXRBLIWOFMVDW-NKYXGXTLSA-N	Organic compounds	Organoheterocyclic compounds	Benzopyrans	1-benzopyrans
64	MSID000064	(-)-Ganotheaecolumol E	CID_139590281	C21H24O6	Oc1ccc(c(c1)C1=C/C(=C/C=C/[C@]2(C)CC[C@H](O2)C(O)(C)C)/C(=O)O1)O	InChI=1S/C21H24O6/c1-20(2,25)18-8-10-21(3,27-18)9-4-5-13-11-17(26-19(13)24)15-12-14(22)6-7-16(15)23/h4-7,9,11-12,18,22-23,25H,8,10H2,1-3H3/b9-4+,13-5-/t18-,21+/m0/s1	ZCBZIKUEIKEDHK-DVVMZBMZSA-N	Organic compounds	Benzenoids	Phenols	Benzenediols
65	MSID000065	(+)-Ganotheaecolumol E	CID_139590280	C21H24O6	Oc1ccc(c(c1)C1=C/C(=C/C=C/[C@@]2(C)CC[C@@H](O2)C(O)(C)C)/C(=O)O1)O	InChI=1S/C21H24O6/c1-20(2,25)18-8-10-21(3,27-18)9-4-5-13-11-17(26-19(13)24)15-12-14(22)6-7-16(15)23/h4-7,9,11-12,18,22-23,25H,8,10H2,1-3H3/b9-4+,13-5-/t18-,21+/m1/s1	ZCBZIKUEIKEDHK-UPQUZKIMSA-N	Organic compounds	Benzenoids	Phenols	Benzenediols
66	MSID000066	(-)-Ganotheaecolumol F	CID_139590282	C21H26O5	C/C(=C\CCC1=C[C@H](OC1=O)c1cc(O)ccc1O)/CCC(=O)C(C)C	InChI=1S/C21H26O5/c1-13(2)18(23)9-7-14(3)5-4-6-15-11-20(26-21(15)25)17-12-16(22)8-10-19(17)24/h5,8,10-13,20,22,24H,4,6-7,9H2,1-3H3/b14-5+/t20-/m0/s1	CEINAMXDMPYDMG-IVVXPXLASA-N	Organic compounds	Benzenoids	Phenols	Benzenediols
67	MSID000067	(-)-Ganotheaecolumol G	CID_139590270	C22H26O7	CO[C@@]1(OC(=O)C(=C1)CC/C=C(/CC/C=C(/C(=O)O)\C)\C)c1cc(O)ccc1O	InChI=1S/C22H26O7/c1-14(6-4-8-15(2)20(25)26)7-5-9-16-13-22(28-3,29-21(16)27)18-12-17(23)10-11-19(18)24/h7-8,10-13,23-24H,4-6,9H2,1-3H3,(H,25,26)/b14-7+,15-8+/t22-/m0/s1	DQHIGCCLMVVSPZ-RPOLMSGVSA-N	Organic compounds	Lipids and lipid-like molecules	Prenol lipids	Terpene lactones
68	MSID000068	(+)-Ganotheaecolumol G	CID_139590269	C22H26O7	CO[C@]1(OC(=O)C(=C1)CC/C=C(/CC/C=C(/C(=O)O)\C)\C)c1cc(O)ccc1O	InChI=1S/C22H26O7/c1-14(6-4-8-15(2)20(25)26)7-5-9-16-13-22(28-3,29-21(16)27)18-12-17(23)10-11-19(18)24/h7-8,10-13,23-24H,4-6,9H2,1-3H3,(H,25,26)/b14-7+,15-8+/t22-/m1/s1	DQHIGCCLMVVSPZ-WXGMBTBMSA-N	Organic compounds	Lipids and lipid-like molecules	Prenol lipids	Terpene lactones
69	MSID000069	(-)-Ganotheaecolumol H	CID_139590272	C22H26O6	C/C(=C\CCC1=C[C@@](OC1=O)(OC)c1cc(O)ccc1O)/CC/C=C(/C=O)\C	InChI=1S/C22H26O6/c1-15(6-4-8-16(2)14-23)7-5-9-17-13-22(27-3,28-21(17)26)19-12-18(24)10-11-20(19)25/h7-8,10-14,24-25H,4-6,9H2,1-3H3/b15-7+,16-8+/t22-/m0/s1	MOFNDUJXTNIVEF-URUUZNIQSA-N	Organic compounds	Lipids and lipid-like molecules	Prenol lipids	Terpene lactones
70	MSID000070	(+)-Ganotheaecolumol H	CID_139590271	C22H26O6	C/C(=C\CCC1=C[C@](OC1=O)(OC)c1cc(O)ccc1O)/CC/C=C(/C=O)\C	InChI=1S/C22H26O6/c1-15(6-4-8-16(2)14-23)7-5-9-17-13-22(27-3,28-21(17)26)19-12-18(24)10-11-20(19)25/h7-8,10-14,24-25H,4-6,9H2,1-3H3/b15-7+,16-8+/t22-/m1/s1	MOFNDUJXTNIVEF-GPBMSMNOSA-N	Organic compounds	Lipids and lipid-like molecules	Prenol lipids	Terpene lactones
71	MSID000071	(-)-Lingzhiol	CID_72722558	C15H14O6	O[C@@H]1CC[C@]23[C@@]1(COC3=O)c1c(O)ccc(c1C(=O)C2)O	InChI=1S/C15H14O6/c16-7-1-2-8(17)12-11(7)9(18)5-14-4-3-10(19)15(12,14)6-21-13(14)20/h1-2,10,16-17,19H,3-6H2/t10-,14+,15-/m1/s1	LPZURWPKEZGETF-WKPIXPDZSA-N	Organic compounds	Organoheterocyclic compounds	Naphthofurans
72	MSID000072	(+)-Applanatumol C	CID_132542812	C15H14O6	O[C@@H]1CC[C@@]23[C@]1(COC3=O)c1c(O)ccc(c1C(=O)C2)O	InChI=1S/C15H14O6/c16-7-1-2-8(17)12-11(7)9(18)5-14-4-3-10(19)15(12,14)6-21-13(14)20/h1-2,10,16-17,19H,3-6H2/t10-,14-,15+/m1/s1	LPZURWPKEZGETF-KMUNFCNLSA-N	Organic compounds	Organoheterocyclic compounds	Naphthofurans
73	MSID000073	(+)-Lingzhiol	CID_72722559	C15H14O6	O[C@H]1CC[C@@]23[C@]1(COC3=O)c1c(O)ccc(c1C(=O)C2)O	InChI=1S/C15H14O6/c16-7-1-2-8(17)12-11(7)9(18)5-14-4-3-10(19)15(12,14)6-21-13(14)20/h1-2,10,16-17,19H,3-6H2/t10-,14+,15-/m0/s1	LPZURWPKEZGETF-VQISRLSMSA-N	Organic compounds	Organoheterocyclic compounds	Naphthofurans
74	MSID000074	(-)-Ternatin	CID_11707536	C37H67N7O8	CC[C@@H]([C@H]1NC(=O)[C@H](NC(=O)[C@@H](C)N(C)C(=O)[C@H](C)N(C(=O)[C@@H](NC(=O)[C@@H](N(C(=O)[C@@H](N(C1=O)C)C)C)CC(C)C)CC(C)C)C)[C@@H](C(C)C)O)C	InChI=1S/C37H67N7O8/c1-16-22(8)28-37(52)43(14)25(11)35(50)44(15)27(18-20(4)5)32(47)38-26(17-19(2)3)36(51)42(13)24(10)34(49)41(12)23(9)31(46)40-29(33(48)39-28)30(45)21(6)7/h19-30,45H,16-18H2,1-15H3,(H,38,47)(H,39,48)(H,40,46)/t22-,23+,24-,25-,26-,27-,28+,29+,30+/m0/s1	ZMFVAIFXJWEOMH-PTPSPKLBSA-N	Organic compounds	Organic acids and derivatives	Carboxylic acids and derivatives	Amino acids, peptides, and analogues
75	MSID000075	(+)-(1R,6S,7S)-tremul-2-ene-12(11)-lactone	CID_46872583	C15H22O3	C[C@H]1CCC2=C([C@@]3([C@H]1CC(C3)(C)C)O)COC2=O	InChI=1S/C15H22O3/c1-9-4-5-10-12(7-18-13(10)16)15(17)8-14(2,3)6-11(9)15/h9,11,17H,4-8H2,1-3H3/t9-,11-,15+/m0/s1	VNDGSRHWEWETAM-CCUNJIBTSA-N	Organic compounds	Lipids and lipid-like molecules	Prenol lipids	Diterpenoids
76	MSID000076	(+)-(2S,3R,6S,7S)-tremul-1(10)-ene-2,12-diol	CID_46872582	C15H26O2	OC[C@H]1CC[C@@H]([C@H]2C(=CC(C2)(C)C)[C@@]1(C)O)C	InChI=1S/C15H26O2/c1-10-5-6-11(9-16)15(4,17)13-8-14(2,3)7-12(10)13/h8,10-12,16-17H,5-7,9H2,1-4H3/t10-,11+,12-,15-/m0/s1	KQDBJTFTSGZHJB-OXIQGZBJSA-N	Organic compounds	Organic oxygen compounds	Organooxygen compounds	Alcohols and polyols
77	MSID000077	(+)-(3S,6R,7R,10S)-tremul-1-ene-6,10,12-triol	CID_46872468	C15H26O3	OC[C@H]1CC[C@@]([C@H]2C(=C1C)[C@@H](O)C(C2)(C)C)(C)O	InChI=1S/C15H26O3/c1-9-10(8-16)5-6-15(4,18)11-7-14(2,3)13(17)12(9)11/h10-11,13,16-18H,5-8H2,1-4H3/t10-,11-,13-,15-/m1/s1	KAHAKMSPIVIBRW-NLRBGTRBSA-N	Organic compounds	Organic oxygen compounds	Organooxygen compounds	Alcohols and polyols
78	MSID000078	(+)-(3S,6S,7S,10S)-tremul-1-ene-10,11,12-triol	CID_46872467	C15H26O3	OC[C@H]1CC[C@@H]([C@H]2C(=C1CO)[C@@H](O)C(C2)(C)C)C	InChI=1S/C15H26O3/c1-9-4-5-10(7-16)12(8-17)13-11(9)6-15(2,3)14(13)18/h9-11,14,16-18H,4-8H2,1-3H3/t9-,10+,11-,14+/m0/s1	VAKGCQGAOMIBKI-BBGACYKPSA-N	Organic compounds	Organic oxygen compounds	Organooxygen compounds	Alcohols and polyols
79	MSID000079	Morelsin B		C15H26O3	OC[C@@H]1CC[C@H]([C@@H]2C(=C1CO)[C@H](O)C(C2)(C)C)C	InChI=1S/C15H26O3/c1-9-4-5-10(7-16)12(8-17)13-11(9)6-15(2,3)14(13)18/h9-11,14,16-18H,4-8H2,1-3H3/t9-,10+,11-,14+/m1/s1	VAKGCQGAOMIBKI-DEKYYXRVSA-N	Organic compounds	Organic oxygen compounds	Organooxygen compounds	Alcohols and polyols
80	MSID000080	(+)-(R)-grifolinone C	CID_139583542	C44H60O5	C/C(=C\CC1=C(O)C(=C(C(=O)C1=O)C)c1c(C)cc(c(c1O)C/C=C(/CC/C=C(/CCC=C(C)C)\C)\C)O)/CC/C=C(/CCC=C(C)C)\C	InChI=1S/C44H60O5/c1-28(2)15-11-17-30(5)19-13-21-32(7)23-25-36-38(45)27-34(9)39(42(36)47)40-35(10)41(46)44(49)37(43(40)48)26-24-33(8)22-14-20-31(6)18-12-16-29(3)4/h15-16,19-20,23-24,27,45,47-48H,11-14,17-18,21-22,25-26H2,1-10H3/b30-19+,31-20+,32-23+,33-24+	XGBVAJXDAQBRLB-OAEQVLRSSA-N	Organic compounds	Lipids and lipid-like molecules	Prenol lipids	Diterpenoids
81	MSID000081	(+)-1,2-Didehydro-9-hydroxy-aristlone	CID_139590781	C15H20O2	O=C1C(=C2C=CC[C@@H]([C@]2([C@@H]2[C@H]1C2(C)C)C)C)O	InChI=1S/C15H20O2/c1-8-6-5-7-9-11(16)12(17)10-13(14(10,2)3)15(8,9)4/h5,7-8,10,13,16H,6H2,1-4H3/t8-,10-,13+,15+/m0/s1	VRXRXQBGHXYMBN-KAKFMGRLSA-N	Organic compounds	Lipids and lipid-like molecules	Prenol lipids	Sesquiterpenoids
82	MSID000082	(+)-23-Oxo-3,4-seco-lanosta-4(28),7(8),9(11),24(31)-tetraene-3,26-dicarboxylic acid	CID_11584123	C31H44O5	OC(=O)CC[C@@]1(C)[C@H](CC=C2C1=CC[C@]1([C@@]2(C)CC[C@@H]1[C@@H](CC(=O)C(=C)C(C(=O)O)C)C)C)C(=C)C	InChI=1S/C31H44O5/c1-18(2)22-9-10-25-24(29(22,6)14-13-27(33)34)12-16-30(7)23(11-15-31(25,30)8)19(3)17-26(32)20(4)21(5)28(35)36/h10,12,19,21-23H,1,4,9,11,13-17H2,2-3,5-8H3,(H,33,34)(H,35,36)/t19-,21?,22-,23-,29+,30-,31+/m1/s1	ZJMBUNAZIDNVOV-KUDMQRJLSA-N	Organic compounds	Lipids and lipid-like molecules	Prenol lipids	Triterpenoids
83	MSID000083	(+)-Epogymnolactam	CID_101883983	C8H13NO3	CCCCC1(O)NC(=O)[C@H]2[C@@H]1O2	InChI=1S/C8H13NO3/c1-2-3-4-8(11)6-5(12-6)7(10)9-8/h5-6,11H,2-4H2,1H3,(H,9,10)/t5-,6+,8?/m1/s1	ABIFCFYADLKZLB-RSHNMJPRSA-N	Organic compounds	Organoheterocyclic compounds	Oxazinanes	Morpholines
84	MSID000084	(+)-Lanosta-7,9(11),24-triene-3beta,21-diol	CID_139587539	C30H46O3	OC[C@@H]([C@H]1C(=O)C[C@@]2([C@]1(C)CC=C1C2=CC[C@@H]2[C@]1(C)CC[C@@H](C2(C)C)O)C)CCC=C(C)C	InChI=1S/C30H46O3/c1-19(2)9-8-10-20(18-31)26-23(32)17-30(7)22-11-12-24-27(3,4)25(33)14-15-28(24,5)21(22)13-16-29(26,30)6/h9,11,13,20,24-26,31,33H,8,10,12,14-18H2,1-7H3/t20-,24-,25-,26-,28+,29+,30-/m0/s1	BUIKYFGHLFKLDB-NYKPBSMSSA-N	Organic compounds	Lipids and lipid-like molecules	Prenol lipids	Triterpenoids
85	MSID000085	(+)-Torreyol	CID_11990360	C15H26O	CC1=C[C@H]2[C@@H](CC1)[C@@](C)(O)CC[C@@H]2C(C)C	InChI=1S/C15H26O/c1-10(2)12-7-8-15(4,16)14-6-5-11(3)9-13(12)14/h9-10,12-14,16H,5-8H2,1-4H3/t12-,13-,14-,15+/m1/s1	LHYHMMRYTDARSZ-TUVASFSCSA-N	Organic compounds	Lipids and lipid-like molecules	Prenol lipids	Sesquiterpenoids
86	MSID000086	α-Cadinol	CID_10398656	C15H26O	CC1=C[C@@H]2[C@@H](CC1)[C@](C)(O)CC[C@H]2C(C)C	InChI=1S/C15H26O/c1-10(2)12-7-8-15(4,16)14-6-5-11(3)9-13(12)14/h9-10,12-14,16H,5-8H2,1-4H3/t12-,13-,14+,15+/m0/s1	LHYHMMRYTDARSZ-BYNSBNAKSA-N	Organic compounds	Lipids and lipid-like molecules	Prenol lipids	Sesquiterpenoids
87	MSID000087	(−)-Trans-γ-monocyclofarnesol	CID_14707684	C15H26O	OC/C=C(/CC[C@H]1C(=C)CCCC1(C)C)\C	InChI=1S/C15H26O/c1-12(9-11-16)7-8-14-13(2)6-5-10-15(14,3)4/h9,14,16H,2,5-8,10-11H2,1,3-4H3/b12-9+/t14-/m0/s1	CXSCXELZZLVZJP-TZIYXEQSSA-N	Organic compounds	Lipids and lipid-like molecules	Prenol lipids	Sesquiterpenoids
88	MSID000088	(1R)-(3-acetophenyl)-1,2-ethanediol	CID_59296755	C10H12O3	OC[C@@H](c1cccc(c1)C(=O)C)O	InChI=1S/C10H12O3/c1-7(12)8-3-2-4-9(5-8)10(13)6-11/h2-5,10-11,13H,6H2,1H3/t10-/m0/s1	IYBBCIHVMPVXDA-JTQLQIEISA-N	Organic compounds	Organic oxygen compounds	Organooxygen compounds	Carbonyl compounds
89	MSID000089	(1R)-(3-ethenylphenyl)-1,2-ethanediol	CID_71665842	C10H12O2	OC[C@@H](c1cccc(c1)C=C)O	InChI=1S/C10H12O2/c1-2-8-4-3-5-9(6-8)10(12)7-11/h2-6,10-12H,1,7H2/t10-/m0/s1	BYCHQHDJBCVLGT-JTQLQIEISA-N	Organic compounds	Benzenoids	Benzene and substituted derivatives	Styrenes
90	MSID000090	(1S)-(3-ethenylphenyl)-1,2-ethanediol	CID_139588513	C10H12O2	OC[C@H](c1cccc(c1)C=C)O	InChI=1S/C10H12O2/c1-2-8-4-3-5-9(6-8)10(12)7-11/h2-6,10-12H,1,7H2/t10-/m1/s1	BYCHQHDJBCVLGT-SNVBAGLBSA-N	Organic compounds	Benzenoids	Benzene and substituted derivatives	Styrenes
91	MSID000091	(1R)-(3-formylphenyl)-1,2-ethanediol	CID_71665843	C9H10O3	OC[C@@H](c1cccc(c1)C=O)O	InChI=1S/C9H10O3/c10-5-7-2-1-3-8(4-7)9(12)6-11/h1-5,9,11-12H,6H2/t9-/m0/s1	CTMHFVBELISBOG-VIFPVBQESA-N	Organic compounds	Benzenoids	Benzene and substituted derivatives	Benzoyl derivatives
92	MSID000092	(1S)-(4-acetylphenyl)-1,2-ethanediol	CID_129411969	C10H12O3	OC[C@H](c1ccc(cc1)C(=O)C)O	InChI=1S/C10H12O3/c1-7(12)8-2-4-9(5-3-8)10(13)6-11/h2-5,10-11,13H,6H2,1H3/t10-/m1/s1	VFYMSAONOBWBNN-SNVBAGLBSA-N	Organic compounds	Organic oxygen compounds	Organooxygen compounds	Carbonyl compounds
93	MSID000093	(2')-(Z)-5-(3'-hydroxymethyl-3'-methylallyloxy)-7-methoxy-6-methylphthalide	CID_139585080	C15H18O5	OC/C(=C\COc1cc2COC(=O)c2c(c1C)OC)/C	InChI=1S/C15H18O5/c1-9(7-16)4-5-19-12-6-11-8-20-15(17)13(11)14(18-3)10(12)2/h4,6,16H,5,7-8H2,1-3H3/b9-4-	AKQXDTZFGGTDHR-WTKPLQERSA-N	Organic compounds	Organoheterocyclic compounds	Isocoumarans	Isobenzofuranones
94	MSID000094	(22E,24R)-ergosta-4,6,8(14),22-tetraen-3-one	CID_146157837,CID_6441416	C28H40O	CC([C@H](/C=C/[C@H]([C@H]1CCC2=C3[C@H](CC[C@]12C)[C@@]1(C)CCC(=O)C=C1C=C3)C)C)C	InChI=1S/C28H40O/c1-18(2)19(3)7-8-20(4)24-11-12-25-23-10-9-21-17-22(29)13-15-27(21,5)26(23)14-16-28(24,25)6/h7-10,17-20,24,26H,11-16H2,1-6H3/b8-7+/t19-,20+,24+,26-,27-,28+/m0/s1	OIMXTYUHMBQQJM-HSVWHVBGSA-N	Organic compounds	Lipids and lipid-like molecules	Steroids and steroid derivatives	Ergostane steroids
95	MSID000095	(22E)-cholesta-4,6,8(14),22-tetraen-3-on	CID_6442479	C27H38O	CC(C/C=C/[C@H]([C@H]1CCC2=C3[C@H](CC[C@]12C)[C@@]1(C)CCC(=O)C=C1C=C3)C)C	InChI=1S/C27H38O/c1-18(2)7-6-8-19(3)23-11-12-24-22-10-9-20-17-21(28)13-15-26(20,4)25(22)14-16-27(23,24)5/h6,8-10,17-19,23,25H,7,11-16H2,1-5H3/b8-6+/t19-,23-,25+,26+,27-/m1/s1	AJRNPFZYKICTEM-AQAVSRJYSA-N	Organic compounds	Lipids and lipid-like molecules	Steroids and steroid derivatives	Cholestane steroids
96	MSID000096	(24E)-3,4-hydroxycucurbita-5,24-diene-26-oic acid	CID_15479506	C30H48O3	C[C@@H]([C@H]1CC[C@@]2([C@]1(C)CC[C@@]1([C@H]2CC=C2[C@H]1CC[C@@H](C2(C)C)O)C)C)CC/C=C(/C(=O)O)\C	InChI=1S/C30H48O3/c1-19(9-8-10-20(2)26(32)33)21-15-16-30(7)24-13-11-22-23(12-14-25(31)27(22,3)4)28(24,5)17-18-29(21,30)6/h10-11,19,21,23-25,31H,8-9,12-18H2,1-7H3,(H,32,33)/b20-10+/t19-,21-,23-,24-,25+,28+,29-,30+/m1/s1	JMOPTHLWCJXLBX-MTPQQZNSSA-N	Organic compounds	Lipids and lipid-like molecules	Steroids and steroid derivatives	Cucurbitacins
97	MSID000097	(24E)-3,4-seco-cucurbita-4,24-diene-3-hydroxy-26,29-dioic acid	CID_139590780	C30H48O5	OCCC[C@@H]1/C(=C(\C(=O)O)/C)/CC[C@@H]2[C@@]1(C)CC[C@]1([C@@]2(C)CC[C@@H]1[C@@H](CC/C=C(/C(=O)O)\C)C)C	InChI=1S/C30H48O5/c1-19(9-7-10-20(2)26(32)33)23-14-15-30(6)25-13-12-22(21(3)27(34)35)24(11-8-18-31)28(25,4)16-17-29(23,30)5/h10,19,23-25,31H,7-9,11-18H2,1-6H3,(H,32,33)(H,34,35)/b20-10+,22-21-/t19-,23-,24-,25-,28+,29-,30+/m1/s1	ATZQJRLRJKPHQB-ZECBZNPZSA-N	Organic compounds	Lipids and lipid-like molecules	Prenol lipids	Triterpenoids
98	MSID000098	(24E)-3,4-seco-cucurbita-4,24-diene-3,26,29-trioic acid	CID_5316178	C30H46O6	OC(=O)CC[C@@H]1/C(=C(\C(=O)O)/C)/CC[C@@H]2[C@@]1(C)CC[C@]1([C@@]2(C)CC[C@@H]1[C@H](CC/C=C(/C(=O)O)\C)C)C	InChI=1S/C30H46O6/c1-18(8-7-9-19(2)26(33)34)22-14-15-30(6)24-12-10-21(20(3)27(35)36)23(11-13-25(31)32)28(24,4)16-17-29(22,30)5/h9,18,22-24H,7-8,10-17H2,1-6H3,(H,31,32)(H,33,34)(H,35,36)/b19-9+,21-20-/t18-,22+,23+,24+,28-,29+,30-/m0/s1	MLKGNOBMWJPGDM-OYWJSAOISA-N	Organic compounds	Lipids and lipid-like molecules	Prenol lipids	Triterpenoids
99	MSID000099	(24E)-3,4-secocucur-bita-4,24-diene-3,26-dioic acid	CID_101095217	C30H48O4	OC(=O)CC[C@@H]1C(=C(C)C)CC[C@@H]2[C@@]1(C)CC[C@]1([C@@]2(C)CC[C@@H]1[C@@H](CC/C=C(/C(=O)O)\C)C)C	InChI=1S/C30H48O4/c1-19(2)22-11-13-25-28(5,24(22)12-14-26(31)32)17-18-29(6)23(15-16-30(25,29)7)20(3)9-8-10-21(4)27(33)34/h10,20,23-25H,8-9,11-18H2,1-7H3,(H,31,32)(H,33,34)/b21-10+/t20-,23-,24-,25-,28+,29-,30+/m1/s1	YBIIHHTTWQAQQS-ADEQFILDSA-N	Organic compounds	Lipids and lipid-like molecules	Prenol lipids	Triterpenoids
100	MSID000100	(24E)-9a,11a-epoxy-3b-hydroxylanosta-7,24-dien-26-al	CID_139584065	C30H46O3	O=C/C(=C/CC[C@H]([C@H]1CC[C@@]2([C@]1(C)C[C@H]1O[C@]31C2=CCC1[C@]3(C)CC[C@@H](C1(C)C)O)C)C)/C	InChI=1S/C30H46O3/c1-19(18-31)9-8-10-20(2)21-13-15-27(5)23-12-11-22-26(3,4)24(32)14-16-28(22,6)30(23)25(33-30)17-29(21,27)7/h9,12,18,20-22,24-25,32H,8,10-11,13-17H2,1-7H3/b19-9+/t20-,21-,22?,24+,25-,27+,28+,29-,30+/m1/s1	YMOPKZYYURKDKI-SRIMDAHUSA-N	Organic compounds	Lipids and lipid-like molecules	Prenol lipids	Triterpenoids
101	MSID000101	Tsugaric acid C	CID_21603477	C32H50O5	CC(=O)O[C@@H]1CC[C@]2([C@H](C1(C)C)CCC1=C2CC[C@]2([C@@]1(C)CC[C@@H]2[C@H](C(=O)O)CC[C@H](C(=C)C)O)C)C	InChI=1S/C32H50O5/c1-19(2)25(34)11-9-21(28(35)36)22-13-17-32(8)24-10-12-26-29(4,5)27(37-20(3)33)15-16-30(26,6)23(24)14-18-31(22,32)7/h21-22,25-27,34H,1,9-18H2,2-8H3,(H,35,36)/t21-,22-,25-,26+,27-,30-,31-,32+/m1/s1	IPHISYDAYNYHSC-GAZLMKCGSA-N	Organic compounds	Lipids and lipid-like molecules	Prenol lipids	Triterpenoids
102	MSID000102	(25R)-antcin C	CID_101877728	C29H42O5	C[C@H](C(=C)CC[C@H]([C@H]1CC[C@@H]2[C@]1(C)CC(=O)C1=C2[C@@H](O)C[C@@H]2[C@]1(C)CCC(=O)C2C)C)C(=O)O	InChI=1S/C29H42O5/c1-15(17(3)27(33)34)7-8-16(2)19-9-10-20-25-23(31)13-21-18(4)22(30)11-12-28(21,5)26(25)24(32)14-29(19,20)6/h16-21,23,31H,1,7-14H2,2-6H3,(H,33,34)/t16-,17-,18?,19-,20+,21+,23+,28+,29-/m1/s1	TWISSXUWVGIUBP-GXCICQDZSA-N	Organic compounds	Lipids and lipid-like molecules	Steroids and steroid derivatives	Bile acids, alcohols and derivatives
103	MSID000103	(25S)-antcin C	CID_101877727	C29H42O5	C[C@@H](C(=C)CC[C@H]([C@H]1CC[C@@H]2[C@]1(C)CC(=O)C1=C2[C@@H](O)C[C@@H]2[C@]1(C)CCC(=O)C2C)C)C(=O)O	InChI=1S/C29H42O5/c1-15(17(3)27(33)34)7-8-16(2)19-9-10-20-25-23(31)13-21-18(4)22(30)11-12-28(21,5)26(25)24(32)14-29(19,20)6/h16-21,23,31H,1,7-14H2,2-6H3,(H,33,34)/t16-,17+,18?,19-,20+,21+,23+,28+,29-/m1/s1	TWISSXUWVGIUBP-VQARKGPKSA-N	Organic compounds	Lipids and lipid-like molecules	Steroids and steroid derivatives	Bile acids, alcohols and derivatives
104	MSID000104	Antcin C	CID_10050412	C29H42O5	CC(C(=C)CC[C@H]([C@H]1CC[C@@H]2[C@]1(C)CC(=O)C1=C2[C@@H](O)C[C@@H]2[C@]1(C)CCC(=O)[C@H]2C)C)C(=O)O	InChI=1S/C29H42O5/c1-15(17(3)27(33)34)7-8-16(2)19-9-10-20-25-23(31)13-21-18(4)22(30)11-12-28(21,5)26(25)24(32)14-29(19,20)6/h16-21,23,31H,1,7-14H2,2-6H3,(H,33,34)/t16-,17?,18+,19-,20+,21+,23+,28+,29-/m1/s1	TWISSXUWVGIUBP-FNSKOMQISA-N	Organic compounds	Lipids and lipid-like molecules	Steroids and steroid derivatives	Bile acids, alcohols and derivatives
105	MSID000105	Camphoratin G	CID_50900842	C29H42O5	CC(C(=C)CC[C@H]([C@H]1CC[C@@H]2[C@]1(C)CC(=O)C1=C2[C@H](O)C[C@@H]2[C@]1(C)CCC(=O)[C@H]2C)C)C(=O)O	InChI=1S/C29H42O5/c1-15(17(3)27(33)34)7-8-16(2)19-9-10-20-25-23(31)13-21-18(4)22(30)11-12-28(21,5)26(25)24(32)14-29(19,20)6/h16-21,23,31H,1,7-14H2,2-6H3,(H,33,34)/t16-,17?,18+,19-,20+,21+,23-,28+,29-/m1/s1	TWISSXUWVGIUBP-LQIJOPIVSA-N	Organic compounds	Lipids and lipid-like molecules	Steroids and steroid derivatives	Bile acids, alcohols and derivatives
106	MSID000106	(25R)-antcin K	CID_68150381	C29H44O6	C[C@H](C(=C)CC[C@H]([C@H]1CC[C@@H]2[C@]1(C)CC(=O)C1=C2[C@@H](O)C[C@@H]2[C@]1(C)CC[C@H]([C@]2(C)O)O)C)C(=O)O	InChI=1S/C29H44O6/c1-15(17(3)26(33)34)7-8-16(2)18-9-10-19-24-20(30)13-22-27(4,12-11-23(32)29(22,6)35)25(24)21(31)14-28(18,19)5/h16-20,22-23,30,32,35H,1,7-14H2,2-6H3,(H,33,34)/t16-,17-,18-,19+,20+,22-,23-,27+,28-,29-/m1/s1	RWTLLOHEXIZDCG-YEMCDZPPSA-N	Organic compounds	Lipids and lipid-like molecules	Steroids and steroid derivatives	Bile acids, alcohols and derivatives
107	MSID000107	(25S)-antcin K	CID_59051170	C29H44O6	C[C@@H](C(=C)CC[C@H]([C@H]1CC[C@@H]2[C@]1(C)CC(=O)C1=C2[C@@H](O)C[C@@H]2[C@]1(C)CC[C@H]([C@]2(C)O)O)C)C(=O)O	InChI=1S/C29H44O6/c1-15(17(3)26(33)34)7-8-16(2)18-9-10-19-24-20(30)13-22-27(4,12-11-23(32)29(22,6)35)25(24)21(31)14-28(18,19)5/h16-20,22-23,30,32,35H,1,7-14H2,2-6H3,(H,33,34)/t16-,17+,18-,19+,20+,22-,23-,27+,28-,29-/m1/s1	RWTLLOHEXIZDCG-OSBPFAAZSA-N	Organic compounds	Lipids and lipid-like molecules	Steroids and steroid derivatives	Bile acids, alcohols and derivatives
108	MSID000108	Antcin K	CID_53321283	C29H44O6	CC(C(=C)CC[C@H]([C@H]1CC[C@@H]2[C@]1(C)CC(=O)C1=C2[C@@H](O)C[C@@H]2[C@]1(C)CC[C@H]([C@]2(C)O)O)C)C(=O)O	InChI=1S/C29H44O6/c1-15(17(3)26(33)34)7-8-16(2)18-9-10-19-24-20(30)13-22-27(4,12-11-23(32)29(22,6)35)25(24)21(31)14-28(18,19)5/h16-20,22-23,30,32,35H,1,7-14H2,2-6H3,(H,33,34)/t16-,17?,18-,19+,20+,22-,23-,27+,28-,29-/m1/s1	RWTLLOHEXIZDCG-DOZCWRSDSA-N	Organic compounds	Lipids and lipid-like molecules	Steroids and steroid derivatives	Bile acids, alcohols and derivatives
109	MSID000109	(2S,3S,4R,2’R)-2-(2’-hydroxytetracosanoylamino)oct-adecane-1,3,4-triol	CID_10212035	C42H85NO5	CCCCCCCCCCCCCCCCCCCCCC[C@H](C(=O)N[C@H]([C@@H]([C@@H](CCCCCCCCCCCCCC)O)O)CO)O	InChI=1S/C42H85NO5/c1-3-5-7-9-11-13-15-17-18-19-20-21-22-23-24-26-28-30-32-34-36-40(46)42(48)43-38(37-44)41(47)39(45)35-33-31-29-27-25-16-14-12-10-8-6-4-2/h38-41,44-47H,3-37H2,1-2H3,(H,43,48)/t38-,39+,40+,41-/m0/s1	ZFUXWVVVWGWGPQ-QLLOZFISSA-N	Organic compounds	Lipids and lipid-like molecules	Sphingolipids	Ceramides
110	MSID000110	(2S)-1-[2-(furan-2-yl)-2-oxoethyl]-5-oxopyrrolidine-2-carboxylic acid	CID_139585423	C11H11NO5	OC(=O)[C@@H]1CCC(=O)N1CC(=O)c1ccco1	InChI=1S/C11H11NO5/c13-8(9-2-1-5-17-9)6-12-7(11(15)16)3-4-10(12)14/h1-2,5,7H,3-4,6H2,(H,15,16)/t7-/m0/s1	IOAYUDNRXFKAMK-ZETCQYMHSA-N	Organic compounds	Organic acids and derivatives	Carboxylic acids and derivatives	Amino acids, peptides, and analogues
111	MSID000111	(2SR, 3RS)-2-benzyltetrahydrofuran-3-ol	CID_139587651	C11H14O2	O[C@H]1CCO[C@@H]1Cc1ccccc1	InChI=1S/C11H14O2/c12-10-6-7-13-11(10)8-9-4-2-1-3-5-9/h1-5,10-12H,6-8H2/t10-,11+/m0/s1	YJXMOZYTZIZNQG-WDEREUQCSA-N	Organic compounds	Benzenoids	Benzene and substituted derivatives
112	MSID000112	(3aR,6S,7R,7aS)-6,7-dihydroxy-6-methyl-3-methylenehexahydrobenzofuran-2(3h)-one	CID_71655106	C10H14O4	O=C1O[C@H]2[C@@H](C1=C)CC[C@]([C@@H]2O)(C)O	InChI=1S/C10H14O4/c1-5-6-3-4-10(2,13)8(11)7(6)14-9(5)12/h6-8,11,13H,1,3-4H2,2H3/t6-,7+,8-,10+/m1/s1	ZVMVPIWZXUSVAO-JIOCBJNQSA-N	Organic compounds	Organoheterocyclic compounds	Benzofurans
113	MSID000113	(3R*,3aS*,4S*,8aR*)-3-(10-hydroxy-10-methylethyl)-5,8a-dimethyldecahydroazulen-4-ol	CID_102033115	C15H28O2	C[C@H]1CCC[C@]2([C@@H]([C@H]1O)[C@@H](CC2)C(O)(C)C)C	InChI=1S/C15H28O2/c1-10-6-5-8-15(4)9-7-11(14(2,3)17)12(15)13(10)16/h10-13,16-17H,5-9H2,1-4H3/t10-,11+,12+,13-,15+/m0/s1	SUNRMOIMPOGBOY-IHWVXMPCSA-N	Organic compounds	Lipids and lipid-like molecules	Prenol lipids	Sesquiterpenoids
114	MSID000114	(3R,4S,1′R)-3-(1′-hydroxyethyl)-4-methyldihydrofuran-2(3h)-one	CID_25154885	C7H12O3	C[C@H]([C@H]1[C@H](C)COC1=O)O	InChI=1S/C7H12O3/c1-4-3-10-7(9)6(4)5(2)8/h4-6,8H,3H2,1-2H3/t4-,5-,6-/m1/s1	POKADFGKQLIDGO-HSUXUTPPSA-N	Organic compounds	Organoheterocyclic compounds	Lactones	Gamma butyrolactones
115	MSID000115	(3R,4S,5S,17R,20R)-3,17,20-trihydroxy-4-methylpregn-8-en-7-one	CID_46872462	C22H34O4	O[C@@H]1CC[C@]2([C@H]([C@@H]1C)CC(=O)C1=C2CC[C@]2([C@H]1CC[C@]2(O)[C@H](O)C)C)C	InChI=1S/C22H34O4/c1-12-16-11-18(25)19-14(20(16,3)8-7-17(12)24)5-9-21(4)15(19)6-10-22(21,26)13(2)23/h12-13,15-17,23-24,26H,5-11H2,1-4H3/t12-,13+,15-,16-,17+,20+,21-,22-/m0/s1	MHAYDOHKEQXCEG-GLVQIBCTSA-N	Organic compounds	Lipids and lipid-like molecules	Steroids and steroid derivatives	Androstane steroids
116	MSID000116	(3R,4S)-3,7-dimethyl-1,6-octadiene-3,4-diol	CID_15895321	C10H18O2	C=C[C@]([C@H](CC=C(C)C)O)(O)C	InChI=1S/C10H18O2/c1-5-10(4,12)9(11)7-6-8(2)3/h5-6,9,11-12H,1,7H2,2-4H3/t9-,10+/m0/s1	YDGOIHYUXBNION-VHSXEESVSA-N	Organic compounds	Lipids and lipid-like molecules	Prenol lipids	Monoterpenoids
117	MSID000117	(3S,4R)-5-phenylpentane-1,3,4-triol	CID_118708003	C11H16O3	OCC[C@@H]([C@@H](Cc1ccccc1)O)O	InChI=1S/C11H16O3/c12-7-6-10(13)11(14)8-9-4-2-1-3-5-9/h1-5,10-14H,6-8H2/t10-,11+/m0/s1	NBMFDNRJHLWVHY-WDEREUQCSA-N	Organic compounds	Lipids and lipid-like molecules	Fatty Acyls	Fatty alcohols
118	MSID000118	(E)-6-((2-amino-4,5-dimethylphenyl)imino)dihydropyrimidine-2,4,5(3h)-trione	CID_139591352	C12H12N4O3	O=C1NC(=O)C(=O)/C(=N/c2cc(C)c(cc2N)C)/N1	InChI=1S/C12H12N4O3/c1-5-3-7(13)8(4-6(5)2)14-10-9(17)11(18)16-12(19)15-10/h3-4H,13H2,1-2H3,(H2,14,15,16,18,19)	YTTLBEKULJETJA-UHFFFAOYSA-N	Organic compounds	Benzenoids	Benzene and substituted derivatives	Xylenes
119	MSID000119	(E)-beta-caryophyllene	CID_5281515	C15H24	C/C/1=C\CCC(=C)[C@@H]2[C@@H](CC1)C(C2)(C)C	InChI=1S/C15H24/c1-11-6-5-7-12(2)13-10-15(3,4)14(13)9-8-11/h6,13-14H,2,5,7-10H2,1,3-4H3/b11-6+/t13-,14-/m1/s1	NPNUFJAVOOONJE-GFUGXAQUSA-N	Organic compounds	Lipids and lipid-like molecules	Prenol lipids	Sesquiterpenoids
120	MSID000120	Anticin A	CID_10004121,CID_44424392	C29H42O4	C[C@@H](C(=C)CC[C@H]([C@H]1CC[C@@H]2[C@]1(C)CC(=O)C1=C2CC[C@@H]2[C@]1(C)CCC(=O)[C@H]2C)C)C(=O)O	InChI=1S/C29H42O4/c1-16(18(3)27(32)33)7-8-17(2)21-11-12-23-20-9-10-22-19(4)24(30)13-14-28(22,5)26(20)25(31)15-29(21,23)6/h17-19,21-23H,1,7-15H2,2-6H3,(H,32,33)/t17-,18+,19+,21-,22+,23+,28+,29-/m1/s1	WTSUWKBKPMVEBO-QNMMDLTMSA-N	Organic compounds	Lipids and lipid-like molecules	Steroids and steroid derivatives	Ergostane steroids
121	MSID000121	(R)-2-(2-(furan-2-yl)-oxoethyl)-octahydropyrrolo[1,2-a]pyrazine-1,4-dione	CID_139586174	C13H14N2O4	O=C1N(CC(=O)N2[C@@H]1CCC2)CC(=O)c1ccco1	InChI=1S/C13H14N2O4/c16-10(11-4-2-6-19-11)7-14-8-12(17)15-5-1-3-9(15)13(14)18/h2,4,6,9H,1,3,5,7-8H2/t9-/m1/s1	PIVMKGZOXZAFPM-SECBINFHSA-N	Organic compounds	Organic acids and derivatives	Carboxylic acids and derivatives	Amino acids, peptides, and analogues
122	MSID000122	(S)-malic acid-1-o-beta-d-glucopyranoside	CID_135134727	C10H16O10	OCC1OC(O[C@H](C(=O)O)CC(=O)O)C(C(C1O)O)O	InChI=1S/C10H16O10/c11-2-4-6(14)7(15)8(16)10(20-4)19-3(9(17)18)1-5(12)13/h3-4,6-8,10-11,14-16H,1-2H2,(H,12,13)(H,17,18)/t3-,4?,6?,7?,8?,10?/m0/s1	OCIAPZWBJQRATB-AMRFRDDCSA-N	Organic compounds	Lipids and lipid-like molecules	Fatty Acyls	Fatty acyl glycosides
123	MSID000123	1 -Methyl-4-( 1 -methylethenyl) -cyclohexene(limonene)	CID_440917	C10H16	CC1=CC[C@@H](CC1)C(=C)C	InChI=1S/C10H16/c1-8(2)10-6-4-9(3)5-7-10/h4,10H,1,5-7H2,2-3H3/t10-/m0/s1	XMGQYMWWDOXHJM-JTQLQIEISA-N	Organic compounds	Lipids and lipid-like molecules	Prenol lipids	Monoterpenoids
124	MSID000124	1-(3-Ethylphenyl)-1,2-ethanediol	CID_129686768	C10H14O2	OCC(c1cccc(c1)CC)O	InChI=1S/C10H14O2/c1-2-8-4-3-5-9(6-8)10(12)7-11/h3-6,10-12H,2,7H2,1H3	ZPNNJYNIHQZIJX-UHFFFAOYSA-N	Organic compounds	Benzenoids	Benzene and substituted derivatives
125	MSID000125	1-(3-Formylphenyl)-ethanone	CID_643436	C9H8O2	O=Cc1cccc(c1)C(=O)C	InChI=1S/C9H8O2/c1-7(11)9-4-2-3-8(5-9)6-10/h2-6H,1H3	QVNFUJVNBRCKNJ-UHFFFAOYSA-N	Organic compounds	Organic oxygen compounds	Organooxygen compounds	Carbonyl compounds
126	MSID000126	1-(4-Ethylphenyl)-1,2-ethanediol	CID_84222001	C10H14O2	OCC(c1ccc(cc1)CC)O	InChI=1S/C10H14O2/c1-2-8-3-5-9(6-4-8)10(12)7-11/h3-6,10-12H,2,7H2,1H3	RYGSTNQAZVYULU-UHFFFAOYSA-N	Organic compounds	Benzenoids	Benzene and substituted derivatives
127	MSID000127	1-[2-(Furan-2-yl)-2-oxoethyl]piperidin-2-one	CID_62023366	C11H13NO3	O=C1CCCCN1CC(=O)c1ccco1	InChI=1S/C11H13NO3/c13-9(10-4-3-7-15-10)8-12-6-2-1-5-11(12)14/h3-4,7H,1-2,5-6,8H2	IWYJHWSXBCBFEF-UHFFFAOYSA-N	Organic compounds	Organic oxygen compounds	Organooxygen compounds	Carbonyl compounds
128	MSID000128	1-[2-(Furan-2-yl)-2-oxoethyl]pyrrolidin-2-one	CID_62018463	C10H11NO3	O=C1CCCN1CC(=O)c1ccco1	InChI=1S/C10H11NO3/c12-8(9-3-2-6-14-9)7-11-5-1-4-10(11)13/h2-3,6H,1,4-5,7H2	UICNWMCGFJXCHN-UHFFFAOYSA-N	Organic compounds	Organic oxygen compounds	Organooxygen compounds	Carbonyl compounds
129	MSID000129	1-[4-(Hydroxymethyl)phenyl]hexan-1-ol	CID_139587105	C13H20O2	CCCCCC(c1ccc(cc1)CO)O	InChI=1S/C13H20O2/c1-2-3-4-5-13(15)12-8-6-11(10-14)7-9-12/h6-9,13-15H,2-5,10H2,1H3	LMRVOUWMTBCVPJ-UHFFFAOYSA-N	Organic compounds	Lipids and lipid-like molecules	Fatty Acyls	Fatty alcohols
130	MSID000130	1-D-arabinitol monolinoleate	CID_57338625	C23H42O6	CCCCC/C=C\C/C=C\CCCCCCCC(=O)OC[C@H]([C@@H]([C@@H](CO)O)O)O	InChI=1S/C23H42O6/c1-2-3-4-5-6-7-8-9-10-11-12-13-14-15-16-17-22(27)29-19-21(26)23(28)20(25)18-24/h6-7,9-10,20-21,23-26,28H,2-5,8,11-19H2,1H3/b7-6-,10-9-/t20-,21-,23-/m1/s1	QEEPNWSVMUVIFO-ALSMKSPKSA-N	Organic compounds	Lipids and lipid-like molecules	Fatty Acyls	Lineolic acids and derivatives
131	MSID000131	1-Docosene	CID_74138	C22H44	CCCCCCCCCCCCCCCCCCCCC=C	InChI=1S/C22H44/c1-3-5-7-9-11-13-15-17-19-21-22-20-18-16-14-12-10-8-6-4-2/h3H,1,4-22H2,2H3	SPURMHFLEKVAAS-UHFFFAOYSA-N	Organic compounds	Hydrocarbons	Unsaturated hydrocarbons	Unsaturated aliphatic hydrocarbons
132	MSID000132	1-Formyl-4-methyl-7-isopropyl azulene (11,12-dihydro-lactaroviolin)	CID_11117364	C15H16O	O=Cc1ccc2c1cc(ccc2C)C(C)C	InChI=1S/C15H16O/c1-10(2)12-5-4-11(3)14-7-6-13(9-16)15(14)8-12/h4-10H,1-3H3	VAMFCHMEVQNLHP-UHFFFAOYSA-N	Organic compounds	Lipids and lipid-like molecules	Prenol lipids	Sesquiterpenoids
133	MSID000133	1-Hydroxy-3-pentanone	CID_11062321	C5H10O2	OCCC(=O)CC	InChI=1S/C5H10O2/c1-2-5(7)3-4-6/h6H,2-4H2,1H3	TYXULUBCBKMSSK-UHFFFAOYSA-N	Organic compounds	Organic oxygen compounds	Organooxygen compounds	Carbonyl compounds
134	MSID000134	1-Isopropyl-2,7-di-methylnaphthalene	CID_86239706	C15H18	Cc1ccc2c(c1)c(C(C)C)c(cc2)C	InChI=1S/C15H18/c1-10(2)15-12(4)6-8-13-7-5-11(3)9-14(13)15/h5-10H,1-4H3	AGPKAOWJJSQKOM-UHFFFAOYSA-N	Organic compounds	Benzenoids	Naphthalenes
135	MSID000135	1-Naphthalenecarboxaldehyde,3,4,4a,5,6,7,8,8a-octahydro-2-(hydroxymethyl)-5,5,8a-trimethyl	CID_139591649	C15H24O2	O=CC1=C(CO)CC[C@@H]2[C@]1(C)CCCC2(C)C	InChI=1S/C15H24O2/c1-14(2)7-4-8-15(3)12(10-17)11(9-16)5-6-13(14)15/h10,13,16H,4-9H2,1-3H3/t13-,15+/m0/s1	XQLANZDJEDVQJK-DZGCQCFKSA-N	Organic compounds	Organic oxygen compounds	Organooxygen compounds	Alcohols and polyols
136	MSID000136	1-Nonadecene	CID_29075	C19H38	CCCCCCCCCCCCCCCCCC=C	InChI=1S/C19H38/c1-3-5-7-9-11-13-15-17-19-18-16-14-12-10-8-6-4-2/h3H,1,4-19H2,2H3	NHLUYCJZUXOUBX-UHFFFAOYSA-N	Organic compounds	Hydrocarbons	Unsaturated hydrocarbons	Unsaturated aliphatic hydrocarbons
137	MSID000137	1,2-Diacetylsphingosine	CID_45101393	C22H43NO4	CCCCCCCCCCCCCCC[C@H]([C@@H](NC(=O)C)COC(=O)C)O	InChI=1S/C22H43NO4/c1-4-5-6-7-8-9-10-11-12-13-14-15-16-17-22(26)21(23-19(2)24)18-27-20(3)25/h21-22,26H,4-18H2,1-3H3,(H,23,24)/t21-,22+/m0/s1	IJUQYYAQRYPAMG-FCHUYYIVSA-N	Organic compounds	Organic acids and derivatives	Carboxylic acids and derivatives	Carboxylic acid derivatives
138	MSID000138	1,2,3,4,5,6-Hexathiepane	CID_87012	CH2S6	S1CSSSSS1	InChI=1S/CH2S6/c1-2-4-6-7-5-3-1/h1H2	JMYWPEQXUQGQNF-UHFFFAOYSA-N	Organic compounds	Organoheterocyclic compounds
139	MSID000139	1,2,6,10-Tetrahydroxy-3,9-epoxy-14-nor-5(15)-eudesmane	CID_139591379	C14H22O5	CC([C@@H]1C[C@H]2O[C@H]3C(=C)[C@@H]([C@@H]1O)[C@]2(O)[C@@H]([C@H]3O)O)C	InChI=1S/C14H22O5/c1-5(2)7-4-8-14(18)9(10(7)15)6(3)12(19-8)11(16)13(14)17/h5,7-13,15-18H,3-4H2,1-2H3/t7-,8+,9-,10+,11-,12-,13+,14-/m0/s1	GUOWYTGCMUSCDT-DOTWCUCFSA-N	Organic compounds	Organic oxygen compounds	Organooxygen compounds	Carbohydrates and carbohydrate conjugates
140	MSID000140	1,3,12-Nonadecatriene	CID_548894	C19H34	CCCCCCC=CCCCCCCCC=CC=C	InChI=1S/C19H34/c1-3-5-7-9-11-13-15-17-19-18-16-14-12-10-8-6-4-2/h3,5,7,14,16H,1,4,6,8-13,15,17-19H2,2H3	IIVXTTARMAJIDL-UHFFFAOYSA-N	Organic compounds	Hydrocarbons	Unsaturated hydrocarbons	Olefins
141	MSID000141	1,4-Dimethoxy-2,3-methylenedioxy-5-methylbenzene	CID_24776443	C10H12O4	COc1cc(C)c(c2c1OCO2)OC	InChI=1S/C10H12O4/c1-6-4-7(11-2)9-10(8(6)12-3)14-5-13-9/h4H,5H2,1-3H3	RJXJHEYXZURDJH-UHFFFAOYSA-N	Organic compounds	Organoheterocyclic compounds	Benzodioxoles
142	MSID000142	10-Hydroxydeca-trans-2,trans-8-dien-4,6-diinsaeuremethylester	CID_101412911	C11H10O3	OC/C=C/C#CC#C/C=C/C(=O)OC	InChI=1S/C11H10O3/c1-14-11(13)9-7-5-3-2-4-6-8-10-12/h6-9,12H,10H2,1H3/b8-6+,9-7+	KDEVFRDBFLWTKI-CDJQDVQCSA-N	Organic compounds	Lipids and lipid-like molecules	Fatty Acyls	Fatty alcohols
143	MSID000143	10E,14Z)-9-oxooctadeca-10,14-dien-12-ynoic acid	CID_5312835	C18H28O3	CCC/C=C\C#C/C=C/C(CCCCCCCC(=O)O)O	InChI=1S/C18H28O3/c1-2-3-4-5-6-8-11-14-17(19)15-12-9-7-10-13-16-18(20)21/h4-5,11,14,17,19H,2-3,7,9-10,12-13,15-16H2,1H3,(H,20,21)/b5-4-,14-11+	DFVZVNJGUDAZDP-UZWKOAOVSA-N	Organic compounds	Lipids and lipid-like molecules	Fatty Acyls	Fatty acids and conjugates
144	MSID000144	11-O-acetylcyathin A3	CID_101348969	C22H32O4	OCC1=CC(=O)[C@]2([C@H](C[C@H]1OC(=O)C)C1=C(CC[C@@]1(CC2)C)C(C)C)C	InChI=1S/C22H32O4/c1-13(2)16-6-7-21(4)8-9-22(5)17(20(16)21)11-18(26-14(3)24)15(12-23)10-19(22)25/h10,13,17-18,23H,6-9,11-12H2,1-5H3/t17-,18-,21-,22-/m1/s1	XWNYJTMVXNAWFA-MCEIDBOGSA-N	Organic compounds	Lipids and lipid-like molecules	Prenol lipids	Diterpenoids
145	MSID000145	11,12-Dihydroxy-15-drimeneoic acid	CID_71665840	C15H24O4	OC[C@H]1C(=CC[C@@H]2[C@]1(C)CCC[C@]2(C)C(=O)O)CO	InChI=1S/C15H24O4/c1-14-6-3-7-15(2,13(18)19)12(14)5-4-10(8-16)11(14)9-17/h4,11-12,16-17H,3,5-9H2,1-2H3,(H,18,19)/t11-,12+,14+,15-/m0/s1	JXXGSRMRZPQIQN-MXYBEHONSA-N	Organic compounds	Organic acids and derivatives	Carboxylic acids and derivatives	Carboxylic acids
146	MSID000146	12-Epi-ganoderlactone D	CID_139585814	C27H38O7	O=C1OCC(C1)(C)[C@H]1CC(=O)[C@@]2([C@]1(C)[C@@H](O)C(=O)C1=C2[C@@H](O)C[C@@H]2[C@]1(C)CC[C@@H](C2(C)C)O)C	InChI=1S/C27H38O7/c1-23(2)14-9-13(28)19-20(25(14,4)8-7-16(23)29)21(32)22(33)26(5)15(10-17(30)27(19,26)6)24(3)11-18(31)34-12-24/h13-16,22,28-29,33H,7-12H2,1-6H3/t13-,14-,15+,16-,22-,24?,25-,26-,27-/m0/s1	VFLFRNUNYMZADL-FAMHMAGJSA-N	Organic compounds	Lipids and lipid-like molecules	Prenol lipids	Triterpenoids
147	MSID000147	12-Hydroxydodecanoic acid methyl ester	CID_522424	C13H26O3	OCCCCCCCCCCCC(=O)OC	InChI=1S/C13H26O3/c1-16-13(15)11-9-7-5-3-2-4-6-8-10-12-14/h14H,2-12H2,1H3	WVYBBOXJKXXXOY-UHFFFAOYSA-N	Organic compounds	Lipids and lipid-like molecules	Fatty Acyls	Fatty alcohols
148	MSID000148	12,15-Dihydroxytremulene	CID_139587153	C15H26O2	OC[C@H]1CC[C@@H]([C@H]2C(=C1C)C[C@@](C2)(C)CO)C	InChI=1S/C15H26O2/c1-10-4-5-12(8-16)11(2)14-7-15(3,9-17)6-13(10)14/h10,12-13,16-17H,4-9H2,1-3H3/t10-,12+,13-,15-/m0/s1	MUCSQDHAVMOROR-QJZXMWHDSA-N	Organic compounds	Organic oxygen compounds	Organooxygen compounds	Alcohols and polyols
149	MSID000149	12b-Acetoxy-3b-hydroxy-7,11,15,23-tetraoxo-lanost-8,20e-diene-26-oic acid	CID_25000690	C32H42O9	CC(=O)O[C@@H]1C(=O)C2=C([C@]3([C@@]1(C)[C@H](CC3=O)/C(=C/C(=O)CC(C(=O)O)C)/C)C)C(=O)C[C@@H]1[C@]2(C)CC[C@@H](C1(C)C)O	InChI=1S/C32H42O9/c1-15(11-18(34)12-16(2)28(39)40)19-13-23(37)32(8)24-20(35)14-21-29(4,5)22(36)9-10-30(21,6)25(24)26(38)27(31(19,32)7)41-17(3)33/h11,16,19,21-22,27,36H,9-10,12-14H2,1-8H3,(H,39,40)/b15-11+/t16?,19-,21+,22+,27-,30+,31+,32+/m1/s1	NPQPGDYTXMOILM-BOAPTOANSA-N	Organic compounds	Lipids and lipid-like molecules	Prenol lipids	Triterpenoids
150	MSID000150	14-Deoxy-11,12-didehydroandrographolide	CID_5708351	C20H28O4	OC[C@]1(C)[C@H](O)CC[C@@]2([C@@H]1CCC(=C)[C@H]2/C=C/C1=CCOC1=O)C	InChI=1S/C20H28O4/c1-13-4-7-16-19(2,10-8-17(22)20(16,3)12-21)15(13)6-5-14-9-11-24-18(14)23/h5-6,9,15-17,21-22H,1,4,7-8,10-12H2,2-3H3/b6-5+/t15-,16+,17-,19+,20+/m1/s1	XMJAJFVLHDIEHF-CRBRZBHVSA-N	Organic compounds	Lipids and lipid-like molecules	Prenol lipids	Terpene lactones
151	MSID000151	14-Deoxyandrographolide	CID_11624161	C20H30O4	OC[C@]1(C)[C@H](O)CC[C@@]2([C@@H]1CCC(=C)[C@H]2CCC1=CCOC1=O)C	InChI=1S/C20H30O4/c1-13-4-7-16-19(2,10-8-17(22)20(16,3)12-21)15(13)6-5-14-9-11-24-18(14)23/h9,15-17,21-22H,1,4-8,10-12H2,2-3H3/t15-,16+,17-,19+,20+/m1/s1	GVRNTWSGBWPJGS-YSDSKTICSA-N	Organic compounds	Lipids and lipid-like molecules	Prenol lipids	Terpene lactones
152	MSID000152	15-Deoxyoxalicine B	CID_11060212	C30H33NO6	O=C1CC[C@]2(CO1)[C@H]1CC=C([C@@]3([C@]1(C)CC[C@@]2(O)C(=C)C)Oc1c(C3)c(=O)oc(c1)c1cccnc1)C	InChI=1S/C30H33NO6/c1-18(2)29(34)12-11-27(4)24(28(29)10-9-25(32)35-17-28)8-7-19(3)30(27)15-21-23(37-30)14-22(36-26(21)33)20-6-5-13-31-16-20/h5-7,13-14,16,24,34H,1,8-12,15,17H2,2-4H3/t24-,27+,28-,29+,30-/m0/s1	FIWRZQROYVDBSG-GBLYIOFISA-N	Organic compounds	Lipids and lipid-like molecules	Prenol lipids	Terpene lactones
153	MSID000153	15-O-acetylganolucidate A	CID_71665528	C32H46O7	O=C(CC(C(=O)O)C)C[C@H]([C@H]1C[C@@H]([C@@]2([C@]1(C)CC(=O)C1=C2CC[C@@H]2[C@]1(C)CCC(=O)C2(C)C)C)OC(=O)C)C	InChI=1S/C32H46O7/c1-17(13-20(34)14-18(2)28(37)38)22-15-26(39-19(3)33)32(8)21-9-10-24-29(4,5)25(36)11-12-30(24,6)27(21)23(35)16-31(22,32)7/h17-18,22,24,26H,9-16H2,1-8H3,(H,37,38)/t17-,18?,22-,24+,26+,30+,31-,32-/m1/s1	CKXRGSLEGLFLRZ-NWWXHUCFSA-N	Organic compounds	Lipids and lipid-like molecules	Prenol lipids	Triterpenoids
154	MSID000154	16-Deoxycucurbitacin B	CID_16099539	C32H46O7	CC(=O)OC(/C=C/C(=O)[C@@]([C@H]1CC[C@@]2([C@]1(C)CC(=O)[C@@]1([C@H]2CC=C2[C@H]1C[C@H](O)C(=O)C2(C)C)C)C)(O)C)(C)C	InChI=1S/C32H46O7/c1-18(33)39-27(2,3)14-13-24(35)32(9,38)23-12-15-29(6)22-11-10-19-20(16-21(34)26(37)28(19,4)5)31(22,8)25(36)17-30(23,29)7/h10,13-14,20-23,34,38H,11-12,15-17H2,1-9H3/b14-13+/t20-,21+,22+,23+,29+,30-,31+,32-/m1/s1	BXYMOPHDFDLMEA-LTFRKHHZSA-N	Organic compounds	Lipids and lipid-like molecules	Steroids and steroid derivatives	Cucurbitacins
155	MSID000155	16-Deoxyporicoic acid B	CID_16736458	C30H44O4	OC(=O)CC[C@@]1(C)[C@@H](CC=C2C1=CC[C@]1([C@@]2(C)CC[C@@H]1C(C(=O)O)CCC=C(C)C)C)C(=C)C	InChI=1S/C30H44O4/c1-19(2)9-8-10-21(27(33)34)23-13-17-30(7)25-12-11-22(20(3)4)28(5,16-15-26(31)32)24(25)14-18-29(23,30)6/h9,12,14,21-23H,3,8,10-11,13,15-18H2,1-2,4-7H3,(H,31,32)(H,33,34)/t21?,22-,23+,28-,29+,30-/m0/s1	ZYEKRDSCPDPVSG-MTGBOMLISA-N	Organic compounds	Lipids and lipid-like molecules	Prenol lipids	Triterpenoids
156	MSID000156	16α,25-Dihydroxyeburiconic acid	CID_46882674	C31H48O5	OC(=O)[C@@H]([C@H]1[C@H](O)C[C@@]2([C@]1(C)CCC1=C2CC[C@@H]2[C@]1(C)CCC(=O)C2(C)C)C)CCC(=C)C(O)(C)C	InChI=1S/C31H48O5/c1-18(28(4,5)36)9-10-19(26(34)35)25-22(32)17-31(8)21-11-12-23-27(2,3)24(33)14-15-29(23,6)20(21)13-16-30(25,31)7/h19,22-23,25,32,36H,1,9-17H2,2-8H3,(H,34,35)/t19-,22-,23+,25+,29-,30-,31+/m1/s1	YEXYFLGTSGQWMI-IMOFTLGFSA-N	Organic compounds	Lipids and lipid-like molecules	Prenol lipids	Triterpenoids
157	MSID000157	18-Deoxyleucopaxillone A	CID_16099538	C34H54O6	CC(=O)O[C@@H]([C@H]([C@H]1CC[C@@]2([C@]1(C)CC[C@@]1([C@H]2CC=C2[C@H]1CCC(=O)C2(C)C)C)C)C)C[C@H](C(O)(C)C)OC(=O)C	InChI=1S/C34H54O6/c1-20(26(39-21(2)35)19-29(31(6,7)38)40-22(3)36)23-15-16-34(10)27-13-11-24-25(12-14-28(37)30(24,4)5)32(27,8)17-18-33(23,34)9/h11,20,23,25-27,29,38H,12-19H2,1-10H3/t20-,23+,25+,26+,27+,29+,32-,33+,34-/m0/s1	FPMMXOUBTPOZNW-SPYCCOATSA-N	Organic compounds	Lipids and lipid-like molecules	Steroids and steroid derivatives	Cucurbitacins
158	MSID000158	19- O-oleoylsarcodonin A	CID_139588402	C38H60O4	CCCCCCCC/C=C\CCCCCCCC(=O)OC[C@H](C1=C2C3=CC=C(C[C@@H]([C@]3(C)CC[C@]2(CC1)C)O)C=O)C	InChI=1S/C38H60O4/c1-5-6-7-8-9-10-11-12-13-14-15-16-17-18-19-20-35(41)42-29-30(2)32-23-24-37(3)25-26-38(4)33(36(32)37)22-21-31(28-39)27-34(38)40/h12-13,21-22,28,30,34,40H,5-11,14-20,23-27,29H2,1-4H3/b13-12-/t30-,34+,37-,38-/m1/s1	MSIVJNMEKJEZGC-STVOZHENSA-N	Organic compounds	Lipids and lipid-like molecules	Prenol lipids	Diterpenoids
159	MSID000159	19-Hydroxylabda-8(17)-en-16,15-olide	CID_11544279	C20H32O3	OC[C@@]1(C)CCC[C@]2([C@H]1CCC(=C)[C@@H]2CCC1CCOC1=O)C	InChI=1S/C20H32O3/c1-14-5-8-17-19(2,13-21)10-4-11-20(17,3)16(14)7-6-15-9-12-23-18(15)22/h15-17,21H,1,4-13H2,2-3H3/t15?,16-,17-,19+,20+/m0/s1	UVPWMWNBXKSSAA-XXLBNXLCSA-N	Organic compounds	Lipids and lipid-like molecules	Prenol lipids	Terpene lactones
160	MSID000160	19-Hydroxylabda-8(17),13-dien-16,15-olid	CID_23238929	C20H30O3	OC[C@@]1(C)CCC[C@]2([C@H]1CCC(=C)[C@@H]2CCC1=CCOC1=O)C	InChI=1S/C20H30O3/c1-14-5-8-17-19(2,13-21)10-4-11-20(17,3)16(14)7-6-15-9-12-23-18(15)22/h9,16-17,21H,1,4-8,10-13H2,2-3H3/t16-,17-,19+,20+/m0/s1	WKKBRRFSRMDTJB-RAUXBKROSA-N	Organic compounds	Lipids and lipid-like molecules	Prenol lipids	Terpene lactones
161	MSID000161	Neoergosterol	CID_10571850	C27H40O	O[C@H]1CCc2c(C1)ccc1c2CC[C@]2([C@H]1CC[C@@H]2[C@@H](/C=C/[C@@H](C(C)C)C)C)C	InChI=1S/C27H40O/c1-17(2)18(3)6-7-19(4)25-12-13-26-24-10-8-20-16-21(28)9-11-22(20)23(24)14-15-27(25,26)5/h6-8,10,17-19,21,25-26,28H,9,11-16H2,1-5H3/b7-6+/t18-,19+,21-,25+,26-,27+/m0/s1	MNMJPUHGVUDRCV-DOOCTISASA-N	Organic compounds	Lipids and lipid-like molecules	Steroids and steroid derivatives	Cholestane steroids
162	MSID000162	19-O-linoleoylsarcodonin A	CID_139585047	C38H58O4	CCCCC/C=C\C/C=C\CCCCCCCC(=O)OC[C@H](C1=C2C3=CC=C(C[C@@H]([C@]3(C)CC[C@]2(CC1)C)O)C=O)C	InChI=1S/C38H58O4/c1-5-6-7-8-9-10-11-12-13-14-15-16-17-18-19-20-35(41)42-29-30(2)32-23-24-37(3)25-26-38(4)33(36(32)37)22-21-31(28-39)27-34(38)40/h9-10,12-13,21-22,28,30,34,40H,5-8,11,14-20,23-27,29H2,1-4H3/b10-9-,13-12-/t30-,34+,37-,38-/m1/s1	BZWGMCWZXRKRBF-JZSWCJGMSA-N	Organic compounds	Lipids and lipid-like molecules	Prenol lipids	Diterpenoids
163	MSID000163	19-O-stearoylsarcodonin A	CID_139588056	C38H62O4	CCCCCCCCCCCCCCCCCC(=O)OC[C@H](C1=C2C3=CC=C(C[C@@H]([C@]3(C)CC[C@]2(CC1)C)O)C=O)C	InChI=1S/C38H62O4/c1-5-6-7-8-9-10-11-12-13-14-15-16-17-18-19-20-35(41)42-29-30(2)32-23-24-37(3)25-26-38(4)33(36(32)37)22-21-31(28-39)27-34(38)40/h21-22,28,30,34,40H,5-20,23-27,29H2,1-4H3/t30-,34+,37-,38-/m1/s1	HXEOGVPSWPBMSI-NHVZWACOSA-N	Organic compounds	Lipids and lipid-like molecules	Prenol lipids	Diterpenoids
164	MSID000164	19,20-Epoxycytochalasin D	CID_129627390	C30H37NO7	CC(=O)O[C@@H]1C2OC2[C@@](C)(O)C(=O)[C@H](C/C=C/[C@@H]2[C@]31C(=O)N[C@H]([C@@H]3[C@H](C)C(=C)[C@H]2O)Cc1ccccc1)C	InChI=1S/C30H37NO7/c1-15-10-9-13-20-23(33)17(3)16(2)22-21(14-19-11-7-6-8-12-19)31-28(35)30(20,22)27(37-18(4)32)24-26(38-24)29(5,36)25(15)34/h6-9,11-13,15-16,20-24,26-27,33,36H,3,10,14H2,1-2,4-5H3,(H,31,35)/b13-9+/t15-,16+,20-,21-,22-,23+,24?,26?,27+,29-,30-/m0/s1	WHJRAYUHVRYTTH-SJPOVNCESA-N	Organic compounds	Organoheterocyclic compounds	Isoindoles and derivatives	Isoindolines
165	MSID000165	1beta-Hydroxylfriedelin	CID_50900146	C30H50O2	O=C1C[C@@H](O)[C@@H]2[C@]([C@H]1C)(C)CC[C@H]1[C@@]2(C)CC[C@@]2([C@]1(C)CC[C@@]1([C@H]2CC(C)(C)CC1)C)C	InChI=1S/C30H50O2/c1-19-20(31)17-21(32)24-27(19,5)10-9-22-28(24,6)14-16-30(8)23-18-25(2,3)11-12-26(23,4)13-15-29(22,30)7/h19,21-24,32H,9-18H2,1-8H3/t19-,21+,22-,23+,24+,26+,27+,28+,29+,30-/m0/s1	BFXGCIAJMLLIBE-NYCLATEYSA-N	Organic compounds	Lipids and lipid-like molecules	Prenol lipids	Triterpenoids
166	MSID000166	1H-indole-3-carboxylic acid	CID_69867	C9H7NO2	OC(=O)c1c[nH]c2c1cccc2	InChI=1S/C9H7NO2/c11-9(12)7-5-10-8-4-2-1-3-6(7)8/h1-5,10H,(H,11,12)	KMAKOBLIOCQGJP-UHFFFAOYSA-N	Organic compounds	Organoheterocyclic compounds	Indoles and derivatives	Indolecarboxylic acids and derivatives
167	MSID000167	1α,15-Dihydroxymarasmene	CID_131751903	C15H22O4	OC1CCC([C@H]2C31[C@H](O)O[C@@H]1C3C(=CC2)CO1)(C)C	InChI=1S/C15H22O4/c1-14(2)6-5-10(16)15-9(14)4-3-8-7-18-12(11(8)15)19-13(15)17/h3,9-13,16-17H,4-7H2,1-2H3/t9-,10?,11?,12+,13+,15?/m0/s1	HLFAYJASJWZZCH-TXRJVSRRSA-N	Organic compounds	Organoheterocyclic compounds	Furofurans
168	MSID000168	2-(2-Hydroxyethyl)phenol	CID_82200	C8H10O2	OCCc1ccccc1O	InChI=1S/C8H10O2/c9-6-5-7-3-1-2-4-8(7)10/h1-4,9-10H,5-6H2	ABFCOJLLBHXNOU-UHFFFAOYSA-N	Organic compounds	Benzenoids	Phenols	1-hydroxy-4-unsubstituted benzenoids
169	MSID000169	2-(3-Carboxy-2-hydroxypropyl)-3-methyl-2-cyclopentenone	CID_24778408	C10H14O4	OC(=O)CC(CC1=C(C)CCC1=O)O	InChI=1S/C10H14O4/c1-6-2-3-9(12)8(6)4-7(11)5-10(13)14/h7,11H,2-5H2,1H3,(H,13,14)	KHOGFVBKFSKLTN-UHFFFAOYSA-N	Organic compounds	Organic acids and derivatives	Hydroxy acids and derivatives	Beta hydroxy acids and derivatives
170	MSID000170	2-(4-Methyl-l-cyclohex-3-enyl)propan-2-ol(alpha-terpineol)	CID_17100	C10H18O	CC1=CCC(CC1)C(O)(C)C	InChI=1S/C10H18O/c1-8-4-6-9(7-5-8)10(2,3)11/h4,9,11H,5-7H2,1-3H3	WUOACPNHFRMFPN-UHFFFAOYSA-N	Organic compounds	Lipids and lipid-like molecules	Prenol lipids	Monoterpenoids
171	MSID000171	2-(Hydroxymethyl)-6-methyl-4h-pyran-4-one	CID_12006527	C7H8O3	Cc1cc(=O)cc(o1)CO	InChI=1S/C7H8O3/c1-5-2-6(9)3-7(4-8)10-5/h2-3,8H,4H2,1H3	MFJUYEZNIVTQBL-UHFFFAOYSA-N	Organic compounds	Organoheterocyclic compounds	Pyrans	Pyranones and derivatives
172	MSID000172	2-Azahypoxanthine	CID_135421876	C4H3N5O	O=c1[nH]nnc2c1[nH]cn2	InChI=1S/C4H3N5O/c10-4-2-3(6-1-5-2)7-9-8-4/h1H,(H2,5,6,7,8,10)	BTERLCQQBYXVIN-UHFFFAOYSA-N	Organic compounds	Organoheterocyclic compounds	Triazines	Aminotriazines
173	MSID000173	2-Chloro-1,3-dimethoxy-5-methylbenzene	CID_13939349	C9H11ClO2	COc1cc(C)cc(c1Cl)OC	InChI=1S/C9H11ClO2/c1-6-4-7(11-2)9(10)8(5-6)12-3/h4-5H,1-3H3	IOXKXMFPMHDABX-UHFFFAOYSA-N	Organic compounds	Benzenoids	Benzene and substituted derivatives	Methoxybenzenes
174	MSID000174	2-Dehydro-3-deoxylaetiporic acid A	CID_11304202	C27H30O3	OC(=O)/C=C/C/C=C/C=C/C=C\C=C\C=C/C=C/C=C/C=C\C=C\C=C(\C(=O)C)/C	InChI=1S/C27H30O3/c1-25(26(2)28)23-21-19-17-15-13-11-9-7-5-3-4-6-8-10-12-14-16-18-20-22-24-27(29)30/h3-19,21-24H,20H2,1-2H3,(H,29,30)/b5-3-,6-4+,9-7+,10-8-,13-11+,14-12+,17-15-,18-16+,21-19+,24-22+,25-23+	ZUWHINCAQDXMJU-CENJIFQDSA-N	Organic compounds	Lipids and lipid-like molecules	Fatty Acyls	Fatty acids and conjugates
175	MSID000175	2-Hydroxy-5-methoxy-6-(3-methylbut-3-en-1-ynyl)benzylalcohol	CID_10513000	C13H14O3	OCc1c(OC)ccc(c1C#CC(=C)C)O	InChI=1S/C13H14O3/c1-9(2)4-5-10-11(8-14)13(16-3)7-6-12(10)15/h6-7,14-15H,1,8H2,2-3H3	GNRILTNARVCLOD-UHFFFAOYSA-N	Organic compounds	Benzenoids	Phenols	Methoxyphenols
176	MSID000176	2, 5-Dihydroxylterephtalic acid	CID_69131	C8H6O6	OC(=O)c1cc(O)c(cc1O)C(=O)O	InChI=1S/C8H6O6/c9-5-1-3(7(11)12)6(10)2-4(5)8(13)14/h1-2,9-10H,(H,11,12)(H,13,14)	OYFRNYNHAZOYNF-UHFFFAOYSA-N	Organic compounds	Benzenoids	Benzene and substituted derivatives	Benzoic acids and derivatives
177	MSID000177	2,3,4-Trihydroxybenzoic acid	CID_11874	C7H6O5	OC(=O)c1ccc(c(c1O)O)O	InChI=1S/C7H6O5/c8-4-2-1-3(7(11)12)5(9)6(4)10/h1-2,8-10H,(H,11,12)	BRRSNXCXLSVPFC-UHFFFAOYSA-N	Organic compounds	Benzenoids	Benzene and substituted derivatives	Benzoic acids and derivatives
178	MSID000178	2,3,4,5-Tetrahydro-2,7-dihydroxy-5,8,10,10-tetramethyl-2,5-methano-1-benzoxepin	CID_10800580	C15H20O3	Oc1cc2c(cc1C)O[C@]1(C([C@]2(C)CC1)(C)C)O	InChI=1S/C15H20O3/c1-9-7-12-10(8-11(9)16)14(4)5-6-15(17,18-12)13(14,2)3/h7-8,16-17H,5-6H2,1-4H3/t14-,15-/m1/s1	KANVQRLDTGOSBL-HUUCEWRRSA-N	Organic compounds	Organoheterocyclic compounds	Benzopyrans	1-benzopyrans
179	MSID000179	2,3,4,5-Tetramethoxybenzoyl chloride	CID_44424387	C11H13ClO5	COc1c(OC)cc(c(c1OC)OC)C(=O)Cl	InChI=1S/C11H13ClO5/c1-14-7-5-6(11(12)13)8(15-2)10(17-4)9(7)16-3/h5H,1-4H3	IVMDBXGELGZZFZ-UHFFFAOYSA-N	Organic compounds	Benzenoids	Benzene and substituted derivatives	Benzoic acids and derivatives
180	MSID000180	2,4-Difluoro-1-isocyanato-benzene	CID_593258	C7H3F2NO	O=C=Nc1ccc(cc1F)F	InChI=1S/C7H3F2NO/c8-5-1-2-7(10-4-11)6(9)3-5/h1-3H	HNENEALJPWJWJY-UHFFFAOYSA-N	Organic compounds	Benzenoids	Benzene and substituted derivatives	Halobenzenes
181	MSID000181	2,4-Dimethoxy-6-methylbenzene-1,3-diol	CID_87294508	C9H12O4	COc1cc(C)c(c(c1O)OC)O	InChI=1S/C9H12O4/c1-5-4-6(12-2)8(11)9(13-3)7(5)10/h4,10-11H,1-3H3	STXRLTSAXAWSTB-UHFFFAOYSA-N	Organic compounds	Benzenoids	Phenols	Methoxyphenols
182	MSID000182	2,4,5-Trimethoxybenzaldehyde	CID_20525	C10H12O4	COc1cc(C=O)c(cc1OC)OC	InChI=1S/C10H12O4/c1-12-8-5-10(14-3)9(13-2)4-7(8)6-11/h4-6H,1-3H3	IAJBQAYHSQIQRE-UHFFFAOYSA-N	Organic compounds	Benzenoids	Benzene and substituted derivatives	Benzoyl derivatives
183	MSID000183	2,5-Cuparadiene-1,4-dione	CID_14191769	C15H20O2	O=C1C=C(C)C(=O)C=C1[C@@]1(C)CCCC1(C)C	InChI=1S/C15H20O2/c1-10-8-13(17)11(9-12(10)16)15(4)7-5-6-14(15,2)3/h8-9H,5-7H2,1-4H3/t15-/m1/s1	AOCQROFLQIRDKW-OAHLLOKOSA-N	Organic compounds	Lipids and lipid-like molecules	Prenol lipids	Sesquiterpenoids
184	MSID000184	2,5-Dihydroxy benzoic acid	CID_3469	C7H6O4	Oc1ccc(c(c1)C(=O)O)O	InChI=1S/C7H6O4/c8-4-1-2-6(9)5(3-4)7(10)11/h1-3,8-9H,(H,10,11)	WXTMDXOMEHJXQO-UHFFFAOYSA-N	Organic compounds	Benzenoids	Benzene and substituted derivatives	Benzoic acids and derivatives
185	MSID000185	2,5-Dihydroxy-3-isopropenyl-6-(3-methylbut-3-en-1-ynyl)benzaldehyde	CID_10801986	C17H18O3	O=Cc1c(C#CC(=C)C)c(O)cc(c1O)CC=C(C)C	InChI=1S/C17H18O3/c1-11(2)5-7-13-9-16(19)14(8-6-12(3)4)15(10-18)17(13)20/h5,9-10,19-20H,3,7H2,1-2,4H3	OHAIZLWDWYVYPJ-UHFFFAOYSA-N	Organic compounds	Lipids and lipid-like molecules	Prenol lipids	Quinone and hydroquinone lipids
186	MSID000186	2,5-Dihydroxyacetophenone	CID_10279	C8H8O3	Oc1ccc(c(c1)C(=O)C)O	InChI=1S/C8H8O3/c1-5(9)7-4-6(10)2-3-8(7)11/h2-4,10-11H,1H3	WLDWSGZHNBANIO-UHFFFAOYSA-N	Organic compounds	Organic oxygen compounds	Organooxygen compounds	Carbonyl compounds
187	MSID000187	2,9-Epoxydeliquinone	CID_15834664	C14H18O5	OCCC1=C(C)C(=O)C23C(C1=O)(CC(C3)(C)CO)O2	InChI=1S/C14H18O5/c1-8-9(3-4-15)11(18)14-6-12(2,7-16)5-13(14,19-14)10(8)17/h15-16H,3-7H2,1-2H3	DWSLSSYSNMZWGO-UHFFFAOYSA-N	Organic compounds	Organic oxygen compounds	Organooxygen compounds	Carbonyl compounds
188	MSID000188	20-Hydroxy lucidenic acid A	CID_101489029	C27H38O7	OC(=O)CC[C@@]([C@H]1CC(=O)[C@@]2([C@]1(C)CC(=O)C1=C2[C@@H](O)C[C@@H]2[C@]1(C)CCC(=O)C2(C)C)C)(O)C	InChI=1S/C27H38O7/c1-23(2)16-11-14(28)22-21(24(16,3)9-7-18(23)30)15(29)13-25(4)17(12-19(31)27(22,25)6)26(5,34)10-8-20(32)33/h14,16-17,28,34H,7-13H2,1-6H3,(H,32,33)/t14-,16-,17-,24-,25+,26-,27-/m0/s1	XZKWKMSUTLJOMB-YSROOBRHSA-N	Organic compounds	Lipids and lipid-like molecules	Prenol lipids	Triterpenoids
189	MSID000189	20-Hydroxy lucidenic acid D2	CID_139585728	C28H36O9	OC(=O)CCC([C@H]1CC(=O)[C@@]2([C@]1(OC(=O)C)CC(=O)C1=C2C(=O)C[C@@H]2[C@]1(C)CCC(=O)C2(C)C)C)(O)C	InChI=1S/C28H36O9/c1-14(29)37-28-13-16(31)22-23(15(30)11-17-24(2,3)19(32)7-9-25(17,22)4)27(28,6)20(33)12-18(28)26(5,36)10-8-21(34)35/h17-18,36H,7-13H2,1-6H3,(H,34,35)/t17-,18+,25-,26?,27-,28-/m0/s1	KKOBUWSLPYWAMP-WUKPOZGNSA-N	Organic compounds	Lipids and lipid-like molecules	Prenol lipids	Triterpenoids
190	MSID000190	20-Hydroxy lucidenic acid E2	CID_11443981	C29H40O9	CC(=O)O[C@@H]1C(=O)C2=C([C@]3([C@@]1(C)[C@H](CC3=O)C(CCC(=O)O)(O)C)C)C(=O)C[C@@H]1[C@]2(C)CC[C@@H](C1(C)C)O	InChI=1S/C29H40O9/c1-14(30)38-24-23(36)22-21(15(31)12-16-25(2,3)18(32)8-10-26(16,22)4)29(7)19(33)13-17(28(24,29)6)27(5,37)11-9-20(34)35/h16-18,24,32,37H,8-13H2,1-7H3,(H,34,35)/t16-,17+,18-,24+,26-,27?,28-,29-/m0/s1	JZZMIFMLEGZFJO-TYVNISONSA-N	Organic compounds	Lipids and lipid-like molecules	Prenol lipids	Triterpenoids
191	MSID000191	20-Hydroxy lucidenic acid F	CID_11454258	C27H36O7	OC(=O)CCC([C@H]1CC(=O)[C@@]2([C@]1(C)CC(=O)C1=C2C(=O)C[C@@H]2[C@]1(C)CCC(=O)C2(C)C)C)(O)C	InChI=1S/C27H36O7/c1-23(2)16-11-14(28)22-21(24(16,3)9-7-18(23)30)15(29)13-25(4)17(12-19(31)27(22,25)6)26(5,34)10-8-20(32)33/h16-17,34H,7-13H2,1-6H3,(H,32,33)/t16-,17-,24-,25+,26?,27-/m0/s1	RHUOPMPJXWNRKL-VFTKYELVSA-N	Organic compounds	Lipids and lipid-like molecules	Prenol lipids	Triterpenoids
192	MSID000192	20-Hydroxy lucidenic acid N	CID_11408923	C27H40O7	OC(=O)CCC([C@H]1CC(=O)[C@@]2([C@]1(C)CC(=O)C1=C2[C@@H](O)C[C@@H]2[C@]1(C)CC[C@@H](C2(C)C)O)C)(O)C	InChI=1S/C27H40O7/c1-23(2)16-11-14(28)22-21(24(16,3)9-7-18(23)30)15(29)13-25(4)17(12-19(31)27(22,25)6)26(5,34)10-8-20(32)33/h14,16-18,28,30,34H,7-13H2,1-6H3,(H,32,33)/t14-,16-,17-,18-,24-,25+,26?,27-/m0/s1	KHMZFMPQPFGSOS-MJJUKISYSA-N	Organic compounds	Lipids and lipid-like molecules	Prenol lipids	Triterpenoids
193	MSID000193	20-Hydroxy-3,12,15,23-tetraoxolanosta-7,9(11),16-trien-26-oic acid	CID_139591687	C30H38O7	O=C(CC(C1=CC(=O)[C@@]2([C@]1(C)C(=O)C=C1C2=CC[C@@H]2[C@]1(C)CCC(=O)C2(C)C)C)(O)C)CC(C(=O)O)C	InChI=1S/C30H38O7/c1-16(25(35)36)12-17(31)15-28(5,37)21-14-24(34)29(6)18-8-9-20-26(2,3)22(32)10-11-27(20,4)19(18)13-23(33)30(21,29)7/h8,13-14,16,20,37H,9-12,15H2,1-7H3,(H,35,36)/t16?,20-,27+,28?,29+,30-/m0/s1	JFCYOZDABVWLAB-OGJFIDDRSA-N	Organic compounds	Lipids and lipid-like molecules	Steroids and steroid derivatives	Bile acids, alcohols and derivatives
194	MSID000194	20-Hydroxylucidenic acid P	CID_11191849	C29H42O9	CC(=O)O[C@@H]1C(=O)C2=C([C@]3([C@@]1(C)[C@H](CC3=O)C(CCC(=O)O)(O)C)C)[C@@H](O)C[C@@H]1[C@]2(C)CC[C@@H](C1(C)C)O	InChI=1S/C29H42O9/c1-14(30)38-24-23(36)22-21(15(31)12-16-25(2,3)18(32)8-10-26(16,22)4)29(7)19(33)13-17(28(24,29)6)27(5,37)11-9-20(34)35/h15-18,24,31-32,37H,8-13H2,1-7H3,(H,34,35)/t15-,16-,17+,18-,24+,26-,27?,28-,29-/m0/s1	FFMHRFMHJKVBHE-OOLUJHIHSA-N	Organic compounds	Lipids and lipid-like molecules	Prenol lipids	Triterpenoids
195	MSID000195	21-Hydroxylanosta-7,9( 11) -24-trien-3-one	CID_15894356	C30H46O2	OC[C@@H]([C@H]1CC[C@@]2([C@]1(C)CC=C1C2=CC[C@@H]2[C@]1(C)CCC(=O)C2(C)C)C)CCC=C(C)C	InChI=1S/C30H46O2/c1-20(2)9-8-10-21(19-31)22-13-17-30(7)24-11-12-25-27(3,4)26(32)15-16-28(25,5)23(24)14-18-29(22,30)6/h9,11,14,21-22,25,31H,8,10,12-13,15-19H2,1-7H3/t21-,22+,25-,28+,29+,30-/m0/s1	FQQMLVSIEXRTOS-KTKIDDBTSA-N	Organic compounds	Lipids and lipid-like molecules	Prenol lipids	Triterpenoids
196	MSID000196	21-Hydroxylanosta-8,24-dien-3-one	CID_15292988	C30H48O2	OC[C@@H]([C@H]1CC[C@@]2([C@]1(C)CCC1=C2CC[C@@H]2[C@]1(C)CCC(=O)C2(C)C)C)CCC=C(C)C	InChI=1S/C30H48O2/c1-20(2)9-8-10-21(19-31)22-13-17-30(7)24-11-12-25-27(3,4)26(32)15-16-28(25,5)23(24)14-18-29(22,30)6/h9,21-22,25,31H,8,10-19H2,1-7H3/t21-,22+,25-,28+,29+,30-/m0/s1	OEQYASIYRZNOIT-KTKIDDBTSA-N	Organic compounds	Lipids and lipid-like molecules	Prenol lipids	Triterpenoids
197	MSID000197	22b-Acetoxy-3a,15a-trihydroxylanosta-7,9(11),24-trien-26-oic acid	CID_139585392	C32H48O6	CC(=O)O[C@H](C([C@H]1C[C@@H]([C@@]2([C@]1(C)CC=C1C2=CCC2[C@]1(C)CC[C@H](C2(C)C)O)C)O)C)C/C=C(/C(=O)O)\C	InChI=1S/C32H48O6/c1-18(28(36)37)9-11-24(38-20(3)33)19(2)23-17-27(35)32(8)22-10-12-25-29(4,5)26(34)14-15-30(25,6)21(22)13-16-31(23,32)7/h9-10,13,19,23-27,34-35H,11-12,14-17H2,1-8H3,(H,36,37)/b18-9+/t19?,23-,24+,25?,26-,27+,30-,31-,32-/m1/s1	PXBRGMAJKPPNOG-DRIPWNGSSA-N	Organic compounds	Lipids and lipid-like molecules	Prenol lipids	Triterpenoids
198	MSID000198	22b-Acetoxy-3b,15 a -dihydroxylanosta-7,9(11),24-trien-26-oic acid		C32H48O6	CC(=O)O[C@H](C(C1C[C@@H]([C@@]2([C@]1(C)CC=C1C2=CCC2[C@]1(C)CC[C@@H](C2(C)C)O)C)O)C)C/C=C(/C(=O)O)\C	InChI=1S/C32H48O6/c1-18(28(36)37)9-11-24(38-20(3)33)19(2)23-17-27(35)32(8)22-10-12-25-29(4,5)26(34)14-15-30(25,6)21(22)13-16-31(23,32)7/h9-10,13,19,23-27,34-35H,11-12,14-17H2,1-8H3,(H,36,37)/b18-9+/t19?,23?,24-,25?,26-,27-,30+,31+,32+/m0/s1	PXBRGMAJKPPNOG-MKIKOMHWSA-N	Organic compounds	Lipids and lipid-like molecules	Prenol lipids	Triterpenoids
199	MSID000199	23-Hydroxy ganoderic acid S	CID_46830518	C30H46O4	OC(/C=C(\C(=O)O)/C)C[C@H]([C@H]1CC[C@@]2([C@]1(C)CC=C1C2=CC[C@@H]2[C@]1(C)CCC(C2(C)C)O)C)C	InChI=1S/C30H46O4/c1-18(16-20(31)17-19(2)26(33)34)21-10-14-30(7)23-8-9-24-27(3,4)25(32)12-13-28(24,5)22(23)11-15-29(21,30)6/h8,11,17-18,20-21,24-25,31-32H,9-10,12-16H2,1-7H3,(H,33,34)/b19-17-/t18-,20?,21-,24+,25?,28-,29-,30+/m1/s1	BHPUPTSWPKUFML-SWYJLTNCSA-N	Organic compounds	Lipids and lipid-like molecules	Prenol lipids	Triterpenoids
200	MSID000200	23S-hydroxy-3,7,11,15-tetraoxo-lanost-8,24e-diene-26-oicacid	CID_25000689	C30H40O7	O[C@H](/C=C(/C(=O)O)\C)C[C@H]([C@H]1CC(=O)[C@@]2([C@]1(C)CC(=O)C1=C2C(=O)C[C@@H]2[C@]1(C)CCC(=O)C2(C)C)C)C	InChI=1S/C30H40O7/c1-15(10-17(31)11-16(2)26(36)37)18-12-23(35)30(7)25-19(32)13-21-27(3,4)22(34)8-9-28(21,5)24(25)20(33)14-29(18,30)6/h11,15,17-18,21,31H,8-10,12-14H2,1-7H3,(H,36,37)/b16-11+/t15-,17+,18-,21+,28+,29-,30+/m1/s1	PILMPTUAXYPAME-KKYGLDRZSA-N	Organic compounds	Lipids and lipid-like molecules	Prenol lipids	Triterpenoids
201	MSID000201	25-Hydroxyporicoic acid C	CID_44556811	C31H46O5	OC(=O)CC[C@@]1(C)[C@@H](CC=C2C1=CC[C@]1([C@@]2(C)CC[C@@H]1C(C(=O)O)CCC(=C)C(O)(C)C)C)C(=C)C	InChI=1S/C31H46O5/c1-19(2)22-11-12-25-24(29(22,6)16-15-26(32)33)14-18-30(7)23(13-17-31(25,30)8)21(27(34)35)10-9-20(3)28(4,5)36/h12,14,21-23,36H,1,3,9-11,13,15-18H2,2,4-8H3,(H,32,33)(H,34,35)/t21?,22-,23+,29-,30+,31-/m0/s1	HHZQHKPGFJOQSU-MOLUDBHFSA-N	Organic compounds	Lipids and lipid-like molecules	Prenol lipids	Triterpenoids
202	MSID000202	25-Hydroxyporicoic acid H	CID_16736865	C31H48O6	OC(=O)CC[C@@]1(C)[C@@H](CCC2=C1CC[C@]1([C@@]2(C)C[C@H]([C@@H]1C(C(=O)O)CCC(=C)C(O)(C)C)O)C)C(=C)C	InChI=1S/C31H48O6/c1-18(2)21-11-12-23-22(29(21,6)15-14-25(33)34)13-16-30(7)26(24(32)17-31(23,30)8)20(27(35)36)10-9-19(3)28(4,5)37/h20-21,24,26,32,37H,1,3,9-17H2,2,4-8H3,(H,33,34)(H,35,36)/t20?,21-,24+,26-,29-,30+,31-/m0/s1	ZUQVIKQNZXSXML-OHUXFVNZSA-N	Organic compounds	Lipids and lipid-like molecules	Prenol lipids	Triterpenoids
203	MSID000203	25-Methoxyporicoic acid A	CID_46882628	C32H48O6	COC(C(=C)CC[C@H]([C@H]1[C@H](O)C[C@@]2([C@]1(C)CC=C1C2=CC[C@H]([C@]1(C)CCC(=O)O)C(=C)C)C)C(=O)O)(C)C	InChI=1S/C32H48O6/c1-19(2)22-12-13-24-23(30(22,6)16-15-26(34)35)14-17-31(7)27(25(33)18-32(24,31)8)21(28(36)37)11-10-20(3)29(4,5)38-9/h13-14,21-22,25,27,33H,1,3,10-12,15-18H2,2,4-9H3,(H,34,35)(H,36,37)/t21-,22+,25-,27+,30+,31-,32+/m1/s1	VZIHBVSTTFISKH-CPCIMIGGSA-N	Organic compounds	Lipids and lipid-like molecules	Prenol lipids	Triterpenoids
204	MSID000204	Artabotryol C1	CID_102053447,CID_102081036	C31H52O3	CO[C@@H]1O[C@@H](CC[C@H]1C)[C@H]([C@H]1CC[C@@]2([C@]1(C)CCC1=C2CC[C@@H]2[C@]1(C)CC[C@H](C2(C)C)O)C)C	InChI=1S/C31H52O3/c1-19-9-11-24(34-27(19)33-8)20(2)21-13-17-31(7)23-10-12-25-28(3,4)26(32)15-16-29(25,5)22(23)14-18-30(21,31)6/h19-21,24-27,32H,9-18H2,1-8H3/t19-,20+,21-,24+,25+,26-,27-,29-,30-,31+/m1/s1	GXUWTINUKVNWNB-JFBDEKQASA-N	Organic compounds	Lipids and lipid-like molecules	Prenol lipids	Triterpenoids
205	MSID000205	26-Hydroxy-5 a -lanosta-7,9(11),24-triene-3,22-dione	CID_102011670	C30H44O3	OC/C(=C/CC(=O)[C@H]([C@H]1CC[C@@]2([C@]1(C)CC=C1C2=CC[C@@H]2[C@]1(C)CCC(=O)C2(C)C)C)C)/C	InChI=1S/C30H44O3/c1-19(18-31)8-10-24(32)20(2)21-12-16-30(7)23-9-11-25-27(3,4)26(33)14-15-28(25,5)22(23)13-17-29(21,30)6/h8-9,13,20-21,25,31H,10-12,14-18H2,1-7H3/b19-8+/t20-,21+,25-,28+,29+,30-/m0/s1	CPFRWYYLAGWVEV-BAHOVLMYSA-N	Organic compounds	Lipids and lipid-like molecules	Prenol lipids	Triterpenoids
206	MSID000206	26-Hydroxyporicoic acid DM	CID_44556810	C32H48O7	COC(=O)CC[C@@]1(C)[C@@H](CC=C2C1=CC[C@]1([C@@]2(C)C[C@H]([C@@H]1C(C(=O)O)CCC(=C)C(CO)(O)C)O)C)C(=C)C	InChI=1S/C32H48O7/c1-19(2)22-11-12-24-23(29(22,4)15-14-26(35)39-8)13-16-30(5)27(25(34)17-31(24,30)6)21(28(36)37)10-9-20(3)32(7,38)18-33/h12-13,21-22,25,27,33-34,38H,1,3,9-11,14-18H2,2,4-8H3,(H,36,37)/t21?,22-,25+,27-,29-,30+,31-,32?/m0/s1	VWGBTUVMVDGTRM-XZUPHIJISA-N	Organic compounds	Lipids and lipid-like molecules	Prenol lipids	Triterpenoids
207	MSID000207	26,27-Dihydroxy-5 a -lanosta-7,9(11),24-triene-3,22-dione	CID_102011669	C30H44O4	OCC(=CCC(=O)[C@H]([C@H]1CC[C@@]2([C@]1(C)CC=C1C2=CC[C@@H]2[C@]1(C)CCC(=O)C2(C)C)C)C)CO	InChI=1S/C30H44O4/c1-19(24(33)9-7-20(17-31)18-32)21-11-15-30(6)23-8-10-25-27(2,3)26(34)13-14-28(25,4)22(23)12-16-29(21,30)5/h7-8,12,19,21,25,31-32H,9-11,13-18H2,1-6H3/t19-,21+,25-,28+,29+,30-/m0/s1	RJDPCEHRSNQFNS-ZVUAKGHBSA-N	Organic compounds	Lipids and lipid-like molecules	Prenol lipids	Triterpenoids
208	MSID000208	26,27-Dihydroxylanosta-7,9(11),24-trien-3,16-dione	CID_21159042	C30H44O4	OCC(=CCC[C@H]([C@H]1C(=O)C[C@@]2([C@]1(C)CC=C1C2=CC[C@@H]2[C@]1(C)CCC(=O)C2(C)C)C)C)CO	InChI=1S/C30H44O4/c1-19(8-7-9-20(17-31)18-32)26-23(33)16-30(6)22-10-11-24-27(2,3)25(34)13-14-28(24,4)21(22)12-15-29(26,30)5/h9-10,12,19,24,26,31-32H,7-8,11,13-18H2,1-6H3/t19-,24+,26+,28-,29-,30+/m1/s1	KWZNLJRIABJHPG-IOSWJYSCSA-N	Organic compounds	Lipids and lipid-like molecules	Prenol lipids	Triterpenoids
209	MSID000209	29-Hydroxydehydropachymic acid	CID_137355885	C33H50O6	OC[C@@]1(C)[C@H](CC[C@]2([C@H]1CC=C1C2=CC[C@]2([C@@]1(C)C[C@H]([C@@H]2[C@H](C(=O)O)CCC(=C)C(C)C)O)C)C)OC(=O)C	InChI=1S/C33H50O6/c1-19(2)20(3)9-10-22(29(37)38)28-25(36)17-33(8)24-11-12-26-30(5,23(24)13-16-32(28,33)7)15-14-27(39-21(4)35)31(26,6)18-34/h11,13,19,22,25-28,34,36H,3,9-10,12,14-18H2,1-2,4-8H3,(H,37,38)/t22-,25-,26-,27+,28+,30-,31-,32-,33+/m1/s1	USCUFHFTPQCOLH-YXMYOOBPSA-N	Organic compounds	Lipids and lipid-like molecules	Prenol lipids	Triterpenoids
210	MSID000210	29-Hydroxypolyporenic acid C	CID_139585448	C31H46O5	OC[C@@]1(C)C(=O)CC[C@]2([C@H]1CC=C1C2=CC[C@]2([C@@]1(C)C[C@H]([C@@H]2[C@H](C(=O)O)CCC(=C)C(C)C)O)C)C	InChI=1S/C31H46O5/c1-18(2)19(3)8-9-20(27(35)36)26-23(33)16-31(7)22-10-11-24-28(4,21(22)12-15-30(26,31)6)14-13-25(34)29(24,5)17-32/h10,12,18,20,23-24,26,32-33H,3,8-9,11,13-17H2,1-2,4-7H3,(H,35,36)/t20-,23-,24-,26+,28-,29-,30-,31+/m1/s1	WMGIVNDVJFWFEU-ROUXZGEUSA-N	Organic compounds	Lipids and lipid-like molecules	Steroids and steroid derivatives	Bile acids, alcohols and derivatives
211	MSID000211	2beta-Methoxy-3a,9a-dihydroxyergosta-7,22	CID_139588260	C29H48O3	CO[C@H]1C[C@@]2(C)C(C[C@@H]1O)CC=C1[C@]2(O)CC[C@]2(C1CC[C@@H]2[C@@H](/C=C/[C@@H](C(C)C)C)C)C	InChI=1S/C29H48O3/c1-18(2)19(3)8-9-20(4)22-12-13-23-24-11-10-21-16-25(30)26(32-7)17-28(21,6)29(24,31)15-14-27(22,23)5/h8-9,11,18-23,25-26,30-31H,10,12-17H2,1-7H3/b9-8+/t19-,20+,21?,22+,23?,25-,26-,27+,28-,29+/m0/s1	AQPFYTGLRKZIIW-DJNFYPBISA-N	Organic compounds	Lipids and lipid-like molecules	Steroids and steroid derivatives	Ergostane steroids
212	MSID000212	3-(4-Hydroxyphenyl)-4-isobutyl-1h-pyrrole-2,5-dione	CID_25067897	C14H15NO3	CC(CC1=C(C(=O)NC1=O)c1ccc(cc1)O)C	InChI=1S/C14H15NO3/c1-8(2)7-11-12(14(18)15-13(11)17)9-3-5-10(16)6-4-9/h3-6,8,16H,7H2,1-2H3,(H,15,17,18)	BAZBYJXDEUDANE-UHFFFAOYSA-N	Organic compounds	Benzenoids	Phenols	1-hydroxy-2-unsubstituted benzenoids
213	MSID000213	3-(4-Methoxy-2-oxo-2h-pyran-6-yl)-propanoic acid	CID_24123426	C9H10O5	COc1cc(CCC(=O)O)oc(=O)c1	InChI=1S/C9H10O5/c1-13-7-4-6(2-3-8(10)11)14-9(12)5-7/h4-5H,2-3H2,1H3,(H,10,11)	ANMIXQYGZDPTLJ-UHFFFAOYSA-N	Organic compounds	Organoheterocyclic compounds	Pyrans	Pyranones and derivatives
214	MSID000214	3-(Hydroxymethyl)-4-methylfuran-2(5h)-one	CID_25178260	C6H8O3	OCC1=C(C)COC1=O	InChI=1S/C6H8O3/c1-4-3-9-6(8)5(4)2-7/h7H,2-3H2,1H3	HVNDECDCMWQSGR-UHFFFAOYSA-N	Organic compounds	Organoheterocyclic compounds	Dihydrofurans	Furanones
215	MSID000215	3-Acetyl-4-methoxybenzoic acid	CID_18184450	C10H10O4	COc1ccc(cc1C(=O)C)C(=O)O	InChI=1S/C10H10O4/c1-6(11)8-5-7(10(12)13)3-4-9(8)14-2/h3-5H,1-2H3,(H,12,13)	NPCYEBHVHXQCEM-UHFFFAOYSA-N	Organic compounds	Organic oxygen compounds	Organooxygen compounds	Carbonyl compounds
216	MSID000216	3-Deoxysambucinol	CID_100969597	C15H22O3	OC[C@@]12O[C@@]34O[C@@H]1CC[C@]2(C)[C@@]3(C)CCC(=C4)C	InChI=1S/C15H22O3/c1-10-4-6-13(3)12(2)7-5-11-14(12,9-16)18-15(13,8-10)17-11/h8,11,16H,4-7,9H2,1-3H3/t11-,12-,13-,14-,15-/m1/s1	SFDJEINPFSNJBN-KJWHEZOQSA-N	Organic compounds	Organoheterocyclic compounds	Oxepanes
217	MSID000217	3-Epidehydropachymic acid	CID_15226716	C33H50O5	CC(=O)O[C@@H]1CC[C@]2([C@H](C1(C)C)CC=C1C2=CC[C@]2([C@@]1(C)C[C@H]([C@@H]2[C@H](C(=O)O)CCC(=C)C(C)C)O)C)C	InChI=1S/C33H50O5/c1-19(2)20(3)10-11-22(29(36)37)28-25(35)18-33(9)24-12-13-26-30(5,6)27(38-21(4)34)15-16-31(26,7)23(24)14-17-32(28,33)8/h12,14,19,22,25-28,35H,3,10-11,13,15-18H2,1-2,4-9H3,(H,36,37)/t22-,25-,26+,27-,28+,31-,32-,33+/m1/s1	RWIALJIVPUCERT-ROLXBSRMSA-N	Organic compounds	Lipids and lipid-like molecules	Prenol lipids	Triterpenoids
218	MSID000218	Dehydropachymic acid	CID_15226717	C33H50O5	CC(=O)O[C@H]1CC[C@]2([C@H](C1(C)C)CC=C1C2=CC[C@]2([C@@]1(C)C[C@H]([C@@H]2[C@H](C(=O)O)CCC(=C)C(C)C)O)C)C	InChI=1S/C33H50O5/c1-19(2)20(3)10-11-22(29(36)37)28-25(35)18-33(9)24-12-13-26-30(5,6)27(38-21(4)34)15-16-31(26,7)23(24)14-17-32(28,33)8/h12,14,19,22,25-28,35H,3,10-11,13,15-18H2,1-2,4-9H3,(H,36,37)/t22-,25-,26+,27+,28+,31-,32-,33+/m1/s1	RWIALJIVPUCERT-DRCQUEPLSA-N	Organic compounds	Lipids and lipid-like molecules	Prenol lipids	Triterpenoids
219	MSID000219	3-Ethyl-3-octene	CID_543800	C10H20	CCCCC=C(CC)CC	InChI=1S/C10H20/c1-4-7-8-9-10(5-2)6-3/h9H,4-8H2,1-3H3	KNIRLWRQSSLZCZ-UHFFFAOYSA-N	Organic compounds	Hydrocarbons	Unsaturated hydrocarbons	Branched unsaturated hydrocarbons
220	MSID000220	3-Hydroxy-2-oxo-2h-chromene-4,6-dicarboxylic acid	CID_139589357	C11H6O7	OC(=O)c1c(O)c(=O)oc2c1cc(cc2)C(=O)O	InChI=1S/C11H6O7/c12-8-7(10(15)16)5-3-4(9(13)14)1-2-6(5)18-11(8)17/h1-3,12H,(H,13,14)(H,15,16)	JWBZNSYPSLWKPA-UHFFFAOYSA-N	Organic compounds	Phenylpropanoids and polyketides	Coumarins and derivatives	Hydroxycoumarins
221	MSID000221	3-Hydroxyhericenone F	CID_44588861	C35H54O7	CCCCCCCCCCCCCCCC(=O)OCc1cc(OC)c2c(c1C=O)O[C@@]([C@H](C2)O)(C)CC(=O)C=C(C)C	InChI=1S/C35H54O7/c1-6-7-8-9-10-11-12-13-14-15-16-17-18-19-33(39)41-25-27-21-31(40-5)29-22-32(38)35(4,23-28(37)20-26(2)3)42-34(29)30(27)24-36/h20-21,24,32,38H,6-19,22-23,25H2,1-5H3/t32-,35-/m0/s1	VRVNUMYDBOJZOP-SHUZPENHSA-N	Organic compounds	Organoheterocyclic compounds	Benzopyrans	1-benzopyrans
222	MSID000222	3-Isobutyl-4-[4-(3-methyl-2-butenyloxy)phenyl]-1h-pyrrol-1-ol-2,5-dione	CID_641729	C19H23NO4	CC(=CCOc1ccc(cc1)C1=C(CC(C)C)C(=O)N(C1=O)O)C	InChI=1S/C19H23NO4/c1-12(2)9-10-24-15-7-5-14(6-8-15)17-16(11-13(3)4)18(21)20(23)19(17)22/h5-9,13,23H,10-11H2,1-4H3	OJSZXJGYUVZRNU-UHFFFAOYSA-N	Organic compounds	Benzenoids	Phenol ethers
223	MSID000223	3-Isobutyl-4-[4-(3-methyl-2-butenyloxy)phenyl]-1h-pyrrole-2,5-dione	CID_5255246	C19H23NO3	CC(=CCOc1ccc(cc1)C1=C(CC(C)C)C(=O)NC1=O)C	InChI=1S/C19H23NO3/c1-12(2)9-10-23-15-7-5-14(6-8-15)17-16(11-13(3)4)18(21)20-19(17)22/h5-9,13H,10-11H2,1-4H3,(H,20,21,22)	AILGRWSIRAPLCJ-UHFFFAOYSA-N	Organic compounds	Benzenoids	Phenol ethers
224	MSID000224	3-Isobutyl-4-[4-(3-methyl-2-butenyloxy)phenyl]furan-2,5-dione	CID_10470895	C19H22O4	CC(=CCOc1ccc(cc1)C1=C(CC(C)C)C(=O)OC1=O)C	InChI=1S/C19H22O4/c1-12(2)9-10-22-15-7-5-14(6-8-15)17-16(11-13(3)4)18(20)23-19(17)21/h5-9,13H,10-11H2,1-4H3	ZXIUCXGVUOQMSH-UHFFFAOYSA-N	Organic compounds	Benzenoids	Phenol ethers
225	MSID000225	3-O-acetyl-16a-hydroxytrametenolic acid	CID_15226712	C32H50O5	CC(=CCC[C@H]([C@H]1[C@H](O)C[C@@]2([C@]1(C)CCC1=C2CC[C@@H]2[C@]1(C)CC[C@@H](C2(C)C)OC(=O)C)C)C(=O)O)C	InChI=1S/C32H50O5/c1-19(2)10-9-11-21(28(35)36)27-24(34)18-32(8)23-12-13-25-29(4,5)26(37-20(3)33)15-16-30(25,6)22(23)14-17-31(27,32)7/h10,21,24-27,34H,9,11-18H2,1-8H3,(H,35,36)/t21-,24-,25+,26+,27+,30-,31-,32+/m1/s1	SRDNLMOBFKJOSD-KOCSMGCBSA-N	Organic compounds	Lipids and lipid-like molecules	Prenol lipids	Triterpenoids
226	MSID000226	3-O-acetyldehydroeburicoic acid	CID_139586183	C31H46O6	COC(=O)CC[C@@]1(C)C(CC=C2C1=CC[C@]1([C@@]2(C)C[C@H]([C@@H]1C(C(=O)O)CC/C=C(\CO)/C)O)C)C(=C)C	InChI=1S/C31H46O6/c1-19(2)22-11-12-24-23(29(22,4)15-14-26(34)37-7)13-16-30(5)27(25(33)17-31(24,30)6)21(28(35)36)10-8-9-20(3)18-32/h9,12-13,21-22,25,27,32-33H,1,8,10-11,14-18H2,2-7H3,(H,35,36)/b20-9-/t21?,22?,25-,27+,29+,30-,31+/m1/s1	OPDCNCKCFNXEMG-BOCBPPTNSA-N	Organic compounds	Lipids and lipid-like molecules	Prenol lipids	Triterpenoids
227	MSID000227	3-O-acetylganoderic acid K	CID_101491701	C32H46O8	O=C(C[C@H]([C@H]1C[C@@H]([C@@]2([C@]1(C)CC(=O)C1=C2C(=O)C[C@@H]2[C@]1(C)CC[C@@H](C2(C)C)OC(=O)C)C)O)C)CC(C(=O)O)C	InChI=1S/C32H46O8/c1-16(11-19(34)12-17(2)28(38)39)20-13-24(37)32(8)27-21(35)14-23-29(4,5)25(40-18(3)33)9-10-30(23,6)26(27)22(36)15-31(20,32)7/h16-17,20,23-25,37H,9-15H2,1-8H3,(H,38,39)/t16-,17?,20-,23+,24+,25+,30+,31-,32+/m1/s1	POQMIGQCVPIYKY-QDUVPPPZSA-N	Organic compounds	Lipids and lipid-like molecules	Prenol lipids	Triterpenoids
228	MSID000228	3, 4-Dihydroxyl-benzalacetone	CID_9942292	C10H10O3	CC(=O)/C=C/c1ccc(c(c1)O)O	InChI=1S/C10H10O3/c1-7(11)2-3-8-4-5-9(12)10(13)6-8/h2-6,12-13H,1H3/b3-2+	YIFZKRGUGKLILR-NSCUHMNNSA-N	Organic compounds	Phenylpropanoids and polyketides	Cinnamic acids and derivatives	Hydroxycinnamic acids and derivatives
229	MSID000229	3,11,15-Trihydroxydrimene	CID_71665841	C15H26O3	OC[C@H]1C(=CC[C@@H]2[C@]1(C)CC[C@H]([C@]2(C)CO)O)C	InChI=1S/C15H26O3/c1-10-4-5-12-14(2,11(10)8-16)7-6-13(18)15(12,3)9-17/h4,11-13,16-18H,5-9H2,1-3H3/t11-,12+,13+,14+,15+/m0/s1	UYMHEXBKIPYBOX-NJVJYBDUSA-N	Organic compounds	Organic oxygen compounds	Organooxygen compounds	Alcohols and polyols
230	MSID000230	3,14,25-Trihydroxy-24-hydroxymethylergosta-7,22-dien-6-one	CID_139591390	C28H44O5	OC[C@H](C(O)(C)C)/C=C/[C@H]([C@H]1CC[C@@]2([C@]1(C)CC[C@H]1C2=CC(=O)[C@@H]2[C@]1(C)CC[C@@H](C2)O)O)C	InChI=1S/C28H44O5/c1-17(6-7-18(16-29)25(2,3)32)20-10-13-28(33)22-15-24(31)23-14-19(30)8-11-26(23,4)21(22)9-12-27(20,28)5/h6-7,15,17-21,23,29-30,32-33H,8-14,16H2,1-5H3/b7-6+/t17-,18-,19+,20-,21+,23-,26-,27-,28-/m1/s1	KZXSEYDTLJXXRM-DQXYIBCXSA-N	Organic compounds	Lipids and lipid-like molecules	Steroids and steroid derivatives	Ergostane steroids
231	MSID000231	3,4-Dihydroxy-benzoic acid	CID_72	C7H6O4	OC(=O)c1ccc(c(c1)O)O	InChI=1S/C7H6O4/c8-5-2-1-4(7(10)11)3-6(5)9/h1-3,8-9H,(H,10,11)	YQUVCSBJEUQKSH-UHFFFAOYSA-N	Organic compounds	Benzenoids	Benzene and substituted derivatives	Benzoic acids and derivatives
232	MSID000232	3,4-Dihydroxybenzaldehyde	CID_8768	C7H6O3	O=Cc1ccc(c(c1)O)O	InChI=1S/C7H6O3/c8-4-5-1-2-6(9)7(10)3-5/h1-4,9-10H	IBGBGRVKPALMCQ-UHFFFAOYSA-N	Organic compounds	Organic oxygen compounds	Organooxygen compounds	Carbonyl compounds
233	MSID000233	3,4-Dihydroxyphenylethanol	CID_82755	C8H10O3	OCCc1ccc(c(c1)O)O	InChI=1S/C8H10O3/c9-4-3-6-1-2-7(10)8(11)5-6/h1-2,5,9-11H,3-4H2	JUUBCHWRXWPFFH-UHFFFAOYSA-N	Organic compounds	Benzenoids	Phenols	Tyrosols and derivatives
234	MSID000234	3,4-Secocucurbita-4,24e-diene-3-hydroxy-26-carboxylic acid	CID_71511652	C30H50O3	OCCC[C@@H]1C(=C(C)C)CC[C@@H]2[C@@]1(C)CC[C@]1([C@@]2(C)CC[C@@H]1[C@@H](CC/C=C(/C(=O)O)\C)C)C	InChI=1S/C30H50O3/c1-20(2)23-13-14-26-28(5,25(23)12-9-19-31)17-18-29(6)24(15-16-30(26,29)7)21(3)10-8-11-22(4)27(32)33/h11,21,24-26,31H,8-10,12-19H2,1-7H3,(H,32,33)/b22-11+/t21-,24-,25-,26-,28+,29-,30+/m1/s1	CZJIGFJHVBSALM-CWZIPENLSA-N	Organic compounds	Lipids and lipid-like molecules	Prenol lipids	Triterpenoids
235	MSID000235	3,6-Dibenzyl-2-hydroxy-5-methoxypyrazine	CID_10494866	C19H18N2O2	COc1nc(Cc2ccccc2)c(=O)[nH]c1Cc1ccccc1	InChI=1S/C19H18N2O2/c1-23-19-17(13-15-10-6-3-7-11-15)20-18(22)16(21-19)12-14-8-4-2-5-9-14/h2-11H,12-13H2,1H3,(H,20,22)	HDGSSKSUEFFBRK-UHFFFAOYSA-N	Organic compounds	Organoheterocyclic compounds	Diazines	Pyrazines
236	MSID000236	3,7-Dimethyl-1,6-octadiene-3,4,5-triol	CID_100935235	C10H18O3	C=CC(C(C(C=C(C)C)O)O)(O)C	InChI=1S/C10H18O3/c1-5-10(4,13)9(12)8(11)6-7(2)3/h5-6,8-9,11-13H,1H2,2-4H3	UBKAPFPNNLGJBH-UHFFFAOYSA-N	Organic compounds	Lipids and lipid-like molecules	Prenol lipids	Monoterpenoids
237	MSID000237	3,7-Dimethylocta-1,6-dien-3-ol(linalool)	CID_6549	C10H18O	C=CC(CCC=C(C)C)(O)C	InChI=1S/C10H18O/c1-5-10(4,11)8-6-7-9(2)3/h5,7,11H,1,6,8H2,2-4H3	CDOSHBSSFJOMGT-UHFFFAOYSA-N	Organic compounds	Lipids and lipid-like molecules	Prenol lipids	Monoterpenoids
238	MSID000238	3,9,25-Trihydroxy-24-hydroxymethylergosta-7,22-dien-6-one	CID_139591389	C28H44O5	OC[C@H](C(O)(C)C)/C=C/[C@H]([C@H]1CC[C@@H]2[C@]1(C)CC[C@]1(C2=CC(=O)[C@@H]2[C@]1(C)CC[C@@H](C2)O)O)C	InChI=1S/C28H44O5/c1-17(6-7-18(16-29)25(2,3)32)20-8-9-21-22-15-24(31)23-14-19(30)10-11-27(23,5)28(22,33)13-12-26(20,21)4/h6-7,15,17-21,23,29-30,32-33H,8-14,16H2,1-5H3/b7-6+/t17-,18-,19+,20-,21+,23-,26-,27+,28-/m1/s1	MATNISOMNFTJPH-KWFWYRGISA-N	Organic compounds	Lipids and lipid-like molecules	Steroids and steroid derivatives	Ergostane steroids
239	MSID000239	3a-(3-Hydroxy-5-methoxy-3-methyl-1,5-dioxopentyloxy)-24-methylene-5 a -lanost-8-en-21-oic acid	CID_24796273	C38H60O7	COC(=O)CC(CC(=O)O[C@@H]1CC[C@]2([C@H](C1(C)C)CCC1=C2CC[C@]2([C@@]1(C)CC[C@@H]2[C@H](C(=O)O)CCC(=C)C(C)C)C)C)(O)C	InChI=1S/C38H60O7/c1-23(2)24(3)11-12-25(33(41)42)26-15-19-38(9)28-13-14-29-34(4,5)30(45-32(40)22-35(6,43)21-31(39)44-10)17-18-36(29,7)27(28)16-20-37(26,38)8/h23,25-26,29-30,43H,3,11-22H2,1-2,4-10H3,(H,41,42)/t25-,26-,29+,30-,35?,36-,37-,38+/m1/s1	VKMZACSYECLFAU-HNBNAWJQSA-N	Organic compounds	Lipids and lipid-like molecules	Prenol lipids	Triterpenoids
240	MSID000240	3a,15a -Diacetoxy-22a -hydroxylanosta-7,9(11),24-trien-26-oic acid	CID_139583632	C34H50O7	CC(=O)O[C@H]1C[C@@H]([C@@]2([C@]1(C)C1=CCC3[C@](C1=CC2)(C)CC[C@H](C3(C)C)OC(=O)C)C)C([C@@H](C/C=C(/C(=O)O)\C)O)C	InChI=1S/C34H50O7/c1-19(30(38)39)10-12-26(37)20(2)25-18-29(41-22(4)36)34(9)24-11-13-27-31(5,6)28(40-21(3)35)15-16-32(27,7)23(24)14-17-33(25,34)8/h10-11,14,20,25-29,37H,12-13,15-18H2,1-9H3,(H,38,39)/b19-10+/t20?,25-,26-,27?,28-,29+,32-,33-,34-/m1/s1	XITBGHDSLKRVMR-GJGAYOQOSA-N	Organic compounds	Lipids and lipid-like molecules	Prenol lipids	Triterpenoids
241	MSID000241	3b,15a -Diacetoxy-22a-hydroxylanosta-7,9(11),24-trien-26-oic acid		C34H50O7	CC(=O)O[C@H]1C[C@@H]([C@@]2([C@]1(C)C1=CCC3[C@](C1=CC2)(C)CC[C@@H](C3(C)C)OC(=O)C)C)[C@@H]([C@@H](C/C=C(/C(=O)O)\C)O)C	InChI=1S/C34H50O7/c1-19(30(38)39)10-12-26(37)20(2)25-18-29(41-22(4)36)34(9)24-11-13-27-31(5,6)28(40-21(3)35)15-16-32(27,7)23(24)14-17-33(25,34)8/h10-11,14,20,25-29,37H,12-13,15-18H2,1-9H3,(H,38,39)/b19-10+/t20-,25+,26+,27?,28-,29-,32+,33+,34+/m0/s1	XITBGHDSLKRVMR-IVBDKYIYSA-N	Organic compounds	Lipids and lipid-like molecules	Prenol lipids	Triterpenoids
242	MSID000242	3b,15 a -Diacetoxy lanosta-8,24-dien-26-oic acid	CID_131751991	C34H52O6	CC(=O)O[C@H]1C[C@@H]([C@@]2([C@]1(C)C1=C(CC2)[C@@]2(C(CC1)C(C)(C)[C@H](CC2)OC(=O)C)C)C)[C@@H](CC/C=C(/C(=O)O)\C)C	InChI=1S/C34H52O6/c1-20(11-10-12-21(2)30(37)38)26-19-29(40-23(4)36)34(9)25-13-14-27-31(5,6)28(39-22(3)35)16-17-32(27,7)24(25)15-18-33(26,34)8/h12,20,26-29H,10-11,13-19H2,1-9H3,(H,37,38)/b21-12+/t20-,26-,27?,28+,29+,32-,33-,34-/m1/s1	FFHZCNIREJAVOS-FHWYVJHPSA-N	Organic compounds	Lipids and lipid-like molecules	Prenol lipids	Triterpenoids
243	MSID000243	3b,5a,6a-Trihydroxyergosta-7,22-diene 6-o-benzoate	CID_139584507	C35H50O4	O[C@H]1CC[C@]2([C@@](C1)(O)[C@H](C=C1C2CC[C@]2(C1CC[C@@H]2[C@@H](/C=C/[C@@H](C(C)C)C)C)C)OC(=O)c1ccccc1)C	InChI=1S/C35H50O4/c1-22(2)23(3)12-13-24(4)28-14-15-29-27-20-31(39-32(37)25-10-8-7-9-11-25)35(38)21-26(36)16-19-34(35,6)30(27)17-18-33(28,29)5/h7-13,20,22-24,26,28-31,36,38H,14-19,21H2,1-6H3/b13-12+/t23-,24+,26-,28+,29?,30?,31-,33+,34+,35-/m0/s1	QPEMNZQKGBYUMV-LQMRAOCTSA-N	Organic compounds	Lipids and lipid-like molecules	Steroids and steroid derivatives	Ergostane steroids
244	MSID000244	3beta-Hydroxy-lanosta-8,24-dien-21-al	CID_180709,CID_44581610	C30H48O2	O=C[C@@H]([C@H]1CC[C@@]2([C@]1(C)CCC1=C2CC[C@@H]2[C@]1(C)CC[C@@H](C2(C)C)O)C)CCC=C(C)C	InChI=1S/C30H48O2/c1-20(2)9-8-10-21(19-31)22-13-17-30(7)24-11-12-25-27(3,4)26(32)15-16-28(25,5)23(24)14-18-29(22,30)6/h9,19,21-22,25-26,32H,8,10-18H2,1-7H3/t21-,22+,25-,26-,28+,29+,30-/m0/s1	BDXXTCGLJBYHHM-ILLHTMCHSA-N	Organic compounds	Lipids and lipid-like molecules	Prenol lipids	Triterpenoids
245	MSID000245	3beta-Linoleyloxyergosta-7,24(28)-diene	CID_139584963	C46H76O2	CCCCC/C=C\C/C=C\CCCCCCCC(=O)O[C@H]1CC[C@]2([C@H](C1)CC=C1[C@@H]2CC[C@]2([C@H]1CC[C@@H]2[C@@H](CCC(=C)C(C)C)C)C)C	InChI=1S/C46H76O2/c1-8-9-10-11-12-13-14-15-16-17-18-19-20-21-22-23-44(47)48-39-30-32-45(6)38(34-39)26-27-40-42-29-28-41(46(42,7)33-31-43(40)45)37(5)25-24-36(4)35(2)3/h12-13,15-16,27,35,37-39,41-43H,4,8-11,14,17-26,28-34H2,1-3,5-7H3/b13-12-,16-15-/t37-,38+,39+,41-,42+,43+,45+,46-/m1/s1	CGPXQZWXSOOFBC-OQAFIIOUSA-N	Organic compounds	Lipids and lipid-like molecules	Steroids and steroid derivatives	Steroid esters
246	MSID000246	3beta,7beta,20,23xi-Tetrahydroxy-11,15-D	CID_139588566	C30H46O8	OC(CC([C@H]1CC(=O)[C@@]2([C@]1(C)CC(=O)C1=C2[C@@H](O)C[C@@H]2[C@]1(C)CC[C@@H](C2(C)C)O)C)(O)C)CC(C(=O)O)C	InChI=1S/C30H46O8/c1-15(25(36)37)10-16(31)13-29(6,38)20-12-22(35)30(7)24-17(32)11-19-26(2,3)21(34)8-9-27(19,4)23(24)18(33)14-28(20,30)5/h15-17,19-21,31-32,34,38H,8-14H2,1-7H3,(H,36,37)/t15?,16?,17-,19-,20-,21-,27-,28+,29?,30-/m0/s1	WVYAVOPFSOYOIJ-KWLYCBPTSA-N	Organic compounds	Lipids and lipid-like molecules	Prenol lipids	Triterpenoids
247	MSID000247	3R-(2R-hydroxypropyl)-8-hydroxyl-7-methyl-3,4-dihydroisocoumarine	CID_44233882	C13H16O4	C[C@H](C[C@@H]1OC(=O)c2c(C1)ccc(c2O)C)O	InChI=1S/C13H16O4/c1-7-3-4-9-6-10(5-8(2)14)17-13(16)11(9)12(7)15/h3-4,8,10,14-15H,5-6H2,1-2H3/t8-,10+/m1/s1	WDCHVRICDGHOKM-SCZZXKLOSA-N	Organic compounds	Organoheterocyclic compounds	Benzopyrans	2-benzopyrans
248	MSID000248	3R*,4R*-1-hydroxy-3-isobutyl-4-[4-(3-methyl-2-butenyloxy)phenyl]pyrrolidine-2,5-dione	CID_139583762	C19H25NO4	CC(C[C@@H]1C(=O)N(C(=O)[C@H]1c1ccc(cc1)OCC=C(C)C)O)C	InChI=1S/C19H25NO4/c1-12(2)9-10-24-15-7-5-14(6-8-15)17-16(11-13(3)4)18(21)20(23)19(17)22/h5-9,13,16-17,23H,10-11H2,1-4H3/t16-,17-/m0/s1	ZZKUVVFNFOKVQE-IRXDYDNUSA-N	Organic compounds	Organoheterocyclic compounds	Pyrrolidines	Phenylpyrrolidines
249	MSID000249	Antrodin E	CID_10336811	C19H25NO4	CC(C[C@H]1C(=O)N(C(=O)[C@H]1c1ccc(cc1)OCC=C(C)C)O)C	InChI=1S/C19H25NO4/c1-12(2)9-10-24-15-7-5-14(6-8-15)17-16(11-13(3)4)18(21)20(23)19(17)22/h5-9,13,16-17,23H,10-11H2,1-4H3/t16-,17+/m1/s1	ZZKUVVFNFOKVQE-SJORKVTESA-N	Organic compounds	Organoheterocyclic compounds	Pyrrolidines	Phenylpyrrolidines
250	MSID000250	Antrodin D	CID_10314642	C19H25NO4	CC(C[C@H]1C(=O)N(C(=O)[C@@H]1c1ccc(cc1)OCC=C(C)C)O)C	InChI=1S/C19H25NO4/c1-12(2)9-10-24-15-7-5-14(6-8-15)17-16(11-13(3)4)18(21)20(23)19(17)22/h5-9,13,16-17,23H,10-11H2,1-4H3/t16-,17-/m1/s1	ZZKUVVFNFOKVQE-IAGOWNOFSA-N	Organic compounds	Organoheterocyclic compounds	Pyrrolidines	Phenylpyrrolidines
251	MSID000251	Tsugarioside C	CID_10746736	C38H58O8	CC(=O)O[C@@H]1CC[C@]2([C@H](C1(C)C)CCC1=C2CC[C@]2([C@@]1(C)CC[C@@H]2[C@H](C(=O)O[C@@H]1OC[C@H]([C@@H]([C@H]1O)O)O)C/C=C(\C(=C)C)/C)C)C	InChI=1S/C38H58O8/c1-21(2)22(3)10-11-24(33(43)46-34-32(42)31(41)28(40)20-44-34)25-14-18-38(9)27-12-13-29-35(5,6)30(45-23(4)39)16-17-36(29,7)26(27)15-19-37(25,38)8/h10,24-25,28-32,34,40-42H,1,11-20H2,2-9H3/b22-10-/t24-,25-,28-,29+,30-,31+,32-,34+,36-,37-,38+/m1/s1	RJBCIJBIKBHZMX-MGAAYXLPSA-N	Organic compounds	Lipids and lipid-like molecules	Prenol lipids	Triterpenoids
252	MSID000252	3α-Hydroxyoreadone	CID_131751906	C14H20O4	O=C1CC(O)C(C2C1C1C(O)OCC1=CC2)(C)C	InChI=1S/C14H20O4/c1-14(2)8-4-3-7-6-18-13(17)11(7)12(8)9(15)5-10(14)16/h3,8,10-13,16-17H,4-6H2,1-2H3	QWJVXAZUVABFEO-UHFFFAOYSA-N	Organic compounds	Organoheterocyclic compounds	Naphthofurans
253	MSID000253	3β-Linoleyloxyergosta-7,22-diene	CID_137796887	C46H78O	CCCCC/C=C\C/C=C\CCCCCCCCO[C@H]1CC[C@]2(C(C1)CC=C1[C@@H]2CC[C@]2([C@H]1CC[C@@H]2[C@@H](C=C[C@@H](C(C)C)C)C)C)C	InChI=1S/C46H78O/c1-8-9-10-11-12-13-14-15-16-17-18-19-20-21-22-23-34-47-40-30-32-45(6)39(35-40)26-27-41-43-29-28-42(46(43,7)33-31-44(41)45)38(5)25-24-37(4)36(2)3/h12-13,15-16,24-25,27,36-40,42-44H,8-11,14,17-23,26,28-35H2,1-7H3/b13-12-,16-15-,25-24?/t37-,38+,39?,40-,42+,43-,44-,45-,46+/m0/s1	XEQVMBXOJXDARJ-KTWGLXMLSA-N	Organic compounds	Lipids and lipid-like molecules	Steroids and steroid derivatives	Ergostane steroids
254	MSID000254	3β,5α-Dihydroxy-(22e,24r)-ergosta-22-en-7-one-6β-yl oleate	CID_21580602	C46H78O5	CCCCCCCC/C=C\CCCCCCCC(=O)O[C@@H]1C(=O)[C@H]2[C@@H]3CC[C@@H]([C@@]3(C)CC[C@@H]2[C@@]2([C@]1(O)C[C@@H](O)CC2)C)[C@@H](/C=C/[C@@H](C(C)C)C)C	InChI=1S/C46H78O5/c1-8-9-10-11-12-13-14-15-16-17-18-19-20-21-22-23-40(48)51-43-42(49)41-38-27-26-37(35(5)25-24-34(4)33(2)3)44(38,6)30-29-39(41)45(7)31-28-36(47)32-46(43,45)50/h15-16,24-25,33-39,41,43,47,50H,8-14,17-23,26-32H2,1-7H3/b16-15-,25-24+/t34-,35+,36-,37+,38-,39-,41-,43+,44+,45+,46-/m0/s1	YEFGYSYQDJVEFQ-NFCNPGOKSA-N	Organic compounds	Lipids and lipid-like molecules	Steroids and steroid derivatives	Ergostane steroids
255	MSID000255	3β,5α-Dihydroxy-(22e,24r)-ergosta-7,22-dien-6β-yl oleate	CID_21580601	C46H78O4	CCCCCCCC/C=C\CCCCCCCC(=O)O[C@@H]1C=C2[C@@H]3CC[C@@H]([C@@]3(C)CC[C@@H]2[C@@]2([C@]1(O)C[C@@H](O)CC2)C)[C@@H](/C=C/[C@@H](C(C)C)C)C	InChI=1S/C46H78O4/c1-8-9-10-11-12-13-14-15-16-17-18-19-20-21-22-23-43(48)50-42-32-38-40-27-26-39(36(5)25-24-35(4)34(2)3)44(40,6)30-29-41(38)45(7)31-28-37(47)33-46(42,45)49/h15-16,24-25,32,34-37,39-42,47,49H,8-14,17-23,26-31,33H2,1-7H3/b16-15-,25-24+/t35-,36+,37-,39+,40-,41-,42+,44+,45+,46-/m0/s1	XEMBVLIEIXDXDY-WIBAKRLDSA-N	Organic compounds	Lipids and lipid-like molecules	Steroids and steroid derivatives	Ergostane steroids
256	MSID000256	4-[(3R,4S)-3-hydroxy-3,7-dimethylocta- 1,6-dienyl(9z, 12z)- 9,12-octadecadienoate	CID_15895323	C28H48O3	CCCCC/C=C\C/C=C\CCCCCCCC(=O)O[C@H]([C@@](C=C)(O)C)CC=C(C)C	InChI=1S/C28H48O3/c1-6-8-9-10-11-12-13-14-15-16-17-18-19-20-21-22-27(29)31-26(24-23-25(3)4)28(5,30)7-2/h7,11-12,14-15,23,26,30H,2,6,8-10,13,16-22,24H2,1,3-5H3/b12-11-,15-14-/t26-,28+/m0/s1	FFIODWHMPHVNMQ-RCJNOGFCSA-N	Organic compounds	Lipids and lipid-like molecules	Fatty Acyls	Lineolic acids and derivatives
257	MSID000257	4-<(3R,4S)-3-hydroxy-3,7-dimethylocta-1,6-dienyl> (z)-9-octadecenoate	CID_15895322	C28H50O3	CCCCCCCC/C=C\CCCCCCCC(=O)O[C@H]([C@@](C=C)(O)C)CC=C(C)C	InChI=1S/C28H50O3/c1-6-8-9-10-11-12-13-14-15-16-17-18-19-20-21-22-27(29)31-26(24-23-25(3)4)28(5,30)7-2/h7,14-15,23,26,30H,2,6,8-13,16-22,24H2,1,3-5H3/b15-14-/t26-,28+/m0/s1	JJTYTBCWZXNSDI-ZSETUDKCSA-N	Organic compounds	Lipids and lipid-like molecules	Prenol lipids	Monoterpenoids
258	MSID000258	4-Acetyantroquinonol B	CID_53233421	C26H38O7	COC1=C(OC)C(=O)[C@H]([C@H]([C@H]1OC(=O)C)C/C=C(/CC/C=C(/CC1OC(=O)C(C1)C)\C)\C)C	InChI=1S/C26H38O7/c1-15(9-8-10-16(2)13-20-14-17(3)26(29)33-20)11-12-21-18(4)22(28)24(30-6)25(31-7)23(21)32-19(5)27/h10-11,17-18,20-21,23H,8-9,12-14H2,1-7H3/b15-11+,16-10+/t17?,18?,20?,21-,23-/m1/s1	XXAVUEUAHANHQA-POSQGGERSA-N	Organic compounds	Lipids and lipid-like molecules	Prenol lipids	Terpene lactones
259	MSID000259	4-Chloro-3-methoxybenzaldehyde	CID_12909725	C8H7ClO2	COc1cc(C=O)ccc1Cl	InChI=1S/C8H7ClO2/c1-11-8-4-6(5-10)2-3-7(8)9/h2-5H,1H3	BZCOHGUBYSDFET-UHFFFAOYSA-N	Organic compounds	Benzenoids	Benzene and substituted derivatives	Benzoyl derivatives
260	MSID000260	4-Chloro-3,5-dimethoxybenzaldehyde	CID_12398450	C9H9ClO3	COc1cc(C=O)cc(c1Cl)OC	InChI=1S/C9H9ClO3/c1-12-7-3-6(5-11)4-8(13-2)9(7)10/h3-5H,1-2H3	GTEZQOCVTNORJP-UHFFFAOYSA-N	Organic compounds	Benzenoids	Benzene and substituted derivatives	Methoxybenzenes
261	MSID000261	4-Chloro-3,5-dimethoxybenzyl alcohol	CID_84777014	C9H11ClO3	COc1cc(CO)cc(c1Cl)OC	InChI=1S/C9H11ClO3/c1-12-7-3-6(5-11)4-8(13-2)9(7)10/h3-4,11H,5H2,1-2H3	NEORIYMPRMFPGM-UHFFFAOYSA-N	Organic compounds	Benzenoids	Benzene and substituted derivatives	Methoxybenzenes
262	MSID000262	4-Coumaric acid	CID_637542	C9H8O3	OC(=O)/C=C/c1ccc(cc1)O	InChI=1S/C9H8O3/c10-8-4-1-7(2-5-8)3-6-9(11)12/h1-6,10H,(H,11,12)/b6-3+	NGSWKAQJJWESNS-ZZXKWVIFSA-N	Organic compounds	Phenylpropanoids and polyketides	Cinnamic acids and derivatives	Hydroxycinnamic acids and derivatives
263	MSID000263	4-Hydroxy-3-methoxy-2-(3-methylbut-2-en-1-yl)phenyl 2,4-dihydroxy-6-methylbenzoate	CID_102227582	C20H22O6	COc1c(O)ccc(c1CC=C(C)C)OC(=O)c1c(C)cc(cc1O)O	InChI=1S/C20H22O6/c1-11(2)5-6-14-17(8-7-15(22)19(14)25-4)26-20(24)18-12(3)9-13(21)10-16(18)23/h5,7-10,21-23H,6H2,1-4H3	RGGLERSJYRMVRI-UHFFFAOYSA-N	Organic compounds	Phenylpropanoids and polyketides	Depsides and depsidones
264	MSID000264	4-Hydroxy-3,5-dimethoxy benzoic acid 2-hydroxy-1-hydroxymethyl ethyl ester	CID_23583636	C12H16O7	OCC(OC(=O)c1cc(OC)c(c(c1)OC)O)CO	InChI=1S/C12H16O7/c1-17-9-3-7(4-10(18-2)11(9)15)12(16)19-8(5-13)6-14/h3-4,8,13-15H,5-6H2,1-2H3	XNWSHCWMPQATIY-UHFFFAOYSA-N	Organic compounds	Benzenoids	Benzene and substituted derivatives	Benzoic acids and derivatives
265	MSID000265	4-Hydroxybenzoic acid	CID_135	C7H6O3	Oc1ccc(cc1)C(=O)O	InChI=1S/C7H6O3/c8-6-3-1-5(2-4-6)7(9)10/h1-4,8H,(H,9,10)	FJKROLUGYXJWQN-UHFFFAOYSA-N	Organic compounds	Benzenoids	Benzene and substituted derivatives	Benzoic acids and derivatives
266	MSID000266	4-Hydroxysesamin	CID_53321864	C20H18O7	OC1O[C@H]([C@H]2[C@@H]1[C@@H](OC2)c1ccc2c(c1)OCO2)c1ccc2c(c1)OCO2	InChI=1S/C20H18O7/c21-20-17-12(18(27-20)10-1-3-13-15(5-10)25-8-23-13)7-22-19(17)11-2-4-14-16(6-11)26-9-24-14/h1-6,12,17-21H,7-9H2/t12-,17-,18+,19+,20?/m1/s1	AWLJZFUREZNLGG-RXABKWRFSA-N	Organic compounds	Lignans, neolignans and related compounds	Furanoid lignans
267	MSID000267	4-O-methylmelleolide	CID_180718	C24H30O6	O=CC1=C[C@@H]2CC(C[C@@H]2[C@@]2([C@@]1(OC)[C@H](OC(=O)c1c(C)cc(cc1O)O)C2)C)(C)C	InChI=1S/C24H30O6/c1-13-6-16(26)8-18(27)20(13)21(28)30-19-11-23(4)17-10-22(2,3)9-14(17)7-15(12-25)24(19,23)29-5/h6-8,12,14,17,19,26-27H,9-11H2,1-5H3/t14-,17+,19-,23-,24+/m1/s1	GYCBSZGIYPNYAB-GNMVUSIZSA-N	Organic compounds	Lipids and lipid-like molecules	Prenol lipids	Sesquiterpenoids
268	MSID000268	4-Oxohex-1,6-diyl diacetate	CID_139584644	C10H16O5	O=C(CCOC(=O)C)CCCOC(=O)C	InChI=1S/C10H16O5/c1-8(11)14-6-3-4-10(13)5-7-15-9(2)12/h3-7H2,1-2H3	HJFQRIQFIKSCOI-UHFFFAOYSA-N	Organic compounds	Organic acids and derivatives	Carboxylic acids and derivatives	Dicarboxylic acids and derivatives
269	MSID000269	4-Oxohex-5-enyl acetate	CID_139588464	C8H12O3	C=CC(=O)CCCOC(=O)C	InChI=1S/C8H12O3/c1-3-8(10)5-4-6-11-7(2)9/h3H,1,4-6H2,2H3	RXRUTODEGWRIMM-UHFFFAOYSA-N	Organic compounds	Organic oxygen compounds	Organooxygen compounds	Carbonyl compounds
270	MSID000270	4-Vinylresorcinol	CID_10374511	C8H8O2	C=Cc1ccc(cc1O)O	InChI=1S/C8H8O2/c1-2-6-3-4-7(9)5-8(6)10/h2-5,9-10H,1H2	CGVSVWWXNAFRRH-UHFFFAOYSA-N	Organic compounds	Benzenoids	Phenols	Benzenediols
271	MSID000271	4,4'-(Ethane-1,2-diyl)bis(2,3,6-trimethoxyphenol)	CID_139584882	C20H26O8	COc1cc(CCc2cc(OC)c(c(c2OC)OC)O)c(c(c1O)OC)OC	InChI=1S/C20H26O8/c1-23-13-9-11(17(25-3)19(27-5)15(13)21)7-8-12-10-14(24-2)16(22)20(28-6)18(12)26-4/h9-10,21-22H,7-8H2,1-6H3	ULIOCVSRDTXGQE-UHFFFAOYSA-N	Organic compounds	Phenylpropanoids and polyketides	Stilbenes
272	MSID000272	4,6-Dihydroxy-1H-isoindole-1,3(2h)-dione	CID_71519646	C8H5NO4	Oc1cc(O)c2c(c1)C(=O)NC2=O	InChI=1S/C8H5NO4/c10-3-1-4-6(5(11)2-3)8(13)9-7(4)12/h1-2,10-11H,(H,9,12,13)	DXLTWSAVDKIMOT-UHFFFAOYSA-N	Organic compounds	Organoheterocyclic compounds	Isoindoles and derivatives	Isoindolines
273	MSID000273	4,6-Dihydroxy-2,3-dihydro-1h-isoindol-1-one	CID_71551884	C8H7NO3	Oc1cc(O)c2c(c1)C(=O)NC2	InChI=1S/C8H7NO3/c10-4-1-5-6(7(11)2-4)3-9-8(5)12/h1-2,10-11H,3H2,(H,9,12)	PEXQCRHMVUGFFA-UHFFFAOYSA-N	Organic compounds	Organoheterocyclic compounds	Isoindoles and derivatives	Isoindolines
274	MSID000274	4'-Hydroxymethyl-1-phenyl-n-hexan-1-one	CID_129844524	C13H18O2	CCCCCC(=O)c1ccc(cc1)CO	InChI=1S/C13H18O2/c1-2-3-4-5-13(15)12-8-6-11(10-14)7-9-12/h6-9,14H,2-5,10H2,1H3	GGGCQMJCBODCQF-UHFFFAOYSA-N	Organic compounds	Organic oxygen compounds	Organooxygen compounds	Carbonyl compounds
275	MSID000275	5-(2-Hydroxyethyl)-2-furanacetic acid	CID_24776537	C8H10O4	OCCc1ccc(o1)CC(=O)O	InChI=1S/C8H10O4/c9-4-3-6-1-2-7(12-6)5-8(10)11/h1-2,9H,3-5H2,(H,10,11)	QWLLYAHKDUIWRK-UHFFFAOYSA-N	Organic compounds	Organoheterocyclic compounds	Heteroaromatic compounds
276	MSID000276	5-(2',3'-Epoxy-3',3'-dimethylpropoxy)-7-methoxy-6-methylphthalide	CID_139584501	C15H18O5	COc1c(C)c(OCC2OC2(C)C)cc2c1C(=O)OC2	InChI=1S/C15H18O5/c1-8-10(18-7-11-15(2,3)20-11)5-9-6-19-14(16)12(9)13(8)17-4/h5,11H,6-7H2,1-4H3	IGRWJIGTYFRXTD-UHFFFAOYSA-N	Organic compounds	Organoheterocyclic compounds	Isocoumarans	Isobenzofuranones
277	MSID000277	5-(3',3'-Dimethylallyloxy)-7-hydroxy-6-methylphthalide	CID_129861953	C14H16O4	CC(=CCOc1cc2COC(=O)c2c(c1C)O)C	InChI=1S/C14H16O4/c1-8(2)4-5-17-11-6-10-7-18-14(16)12(10)13(15)9(11)3/h4,6,15H,5,7H2,1-3H3	OBLRTUOESOIUPD-UHFFFAOYSA-N	Organic compounds	Organoheterocyclic compounds	Isocoumarans	Isobenzofuranones
278	MSID000278	5-(Hydroxymethyl)-2-(prop-1-en-2-yl)cyclohexanol	CID_132279240	C10H18O2	OCC1CCC(C(C1)O)C(=C)C	InChI=1S/C10H18O2/c1-7(2)9-4-3-8(6-11)5-10(9)12/h8-12H,1,3-6H2,2H3	WFCWMXSGKWYJHY-UHFFFAOYSA-N	Organic compounds	Lipids and lipid-like molecules	Prenol lipids	Monoterpenoids
279	MSID000279	5-Hydroxy-3,4,5-trimethylfuran-2(5h)-one	CID_12450693	C7H10O3	O=C1OC(C(=C1C)C)(C)O	InChI=1S/C7H10O3/c1-4-5(2)7(3,9)10-6(4)8/h9H,1-3H3	QCXQZXGUFOMZPQ-UHFFFAOYSA-N	Organic compounds	Organoheterocyclic compounds	Dihydrofurans	Furanones
280	MSID000280	5-Hydroxy-5-(methoxymethyl)-4-methylfuran-2(5h)-one	CID_71664794	C7H10O4	CC1=CC(=O)OC1(O)COC	InChI=1S/C7H10O4/c1-5-3-6(8)11-7(5,9)4-10-2/h3,9H,4H2,1-2H3	URFTVIJCFDWODA-UHFFFAOYSA-N	Organic compounds	Organoheterocyclic compounds	Dihydrofurans	Furanones
281	MSID000281	5-Methyl-2-(3-oxo-1,2,2-trimethylcyclopentyl)benzoquinone	CID_11288067	C15H18O3	O=C1C=C(C)C(=O)C=C1[C@@]1(C)CCC(=O)C1(C)C	InChI=1S/C15H18O3/c1-9-7-12(17)10(8-11(9)16)15(4)6-5-13(18)14(15,2)3/h7-8H,5-6H2,1-4H3/t15-/m1/s1	FZLVOEBHJNRBTE-OAHLLOKOSA-N	Organic compounds	Lipids and lipid-like molecules	Prenol lipids	Sesquiterpenoids
282	MSID000282	5,6-Epoxy-24(r)-methylcholesta-7,22-dien-3β-ol	CID_129716092	C28H44O2	O[C@H]1CC[C@]2(C3(C1)OC3C=C1[C@@H]2CC[C@]2([C@H]1CC[C@@H]2[C@@H](C=C[C@@H](C(C)C)C)C)C)C	InChI=1S/C28H44O2/c1-17(2)18(3)7-8-19(4)22-9-10-23-21-15-25-28(30-25)16-20(29)11-14-27(28,6)24(21)12-13-26(22,23)5/h7-8,15,17-20,22-25,29H,9-14,16H2,1-6H3/t18-,19+,20-,22+,23-,24-,25?,26+,27+,28?/m0/s1	KVMYKLHJBYIOKD-IOAISHTESA-N	Organic compounds	Lipids and lipid-like molecules	Steroids and steroid derivatives	Ergostane steroids
283	MSID000283	5'-O-methylmelledonal	CID_183472	C24H30O8	COc1cc(C)c(c(c1)O)C(=O)O[C@@H]1C[C@]2([C@]1(O)C(=C[C@]1([C@@H]2[C@@H](O)C(C1)(C)C)O)C=O)C	InChI=1S/C24H30O8/c1-12-6-14(31-5)7-15(26)17(12)20(28)32-16-9-22(4)18-19(27)21(2,3)11-23(18,29)8-13(10-25)24(16,22)30/h6-8,10,16,18-19,26-27,29-30H,9,11H2,1-5H3/t16-,18-,19-,22-,23+,24+/m1/s1	PETDNGRBYPTDNI-QSNWBFGMSA-N	Organic compounds	Lipids and lipid-like molecules	Prenol lipids	Sesquiterpenoids
284	MSID000284	5a,8a-Epidioxyergosta-6,9(11),22-trien-3	CID_11112737	C28H42O3	O[C@H]1CC[C@]2([C@@]3(C1)OO[C@@]1(C2=CC[C@]2([C@H]1CC[C@@H]2[C@@H](/C=C/[C@@H](C(C)C)C)C)C)C=C3)C	InChI=1S/C28H42O3/c1-18(2)19(3)7-8-20(4)22-9-10-23-25(22,5)13-12-24-26(6)14-11-21(29)17-27(26)15-16-28(23,24)31-30-27/h7-8,12,15-16,18-23,29H,9-11,13-14,17H2,1-6H3/b8-7+/t19-,20+,21-,22+,23+,25+,26+,27+,28-/m0/s1	FWPYIYVSYQRISA-LEOBWYFPSA-N	Organic compounds	Lipids and lipid-like molecules	Steroids and steroid derivatives	Ergostane steroids
285	MSID000285	Ergosterol peroxide	CID_5351516	C28H44O3	O[C@H]1CC[C@]2([C@@]3(C1)OO[C@@]1([C@@H]2CC[C@]2([C@H]1CC[C@@H]2[C@@H](/C=C/[C@@H](C(C)C)C)C)C)C=C3)C	InChI=1S/C28H44O3/c1-18(2)19(3)7-8-20(4)22-9-10-23-25(22,5)13-12-24-26(6)14-11-21(29)17-27(26)15-16-28(23,24)31-30-27/h7-8,15-16,18-24,29H,9-14,17H2,1-6H3/b8-7+/t19-,20+,21-,22+,23+,24+,25+,26+,27+,28-/m0/s1	VXOZCESVZIRHCJ-KGHQQZOUSA-N	Organic compounds	Lipids and lipid-like molecules	Steroids and steroid derivatives	Ergostane steroids
286	MSID000286	5α,8α-Peroxydehydrotumulosic acid	CID_16736654	C31H46O6	CC(C(=C)CCC([C@H]1[C@H](O)C[C@@]2([C@]1(C)CC=C1[C@]32OO[C@]2([C@]1(C)CC[C@@H](C2(C)C)O)C=C3)C)C(=O)O)C	InChI=1S/C31H46O6/c1-18(2)19(3)9-10-20(25(34)35)24-21(32)17-29(8)28(24,7)13-11-22-27(6)14-12-23(33)26(4,5)31(27)16-15-30(22,29)36-37-31/h11,15-16,18,20-21,23-24,32-33H,3,9-10,12-14,17H2,1-2,4-8H3,(H,34,35)/t20?,21-,23+,24+,27-,28-,29-,30-,31-/m1/s1	NWPSXIIQUKYLPR-WTDMYXIOSA-N	Organic compounds	Lipids and lipid-like molecules	Prenol lipids	Triterpenoids
287	MSID000287	6-Deoxyjacareubin	CID_5281629	C18H14O5	Oc1c2C=CC(Oc2cc2c1c(=O)c1c(o2)c(O)ccc1)(C)C	InChI=1S/C18H14O5/c1-18(2)7-6-9-12(23-18)8-13-14(15(9)20)16(21)10-4-3-5-11(19)17(10)22-13/h3-8,19-20H,1-2H3	NHNIESSJWQBRJW-UHFFFAOYSA-N	Organic compounds	Organoheterocyclic compounds	Benzopyrans	1-benzopyrans
288	MSID000288	6-Hydroxy- 1h-indole-3-acetamide	CID_286538	C10H10N2O2	NC(=O)Cc1c[nH]c2c1ccc(c2)O	InChI=1S/C10H10N2O2/c11-10(14)3-6-5-12-9-4-7(13)1-2-8(6)9/h1-2,4-5,12-13H,3H2,(H2,11,14)	PGXXGODNTPWQHZ-UHFFFAOYSA-N	Organic compounds	Organoheterocyclic compounds	Indoles and derivatives	Hydroxyindoles
289	MSID000289	6-Hydroxy-1h-indole-3-carbaldehyde	CID_10103438	C9H7NO2	O=Cc1c[nH]c2c1ccc(c2)O	InChI=1S/C9H7NO2/c11-5-6-4-10-9-3-7(12)1-2-8(6)9/h1-5,10,12H	FAFBOYSDWMRMLQ-UHFFFAOYSA-N	Organic compounds	Organoheterocyclic compounds	Indoles and derivatives	Hydroxyindoles
290	MSID000290	6-Hydroxy-4-oxohexyl acetate	CID_139588593	C8H14O4	OCCC(=O)CCCOC(=O)C	InChI=1S/C8H14O4/c1-7(10)12-6-2-3-8(11)4-5-9/h9H,2-6H2,1H3	DMZIZFTYGQIAMJ-UHFFFAOYSA-N	Organic compounds	Lipids and lipid-like molecules	Fatty Acyls	Fatty alcohols
291	MSID000291	6-Methoxy-4-methyl-2,3-(methylenedioxy)phenol	CID_139584300	C9H10O4	COc1cc(C)c2c(c1O)OCO2	InChI=1S/C9H10O4/c1-5-3-6(11-2)7(10)9-8(5)12-4-13-9/h3,10H,4H2,1-2H3	WSHIQZASOWKGFT-UHFFFAOYSA-N	Organic compounds	Organoheterocyclic compounds	Benzodioxoles
292	MSID000292	6,7-Dehydroporicoic acid H	CID_44556878	C31H46O5	OC(=O)CC[C@@]1(C)[C@@H](C=CC2=C1CC[C@]1([C@@]2(C)C[C@H]([C@@H]1C(C(=O)O)CCC(=C)C(C)C)O)C)C(=C)C	InChI=1S/C31H46O5/c1-18(2)20(5)9-10-21(28(35)36)27-25(32)17-31(8)24-12-11-22(19(3)4)29(6,15-14-26(33)34)23(24)13-16-30(27,31)7/h11-12,18,21-22,25,27,32H,3,5,9-10,13-17H2,1-2,4,6-8H3,(H,33,34)(H,35,36)/t21?,22-,25+,27-,29-,30+,31-/m0/s1	HYCQUZBUDTVVSJ-KGXQETAESA-N	Organic compounds	Lipids and lipid-like molecules	Prenol lipids	Triterpenoids
293	MSID000293	6b-Hydroxy-ergosta-4,7,22-trien-3-one	CID_69888966	C28H42O2	CC([C@H](C=C[C@H]([C@H]1CC[C@@H]2[C@]1(C)CC[C@H]1C2=C[C@H](C2=CC(=O)CC[C@]12C)O)C)C)C	InChI=1S/C28H42O2/c1-17(2)18(3)7-8-19(4)22-9-10-23-21-16-26(30)25-15-20(29)11-13-28(25,6)24(21)12-14-27(22,23)5/h7-8,15-19,22-24,26,30H,9-14H2,1-6H3/t18-,19+,22+,23-,24-,26+,27+,28+/m0/s1	IVVQZKHUQOPDBT-LAVZGPSZSA-N	Organic compounds	Lipids and lipid-like molecules	Steroids and steroid derivatives	Ergostane steroids
294	MSID000294	6 a -Hydroxy-ergosta-4,7,22-trien-3-one		C28H42O2	CC(C(/C=C/[C@H]([C@H]1CCC2[C@]1(C)CCC1C2=C[C@@H](C2=CC(=O)CC[C@]12C)O)C)C)C	InChI=1S/C28H42O2/c1-17(2)18(3)7-8-19(4)22-9-10-23-21-16-26(30)25-15-20(29)11-13-28(25,6)24(21)12-14-27(22,23)5/h7-8,15-19,22-24,26,30H,9-14H2,1-6H3/b8-7+/t18?,19-,22-,23?,24?,26+,27-,28-/m1/s1	IVVQZKHUQOPDBT-INWHESTFSA-N	Organic compounds	Lipids and lipid-like molecules	Steroids and steroid derivatives	Ergostane steroids
295	MSID000295	6β,11,12-Trihydroxytremul-1(10)-ene	CID_101891056	C15H26O3	OC[C@H]1[C@@H](CO)CC[C@@]([C@H]2C1=CC(C2)(C)C)(C)O	InChI=1S/C15H26O3/c1-14(2)6-11-12(9-17)10(8-16)4-5-15(3,18)13(11)7-14/h6,10,12-13,16-18H,4-5,7-9H2,1-3H3/t10-,12+,13-,15-/m1/s1	JBCTUOAHMOVMOD-CQROYNQRSA-N	Organic compounds	Organic oxygen compounds	Organooxygen compounds	Alcohols and polyols
296	MSID000296	7-Cis-laetiporic acid	CID_102356186	C27H32O4	OC(=O)CC(C/C=C/C=C\C=C\C=C\C=C\C=C\C=C\C=C/C=C/C=C(/C(=O)C)\C)O	InChI=1S/C27H32O4/c1-24(25(2)28)21-19-17-15-13-11-9-7-5-3-4-6-8-10-12-14-16-18-20-22-26(29)23-27(30)31/h3-21,26,29H,22-23H2,1-2H3,(H,30,31)/b4-3+,7-5+,8-6+,11-9+,12-10+,15-13-,16-14-,19-17+,20-18+,24-21+	KTAMMGIWIFDREV-SLHRBXMBSA-N	Organic compounds	Lipids and lipid-like molecules	Fatty Acyls	Fatty acids and conjugates
297	MSID000297	7-Trans-laetiporic acid	CID_102356187	C27H32O4	OC(=O)CC(C/C=C/C=C/C=C/C=C/C=C/C=C/C=C/C=C\C=C\C=C(\C(=O)C)/C)O	InChI=1S/C27H32O4/c1-24(25(2)28)21-19-17-15-13-11-9-7-5-3-4-6-8-10-12-14-16-18-20-22-26(29)23-27(30)31/h3-21,26,29H,22-23H2,1-2H3,(H,30,31)/b4-3+,7-5+,8-6+,11-9+,12-10+,15-13-,16-14+,19-17+,20-18+,24-21+	KTAMMGIWIFDREV-QVYPJYLCSA-N	Organic compounds	Lipids and lipid-like molecules	Fatty Acyls	Fatty acids and conjugates
298	MSID000298	Laetiporic acid	CID_139588488	C27H32O4	OC(=O)CC(C/C=C/C=C/C=C/C=C/C=C/C=C/C=C/C=C/C=C/C=C(\C(=O)C)/C)O	InChI=1S/C27H32O4/c1-24(25(2)28)21-19-17-15-13-11-9-7-5-3-4-6-8-10-12-14-16-18-20-22-26(29)23-27(30)31/h3-21,26,29H,22-23H2,1-2H3,(H,30,31)/b4-3+,7-5+,8-6+,11-9+,12-10+,15-13+,16-14+,19-17+,20-18+,24-21-	KTAMMGIWIFDREV-LBQULDAPSA-N	Organic compounds	Lipids and lipid-like molecules	Fatty Acyls	Fatty acids and conjugates
299	MSID000299	7-Ergostenol	CID_21116218,CID_5283646	C28H48O	O[C@H]1CC[C@]2([C@H](C1)CC=C1[C@@H]2CC[C@]2([C@H]1CC[C@@H]2[C@@H](CC[C@@H](C(C)C)C)C)C)C	InChI=1S/C28H48O/c1-18(2)19(3)7-8-20(4)24-11-12-25-23-10-9-21-17-22(29)13-15-27(21,5)26(23)14-16-28(24,25)6/h10,18-22,24-26,29H,7-9,11-17H2,1-6H3/t19-,20+,21-,22-,24+,25-,26-,27-,28+/m0/s1	PUGBZUWUTZUUCP-ZRKHGVCBSA-N	Organic compounds	Lipids and lipid-like molecules	Steroids and steroid derivatives	Ergostane steroids
300	MSID000300	7-O-ethyl ganoderic acid O	CID_46894364	C38H58O9	CCO[C@@H]1C[C@H]2C(C)(C)[C@@H](CC[C@@]2(C2=C1[C@]1(C)[C@@H](OC(=O)C)C[C@@H]([C@]1(CC2)C)[C@@H](C(OC(=O)C)C/C=C(/C(=O)O)\C)C)C)OC(=O)C	InChI=1S/C38H58O9/c1-12-44-29-20-30-35(7,8)31(46-24(5)40)16-17-36(30,9)26-15-18-37(10)27(19-32(47-25(6)41)38(37,11)33(26)29)22(3)28(45-23(4)39)14-13-21(2)34(42)43/h13,22,27-32H,12,14-20H2,1-11H3,(H,42,43)/b21-13+/t22-,27+,28?,29+,30-,31+,32-,36+,37+,38-/m0/s1	AECSEKNULZXYNZ-AHVORFFJSA-N	Organic compounds	Lipids and lipid-like molecules	Prenol lipids	Triterpenoids
301	MSID000301	7-Oxo-ganoderic acid Z	CID_71461154	C30H46O4	C[C@@H]([C@H]1CC[C@@]2([C@]1(C)CCC1=C2C(=O)C[C@@H]2[C@]1(C)CC[C@@H](C2(C)C)O)C)CC/C=C(/C(=O)O)\C	InChI=1S/C30H46O4/c1-18(9-8-10-19(2)26(33)34)20-11-16-30(7)25-21(12-15-29(20,30)6)28(5)14-13-24(32)27(3,4)23(28)17-22(25)31/h10,18,20,23-24,32H,8-9,11-17H2,1-7H3,(H,33,34)/b19-10+/t18-,20-,23+,24+,28-,29-,30+/m1/s1	ZNDCXCGTAALLTP-DKYKKQJNSA-N	Organic compounds	Lipids and lipid-like molecules	Prenol lipids	Triterpenoids
302	MSID000302	7,13,14-Trihydroxy-4-cadinen-15-oic acid methyl ester	CID_139591388	C16H26O5	OC[C@H]([C@@H]1CC[C@@](C2C1C=C(CC2)C(=O)OC)(O)CO)C	InChI=1S/C16H26O5/c1-10(8-17)12-5-6-16(20,9-18)14-4-3-11(7-13(12)14)15(19)21-2/h7,10,12-14,17-18,20H,3-6,8-9H2,1-2H3/t10-,12+,13?,14?,16-/m1/s1	QUILJUJWEWGRMX-SBRPMQCUSA-N	Organic compounds	Lipids and lipid-like molecules	Prenol lipids	Sesquiterpenoids
303	MSID000303	7,7a-Diepicoprinastatin 1	CID_49798954	C15H22O2	OC[C@@]1(C)C[C@H]2C(=C(C)C3(C(=C)[C@@H]2O)CC3)C1	InChI=1S/C15H22O2/c1-9-11-6-14(3,8-16)7-12(11)13(17)10(2)15(9)4-5-15/h12-13,16-17H,2,4-8H2,1,3H3/t12-,13-,14+/m0/s1	XUXXDJLUAMCRLH-MELADBBJSA-N	Organic compounds	Organic oxygen compounds	Organooxygen compounds	Alcohols and polyols
304	MSID000304	Coprinastatin 1	CID_45380084	C15H22O2	OC[C@@]1(C)C[C@@H]2C(=C(C)C3(C(=C)[C@H]2O)CC3)C1	InChI=1S/C15H22O2/c1-9-11-6-14(3,8-16)7-12(11)13(17)10(2)15(9)4-5-15/h12-13,16-17H,2,4-8H2,1,3H3/t12-,13-,14-/m1/s1	XUXXDJLUAMCRLH-MGPQQGTHSA-N	Organic compounds	Organic oxygen compounds	Organooxygen compounds	Alcohols and polyols
305	MSID000305	7,8-Dehydronorbotryal	CID_102034774	C14H20O2	O=CC1=C2C(=CC([C@@H]2[C@H](C[C@H]1C)O)(C)C)C	InChI=1S/C14H20O2/c1-8-5-11(16)13-12(10(8)7-15)9(2)6-14(13,3)4/h6-8,11,13,16H,5H2,1-4H3/t8-,11+,13-/m1/s1	MUCYVPPEJHYFEC-YDEJPDAXSA-N	Organic compounds	Organic oxygen compounds	Organooxygen compounds	Alcohols and polyols
306	MSID000306	7a-Acetoxy-15-methoxy-10-O-methyl-deacetyldihydrobotrydial	CID_102034776	C19H32O7	CO[C@@H]1O[C@H](OC)[C@@H]2[C@@]3([C@]1(C)[C@H](OC(=O)C)C([C@@H]3[C@H](C[C@H]2C)O)(C)C)O	InChI=1S/C19H32O7/c1-9-8-11(21)13-17(3,4)15(25-10(2)20)18(5)16(24-7)26-14(23-6)12(9)19(13,18)22/h9,11-16,21-22H,8H2,1-7H3/t9-,11+,12-,13+,14+,15-,16-,18-,19-/m1/s1	JDIHIHVNNCZGOU-YICUCPOMSA-N	Organic compounds	Organoheterocyclic compounds	Oxanes
307	MSID000307	7alpha-Acetoxydeacetylbotryenedial	CID_102034772	C17H24O5	O=CC1=C2[C@@H]([C@H](C[C@H]1C)O)C([C@H]([C@]2(C)C=O)OC(=O)C)(C)C	InChI=1S/C17H24O5/c1-9-6-12(21)14-13(11(9)7-18)17(5,8-19)15(16(14,3)4)22-10(2)20/h7-9,12,14-15,21H,6H2,1-5H3/t9-,12+,14-,15-,17-/m1/s1	LOZDGOGEQSPGNS-RTNSRKOKSA-N	Organic compounds	Organic acids and derivatives	Carboxylic acids and derivatives	Carboxylic acid derivatives
308	MSID000308	7alpha-Acetoxydehydrobotrydienal	CID_102034775	C17H20O4	O=C[C@]1(C)c2c(C=O)c(C)ccc2C([C@H]1OC(=O)C)(C)C	InChI=1S/C17H20O4/c1-10-6-7-13-14(12(10)8-18)17(5,9-19)15(16(13,3)4)21-11(2)20/h6-9,15H,1-5H3/t15-,17-/m1/s1	WSSILCRIAMAUNA-NVXWUHKLSA-N	Organic compounds	Benzenoids	Indanes
309	MSID000309	7alpha-Hydroxybotryenalol	CID_102034773	C17H26O5	O=CC1=C2[C@@H]([C@H](C[C@H]1C)OC(=O)C)C([C@H]([C@]2(C)CO)O)(C)C	InChI=1S/C17H26O5/c1-9-6-12(22-10(2)20)14-13(11(9)7-18)17(5,8-19)15(21)16(14,3)4/h7,9,12,14-15,19,21H,6,8H2,1-5H3/t9-,12+,14-,15-,17-/m1/s1	LCAFIAWKWPMFHH-RTNSRKOKSA-N	Organic compounds	Organic oxygen compounds	Organooxygen compounds	Alcohols and polyols
310	MSID000310	8-Deoxytrichothecin	CID_70690346	C19H26O4	C/C=C\C(=O)O[C@@H]1C[C@@H]2[C@]3([C@@]1(C)[C@@]1(C)CCC(=C[C@H]1O2)C)CO3	InChI=1S/C19H26O4/c1-5-6-16(20)23-14-10-15-19(11-21-19)18(14,4)17(3)8-7-12(2)9-13(17)22-15/h5-6,9,13-15H,7-8,10-11H2,1-4H3/b6-5-/t13-,14-,15-,17+,18-,19+/m1/s1	RBFUHBMJPDGPAT-HULHSAFCSA-N	Organic compounds	Lipids and lipid-like molecules	Prenol lipids	Sesquiterpenoids
311	MSID000311	9-Hydroxycerevistero	CID_637203	C28H46O4	O[C@H]1CC[C@]2([C@@](C1)(O)[C@H](O)C=C1[C@]2(O)CC[C@]2([C@H]1CC[C@@H]2[C@@H](/C=C/[C@@H](C(C)C)C)C)C)C	InChI=1S/C28H46O4/c1-17(2)18(3)7-8-19(4)21-9-10-22-23-15-24(30)28(32)16-20(29)11-12-26(28,6)27(23,31)14-13-25(21,22)5/h7-8,15,17-22,24,29-32H,9-14,16H2,1-6H3/b8-7+/t18-,19+,20-,21+,22-,24+,25+,26+,27+,28-/m0/s1	NYMHFYDQBMRBMB-IUMXJWHTSA-N	Organic compounds	Lipids and lipid-like molecules	Steroids and steroid derivatives	Ergostane steroids
312	MSID000312	Agariblazeispirol A	CID_10250287	C25H34O4	COc1ccc2c(c1C)C=C[C@]13[C@]2(C)CC[C@@H]3[C@@H]([C@]2(O1)OC([C@H]([C@H]2O)C)(C)C)C	InChI=1S/C25H34O4/c1-14-17-10-13-24-18(11-12-23(24,6)19(17)8-9-20(14)27-7)15(2)25(29-24)21(26)16(3)22(4,5)28-25/h8-10,13,15-16,18,21,26H,11-12H2,1-7H3/t15-,16-,18+,21+,23+,24-,25+/m0/s1	XANOSTKMMIEIMI-XJOOGWOKSA-N	Organic compounds	Benzenoids	Naphthalenes
313	MSID000313	Agariblazeispirol B	CID_10430995	C25H34O4	COc1ccc2c(c1C)C=C[C@]13[C@]2(C)CC[C@@H]3[C@@H]([C@@]2(O1)OC([C@H]([C@H]2O)C)(C)C)C	InChI=1S/C25H34O4/c1-14-17-10-13-24-18(11-12-23(24,6)19(17)8-9-20(14)27-7)15(2)25(29-24)21(26)16(3)22(4,5)28-25/h8-10,13,15-16,18,21,26H,11-12H2,1-7H3/t15-,16-,18+,21+,23+,24-,25-/m0/s1	XANOSTKMMIEIMI-TVHHQFAESA-N	Organic compounds	Benzenoids	Naphthalenes
314	MSID000314	Agariblazeispirol C	CID_12183453	C25H32O3	COc1ccc2c(c1C)C=C[C@]13[C@]2(C)CCC3=C(C(=O)[C@H]1[C@@H](C(O)(C)C)C)C	InChI=1S/C25H32O3/c1-14-17-10-13-25-18(15(2)22(26)21(25)16(3)23(4,5)27)11-12-24(25,6)19(17)8-9-20(14)28-7/h8-10,13,16,21,27H,11-12H2,1-7H3/t16-,21+,24+,25+/m0/s1	KEJYTPFHXXTRCU-HXGHLDGBSA-N	Organic compounds	Lipids and lipid-like molecules	Prenol lipids	Sesquiterpenoids
315	MSID000315	Agaritinal	CID_10244594	C12H15N3O4	O=Cc1ccc(cc1)NNC(=O)CCC(C(=O)O)N	InChI=1S/C12H15N3O4/c13-10(12(18)19)5-6-11(17)15-14-9-3-1-8(7-16)2-4-9/h1-4,7,10,14H,5-6,13H2,(H,15,17)(H,18,19)	OLPOUQMVOMXOGV-UHFFFAOYSA-N	Organic compounds	Organic acids and derivatives	Carboxylic acids and derivatives	Amino acids, peptides, and analogues
316	MSID000316	Agnosterol (lanosta-7,9(11),24-trien-3b-ol)	CID_21126062	C30H48O	CC(=CCC[C@H]([C@H]1CC[C@@]2([C@]1(C)CC=C1C2=CC[C@@H]2[C@]1(C)CC[C@@H](C2(C)C)O)C)C)C	InChI=1S/C30H48O/c1-20(2)10-9-11-21(3)22-14-18-30(8)24-12-13-25-27(4,5)26(31)16-17-28(25,6)23(24)15-19-29(22,30)7/h10,12,15,21-22,25-26,31H,9,11,13-14,16-19H2,1-8H3/t21-,22-,25+,26+,28-,29-,30+/m1/s1	ZBFPGLKEWSMWSG-BQNIITSRSA-N	Organic compounds	Lipids and lipid-like molecules	Prenol lipids	Triterpenoids
317	MSID000317	Agnosterone	CID_15894359	C30H46O	CC(=CCC[C@H]([C@H]1CC[C@@]2([C@]1(C)CC=C1C2=CC[C@@H]2[C@]1(C)CCC(=O)C2(C)C)C)C)C	InChI=1S/C30H46O/c1-20(2)10-9-11-21(3)22-14-18-30(8)24-12-13-25-27(4,5)26(31)16-17-28(25,6)23(24)15-19-29(22,30)7/h10,12,15,21-22,25H,9,11,13-14,16-19H2,1-8H3/t21-,22-,25+,28-,29-,30+/m1/s1	XKYJBQWATZUMSB-WUELKCQHSA-N	Organic compounds	Lipids and lipid-like molecules	Prenol lipids	Triterpenoids
318	MSID000318	Agrocybenine	CID_23278458	C12H18N2O	CC1=C2NC(CC2=NC(C1=O)(C)C)(C)C	InChI=1S/C12H18N2O/c1-7-9-8(6-11(2,3)14-9)13-12(4,5)10(7)15/h14H,6H2,1-5H3	OTBGQBSPIWKINO-UHFFFAOYSA-N	Organic compounds	Organoheterocyclic compounds	Pyrrolopyridines
319	MSID000319	Agrocybolacton	CID_10355437	C15H20O4	O[C@H]1CCC([C@H]2[C@@]31C(=O)O[C@@H]1[C@H]3C(=CC2)CO1)(C)C	InChI=1S/C15H20O4/c1-14(2)6-5-10(16)15-9(14)4-3-8-7-18-12(11(8)15)19-13(15)17/h3,9-12,16H,4-7H2,1-2H3/t9-,10-,11+,12+,15-/m0/s1	FUNRAISQDFOMFQ-RSPOJEKHSA-N	Organic compounds	Organoheterocyclic compounds	Furofurans
320	MSID000320	Albaconol	CID_5317148	C22H34O3	Cc1cc(O)c(c(c1)O)C[C@H]1[C@](C)(O)CC[C@@H]2[C@]1(C)CCCC2(C)C	InChI=1S/C22H34O3/c1-14-11-16(23)15(17(24)12-14)13-19-21(4)9-6-8-20(2,3)18(21)7-10-22(19,5)25/h11-12,18-19,23-25H,6-10,13H2,1-5H3/t18-,19+,21-,22+/m0/s1	APLGGFLATUGFCO-YUVXSKOASA-N	Organic compounds	Benzenoids	Phenols	Benzenediols
321	MSID000321	Albatrellin	CID_16119735	C44H56O6	C/C(=C\CC1=C(O)C(=C(C(=O)C1=O)C)c1oc(cc1CCC/C(=C/Cc1c(O)cc(cc1O)C)/C)C=C(C)C)/CC/C=C(/CCC=C(C)C)\C	InChI=1S/C44H56O6/c1-27(2)13-10-14-29(5)15-11-16-30(6)20-22-37-42(48)40(33(9)41(47)43(37)49)44-34(26-35(50-44)23-28(3)4)18-12-17-31(7)19-21-36-38(45)24-32(8)25-39(36)46/h13,15,19-20,23-26,45-46,48H,10-12,14,16-18,21-22H2,1-9H3/b29-15+,30-20+,31-19+	LCOOCCCTANLRMU-FGESODLRSA-N	Organic compounds	Lipids and lipid-like molecules	Prenol lipids	Diterpenoids
322	MSID000322	Alpha-barbatene	CID_14037349	C15H24	CC1=CC[C@@]2(C[C@H]1[C@]1(C)CCC[C@]21C)C	InChI=1S/C15H24/c1-11-6-9-13(2)10-12(11)14(3)7-5-8-15(13,14)4/h6,12H,5,7-10H2,1-4H3/t12-,13-,14+,15-/m1/s1	RMKQBFUAKZOVPQ-APIJFGDWSA-N	Organic compounds	Hydrocarbons	Unsaturated hydrocarbons	Branched unsaturated hydrocarbons
323	MSID000323	Alpha-copaene	CID_19725	C15H24	CC(C1CCC2(C3C1C2C(=CC3)C)C)C	InChI=1S/C15H24/c1-9(2)11-7-8-15(4)12-6-5-10(3)14(15)13(11)12/h5,9,11-14H,6-8H2,1-4H3	VLXDPFLIRFYIME-UHFFFAOYSA-N	Organic compounds	Lipids and lipid-like molecules	Prenol lipids	Sesquiterpenoids
324	MSID000324	Alpha-cuprenene	CID_5316205	C15H24	CC1=CC=C(CC1)[C@@]1(C)CCCC1(C)C	InChI=1S/C15H24/c1-12-6-8-13(9-7-12)15(4)11-5-10-14(15,2)3/h6,8H,5,7,9-11H2,1-4H3/t15-/m1/s1	DYQFFTPJVWEYMH-OAHLLOKOSA-N	Organic compounds	Lipids and lipid-like molecules	Prenol lipids	Sesquiterpenoids
325	MSID000325	Alpha-humulene	CID_5281520	C15H24	C/C/1=C\CC(C)(C)/C=C/C/C(=C/CC1)/C	InChI=1S/C15H24/c1-13-7-5-8-14(2)10-12-15(3,4)11-6-9-13/h6-7,10-11H,5,8-9,12H2,1-4H3/b11-6+,13-7+,14-10+	FAMPSKZZVDUYOS-HRGUGZIWSA-N	Organic compounds	Lipids and lipid-like molecules	Prenol lipids	Sesquiterpenoids
326	MSID000326	Alpha-muurolene	CID_12306047	C15H24	CC1=C[C@@H]2[C@H](CC1)C(=CC[C@H]2C(C)C)C	InChI=1S/C15H24/c1-10(2)13-8-6-12(4)14-7-5-11(3)9-15(13)14/h6,9-10,13-15H,5,7-8H2,1-4H3/t13-,14+,15-/m0/s1	QMAYBMKBYCGXDH-ZNMIVQPWSA-N	Organic compounds	Lipids and lipid-like molecules	Prenol lipids	Sesquiterpenoids
327	MSID000327	Anhydromarasmone	CID_11334451	C15H16O4	O=C1C=CC([C@H]2[C@@]31C(=O)O[C@@H]1[C@H]3C(=CC2)CO1)(C)C	InChI=1S/C15H16O4/c1-14(2)6-5-10(16)15-9(14)4-3-8-7-18-12(11(8)15)19-13(15)17/h3,5-6,9,11-12H,4,7H2,1-2H3/t9-,11+,12+,15-/m0/s1	CJZUKWREGMGONS-NFOTXUCKSA-N	Organic compounds	Organoheterocyclic compounds	Furofurans
328	MSID000328	Antcamphin A	CID_76321122	C24H36O5	OCC[C@H]([C@H]1CC[C@@H]2[C@]1(C)[C@@H](O)C(=O)C1=C2C(=O)C[C@@H]2[C@]1(C)CC[C@H]([C@H]2C)O)C	InChI=1S/C24H36O5/c1-12(8-10-25)14-5-6-15-19-18(27)11-16-13(2)17(26)7-9-23(16,3)20(19)21(28)22(29)24(14,15)4/h12-17,22,25-26,29H,5-11H2,1-4H3/t12-,13+,14-,15+,16+,17-,22+,23+,24-/m1/s1	XBVIDNCNJJHZCC-KJNNOELNSA-N	Organic compounds	Lipids and lipid-like molecules	Steroids and steroid derivatives	Bile acids, alcohols and derivatives
329	MSID000329	Antcamphin B	CID_73891057	C26H36O4	CC(=O)CC[C@H]([C@H]1CC[C@@H]2[C@]1(C)CC(=O)C1=C2C(=O)C[C@@H]2[C@]1(C)CCC(=O)[C@H]2C)C	InChI=1S/C26H36O4/c1-14(6-7-15(2)27)17-8-9-18-23-21(29)12-19-16(3)20(28)10-11-25(19,4)24(23)22(30)13-26(17,18)5/h14,16-19H,6-13H2,1-5H3/t14-,16+,17-,18+,19+,25+,26-/m1/s1	MRUYIXAKXOAVNW-XXTZWLNDSA-N	Organic compounds	Lipids and lipid-like molecules	Steroids and steroid derivatives	Bile acids, alcohols and derivatives
330	MSID000330	Antcamphin E	CID_76310174	C29H42O6	C[C@@H](C(=C)CC[C@H]([C@H]1CC[C@@H]2[C@]1(C)CC(=O)C1=C2[C@@H](O)C[C@@H]2[C@]1(C)CCC(=O)[C@]2(C)O)C)C(=O)O	InChI=1S/C29H42O6/c1-15(17(3)26(33)34)7-8-16(2)18-9-10-19-24-20(30)13-22-27(4,12-11-23(32)29(22,6)35)25(24)21(31)14-28(18,19)5/h16-20,22,30,35H,1,7-14H2,2-6H3,(H,33,34)/t16-,17+,18-,19+,20+,22-,27+,28-,29-/m1/s1	UPCGWWQEYSWYOT-GGOZJRRVSA-N	Organic compounds	Lipids and lipid-like molecules	Steroids and steroid derivatives	Bile acids, alcohols and derivatives
331	MSID000331	Antcamphin F	CID_76328318	C29H42O6	C[C@H](C(=C)CC[C@H]([C@H]1CC[C@@H]2[C@]1(C)CC(=O)C1=C2[C@@H](O)C[C@@H]2[C@]1(C)CCC(=O)[C@]2(C)O)C)C(=O)O	InChI=1S/C29H42O6/c1-15(17(3)26(33)34)7-8-16(2)18-9-10-19-24-20(30)13-22-27(4,12-11-23(32)29(22,6)35)25(24)21(31)14-28(18,19)5/h16-20,22,30,35H,1,7-14H2,2-6H3,(H,33,34)/t16-,17-,18-,19+,20+,22-,27+,28-,29-/m1/s1	UPCGWWQEYSWYOT-MTBMFYBCSA-N	Organic compounds	Lipids and lipid-like molecules	Steroids and steroid derivatives	Bile acids, alcohols and derivatives
332	MSID000332	Antcamphin I	CID_44424393	C29H40O5	C[C@@H](C(=C)CC[C@H]([C@H]1CC[C@@H]2[C@]1(C)CC(=O)C1=C2C(=O)C[C@@H]2[C@]1(C)CCC(=O)[C@H]2C)C)C(=O)O	InChI=1S/C29H40O5/c1-15(17(3)27(33)34)7-8-16(2)19-9-10-20-25-23(31)13-21-18(4)22(30)11-12-28(21,5)26(25)24(32)14-29(19,20)6/h16-21H,1,7-14H2,2-6H3,(H,33,34)/t16-,17+,18+,19-,20+,21+,28+,29-/m1/s1	DVORYMAGXQGBQK-HPRYJKPLSA-N	Organic compounds	Lipids and lipid-like molecules	Steroids and steroid derivatives	Ergostane steroids
333	MSID000333	Antcamphin J	CID_68150386	C29H40O5	C[C@H](C(=C)CC[C@H]([C@H]1CC[C@@H]2[C@]1(C)CC(=O)C1=C2C(=O)C[C@@H]2[C@]1(C)CCC(=O)[C@H]2C)C)C(=O)O	InChI=1S/C29H40O5/c1-15(17(3)27(33)34)7-8-16(2)19-9-10-20-25-23(31)13-21-18(4)22(30)11-12-28(21,5)26(25)24(32)14-29(19,20)6/h16-21H,1,7-14H2,2-6H3,(H,33,34)/t16-,17-,18+,19-,20+,21+,28+,29-/m1/s1	DVORYMAGXQGBQK-IXXHGVNUSA-N	Organic compounds	Lipids and lipid-like molecules	Steroids and steroid derivatives	Ergostane steroids
334	MSID000334	Antcin B	CID_387397	C29H40O5	CC(C(=C)CCC(C1CCC2C1(C)CC(=O)C1=C2C(=O)CC2C1(C)CCC(=O)[C@H]2C)C)C(=O)O	InChI=1S/C29H40O5/c1-15(17(3)27(33)34)7-8-16(2)19-9-10-20-25-23(31)13-21-18(4)22(30)11-12-28(21,5)26(25)24(32)14-29(19,20)6/h16-21H,1,7-14H2,2-6H3,(H,33,34)/t16?,17?,18-,19?,20?,21?,28?,29?/m0/s1	DVORYMAGXQGBQK-BQPMOXFZSA-N	Organic compounds	Lipids and lipid-like molecules	Steroids and steroid derivatives	Ergostane steroids
335	MSID000335	Zhankuic acid A	CID_10004842	C29H40O5	CC(C(=C)CC[C@H]([C@H]1CC[C@@H]2[C@]1(C)CC(=O)C1=C2C(=O)C[C@@H]2[C@]1(C)CCC(=O)[C@H]2C)C)C(=O)O	InChI=1S/C29H40O5/c1-15(17(3)27(33)34)7-8-16(2)19-9-10-20-25-23(31)13-21-18(4)22(30)11-12-28(21,5)26(25)24(32)14-29(19,20)6/h16-21H,1,7-14H2,2-6H3,(H,33,34)/t16-,17?,18+,19-,20+,21+,28+,29-/m1/s1	DVORYMAGXQGBQK-QCMFUGJUSA-N	Organic compounds	Lipids and lipid-like molecules	Steroids and steroid derivatives	Ergostane steroids
336	MSID000336	Antcamphin K	CID_76317400	C29H44O5	C[C@@H](C(=C)CC[C@H]([C@H]1CC[C@@H]2[C@]1(C)CC(=O)C1=C2[C@@H](O)C[C@@H]2[C@]1(C)CC[C@@H]([C@H]2C)O)C)C(=O)O	InChI=1S/C29H44O5/c1-15(17(3)27(33)34)7-8-16(2)19-9-10-20-25-23(31)13-21-18(4)22(30)11-12-28(21,5)26(25)24(32)14-29(19,20)6/h16-23,30-31H,1,7-14H2,2-6H3,(H,33,34)/t16-,17+,18+,19-,20+,21+,22+,23+,28+,29-/m1/s1	GVRZLCAYCZTYBS-CRZBWDKISA-N	Organic compounds	Lipids and lipid-like molecules	Steroids and steroid derivatives	Bile acids, alcohols and derivatives
337	MSID000337	Antcamphin L	CID_76324776	C29H44O5	C[C@H](C(=C)CC[C@H]([C@H]1CC[C@@H]2[C@]1(C)CC(=O)C1=C2[C@@H](O)C[C@@H]2[C@]1(C)CC[C@@H]([C@H]2C)O)C)C(=O)O	InChI=1S/C29H44O5/c1-15(17(3)27(33)34)7-8-16(2)19-9-10-20-25-23(31)13-21-18(4)22(30)11-12-28(21,5)26(25)24(32)14-29(19,20)6/h16-23,30-31H,1,7-14H2,2-6H3,(H,33,34)/t16-,17-,18+,19-,20+,21+,22+,23+,28+,29-/m1/s1	GVRZLCAYCZTYBS-IZYGUECGSA-N	Organic compounds	Lipids and lipid-like molecules	Steroids and steroid derivatives	Bile acids, alcohols and derivatives
338	MSID000338	Camphoratin B	CID_50900754	C29H44O5	CC(C(=C)CC[C@H]([C@H]1CC[C@@H]2[C@]1(C)CC(=O)C1=C2[C@@H](O)C[C@@H]2[C@]1(C)CC[C@H]([C@H]2C)O)C)C(=O)O	InChI=1S/C29H44O5/c1-15(17(3)27(33)34)7-8-16(2)19-9-10-20-25-23(31)13-21-18(4)22(30)11-12-28(21,5)26(25)24(32)14-29(19,20)6/h16-23,30-31H,1,7-14H2,2-6H3,(H,33,34)/t16-,17?,18+,19-,20+,21+,22-,23+,28+,29-/m1/s1	GVRZLCAYCZTYBS-MMJUFICTSA-N	Organic compounds	Lipids and lipid-like molecules	Steroids and steroid derivatives	Bile acids, alcohols and derivatives
339	MSID000339	Antcin D	CID_15786229	C29H40O6	C=C(C(C(=O)O)C)CC[C@H]([C@H]1CC[C@@]2([C@]1(C)CC(=O)C1=C2C(=O)CC2[C@]1(C)CCC(=O)[C@H]2C)O)C	InChI=1S/C29H40O6/c1-15(17(3)26(33)34)7-8-16(2)19-9-12-29(35)25-22(31)13-20-18(4)21(30)10-11-27(20,5)24(25)23(32)14-28(19,29)6/h16-20,35H,1,7-14H2,2-6H3,(H,33,34)/t16-,17?,18+,19-,20?,27+,28-,29-/m1/s1	ZEXGDMONMBETSX-KFMVYKGZSA-N	Organic compounds	Lipids and lipid-like molecules	Steroids and steroid derivatives	Bile acids, alcohols and derivatives
340	MSID000340	Antcin E	CID_15786231	C29H40O4	C=C(C(C(=O)O)C)CC[C@H]([C@H]1CC=C2[C@]1(C)CC(=O)C1=C2CCC2[C@]1(C)CCC(=O)[C@H]2C)C	InChI=1S/C29H40O4/c1-16(18(3)27(32)33)7-8-17(2)21-11-12-23-20-9-10-22-19(4)24(30)13-14-28(22,5)26(20)25(31)15-29(21,23)6/h12,17-19,21-22H,1,7-11,13-15H2,2-6H3,(H,32,33)/t17-,18?,19+,21-,22?,28+,29-/m1/s1	PMHCHLYGCHPBEC-CYFVRWTGSA-N	Organic compounds	Lipids and lipid-like molecules	Steroids and steroid derivatives	Ergostane steroids
341	MSID000341	Antcin F	CID_15786230	C29H40O5	C=C(C(C(=O)O)C)CC[C@H]([C@H]1CC=C2[C@]1(C)CC(=O)C1=C2[C@@H](O)CC2[C@]1(C)CCC(=O)[C@H]2C)C	InChI=1S/C29H40O5/c1-15(17(3)27(33)34)7-8-16(2)19-9-10-20-25-23(31)13-21-18(4)22(30)11-12-28(21,5)26(25)24(32)14-29(19,20)6/h10,16-19,21,23,31H,1,7-9,11-14H2,2-6H3,(H,33,34)/t16-,17?,18+,19-,21?,23+,28+,29-/m1/s1	ZPSJWLSADLCKBZ-GIMPTUAXSA-N	Organic compounds	Lipids and lipid-like molecules	Steroids and steroid derivatives	Bile acids, alcohols and derivatives
342	MSID000342	Antcin H	CID_53318662,CID_68150384	C29H42O6	C[C@@H](C(=C)CC[C@H]([C@H]1CC[C@@H]2[C@]1(C)[C@@H](O)C(=O)C1=C2C(=O)C[C@@H]2[C@]1(C)CC[C@H]([C@H]2C)O)C)C(=O)O	InChI=1S/C29H42O6/c1-14(16(3)27(34)35)7-8-15(2)18-9-10-19-23-22(31)13-20-17(4)21(30)11-12-28(20,5)24(23)25(32)26(33)29(18,19)6/h15-21,26,30,33H,1,7-13H2,2-6H3,(H,34,35)/t15-,16+,17+,18-,19+,20+,21-,26+,28+,29-/m1/s1	LVFHKUZOQUATIE-KEBSMKNNSA-N	Organic compounds	Lipids and lipid-like molecules	Steroids and steroid derivatives	Bile acids, alcohols and derivatives
343	MSID000343	Antcin I	CID_53323940	C29H42O5	CC(C(=C)CC[C@H]([C@H]1CC[C@@H]2[C@]1(C)CC(=O)C1=C2C(=O)C[C@@H]2[C@]1(C)CC[C@H]([C@H]2C)O)C)C(=O)O	InChI=1S/C29H42O5/c1-15(17(3)27(33)34)7-8-16(2)19-9-10-20-25-23(31)13-21-18(4)22(30)11-12-28(21,5)26(25)24(32)14-29(19,20)6/h16-22,30H,1,7-14H2,2-6H3,(H,33,34)/t16-,17?,18+,19-,20+,21+,22-,28+,29-/m1/s1	TXEJUZMIQVTZHO-JNXQNPAGSA-N	Organic compounds	Lipids and lipid-like molecules	Steroids and steroid derivatives	Bile acids, alcohols and derivatives
344	MSID000344	Antrocamol LT2	CID_139583218	C26H40O6	COC1=C(OC)C(=O)C(C(C1OC(=O)C)CC=C(CCC=C(CC(C=C(C)C)O)C)C)C	InChI=1S/C26H40O6/c1-16(2)14-21(28)15-18(4)11-9-10-17(3)12-13-22-19(5)23(29)25(30-7)26(31-8)24(22)32-20(6)27/h11-12,14,19,21-22,24,28H,9-10,13,15H2,1-8H3	FDCVVSTXMYZRHU-UHFFFAOYSA-N	Organic compounds	Lipids and lipid-like molecules	Prenol lipids	Diterpenoids
345	MSID000345	Antrocamol LT3	CID_86278930	C24H38O5	COC1=C(OC)C(=O)[C@@H]([C@H]([C@H]1O)C/C=C(/CC/C=C(/C/C=C/C(O)(C)C)\C)\C)C	InChI=1S/C24H38O5/c1-16(12-9-15-24(4,5)27)10-8-11-17(2)13-14-19-18(3)20(25)22(28-6)23(29-7)21(19)26/h9-10,13,15,18-19,21,26-27H,8,11-12,14H2,1-7H3/b15-9+,16-10+,17-13+/t18-,19-,21-/m1/s1	LUSZELLFBWUVBI-IWBJKXSYSA-N	Organic compounds	Lipids and lipid-like molecules	Prenol lipids	Diterpenoids
346	MSID000346	Antrocamphin A	CID_16737471	C15H18O3	COc1cc(OC)c(c(c1C#CC(=C)C)C)OC	InChI=1S/C15H18O3/c1-10(2)7-8-12-11(3)15(18-6)14(17-5)9-13(12)16-4/h9H,1H2,2-6H3	CPPLWBNAWKMJON-UHFFFAOYSA-N	Organic compounds	Benzenoids	Phenol ethers	Anisoles
347	MSID000347	Antrocamphin B	CID_16737473	C14H16O4	COc1cc(OC)c(c(c1C#CC(=O)C)C)OC	InChI=1S/C14H16O4/c1-9(15)6-7-11-10(2)14(18-5)13(17-4)8-12(11)16-3/h8H,1-5H3	IKGSJDIGQRJKDN-UHFFFAOYSA-N	Organic compounds	Benzenoids	Phenol ethers	Anisoles
348	MSID000348	Antrocin	CID_53474706	C15H22O2	C=C1CCC2C3(C1COC3=O)CCCC2(C)C	InChI=1S/C15H22O2/c1-10-5-6-12-14(2,3)7-4-8-15(12)11(10)9-17-13(15)16/h11-12H,1,4-9H2,2-3H3	SDYJYMBMSYYZIC-UHFFFAOYSA-N	Organic compounds	Organoheterocyclic compounds	Naphthofurans
349	MSID000349	Antrocinnamomin A	CID_24970517	C21H25NO5	CC(=CCOc1ccc(cc1)C1=C(CC(C)C)C(=O)N(C1=O)OC(=O)C)C	InChI=1S/C21H25NO5/c1-13(2)10-11-26-17-8-6-16(7-9-17)19-18(12-14(3)4)20(24)22(21(19)25)27-15(5)23/h6-10,14H,11-12H2,1-5H3	UZWGAKUWSJOJSJ-UHFFFAOYSA-N	Organic compounds	Benzenoids	Phenol ethers
350	MSID000350	Antrocinnamomin B	CID_24970582	C14H15NO4	CC(CC1=C(c2ccc(cc2)O)C(=O)N(C1=O)O)C	InChI=1S/C14H15NO4/c1-8(2)7-11-12(14(18)15(19)13(11)17)9-3-5-10(16)6-4-9/h3-6,8,16,19H,7H2,1-2H3	OVZPMQOYHUYDEQ-UHFFFAOYSA-N	Organic compounds	Benzenoids	Phenols	1-hydroxy-2-unsubstituted benzenoids
351	MSID000351	Antrocinnamomin C	CID_44561456	C14H14O4	CC(CC1=C(C(=O)OC1=O)c1ccc(cc1)O)C	InChI=1S/C14H14O4/c1-8(2)7-11-12(14(17)18-13(11)16)9-3-5-10(15)6-4-9/h3-6,8,15H,7H2,1-2H3	FJGYSGJBIYTUFG-UHFFFAOYSA-N	Organic compounds	Benzenoids	Phenols	1-hydroxy-2-unsubstituted benzenoids
352	MSID000352	Antrocinnamomin D	CID_24970583	C19H24O4	CC(=CCOc1ccc(cc1)C1=C(CC(C)C)C(OC1=O)O)C	InChI=1S/C19H24O4/c1-12(2)9-10-22-15-7-5-14(6-8-15)17-16(11-13(3)4)18(20)23-19(17)21/h5-9,13,18,20H,10-11H2,1-4H3	WALOFELUZXOXIJ-UHFFFAOYSA-N	Organic compounds	Benzenoids	Phenol ethers
353	MSID000353	Antrodioxolanone	CID_16737472	C29H32O9	COc1cc(OC)c(c(c1C#C[C@]1(C)OC(=O)O[C@]1(C)C#Cc1c(OC)cc(c(c1C)OC)OC)C)OC	InChI=1S/C29H32O9/c1-17-19(21(31-5)15-23(33-7)25(17)35-9)11-13-28(3)29(4,38-27(30)37-28)14-12-20-18(2)26(36-10)24(34-8)16-22(20)32-6/h15-16H,1-10H3/t28-,29+	NJECTZSLZHQUFD-ISILISOKSA-N	Organic compounds	Benzenoids	Phenol ethers	Anisoles
354	MSID000354	Antroquinonol	CID_24875259	C24H38O4	COC1=C(OC)C(=O)[C@@H]([C@H]([C@H]1O)C/C=C(/CC/C=C(/CCC=C(C)C)\C)\C)C	InChI=1S/C24H38O4/c1-16(2)10-8-11-17(3)12-9-13-18(4)14-15-20-19(5)21(25)23(27-6)24(28-7)22(20)26/h10,12,14,19-20,22,26H,8-9,11,13,15H2,1-7H3/b17-12+,18-14+/t19-,20-,22-/m1/s1	LJTSIMVOOOLKOL-FNRDIUJOSA-N	Organic compounds	Lipids and lipid-like molecules	Prenol lipids	Diterpenoids
355	MSID000355	Antroquinonol B	CID_132516015	C24H36O6	COC1=C(OC)C(=O)[C@@H]([C@H]([C@H]1O)C/C=C(/CC/C=C(/CC1OC(=O)[C@H](C1)C)\C)\C)C	InChI=1S/C24H36O6/c1-14(8-7-9-15(2)12-18-13-16(3)24(27)30-18)10-11-19-17(4)20(25)22(28-5)23(29-6)21(19)26/h9-10,16-19,21,26H,7-8,11-13H2,1-6H3/b14-10+,15-9+/t16-,17+,18?,19+,21+/m0/s1	DBMARRQLSJJYJE-JJLRARDYSA-N	Organic compounds	Lipids and lipid-like molecules	Prenol lipids	Terpene lactones
356	MSID000356	Antroquinonol C	CID_132516016	C25H40O5	COC1=C(OC)[C@@H]([C@@H]([C@H](C1=O)C)C/C=C(/CC/C=C(/C/C=C/C(OC)(C)C)\C)\C)O	InChI=1S/C25H40O5/c1-17(13-10-16-25(4,5)30-8)11-9-12-18(2)14-15-20-19(3)21(26)23(28-6)24(29-7)22(20)27/h10-11,14,16,19-20,22,27H,9,12-13,15H2,1-8H3/b16-10+,17-11+,18-14+/t19-,20-,22-/m1/s1	KHLSTGAGUBFXRF-YBDUBVPMSA-N	Organic compounds	Lipids and lipid-like molecules	Prenol lipids	Diterpenoids
357	MSID000357	Antroquinonol N	CID_139589775	C24H34O5	COC1=C(OC)C(=O)C(=C(C1=O)C/C=C(/CC/C=C(/C[C@@H](C=C(C)C)O)\C)\C)C	InChI=1S/C24H34O5/c1-15(2)13-19(25)14-17(4)10-8-9-16(3)11-12-20-18(5)21(26)23(28-6)24(29-7)22(20)27/h10-11,13,19,25H,8-9,12,14H2,1-7H3/b16-11+,17-10+/t19-/m1/s1	FGNQCSVHEUANOF-UGPPNHOWSA-N	Organic compounds	Lipids and lipid-like molecules	Prenol lipids	Quinone and hydroquinone lipids
358	MSID000358	Antroquinonol O	CID_139589776	C23H36O5	OCC(=C[C@H](CC(=CCCC(=CC[C@H]1[C@@H](O)C=C(C(=O)[C@@H]1C)OC)C)C)O)C	InChI=1S/C23H36O5/c1-15(7-6-8-16(2)11-19(25)12-17(3)14-24)9-10-20-18(4)23(27)22(28-5)13-21(20)26/h8-9,12-13,18-21,24-26H,6-7,10-11,14H2,1-5H3/t18-,19+,20-,21+/m1/s1	BISKIPFYEROROF-MHTWAQMVSA-N	Organic compounds	Lipids and lipid-like molecules	Prenol lipids	Diterpenoids
359	MSID000359	Antroquinonol P	CID_139589777	C24H38O6	OCC(=C[C@H](CC(=CCCC(=CC[C@@H]1[C@@H](C)C(=O)C(=C([C@@H]1O)OC)OC)C)C)O)C	InChI=1S/C24H38O6/c1-15(8-7-9-16(2)12-19(26)13-17(3)14-25)10-11-20-18(4)21(27)23(29-5)24(30-6)22(20)28/h9-10,13,18-20,22,25-26,28H,7-8,11-12,14H2,1-6H3/t18-,19+,20-,22-/m1/s1	CDFHJGSGTIXSQV-XAPVIXHLSA-N	Organic compounds	Lipids and lipid-like molecules	Prenol lipids	Diterpenoids
360	MSID000360	Antroquinonol Q	CID_139589778	C26H40O7	OCC(=C[C@H](CC(=CCCC(=CC[C@@H]1[C@@H](C)C(=O)C(=C([C@@H]1OC(=O)C)OC)OC)C)C)O)C	InChI=1S/C26H40O7/c1-16(9-8-10-17(2)13-21(29)14-18(3)15-27)11-12-22-19(4)23(30)25(31-6)26(32-7)24(22)33-20(5)28/h10-11,14,19,21-22,24,27,29H,8-9,12-13,15H2,1-7H3/t19-,21+,22-,24-/m1/s1	MQJJTTDUYLCOJW-NQRVTCLYSA-N	Organic compounds	Lipids and lipid-like molecules	Prenol lipids	Diterpenoids
361	MSID000361	Antroquinonol R	CID_139589779	C23H36O6	OCC(=C[C@H](CC(=CCCC(=CC[C@@H]1[C@@H](C)C(=C(C(=O)[C@@H]1O)OC)O)C)C)O)C	InChI=1S/C23H36O6/c1-14(7-6-8-15(2)11-18(25)12-16(3)13-24)9-10-19-17(4)20(26)23(29-5)22(28)21(19)27/h8-9,12,17-19,21,24-27H,6-7,10-11,13H2,1-5H3/t17-,18+,19-,21-/m1/s1	YGOVUEFRDLADKX-RCLSDMTESA-N	Organic compounds	Lipids and lipid-like molecules	Prenol lipids	Diterpenoids
362	MSID000362	Antroquinonol S	CID_139589780	C23H34O5	COC1=C[C@H](O)[C@@H]([C@H](C1=O)C)C/C=C(/CC/C=C(/C[C@H]1OC(=O)[C@@H](C1)C)\C)\C	InChI=1S/C23H34O5/c1-14(7-6-8-15(2)11-18-12-16(3)23(26)28-18)9-10-19-17(4)22(25)21(27-5)13-20(19)24/h8-9,13,16-20,24H,6-7,10-12H2,1-5H3/b14-9+,15-8+/t16-,17-,18-,19-,20+/m1/s1	FHZXTBYGLVPEAT-VAXJKGLHSA-N	Organic compounds	Lipids and lipid-like molecules	Prenol lipids	Terpene lactones
363	MSID000363	Antroquinonol T	CID_139589781	C26H42O8	COC1=C(OC)C(=O)[C@@H]([C@H]([C@H]1OC(=O)C)CC=C(CCC=C(C[C@@H](C[C@H](C(O)O)C)O)C)C)C	InChI=1S/C26H42O8/c1-15(9-8-10-16(2)13-20(28)14-17(3)26(30)31)11-12-21-18(4)22(29)24(32-6)25(33-7)23(21)34-19(5)27/h10-11,17-18,20-21,23,26,28,30-31H,8-9,12-14H2,1-7H3/t17-,18-,20+,21-,23-/m1/s1	RMUGCYNOXFBOIJ-GYXSNACCSA-N	Organic compounds	Lipids and lipid-like molecules	Prenol lipids	Diterpenoids
364	MSID000364	Antroquinonol U	CID_139589784	C26H38O8	COC1=C(OC)[C@@H]([C@@H]([C@H](C1=O)C)CC=C(CCC=C(C[C@@H](C=C(C(=O)O)C)O)C)C)OC(=O)C	InChI=1S/C26H38O8/c1-15(9-8-10-16(2)13-20(28)14-17(3)26(30)31)11-12-21-18(4)22(29)24(32-6)25(33-7)23(21)34-19(5)27/h10-11,14,18,20-21,23,28H,8-9,12-13H2,1-7H3,(H,30,31)/t18-,20+,21-,23-/m1/s1	NWDZWEAPEOCWDK-ZVXPMLRVSA-N	Organic compounds	Lipids and lipid-like molecules	Prenol lipids	Diterpenoids
365	MSID000365	Antroquinonol V	CID_139589774	C24H38O5	OCC(=CCCC(=CCCC(=CC[C@@H]1[C@@H](C)C(=O)C(=C([C@@H]1O)OC)OC)C)C)C	InChI=1S/C24H38O5/c1-16(10-8-12-18(3)15-25)9-7-11-17(2)13-14-20-19(4)21(26)23(28-5)24(29-6)22(20)27/h9,12-13,19-20,22,25,27H,7-8,10-11,14-15H2,1-6H3/t19-,20-,22-/m1/s1	NCOKWRIBBVIWNF-KCZVDYSFSA-N	Organic compounds	Lipids and lipid-like molecules	Prenol lipids	Diterpenoids
366	MSID000366	Antroquinonol W	CID_139589782	C24H40O5	OCC(CCCC(=CCCC(=CC[C@@H]1[C@@H](C)C(=O)C(=C([C@@H]1O)OC)OC)C)C)C	InChI=1S/C24H40O5/c1-16(10-8-12-18(3)15-25)9-7-11-17(2)13-14-20-19(4)21(26)23(28-5)24(29-6)22(20)27/h9,13,18-20,22,25,27H,7-8,10-12,14-15H2,1-6H3/t18?,19-,20-,22-/m1/s1	ZUKZELAIKKOIBV-SRNQMFCMSA-N	Organic compounds	Lipids and lipid-like molecules	Prenol lipids	Diterpenoids
367	MSID000367	Antroquinonol X	CID_139589783	C23H32O3	COc1cc2O[C@@](C)(CCC=C(CCC=C(C)C)C)C=Cc2c(c1O)C	InChI=1S/C23H32O3/c1-16(2)9-7-10-17(3)11-8-13-23(5)14-12-19-18(4)22(24)21(25-6)15-20(19)26-23/h9,11-12,14-15,24H,7-8,10,13H2,1-6H3/t23-/m0/s1	AGUVEQLHXOYHEK-QHCPKHFHSA-N	Organic compounds	Lipids and lipid-like molecules	Prenol lipids	Monoterpenoids
368	MSID000368	Applamatine B	CID_46918392	C17H26O3	COCCc1c(C)cc2c(c1C)C[C@@]([C@@H]2OC)(C)CO	InChI=1S/C17H26O3/c1-11-8-14-15(12(2)13(11)6-7-19-4)9-17(3,10-18)16(14)20-5/h8,16,18H,6-7,9-10H2,1-5H3/t16-,17+/m1/s1	SLJLUCPQAQEAOL-SJORKVTESA-N	Organic compounds	Benzenoids	Indanes
369	MSID000369	Applanatine A	CID_46918391	C17H26O3	COCCc1c(C)cc2c(c1C)C[C@@]([C@H]2OC)(C)CO	InChI=1S/C17H26O3/c1-11-8-14-15(12(2)13(11)6-7-19-4)9-17(3,10-18)16(14)20-5/h8,16,18H,6-7,9-10H2,1-5H3/t16-,17-/m0/s1	SLJLUCPQAQEAOL-IRXDYDNUSA-N	Organic compounds	Benzenoids	Indanes
370	MSID000370	Applanatin A	CID_101447370	C16H16O6	OCC(=C)[C@H]1CC[C@H]2[C@@](C1=O)(O)Oc1c(C2=O)cc(cc1)O	InChI=1S/C16H16O6/c1-8(7-17)10-3-4-12-14(19)11-6-9(18)2-5-13(11)22-16(12,21)15(10)20/h2,5-6,10,12,17-18,21H,1,3-4,7H2/t10-,12-,16-/m1/s1	HLIPHTRQCSGMCK-NSODJVPESA-N	Organic compounds	Organoheterocyclic compounds	Benzopyrans	1-benzopyrans
371	MSID000371	Applanatin B	CID_101447371	C16H18O6	OCC([C@H]1CC[C@H]2[C@@](C1=O)(O)Oc1c(C2=O)cc(cc1)O)C	InChI=1S/C16H18O6/c1-8(7-17)10-3-4-12-14(19)11-6-9(18)2-5-13(11)22-16(12,21)15(10)20/h2,5-6,8,10,12,17-18,21H,3-4,7H2,1H3/t8?,10-,12-,16-/m1/s1	YNHPWMXJGUOPOK-NOXQYYELSA-N	Organic compounds	Organoheterocyclic compounds	Benzopyrans	1-benzopyrans
372	MSID000372	Applanatine C	CID_46918393	C17H26O3	COCCc1c(CO)cc2c(c1C)CC(C2OC)(C)C	InChI=1S/C17H26O3/c1-11-13(6-7-19-4)12(10-18)8-14-15(11)9-17(2,3)16(14)20-5/h8,16,18H,6-7,9-10H2,1-5H3	HKDHXZLREQAIPY-UHFFFAOYSA-N	Organic compounds	Benzenoids	Indanes
373	MSID000373	Applanatine D	CID_139585785	C18H22O4	O=C1OCCc2c1cc1c(c2C)C[C@@]2([C@H]1OC(C)(C)OC2)C	InChI=1S/C18H22O4/c1-10-11-5-6-20-16(19)13(11)7-12-14(10)8-18(4)9-21-17(2,3)22-15(12)18/h7,15H,5-6,8-9H2,1-4H3/t15-,18-/m0/s1	RLJNNMVBYZTJLR-YJBOKZPZSA-N	Organic compounds	Organoheterocyclic compounds	Benzopyrans	2-benzopyrans
374	MSID000374	Applanatine E	CID_139586624	C15H18O4	OC[C@]1(C)Cc2c([C@@H]1O)cc1c(c2C)CCOC1=O	InChI=1S/C15H18O4/c1-8-9-3-4-19-14(18)11(9)5-10-12(8)6-15(2,7-16)13(10)17/h5,13,16-17H,3-4,6-7H2,1-2H3/t13-,15-/m0/s1	WCVRZUHPBSKVLX-ZFWWWQNUSA-N	Organic compounds	Organoheterocyclic compounds	Benzopyrans	2-benzopyrans
375	MSID000375	Applanatumin A	CID_139586449	C32H30O12	O=CC1=CC2CC(C(C(C1)(C2)C1CCC(C21Oc1c(C2=O)cc(cc1)O)C(=O)O)O)(CC(=O)c1cc(O)ccc1O)C(=O)O	InChI=1S/C32H30O12/c33-14-16-7-15-10-30(12-16,28(41)31(11-15,29(42)43)13-23(37)19-8-17(34)1-4-22(19)36)25-6-3-21(27(39)40)32(25)26(38)20-9-18(35)2-5-24(20)44-32/h1-2,4-5,7-9,14-15,21,25,28,34-36,41H,3,6,10-13H2,(H,39,40)(H,42,43)	FJKXTYHCAANBDR-UHFFFAOYSA-N	Organic compounds	Organic oxygen compounds	Organooxygen compounds	Carbonyl compounds
376	MSID000376	Applanatumol J	CID_132542819	C15H15ClO6	Oc1ccc(c(c1)C(=O)C[C@]12CC[C@@H]([C@]2(Cl)COC1=O)O)O	InChI=1S/C15H15ClO6/c16-15-7-22-13(21)14(15,4-3-12(15)20)6-11(19)9-5-8(17)1-2-10(9)18/h1-2,5,12,17-18,20H,3-4,6-7H2/t12-,14+,15+/m0/s1	TXJDUJRYAVNVFX-NWANDNLSSA-N	Organic compounds	Organic oxygen compounds	Organooxygen compounds	Carbonyl compounds
377	MSID000377	Applanatumol T	CID_139584073	C16H18O7	OC(=O)[C@@H](CC(=O)c1cc(O)ccc1O)CC/C=C(/C(=O)O)\C	InChI=1S/C16H18O7/c1-9(15(20)21)3-2-4-10(16(22)23)7-14(19)12-8-11(17)5-6-13(12)18/h3,5-6,8,10,17-18H,2,4,7H2,1H3,(H,20,21)(H,22,23)/b9-3+/t10-/m1/s1	AXGVFLQALSABLQ-OTVCUZDGSA-N	Organic compounds	Organic oxygen compounds	Organooxygen compounds	Carbonyl compounds
378	MSID000378	Applanatumol Z1	CID_139584704	C13H12O5	COC(=O)CCc1cc(=O)c2c(o1)ccc(c2)O	InChI=1S/C13H12O5/c1-17-13(16)5-3-9-7-11(15)10-6-8(14)2-4-12(10)18-9/h2,4,6-7,14H,3,5H2,1H3	LAUXPHGTNJTILD-UHFFFAOYSA-N	Organic compounds	Organoheterocyclic compounds	Benzopyrans	1-benzopyrans
379	MSID000379	Applanoxidic acid A	CID_11756156	C30H40O7	O=C(CC(C(=O)O)C)/C=C(/[C@H]1C[C@@H]([C@@]2([C@]1(C)C(=O)C=C1[C@]32O[C@@H]3C[C@@H]2[C@]1(C)CCC(=O)C2(C)C)C)O)\C	InChI=1S/C30H40O7/c1-15(10-17(31)11-16(2)25(35)36)18-12-23(34)29(7)28(18,6)22(33)13-20-27(5)9-8-21(32)26(3,4)19(27)14-24-30(20,29)37-24/h10,13,16,18-19,23-24,34H,8-9,11-12,14H2,1-7H3,(H,35,36)/b15-10+/t16?,18-,19+,23+,24-,27+,28+,29-,30+/m1/s1	FGUBEKCWBCCEIB-NDKBUZNXSA-N	Organic compounds	Lipids and lipid-like molecules	Prenol lipids	Triterpenoids
380	MSID000380	Applanoxidic acid E	CID_10324125	C30H40O7	O=C(CC(C(=O)O)C)/C=C(/[C@H]1C[C@H]([C@@]2([C@]1(C)C(=O)C=C1[C@]32O[C@@H]3C[C@@H]2[C@]1(C)CCC(=O)C2(C)C)C)O)\C	InChI=1S/C30H40O7/c1-15(10-17(31)11-16(2)25(35)36)18-12-23(34)29(7)28(18,6)22(33)13-20-27(5)9-8-21(32)26(3,4)19(27)14-24-30(20,29)37-24/h10,13,16,18-19,23-24,34H,8-9,11-12,14H2,1-7H3,(H,35,36)/b15-10+/t16?,18-,19+,23-,24-,27+,28+,29-,30+/m1/s1	FGUBEKCWBCCEIB-BIOTWYLMSA-N	Organic compounds	Lipids and lipid-like molecules	Prenol lipids	Triterpenoids
381	MSID000381	Gibbosic acid N	CID_145721191	C30H40O7	O=C(C[C@@H](C(=O)O)C)/C=C(/[C@H]1C[C@@H]([C@@]2([C@]1(C)C(=O)C=C1[C@@]32O[C@H]3C[C@@H]2[C@]1(C)CCC(=O)C2(C)C)C)O)\C	InChI=1S/C30H40O7/c1-15(10-17(31)11-16(2)25(35)36)18-12-23(34)29(7)28(18,6)22(33)13-20-27(5)9-8-21(32)26(3,4)19(27)14-24-30(20,29)37-24/h10,13,16,18-19,23-24,34H,8-9,11-12,14H2,1-7H3,(H,35,36)/b15-10+/t16-,18+,19-,23-,24-,27-,28-,29+,30+/m0/s1	FGUBEKCWBCCEIB-CHJLPVETSA-N	Organic compounds	Lipids and lipid-like molecules	Prenol lipids	Triterpenoids
382	MSID000382	Applanoxidic acid F	CID_9983822	C30H38O7	O=C(/C=C(/[C@H]1CC(=O)[C@@]2([C@]1(C)C(=O)C=C1[C@]32O[C@@H]3C[C@@H]2[C@]1(C)CCC(=O)C2(C)C)C)\C)CC(C(=O)O)C	InChI=1S/C30H38O7/c1-15(10-17(31)11-16(2)25(35)36)18-12-23(34)29(7)28(18,6)22(33)13-20-27(5)9-8-21(32)26(3,4)19(27)14-24-30(20,29)37-24/h10,13,16,18-19,24H,8-9,11-12,14H2,1-7H3,(H,35,36)/b15-10+/t16?,18-,19+,24-,27+,28+,29-,30+/m1/s1	IFIKIFMCHAMBFO-LOKDDDFESA-N	Organic compounds	Lipids and lipid-like molecules	Prenol lipids	Triterpenoids
383	MSID000383	Applanoxidic acid G	CID_10256385	C30H40O8	O=C(CC(C1=C[C@H]([C@@]2([C@]1(C)C(=O)C=C1[C@]32O[C@@H]3C[C@@H]2[C@]1(C)CCC(=O)C2(C)C)C)O)(O)C)CC(C(=O)O)C	InChI=1S/C30H40O8/c1-15(24(35)36)10-16(31)14-27(5,37)19-12-22(34)29(7)28(19,6)21(33)11-18-26(4)9-8-20(32)25(2,3)17(26)13-23-30(18,29)38-23/h11-12,15,17,22-23,34,37H,8-10,13-14H2,1-7H3,(H,35,36)/t15?,17-,22+,23+,26-,27?,28-,29+,30-/m0/s1	DYPIHYCSZZORMA-ZVVXJMBHSA-N	Organic compounds	Lipids and lipid-like molecules	Steroids and steroid derivatives	Bile acids, alcohols and derivatives
384	MSID000384	Elfvingic acid B	CID_139588406	C30H40O8	O=C(CC(C1=C[C@H]([C@@]2([C@]1(C)C(=O)C=C1[C@@]32O[C@H]3CC2[C@]1(C)CCC(=O)C2(C)C)C)O)(O)C)CC(C(=O)O)C	InChI=1S/C30H40O8/c1-15(24(35)36)10-16(31)14-27(5,37)19-12-22(34)29(7)28(19,6)21(33)11-18-26(4)9-8-20(32)25(2,3)17(26)13-23-30(18,29)38-23/h11-12,15,17,22-23,34,37H,8-10,13-14H2,1-7H3,(H,35,36)/t15?,17?,22-,23+,26+,27?,28+,29-,30-/m1/s1	DYPIHYCSZZORMA-VAGJCMDPSA-N	Organic compounds	Lipids and lipid-like molecules	Steroids and steroid derivatives	Bile acids, alcohols and derivatives
385	MSID000385	Applanoxidic acid H	CID_10437034	C30H42O8	O=C(CC(C1=CC(=O)[C@@]2([C@]1(C)[C@@H](O)C=C1[C@]32O[C@@H]3C[C@@H]2[C@]1(C)CC[C@@H](C2(C)C)O)C)(O)C)CC(C(=O)O)C	InChI=1S/C30H42O8/c1-15(24(35)36)10-16(31)14-27(5,37)19-12-22(34)29(7)28(19,6)21(33)11-18-26(4)9-8-20(32)25(2,3)17(26)13-23-30(18,29)38-23/h11-12,15,17,20-21,23,32-33,37H,8-10,13-14H2,1-7H3,(H,35,36)/t15?,17-,20-,21-,23+,26-,27?,28-,29+,30-/m0/s1	QZIICLRJPWBMPH-KRVPUEPLSA-N	Organic compounds	Lipids and lipid-like molecules	Steroids and steroid derivatives	Bile acids, alcohols and derivatives
386	MSID000386	Armillaramide	CID_9807776	C34H69NO4	CCCCCCCCCCCCCCCC(=O)NC(C(C(CCCCCCCCCCCCCC)O)O)CO	InChI=1S/C34H69NO4/c1-3-5-7-9-11-13-15-17-19-21-23-25-27-29-33(38)35-31(30-36)34(39)32(37)28-26-24-22-20-18-16-14-12-10-8-6-4-2/h31-32,34,36-37,39H,3-30H2,1-2H3,(H,35,38)	IVBULNXGVIHEKN-UHFFFAOYSA-N	Organic compounds	Lipids and lipid-like molecules	Sphingolipids	Ceramides
387	MSID000387	Armillaridin	CID_51351607	C24H29ClO6	O=CC1=C[C@@H]2CC(C[C@@H]2[C@@]2([C@@]1(O)[C@H](OC(=O)c1c(O)cc(c(c1C)Cl)OC)C2)C)(C)C	InChI=1S/C24H29ClO6/c1-12-19(16(27)7-17(30-5)20(12)25)21(28)31-18-10-23(4)15-9-22(2,3)8-13(15)6-14(11-26)24(18,23)29/h6-7,11,13,15,18,27,29H,8-10H2,1-5H3/t13-,15+,18-,23-,24+/m1/s1	QETHRCCHQRWBIJ-OXKPQTCESA-N	Organic compounds	Lipids and lipid-like molecules	Prenol lipids	Sesquiterpenoids
388	MSID000388	Armillarikin	CID_129320386	C24H29ClO7	O=CC1=C[C@@H]2CC([C@@H]([C@@H]2[C@@]2([C@@]1(O)[C@H](OC(=O)c1c(O)cc(c(c1C)Cl)OC)C2)C)O)(C)C	InChI=1S/C24H29ClO7/c1-11-17(14(27)7-15(31-5)19(11)25)21(29)32-16-9-23(4)18-12(8-22(2,3)20(18)28)6-13(10-26)24(16,23)30/h6-7,10,12,16,18,20,27-28,30H,8-9H2,1-5H3/t12-,16-,18-,20-,23-,24+/m1/s1	LNEWYAZEAYTKQI-UEXMDZLUSA-N	Organic compounds	Lipids and lipid-like molecules	Prenol lipids	Sesquiterpenoids
389	MSID000389	Armillarin	CID_134206	C24H30O6	COc1cc(C)c(c(c1)O)C(=O)O[C@@H]1C[C@]2([C@]1(O)C(=C[C@H]1[C@@H]2CC(C1)(C)C)C=O)C	InChI=1S/C24H30O6/c1-13-6-16(29-5)8-18(26)20(13)21(27)30-19-11-23(4)17-10-22(2,3)9-14(17)7-15(12-25)24(19,23)28/h6-8,12,14,17,19,26,28H,9-11H2,1-5H3/t14-,17+,19-,23-,24+/m1/s1	ISKWRTCZWOXOOF-GNMVUSIZSA-N	Organic compounds	Lipids and lipid-like molecules	Prenol lipids	Sesquiterpenoids
390	MSID000390	Armillol	CID_49798953	C15H24O3	OCC1=C2[C@H](O)C[C@@]2([C@@H]2[C@H]([C@@H]1O)CC(C2)(C)C)C	InChI=1S/C15H24O3/c1-14(2)4-8-10(5-14)15(3)6-11(17)12(15)9(7-16)13(8)18/h8,10-11,13,16-18H,4-7H2,1-3H3/t8-,10+,11-,13+,15-/m1/s1	PCLFPAUKPJZJSB-MELAJVIPSA-N	Organic compounds	Lipids and lipid-like molecules	Prenol lipids	Sesquiterpenoids
391	MSID000391	Armillyl everninate	CID_78173439	C24H32O6	COc1cc(C)c(c(c1)O)C(=O)OC1CC2(C1=C(CO)C(C1C2CC(C1)(C)C)O)C	InChI=1S/C24H32O6/c1-12-6-13(29-5)7-17(26)19(12)22(28)30-18-10-24(4)16-9-23(2,3)8-14(16)21(27)15(11-25)20(18)24/h6-7,14,16,18,21,25-27H,8-11H2,1-5H3	KIBURFBDQVFUHO-UHFFFAOYSA-N	Organic compounds	Lipids and lipid-like molecules	Prenol lipids	Sesquiterpenoids
392	MSID000392	Arnamial	CID_44557095	C24H29ClO6	O=CC1=C2[C@H](OC(=O)c3c(O)cc(c(c3C)Cl)OC)C[C@@]2([C@@H]2[C@H]([C@@H]1O)CC(C2)(C)C)C	InChI=1S/C24H29ClO6/c1-11-18(15(27)6-16(30-5)20(11)25)22(29)31-17-9-24(4)14-8-23(2,3)7-12(14)21(28)13(10-26)19(17)24/h6,10,12,14,17,21,27-28H,7-9H2,1-5H3/t12-,14+,17-,21+,24-/m1/s1	KWJJPEZBNLGOFB-RNNQDMPLSA-N	Organic compounds	Lipids and lipid-like molecules	Prenol lipids	Sesquiterpenoids
393	MSID000393	Aromadendrin	CID_122850	C15H12O6	Oc1ccc(cc1)[C@H]1Oc2cc(O)cc(c2C(=O)[C@@H]1O)O	InChI=1S/C15H12O6/c16-8-3-1-7(2-4-8)15-14(20)13(19)12-10(18)5-9(17)6-11(12)21-15/h1-6,14-18,20H/t14-,15+/m0/s1	PADQINQHPQKXNL-LSDHHAIUSA-N	Organic compounds	Phenylpropanoids and polyketides	Flavonoids	Flavans
394	MSID000394	Artabotryol D	CID_102081037	C30H50O4	O[C@H]([C@H]([C@H]1CC[C@@]2([C@]1(C)CCC1=C2CC[C@@H]2[C@]1(C)CC[C@H](C2(C)C)O)C)C)CC[C@H](C(=O)O)C	InChI=1S/C30H50O4/c1-18(26(33)34)8-10-23(31)19(2)20-12-16-30(7)22-9-11-24-27(3,4)25(32)14-15-28(24,5)21(22)13-17-29(20,30)6/h18-20,23-25,31-32H,8-17H2,1-7H3,(H,33,34)/t18-,19+,20-,23+,24+,25-,28-,29-,30+/m1/s1	DFZQHLZRJXEIAR-APSBUADISA-N	Organic compounds	Lipids and lipid-like molecules	Prenol lipids	Triterpenoids
395	MSID000395	Artabotryols A	CID_71596823	C30H48O3	C[C@@H]1CC[C@H](OC1=O)[C@H]([C@H]1CC[C@@]2([C@]1(C)CCC1=C2CCC2[C@]1(C)CC[C@H](C2(C)C)O)C)C	InChI=1S/C30H48O3/c1-18-8-10-23(33-26(18)32)19(2)20-12-16-30(7)22-9-11-24-27(3,4)25(31)14-15-28(24,5)21(22)13-17-29(20,30)6/h18-20,23-25,31H,8-17H2,1-7H3/t18-,19+,20-,23+,24?,25-,28-,29-,30+/m1/s1	RAVLYMWHELNCTR-MAKMCECFSA-N	Organic compounds	Lipids and lipid-like molecules	Steroids and steroid derivatives	Steroid lactones
396	MSID000396	Asperenone	CID_5368642	C20H22O	CCC(=O)/C=C/C=C/C(=C/C=C/C=C/c1ccccc1)/C	InChI=1S/C20H22O/c1-3-20(21)17-11-10-13-18(2)12-6-4-7-14-19-15-8-5-9-16-19/h4-17H,3H2,1-2H3/b6-4+,13-10+,14-7+,17-11+,18-12+	KMNUJIARVHVQCF-SVCWYOIUSA-N	Organic compounds	Benzenoids	Benzene and substituted derivatives	Styrenes
397	MSID000397	Astraeusin A	CID_139585731	C30H44O2	O=C/C(=C/C=C/[C@H]([C@H]1CC[C@@]2([C@]1(C)CCC1=C2CC[C@@H]2[C@]1(C)CCC(=O)C2(C)C)C)C)/C	InChI=1S/C30H44O2/c1-20(19-31)9-8-10-21(2)22-13-17-30(7)24-11-12-25-27(3,4)26(32)15-16-28(25,5)23(24)14-18-29(22,30)6/h8-10,19,21-22,25H,11-18H2,1-7H3/b10-8+,20-9+/t21-,22-,25+,28-,29-,30+/m1/s1	DXDOEZOHVKXIBO-CCFQRRSOSA-N	Organic compounds	Lipids and lipid-like molecules	Prenol lipids	Triterpenoids
398	MSID000398	Astraeusin B	CID_139587873	C30H46O2	O=C/C(=C/C=C/[C@H]([C@H]1CC[C@@]2([C@]1(C)CCC1=C2CC[C@@H]2[C@]1(C)CC[C@@H](C2(C)C)O)C)C)/C	InChI=1S/C30H46O2/c1-20(19-31)9-8-10-21(2)22-13-17-30(7)24-11-12-25-27(3,4)26(32)15-16-28(25,5)23(24)14-18-29(22,30)6/h8-10,19,21-22,25-26,32H,11-18H2,1-7H3/b10-8+,20-9+/t21-,22-,25+,26+,28-,29-,30+/m1/s1	YWWKREGHNURJMN-QEVHIPFISA-N	Organic compounds	Lipids and lipid-like molecules	Prenol lipids	Triterpenoids
399	MSID000399	Astraeusin C	CID_139584707	C30H46O2	O=C/C(=C/C=C/[C@H]([C@H]1CC[C@@]2([C@]1(C)CCC1=C2CC[C@@H]2[C@]1(C)CC[C@H](C2(C)C)O)C)C)/C	InChI=1S/C30H46O2/c1-20(19-31)9-8-10-21(2)22-13-17-30(7)24-11-12-25-27(3,4)26(32)15-16-28(25,5)23(24)14-18-29(22,30)6/h8-10,19,21-22,25-26,32H,11-18H2,1-7H3/b10-8+,20-9+/t21-,22-,25+,26-,28-,29-,30+/m1/s1	YWWKREGHNURJMN-ASMIHXIMSA-N	Organic compounds	Lipids and lipid-like molecules	Prenol lipids	Triterpenoids
400	MSID000400	Astraeusin D	CID_139583436	C30H48O3	OC/C(=C/C[C@@H]([C@H]([C@H]1CC[C@@]2([C@]1(C)CCC1=C2CC[C@@H]2[C@]1(C)CCC(=O)C2(C)C)C)C)O)/C	InChI=1S/C30H48O3/c1-19(18-31)8-10-24(32)20(2)21-12-16-30(7)23-9-11-25-27(3,4)26(33)14-15-28(25,5)22(23)13-17-29(21,30)6/h8,20-21,24-25,31-32H,9-18H2,1-7H3/b19-8+/t20-,21+,24-,25-,28+,29+,30-/m0/s1	GEDRJURLYBVEGS-OABDCZROSA-N	Organic compounds	Lipids and lipid-like molecules	Prenol lipids	Triterpenoids
401	MSID000401	Astraeusin E	CID_139584197	C30H50O3	OC/C(=C/C[C@@H]([C@H]([C@H]1CC[C@@]2([C@]1(C)CCC1=C2CC[C@@H]2[C@]1(C)CC[C@@H](C2(C)C)O)C)C)O)/C	InChI=1S/C30H50O3/c1-19(18-31)8-10-24(32)20(2)21-12-16-30(7)23-9-11-25-27(3,4)26(33)14-15-28(25,5)22(23)13-17-29(21,30)6/h8,20-21,24-26,31-33H,9-18H2,1-7H3/b19-8+/t20-,21+,24-,25-,26-,28+,29+,30-/m0/s1	UEHNBMMEBJQBAI-OXFAJEQKSA-N	Organic compounds	Lipids and lipid-like molecules	Prenol lipids	Triterpenoids
402	MSID000402	Astraeusin F	CID_139585866	C30H50O3	OC/C(=C/C[C@@H]([C@H]([C@H]1CC[C@@]2([C@]1(C)CCC1=C2CC[C@@H]2[C@]1(C)CC[C@H](C2(C)C)O)C)C)O)/C	InChI=1S/C30H50O3/c1-19(18-31)8-10-24(32)20(2)21-12-16-30(7)23-9-11-25-27(3,4)26(33)14-15-28(25,5)22(23)13-17-29(21,30)6/h8,20-21,24-26,31-33H,9-18H2,1-7H3/b19-8+/t20-,21+,24-,25-,26+,28+,29+,30-/m0/s1	UEHNBMMEBJQBAI-TVKSXFISSA-N	Organic compounds	Lipids and lipid-like molecules	Prenol lipids	Triterpenoids
403	MSID000403	Astraeusin G	CID_132541594	C32H50O5	CC(=O)O[C@H]([C@H]([C@H]1CC[C@@]2([C@]1(C)CCC1=C2CC[C@@H]2[C@]1(C)CC[C@@H](C2(C)C)O)C)C)C/C=C(/C(=O)O)\C	InChI=1S/C32H50O5/c1-19(28(35)36)9-11-25(37-21(3)33)20(2)22-13-17-32(8)24-10-12-26-29(4,5)27(34)15-16-30(26,6)23(24)14-18-31(22,32)7/h9,20,22,25-27,34H,10-18H2,1-8H3,(H,35,36)/b19-9+/t20-,22+,25-,26-,27-,30+,31+,32-/m0/s1	CGUIKBMPCLUENM-BNCUJORJSA-N	Organic compounds	Lipids and lipid-like molecules	Prenol lipids	Triterpenoids
404	MSID000404	Astraodoric acid D	CID_71596901	C32H50O5	CC(=O)O[C@H]([C@H]([C@H]1CC[C@@]2([C@]1(C)CCC1=C2CCC2[C@]1(C)CC[C@H](C2(C)C)O)C)C)C/C=C(/C(=O)O)\C	InChI=1S/C32H50O5/c1-19(28(35)36)9-11-25(37-21(3)33)20(2)22-13-17-32(8)24-10-12-26-29(4,5)27(34)15-16-30(26,6)23(24)14-18-31(22,32)7/h9,20,22,25-27,34H,10-18H2,1-8H3,(H,35,36)/b19-9+/t20-,22+,25-,26?,27+,30+,31+,32-/m0/s1	CGUIKBMPCLUENM-UDQZAEMLSA-N	Organic compounds	Lipids and lipid-like molecules	Prenol lipids	Triterpenoids
405	MSID000405	Astraeusin H	CID_132541595	C32H50O5	CC(=O)O[C@@H]1CC[C@]2([C@H](C1(C)C)CCC1=C2CC[C@]2([C@@]1(C)CC[C@@H]2[C@@H]([C@H](C/C=C(/C(=O)O)\C)O)C)C)C	InChI=1S/C32H50O5/c1-19(28(35)36)9-11-25(34)20(2)22-13-17-32(8)24-10-12-26-29(4,5)27(37-21(3)33)15-16-30(26,6)23(24)14-18-31(22,32)7/h9,20,22,25-27,34H,10-18H2,1-8H3,(H,35,36)/b19-9+/t20-,22+,25-,26-,27+,30+,31+,32-/m0/s1	PDMGRFIQUHQMLF-HRGDRPPLSA-N	Organic compounds	Lipids and lipid-like molecules	Prenol lipids	Triterpenoids
406	MSID000406	Astraeusin I	CID_139588166	C31H48O3	CO[C@H]1O[C@@H](CC=C1C)[C@H]([C@H]1CC[C@@]2([C@]1(C)CCC1=C2CC[C@@H]2[C@]1(C)CCC(=O)C2(C)C)C)C	InChI=1S/C31H48O3/c1-19-9-11-24(34-27(19)33-8)20(2)21-13-17-31(7)23-10-12-25-28(3,4)26(32)15-16-29(25,5)22(23)14-18-30(21,31)6/h9,20-21,24-25,27H,10-18H2,1-8H3/t20-,21+,24-,25-,27-,29+,30+,31-/m0/s1	HJTGQORBOJNTSC-CNYNGXNLSA-N	Organic compounds	Lipids and lipid-like molecules	Prenol lipids	Triterpenoids
407	MSID000407	Astraeusin J	CID_139587446	C31H50O3	CO[C@H]1O[C@@H](CC=C1C)[C@H]([C@H]1CC[C@@]2([C@]1(C)CCC1=C2CC[C@@H]2[C@]1(C)CC[C@H](C2(C)C)O)C)C	InChI=1S/C31H50O3/c1-19-9-11-24(34-27(19)33-8)20(2)21-13-17-31(7)23-10-12-25-28(3,4)26(32)15-16-29(25,5)22(23)14-18-30(21,31)6/h9,20-21,24-27,32H,10-18H2,1-8H3/t20-,21+,24-,25-,26+,27-,29+,30+,31-/m0/s1	DUCQVEBTYJTSOK-KDFMDVDSSA-N	Organic compounds	Lipids and lipid-like molecules	Prenol lipids	Triterpenoids
408	MSID000408	Astraeusin K	CID_139585847	C30H48O3	O[C@@H]1O[C@@H](CC[C@H]1C)[C@H]([C@H]1CC[C@@]2([C@]1(C)CCC1=C2CC[C@@H]2[C@]1(C)CCC(=O)C2(C)C)C)C	InChI=1S/C30H48O3/c1-18-8-10-23(33-26(18)32)19(2)20-12-16-30(7)22-9-11-24-27(3,4)25(31)14-15-28(24,5)21(22)13-17-29(20,30)6/h18-20,23-24,26,32H,8-17H2,1-7H3/t18-,19+,20-,23+,24+,26-,28-,29-,30+/m1/s1	HYEBEDUHRUQRHO-DTFIVSTGSA-N	Organic compounds	Lipids and lipid-like molecules	Prenol lipids	Triterpenoids
409	MSID000409	Astraeusin K epimer	CID_139584108	C30H48O3	O[C@H]1O[C@@H](CC[C@H]1C)[C@H]([C@H]1CC[C@@]2([C@]1(C)CCC1=C2CC[C@@H]2[C@]1(C)CCC(=O)C2(C)C)C)C	InChI=1S/C30H48O3/c1-18-8-10-23(33-26(18)32)19(2)20-12-16-30(7)22-9-11-24-27(3,4)25(31)14-15-28(24,5)21(22)13-17-29(20,30)6/h18-20,23-24,26,32H,8-17H2,1-7H3/t18-,19+,20-,23+,24+,26+,28-,29-,30+/m1/s1	HYEBEDUHRUQRHO-VQGVFSKOSA-N	Organic compounds	Lipids and lipid-like molecules	Prenol lipids	Triterpenoids
410	MSID000410	Astraeusin L	CID_139587512	C30H50O3	OC1O[C@@H](CC[C@H]1C)[C@H]([C@H]1CC[C@@]2([C@]1(C)CCC1=C2CC[C@@H]2[C@]1(C)CC[C@@H](C2(C)C)O)C)C	InChI=1S/C30H50O3/c1-18-8-10-23(33-26(18)32)19(2)20-12-16-30(7)22-9-11-24-27(3,4)25(31)14-15-28(24,5)21(22)13-17-29(20,30)6/h18-20,23-26,31-32H,8-17H2,1-7H3/t18-,19+,20-,23+,24+,25+,26?,28-,29-,30+/m1/s1	DRTROQLYCJSMQX-NPQYCKAFSA-N	Organic compounds	Lipids and lipid-like molecules	Prenol lipids	Triterpenoids
411	MSID000411	Astrakurkurol	CID_139586335	C33H56O3	CCO[C@@H]1O[C@](C)(CC[C@@H]1C)[C@H]([C@H]1CC[C@@]2([C@]1(C)CCC1=C2CC[C@@H]2[C@]1(C)CC[C@@H](C2(C)C)O)C)C	InChI=1S/C33H56O3/c1-10-35-28-21(2)13-20-33(9,36-28)22(3)23-14-18-32(8)25-11-12-26-29(4,5)27(34)16-17-30(26,6)24(25)15-19-31(23,32)7/h21-23,26-28,34H,10-20H2,1-9H3/t21-,22-,23+,26-,27-,28+,30+,31+,32-,33+/m0/s1	NMVFHEIVSJMPPY-QYELQWIWSA-N	Organic compounds	Lipids and lipid-like molecules	Prenol lipids	Triterpenoids
412	MSID000412	Astrakurkurone	CID_139587813	C31H50O3	C[C@H]1CC[C@](OC1=O)(C)[C@H]([C@H]1CC[C@@]2([C@]1(C)CCC1=C2CC[C@@H]2[C@]1(C)CC[C@@H](C2(C)C)O)C)C	InChI=1S/C31H50O3/c1-19-11-18-31(8,34-26(19)33)20(2)21-12-16-30(7)23-9-10-24-27(3,4)25(32)14-15-28(24,5)22(23)13-17-29(21,30)6/h19-21,24-25,32H,9-18H2,1-8H3/t19-,20-,21+,24-,25-,28+,29+,30-,31+/m0/s1	YSVFUMBQSKJOIN-VKPGBLCESA-N	Organic compounds	Lipids and lipid-like molecules	Steroids and steroid derivatives	Steroid lactones
413	MSID000413	Astraodoric acid A	CID_71596543	C32H48O5	CC(=O)O[C@H]([C@H]([C@H]1CC[C@@]2([C@]1(C)CCC1=C2CCC2[C@]1(C)CCC(=O)C2(C)C)C)C)C/C=C(/C(=O)O)\C	InChI=1S/C32H48O5/c1-19(28(35)36)9-11-25(37-21(3)33)20(2)22-13-17-32(8)24-10-12-26-29(4,5)27(34)15-16-30(26,6)23(24)14-18-31(22,32)7/h9,20,22,25-26H,10-18H2,1-8H3,(H,35,36)/b19-9+/t20-,22+,25-,26?,30+,31+,32-/m0/s1	GEVSLAUNZNQKOU-UUDJYBKASA-N	Organic compounds	Lipids and lipid-like molecules	Prenol lipids	Triterpenoids
414	MSID000414	Astraodoric acid B	CID_139583560	C30H46O4	OC([C@H]([C@H]1CC[C@@]2([C@]1(C)CCC1=C2CCC2[C@]1(C)CCC(=O)C2(C)C)C)C)C/C=C(/C(=O)O)\C	InChI=1S/C30H46O4/c1-18(26(33)34)8-10-23(31)19(2)20-12-16-30(7)22-9-11-24-27(3,4)25(32)14-15-28(24,5)21(22)13-17-29(20,30)6/h8,19-20,23-24,31H,9-17H2,1-7H3,(H,33,34)/b18-8+/t19-,20+,23?,24?,28+,29+,30-/m0/s1	DAWUBVGAAHCLBD-GRDZBGGZSA-N	Organic compounds	Lipids and lipid-like molecules	Prenol lipids	Triterpenoids
415	MSID000415	Astraodoric acid C	CID_71596715	C30H48O4	O[C@H]([C@H]([C@H]1CC[C@@]2([C@]1(C)CCC1=C2CCC2[C@]1(C)CC[C@@H](C2(C)C)O)C)C)C/C=C(/C(=O)O)\C	InChI=1S/C30H48O4/c1-18(26(33)34)8-10-23(31)19(2)20-12-16-30(7)22-9-11-24-27(3,4)25(32)14-15-28(24,5)21(22)13-17-29(20,30)6/h8,19-20,23-25,31-32H,9-17H2,1-7H3,(H,33,34)/b18-8+/t19-,20+,23-,24?,25-,28+,29+,30-/m0/s1	ZOAZKOJQEVTDKV-ROSCIQIVSA-N	Organic compounds	Lipids and lipid-like molecules	Prenol lipids	Triterpenoids
416	MSID000416	Austraeusin O		C30H48O4	O[C@H]([C@H]([C@H]1CC[C@@]2([C@]1(C)CCC1=C2CC[C@@H]2[C@]1(C)CC[C@H](C2(C)C)O)C)C)C/C=C(/C(=O)O)\C	InChI=1S/C30H48O4/c1-18(26(33)34)8-10-23(31)19(2)20-12-16-30(7)22-9-11-24-27(3,4)25(32)14-15-28(24,5)21(22)13-17-29(20,30)6/h8,19-20,23-25,31-32H,9-17H2,1-7H3,(H,33,34)/b18-8+/t19-,20+,23-,24-,25+,28+,29+,30-/m0/s1	ZOAZKOJQEVTDKV-YYWDROCWSA-N	Organic compounds	Lipids and lipid-like molecules	Prenol lipids	Triterpenoids
417	MSID000417	Astrasiaone	CID_132556695	C31H50O3	CO[C@@H]1O[C@@H](CC[C@H]1C)[C@H]([C@H]1CC[C@@]2([C@]1(C)CCC1=C2CC[C@@H]2[C@]1(C)CCC(=O)C2(C)C)C)C	InChI=1S/C31H50O3/c1-19-9-11-24(34-27(19)33-8)20(2)21-13-17-31(7)23-10-12-25-28(3,4)26(32)15-16-29(25,5)22(23)14-18-30(21,31)6/h19-21,24-25,27H,9-18H2,1-8H3/t19-,20+,21-,24+,25+,27-,29-,30-,31+/m1/s1	PHLQZUYHOWPYNU-YVFRMSICSA-N	Organic compounds	Lipids and lipid-like molecules	Prenol lipids	Triterpenoids
418	MSID000418	Astrasiate	CID_132556696	C31H52O4	COC(=O)[C@@H](CC[C@@H]([C@H]([C@H]1CC[C@@]2([C@]1(C)CCC1=C2CC[C@@H]2[C@]1(C)CC[C@H](C2(C)C)O)C)C)O)C	InChI=1S/C31H52O4/c1-19(27(34)35-8)9-11-24(32)20(2)21-13-17-31(7)23-10-12-25-28(3,4)26(33)15-16-29(25,5)22(23)14-18-30(21,31)6/h19-21,24-26,32-33H,9-18H2,1-8H3/t19-,20+,21-,24+,25+,26-,29-,30-,31+/m1/s1	VRNFHYHHKZYJHI-FZUFJPLHSA-N	Organic compounds	Lipids and lipid-like molecules	Prenol lipids	Triterpenoids
419	MSID000419	Atractylenolide I	CID_5321018	C15H18O2	C=C1CCC[C@]2([C@H]1CC1=C(C)C(=O)OC1=C2)C	InChI=1S/C15H18O2/c1-9-5-4-6-15(3)8-13-11(7-12(9)15)10(2)14(16)17-13/h8,12H,1,4-7H2,2-3H3/t12-,15+/m0/s1	ZTVSGQPHMUYCRS-SWLSCSKDSA-N	Organic compounds	Organoheterocyclic compounds	Naphthofurans
420	MSID000420	Aurovertin B	CID_444853	C25H32O8	CC[C@H]1O[C@@]2([C@@H]([C@@]1(C)O[C@H]([C@@H]2O)/C=C/C=C/C=C/c1oc(=O)cc(c1C)OC)OC(=O)C)C	InChI=1S/C25H32O8/c1-7-20-24(4)23(30-16(3)26)25(5,33-20)22(28)18(32-24)13-11-9-8-10-12-17-15(2)19(29-6)14-21(27)31-17/h8-14,18,20,22-23,28H,7H2,1-6H3/b9-8+,12-10+,13-11+/t18-,20+,22-,23+,24-,25-/m0/s1	QXCOFYWOWZJFEA-YJMRODJJSA-N	Organic compounds	Organic oxygen compounds	Organooxygen compounds	Carbohydrates and carbohydrate conjugates
421	MSID000421	Aurovertin E	CID_85425502	C23H30O7	CCC1OC2(C(C1(C)OC(C2O)C=CC=CC=Cc1oc(=O)cc(c1C)OC)O)C	InChI=1S/C23H30O7/c1-6-18-22(3)21(26)23(4,30-18)20(25)16(29-22)12-10-8-7-9-11-15-14(2)17(27-5)13-19(24)28-15/h7-13,16,18,20-21,25-26H,6H2,1-5H3	ZPRKRBDMVCYLBR-UHFFFAOYSA-N	Organic compounds	Organic oxygen compounds	Organooxygen compounds	Carbohydrates and carbohydrate conjugates
422	MSID000422	Australic acid	CID_101761156	C32H42O7	OC(=O)CC[C@@]1(C)[C@@H](C[C@@H]2[C@]3(C1=CC(=O)[C@]1([C@@]3(C)[C@H](C[C@@H]1/C(=C\[C@H]1C[C@H](C(=O)O1)C)/C)C(=O)C)C)O2)C(=C)C	InChI=1S/C32H42O7/c1-16(2)21-14-26-32(39-26)24(29(21,6)10-9-27(35)36)15-25(34)30(7)22(13-23(19(5)33)31(30,32)8)17(3)11-20-12-18(4)28(37)38-20/h11,15,18,20-23,26H,1,9-10,12-14H2,2-8H3,(H,35,36)/b17-11-/t18-,20+,21+,22-,23-,26-,29+,30+,31-,32+/m1/s1	DDMDFQFSDBWUKJ-UKDIAUJWSA-N	Organic compounds	Lipids and lipid-like molecules	Prenol lipids	Triterpenoids
423	MSID000423	Austrolactone	CID_10482058	C30H40O8	C[C@H]1C[C@@]2(OC1=O)O[C@H]1C(=O)C3=C([C@]4([C@]1(C(=C[C@H]4O)[C@@](C2)(C)O)C)C)C(=O)C[C@@H]1[C@]3(C)CC[C@@H](C1(C)C)O	InChI=1S/C30H40O8/c1-14-12-30(38-24(14)35)13-27(5,36)17-11-19(33)29(7)20-15(31)10-16-25(2,3)18(32)8-9-26(16,4)21(20)22(34)23(37-30)28(17,29)6/h11,14,16,18-19,23,32-33,36H,8-10,12-13H2,1-7H3/t14-,16-,18-,19+,23-,26-,27-,28-,29-,30-/m0/s1	SZXITMVEKFHHKF-GAKIQRCLSA-N	Organic compounds	Lipids and lipid-like molecules	Steroids and steroid derivatives	Steroid lactones
424	MSID000424	Baumin	CID_54737530	C27H22O11	COC(=O)CC1=CC(=O)[C@@H]([C@H](O1)c1ccc(c(c1)O)O)c1c(O)cc(oc1=O)/C=C/c1ccc(c(c1)O)O	InChI=1S/C27H22O11/c1-36-23(34)12-16-11-21(32)24(26(37-16)14-4-7-18(29)20(31)9-14)25-22(33)10-15(38-27(25)35)5-2-13-3-6-17(28)19(30)8-13/h2-11,24,26,28-31,33H,12H2,1H3/b5-2+/t24-,26-/m1/s1	JZRMMLYGOBWIGY-HZFVGLMFSA-N	Organic compounds	Benzenoids	Phenols	Benzenediols
425	MSID000425	Beauvericin	CID_3007984	C45H57N3O9	CC([C@H]1OC(=O)[C@H](Cc2ccccc2)N(C)C(=O)[C@H](OC(=O)[C@@H](N(C(=O)[C@H](OC(=O)[C@@H](N(C1=O)C)Cc1ccccc1)C(C)C)C)Cc1ccccc1)C(C)C)C	InChI=1S/C45H57N3O9/c1-28(2)37-40(49)46(7)35(26-32-21-15-11-16-22-32)44(53)56-39(30(5)6)42(51)48(9)36(27-33-23-17-12-18-24-33)45(54)57-38(29(3)4)41(50)47(8)34(43(52)55-37)25-31-19-13-10-14-20-31/h10-24,28-30,34-39H,25-27H2,1-9H3/t34-,35-,36-,37+,38+,39+/m0/s1	GYSCAQFHASJXRS-FFCOJMSVSA-N	Organic compounds	Organic acids and derivatives	Peptidomimetics	Depsipeptides
426	MSID000426	Benzocamphorin A	CID_54670088	C14H14O5	COc1c(C)c(C#CC(=O)C)c2c(c1OC)OCO2	InChI=1S/C14H14O5/c1-8(15)5-6-10-9(2)11(16-3)13(17-4)14-12(10)18-7-19-14/h7H2,1-4H3	RZGRLJDEIJYNEU-UHFFFAOYSA-N	Organic compounds	Organoheterocyclic compounds	Benzodioxoles
427	MSID000427	Benzocamphorin B	CID_53322607	C15H16O4	COc1c(C)c(C#CC(=C)C)c2c(c1OC)OCO2	InChI=1S/C15H16O4/c1-9(2)6-7-11-10(3)12(16-4)14(17-5)15-13(11)18-8-19-15/h1,8H2,2-5H3	OJOWAFWCUHHNHF-UHFFFAOYSA-N	Organic compounds	Organoheterocyclic compounds	Benzodioxoles
428	MSID000428	Benzocamphorin D	CID_54670182	C19H20O8	COc1c(C)cc(c2c1OCO2)Oc1c(C)c(OC)c2c(c1OC)OCO2	InChI=1S/C19H20O8/c1-9-6-11(15-17(12(9)20-3)24-7-23-15)27-14-10(2)13(21-4)18-19(16(14)22-5)26-8-25-18/h6H,7-8H2,1-5H3	UWSFOKXOTLMKRU-UHFFFAOYSA-N	Organic compounds	Organic oxygen compounds	Organooxygen compounds	Ethers
429	MSID000429	Benzocamphorin E	CID_89989916	C18H18O8	COc1c(C)c(c2c(C)c(OC)c3c(c2O)OCO3)c(c2c1OCO2)O	InChI=1S/C18H18O8/c1-7-9(11(19)15-17(13(7)21-3)25-5-23-15)10-8(2)14(22-4)18-16(12(10)20)24-6-26-18/h19-20H,5-6H2,1-4H3	GCHMSLBRCLIDEX-UHFFFAOYSA-N	Organic compounds	Phenylpropanoids and polyketides	Tannins	Hydrolyzable tannins
430	MSID000430	Benzocamphorin H	CID_71483264	C14H16O3	COc1cc(OC)c(c(c1C#CC(=C)C)C)O	InChI=1S/C14H16O3/c1-9(2)6-7-11-10(3)14(15)13(17-5)8-12(11)16-4/h8,15H,1H2,2-5H3	HLQDPYGDTHAJTB-UHFFFAOYSA-N	Organic compounds	Benzenoids	Phenols	Methoxyphenols
431	MSID000431	beta-Barbatene	CID_14109421	C15H24	C=C1CC[C@@]2(C[C@H]1[C@]1(C)CCC[C@]21C)C	InChI=1S/C15H24/c1-11-6-9-13(2)10-12(11)14(3)7-5-8-15(13,14)4/h12H,1,5-10H2,2-4H3/t12-,13-,14+,15-/m1/s1	RTONMYLSQISFQA-APIJFGDWSA-N	Organic compounds	Hydrocarbons	Unsaturated hydrocarbons	Branched unsaturated hydrocarbons
432	MSID000432	beta-Copaene	CID_57339298	C15H24	CC([C@@H]1CC[C@]2([C@@H]3[C@H]1C2C(=C)CC3)C)C	InChI=1S/C15H24/c1-9(2)11-7-8-15(4)12-6-5-10(3)14(15)13(11)12/h9,11-14H,3,5-8H2,1-2,4H3/t11-,12-,13-,14?,15-/m0/s1	UPVZPMJSRSWJHQ-XIQJJJERSA-N	Organic compounds	Lipids and lipid-like molecules	Prenol lipids	Sesquiterpenoids
433	MSID000433	beta-Elemene	CID_6918391	C15H24	C=C[C@]1(C)CC[C@H](C[C@H]1C(=C)C)C(=C)C	InChI=1S/C15H24/c1-7-15(6)9-8-13(11(2)3)10-14(15)12(4)5/h7,13-14H,1-2,4,8-10H2,3,5-6H3/t13-,14+,15-/m1/s1	OPFTUNCRGUEPRZ-QLFBSQMISA-N	Organic compounds	Lipids and lipid-like molecules	Prenol lipids	Sesquiterpenoids
434	MSID000434	Betulinan A	CID_180510	C20H16O4	COC1=C(c2ccccc2)C(=O)C(=C(C1=O)c1ccccc1)OC	InChI=1S/C20H16O4/c1-23-19-15(13-9-5-3-6-10-13)18(22)20(24-2)16(17(19)21)14-11-7-4-8-12-14/h3-12H,1-2H3	WEOWAYMMZVELOQ-UHFFFAOYSA-N	Organic compounds	Organic oxygen compounds	Organooxygen compounds	Carbonyl compounds
435	MSID000435	Betulinan B	CID_3050396	C20H14O4	COC1=C(c2ccccc2)C(=O)C2=C(C1=O)c1ccccc1CO2	InChI=1S/C20H14O4/c1-23-19-15(12-7-3-2-4-8-12)17(21)20-16(18(19)22)14-10-6-5-9-13(14)11-24-20/h2-10H,11H2,1H3	IIJJGBPPKPHWQB-UHFFFAOYSA-N	Organic compounds	Organoheterocyclic compounds	Benzopyrans	2-benzopyrans
436	MSID000436	Bis[6-(3,4,7-trihydroxy-3, 7-dimethyloctenyl) ether	CID_15895325	C20H38O7	C=CC(C(CC(C(O)(C)C)OC(C(O)(C)C)CC(C(C=C)(O)C)O)O)(O)C	InChI=1S/C20H38O7/c1-9-19(7,25)13(21)11-15(17(3,4)23)27-16(18(5,6)24)12-14(22)20(8,26)10-2/h9-10,13-16,21-26H,1-2,11-12H2,3-8H3	AFYKJKWLNLIKRG-UHFFFAOYSA-N	Organic compounds	Organic oxygen compounds	Organooxygen compounds	Alcohols and polyols
437	MSID000437	Bis[6-(3,4,7-trihydroxy-3,7-dimethyloctenyl)] ether	CID_139586400	C20H38O7	C=CC(C(C(CC(O)(C)C)O)OC(C(C=C)(O)C)C(CC(O)(C)C)O)(O)C	InChI=1S/C20H38O7/c1-9-19(7,25)15(13(21)11-17(3,4)23)27-16(20(8,26)10-2)14(22)12-18(5,6)24/h9-10,13-16,21-26H,1-2,11-12H2,3-8H3	RZOLATFOMQUCOR-UHFFFAOYSA-N	Organic compounds	Organic oxygen compounds	Organooxygen compounds	Alcohols and polyols
438	MSID000438	Blazeispirol A	CID_11153754	C25H34O4	COc1ccc2c(c1C)C=C[C@]1([C@@]32CC[C@@H]1[C@@H]([C@@]1(O3)OC([C@H]([C@H]1O)C)(C)C)C)C	InChI=1S/C25H34O4/c1-14-17-10-12-23(6)18-11-13-24(23,19(17)8-9-20(14)27-7)29-25(15(18)2)21(26)16(3)22(4,5)28-25/h8-10,12,15-16,18,21,26H,11,13H2,1-7H3/t15-,16-,18+,21+,23+,24-,25-/m0/s1	QJEDIZUTQZCCNK-TVHHQFAESA-N	Organic compounds	Organoheterocyclic compounds	Naphthopyrans
439	MSID000439	Blazeispirol C	CID_636634	C25H36O4	COc1ccc2c(c1C)CC[C@]1([C@@]32CC[C@@H]1[C@@H]([C@@]1(O3)OC([C@H]([C@H]1O)C)(C)C)C)C	InChI=1S/C25H36O4/c1-14-17-10-12-23(6)18-11-13-24(23,19(17)8-9-20(14)27-7)29-25(15(18)2)21(26)16(3)22(4,5)28-25/h8-9,15-16,18,21,26H,10-13H2,1-7H3/t15-,16-,18+,21+,23+,24-,25-/m0/s1	QEVQGAGSLSJTLO-TVHHQFAESA-N	Organic compounds	Organoheterocyclic compounds	Naphthopyrans
440	MSID000440	Blazeispirol D	CID_15516914	C24H32O4	C[C@H]1[C@H]2CC[C@]3([C@]2(C)C=Cc2c3ccc(c2C)O)O[C@]21OC([C@H]([C@H]2O)C)(C)C	InChI=1S/C24H32O4/c1-13-16-9-11-22(6)17-10-12-23(22,18(16)7-8-19(13)25)28-24(14(17)2)20(26)15(3)21(4,5)27-24/h7-9,11,14-15,17,20,25-26H,10,12H2,1-6H3/t14-,15-,17+,20+,22+,23-,24-/m0/s1	GCZMATIVRQRSGU-PBRODLAQSA-N	Organic compounds	Organoheterocyclic compounds	Naphthopyrans
441	MSID000441	Blazeispirol E	CID_12069786	C25H34O5	OCc1c(OC)ccc2c1C=C[C@]1([C@@]32CC[C@@H]1[C@@H]([C@@]1(O3)OC([C@H]([C@H]1O)C)(C)C)C)C	InChI=1S/C25H34O5/c1-14-18-10-12-24(30-25(14)21(27)15(2)22(3,4)29-25)19-7-8-20(28-6)17(13-26)16(19)9-11-23(18,24)5/h7-9,11,14-15,18,21,26-27H,10,12-13H2,1-6H3/t14-,15-,18+,21+,23+,24-,25-/m0/s1	ZZLUANSADFHKRE-OFDNLDAYSA-N	Organic compounds	Organoheterocyclic compounds	Naphthopyrans
442	MSID000442	Blazeispirol F	CID_12069787	C24H34O4	C[C@H]1[C@H]2CC[C@]3([C@]2(C)CCc2c3ccc(c2C)O)O[C@]21OC([C@H]([C@H]2O)C)(C)C	InChI=1S/C24H34O4/c1-13-16-9-11-22(6)17-10-12-23(22,18(16)7-8-19(13)25)28-24(14(17)2)20(26)15(3)21(4,5)27-24/h7-8,14-15,17,20,25-26H,9-12H2,1-6H3/t14-,15-,17+,20+,22+,23-,24-/m0/s1	BDAPRCLUBGTBFD-PBRODLAQSA-N	Organic compounds	Organoheterocyclic compounds	Naphthopyrans
443	MSID000443	Blazeispirol G	CID_101213279	C25H36O5	COc1ccc2c(c1C)[C@H](O)C[C@]1([C@@]32CC[C@@H]1[C@@H]([C@@]1(O3)OC([C@H]([C@H]1O)C)(C)C)C)C	InChI=1S/C25H36O5/c1-13-19(28-7)9-8-17-20(13)18(26)12-23(6)16-10-11-24(17,23)30-25(14(16)2)21(27)15(3)22(4,5)29-25/h8-9,14-16,18,21,26-27H,10-12H2,1-7H3/t14-,15-,16+,18+,21+,23+,24-,25-/m0/s1	MZTFHKCGOTZMAW-TUHYAZFOSA-N	Organic compounds	Organoheterocyclic compounds	Naphthopyrans
444	MSID000444	Blazeispirol I	CID_101213280	C25H34O5	OC[C@H]1[C@@H](O)[C@@]2(OC1(C)C)O[C@@]13CC[C@H]([C@@H]2C)[C@@]3(C)C=Cc2c1ccc(c2C)OC	InChI=1S/C25H34O5/c1-14-16-9-11-23(5)17-10-12-24(23,18(16)7-8-20(14)28-6)30-25(15(17)2)21(27)19(13-26)22(3,4)29-25/h7-9,11,15,17,19,21,26-27H,10,12-13H2,1-6H3/t15-,17+,19-,21+,23+,24-,25-/m0/s1	ZQFUYFFDPNJAJG-MGPHVKMZSA-N	Organic compounds	Organoheterocyclic compounds	Naphthopyrans
445	MSID000445	Blazeispirol U	CID_101213282	C28H36O4	O=C1CC[C@]2(C(=C1)C=CC1=C2C=C[C@]2([C@@]31CC[C@@H]2[C@@H]([C@@]1(O3)OC([C@H]([C@H]1O)C)(C)C)C)C)C	InChI=1S/C28H36O4/c1-16-20-11-14-27(32-28(16)23(30)17(2)24(3,4)31-28)22-8-7-18-15-19(29)9-12-25(18,5)21(22)10-13-26(20,27)6/h7-8,10,13,15-17,20,23,30H,9,11-12,14H2,1-6H3/t16-,17-,20+,23+,25-,26+,27-,28-/m0/s1	YOKQBCLMOKKBED-AJZAVILDSA-N	Organic compounds	Organoheterocyclic compounds	Naphthopyrans
446	MSID000446	Blazeispirol V	CID_636827	C28H38O6	O=C1CC[C@]2(C(=C1)[C@@H](O)[C@H](C1=C2C=C[C@]2([C@@]31CC[C@@H]2[C@@H]([C@@]1(O3)OC([C@H]([C@H]1O)C)(C)C)C)C)O)C	InChI=1S/C28H38O6/c1-14-17-9-12-27(34-28(14)23(32)15(2)24(3,4)33-28)20-18(8-11-26(17,27)6)25(5)10-7-16(29)13-19(25)21(30)22(20)31/h8,11,13-15,17,21-23,30-32H,7,9-10,12H2,1-6H3/t14-,15-,17+,21+,22-,23+,25+,26+,27-,28-/m0/s1	GKTIPUYIQKAQLI-XBUYSURHSA-N	Organic compounds	Organoheterocyclic compounds	Naphthopyrans
447	MSID000447	blazeispirol V1	CID_101213283	C28H38O6	O=C1CC[C@]2(C(=C1)[C@H](O)[C@H](C1=C2C=C[C@]2([C@@]31CC[C@@H]2[C@@H]([C@@]1(O3)OC([C@H]([C@H]1O)C)(C)C)C)C)O)C	InChI=1S/C28H38O6/c1-14-17-9-12-27(34-28(14)23(32)15(2)24(3,4)33-28)20-18(8-11-26(17,27)6)25(5)10-7-16(29)13-19(25)21(30)22(20)31/h8,11,13-15,17,21-23,30-32H,7,9-10,12H2,1-6H3/t14-,15-,17+,21-,22-,23+,25+,26+,27-,28-/m0/s1	GKTIPUYIQKAQLI-LTGVEDDOSA-N	Organic compounds	Organoheterocyclic compounds	Naphthopyrans
448	MSID000448	Blazeispirol X	CID_15885638	C28H38O4	O[C@H]1CCc2c(C1)c(C)c1c(c2)[C@]23CC[C@@H]([C@]3(C=C1)C)[C@@H]([C@@]1(O2)OC([C@H]([C@H]1O)C)(C)C)C	InChI=1S/C28H38O4/c1-15-20-9-11-26(6)22-10-12-27(26,23(20)13-18-7-8-19(29)14-21(15)18)32-28(16(22)2)24(30)17(3)25(4,5)31-28/h9,11,13,16-17,19,22,24,29-30H,7-8,10,12,14H2,1-6H3/t16-,17-,19-,22+,24+,26+,27-,28-/m0/s1	VBISPJCTWIICDB-RDCGBHQJSA-N	Organic compounds	Organoheterocyclic compounds	Naphthopyrans
449	MSID000449	Blazeispirol Z	CID_15516915	C28H38O5	CC(=O)CC[C@@]1(C)C(=O)C=CC2=C1C=C[C@]1([C@@]32CC[C@@H]1[C@@H]([C@@]1(O3)OC([C@H]([C@H]1O)C)(C)C)C)C	InChI=1S/C28H38O5/c1-16(29)10-13-25(6)20-11-14-26(7)19-12-15-27(26,21(20)8-9-22(25)30)33-28(17(19)2)23(31)18(3)24(4,5)32-28/h8-9,11,14,17-19,23,31H,10,12-13,15H2,1-7H3/t17-,18-,19+,23+,25+,26+,27-,28-/m0/s1	JVIAZBVHYUCQQG-NAKLDNGTSA-N	Organic compounds	Organoheterocyclic compounds	Naphthopyrans
450	MSID000450	Blazeispirol Z1	CID_101213281	C28H40O5	CC(=O)CC[C@@]1(C)C(=O)C=CC2=C1CC[C@]1([C@@]32CC[C@@H]1[C@@H]([C@@]1(O3)OC([C@H]([C@H]1O)C)(C)C)C)C	InChI=1S/C28H40O5/c1-16(29)10-13-25(6)20-11-14-26(7)19-12-15-27(26,21(20)8-9-22(25)30)33-28(17(19)2)23(31)18(3)24(4,5)32-28/h8-9,17-19,23,31H,10-15H2,1-7H3/t17-,18-,19+,23+,25+,26+,27-,28-/m0/s1	JASZNDQUKJVDQJ-NAKLDNGTSA-N	Organic compounds	Organoheterocyclic compounds	Naphthopyrans
451	MSID000451	Brassicasterol	CID_5281327	C28H46O	O[C@H]1CC[C@]2(C(=CC[C@@H]3[C@@H]2CC[C@]2([C@H]3CC[C@@H]2[C@@H](/C=C/[C@@H](C(C)C)C)C)C)C1)C	InChI=1S/C28H46O/c1-18(2)19(3)7-8-20(4)24-11-12-25-23-10-9-21-17-22(29)13-15-27(21,5)26(23)14-16-28(24,25)6/h7-9,18-20,22-26,29H,10-17H2,1-6H3/b8-7+/t19-,20+,22-,23-,24+,25-,26-,27-,28+/m0/s1	OILXMJHPFNGGTO-ZAUYPBDWSA-N	Organic compounds	Lipids and lipid-like molecules	Steroids and steroid derivatives	Ergostane steroids
452	MSID000452	Butyl ganoderate A	CID_46184561	C34H52O7	CCCCOC(=O)[C@@H](CC(=O)C[C@H]([C@H]1C[C@@H]([C@@]2([C@]1(C)CC(=O)C1=C2[C@@H](O)C[C@@H]2[C@]1(C)CCC(=O)C2(C)C)C)O)C)C	InChI=1S/C34H52O7/c1-9-10-13-41-30(40)20(3)15-21(35)14-19(2)22-16-27(39)34(8)29-23(36)17-25-31(4,5)26(38)11-12-32(25,6)28(29)24(37)18-33(22,34)7/h19-20,22-23,25,27,36,39H,9-18H2,1-8H3/t19-,20-,22-,23+,25+,27+,32+,33-,34+/m1/s1	WQMDPDQGTLRSTR-NSIFHFCWSA-N	Organic compounds	Lipids and lipid-like molecules	Prenol lipids	Triterpenoids
453	MSID000453	Butyl ganoderate B	CID_46184562	C34H52O7	CCCCOC(=O)[C@@H](CC(=O)C[C@H]([C@H]1CC(=O)[C@@]2([C@]1(C)CC(=O)C1=C2[C@@H](O)C[C@@H]2[C@]1(C)CC[C@@H](C2(C)C)O)C)C)C	InChI=1S/C34H52O7/c1-9-10-13-41-30(40)20(3)15-21(35)14-19(2)22-16-27(39)34(8)29-23(36)17-25-31(4,5)26(38)11-12-32(25,6)28(29)24(37)18-33(22,34)7/h19-20,22-23,25-26,36,38H,9-18H2,1-8H3/t19-,20-,22-,23+,25+,26+,32+,33-,34+/m1/s1	OCEDEURDZRRULA-SXTUCIETSA-N	Organic compounds	Lipids and lipid-like molecules	Prenol lipids	Triterpenoids
454	MSID000454	Butyl lucidenate A	CID_46184564	C31H46O6	CCCCOC(=O)CC[C@H]([C@H]1CC(=O)[C@@]2([C@]1(C)CC(=O)C1=C2[C@@H](O)C[C@@H]2[C@]1(C)CCC(=O)C2(C)C)C)C	InChI=1S/C31H46O6/c1-8-9-14-37-25(36)11-10-18(2)19-15-24(35)31(7)27-20(32)16-22-28(3,4)23(34)12-13-29(22,5)26(27)21(33)17-30(19,31)6/h18-20,22,32H,8-17H2,1-7H3/t18-,19-,20+,22+,29+,30-,31+/m1/s1	VTRNTNWDQWDREE-UGUHEFQYSA-N	Organic compounds	Lipids and lipid-like molecules	Prenol lipids	Triterpenoids
455	MSID000455	Butyl lucidenate D2	CID_71561505	C33H46O8	CCCCOC(=O)CC[C@H]([C@H]1CC(=O)[C@@]2([C@]1(C)[C@H](OC(=O)C)C(=O)C1=C2C(=O)C[C@@H]2[C@]1(C)CCC(=O)C2(C)C)C)C	InChI=1S/C33H46O8/c1-9-10-15-40-25(38)12-11-18(2)20-16-24(37)33(8)26-21(35)17-22-30(4,5)23(36)13-14-31(22,6)27(26)28(39)29(32(20,33)7)41-19(3)34/h18,20,22,29H,9-17H2,1-8H3/t18-,20-,22+,29-,31+,32+,33+/m1/s1	DGDZKQQCSYXYAZ-FRSCHERESA-N	Organic compounds	Lipids and lipid-like molecules	Prenol lipids	Triterpenoids
456	MSID000456	Butyl lucidenate E2	CID_71561377	C33H48O8	CCCCOC(=O)CC[C@H]([C@H]1CC(=O)[C@@]2([C@]1(C)[C@H](OC(=O)C)C(=O)C1=C2C(=O)C[C@@H]2[C@]1(C)CC[C@@H](C2(C)C)O)C)C	InChI=1S/C33H48O8/c1-9-10-15-40-25(38)12-11-18(2)20-16-24(37)33(8)26-21(35)17-22-30(4,5)23(36)13-14-31(22,6)27(26)28(39)29(32(20,33)7)41-19(3)34/h18,20,22-23,29,36H,9-17H2,1-8H3/t18-,20-,22+,23+,29-,31+,32+,33+/m1/s1	GEKHMMSACYDGPN-MMOMKNLBSA-N	Organic compounds	Lipids and lipid-like molecules	Prenol lipids	Triterpenoids
457	MSID000457	Butyl lucidenate P	CID_71561376	C33H50O8	CCCCOC(=O)CC[C@H]([C@H]1CC(=O)[C@@]2([C@]1(C)[C@H](OC(=O)C)C(=O)C1=C2[C@@H](O)C[C@@H]2[C@]1(C)CC[C@@H](C2(C)C)O)C)C	InChI=1S/C33H50O8/c1-9-10-15-40-25(38)12-11-18(2)20-16-24(37)33(8)26-21(35)17-22-30(4,5)23(36)13-14-31(22,6)27(26)28(39)29(32(20,33)7)41-19(3)34/h18,20-23,29,35-36H,9-17H2,1-8H3/t18-,20-,21+,22+,23+,29-,31+,32+,33+/m1/s1	KLJAWVAKODZGOX-WPVPHOMXSA-N	Organic compounds	Lipids and lipid-like molecules	Prenol lipids	Triterpenoids
458	MSID000458	Butyl lucidenate Q	CID_71582788	C31H48O6	CCCCOC(=O)CC[C@H]([C@H]1C[C@@H]([C@@]2([C@]1(C)CC(=O)C1=C2[C@@H](O)CC2[C@]1(C)CCC(=O)C2(C)C)C)O)C	InChI=1S/C31H48O6/c1-8-9-14-37-25(36)11-10-18(2)19-15-24(35)31(7)27-20(32)16-22-28(3,4)23(34)12-13-29(22,5)26(27)21(33)17-30(19,31)6/h18-20,22,24,32,35H,8-17H2,1-7H3/t18-,19-,20+,22?,24+,29+,30-,31+/m1/s1	BNIRNFGPJVLFAH-IRSMUZKKSA-N	Organic compounds	Lipids and lipid-like molecules	Prenol lipids	Triterpenoids
459	MSID000459	Ganoderic acid T	CID_21637704	C36H52O8	CC(=O)O[C@H]1C[C@@H]([C@@]2([C@]1(C)C1=CC[C@@H]3[C@](C1=CC2)(C)CC[C@H](C3(C)C)OC(=O)C)C)[C@@H]([C@@H](OC(=O)C)C/C=C(/C(=O)O)\C)C	InChI=1S/C36H52O8/c1-20(32(40)41)11-13-28(42-22(3)37)21(2)27-19-31(44-24(5)39)36(10)26-12-14-29-33(6,7)30(43-23(4)38)16-17-34(29,8)25(26)15-18-35(27,36)9/h11-12,15,21,27-31H,13-14,16-19H2,1-10H3,(H,40,41)/b20-11+/t21-,27+,28-,29-,30+,31-,34+,35+,36+/m0/s1	OCLVBEOPEKEKNM-CAXIOAJTSA-N	Organic compounds	Lipids and lipid-like molecules	Prenol lipids	Triterpenoids
460	MSID000460	Lanosta-7,9(11),24-trien-3b,15 a ,22b-triacetoxy-26-oic acid		C36H52O8	CC(=O)O[C@H]1C[C@@H]([C@@]2([C@]1(C)C1=CCC3[C@](C1=CC2)(C)CC[C@@H](C3(C)C)OC(=O)C)C)[C@@H]([C@@H](OC(=O)C)C/C=C(/C(=O)O)\C)C	InChI=1S/C36H52O8/c1-20(32(40)41)11-13-28(42-22(3)37)21(2)27-19-31(44-24(5)39)36(10)26-12-14-29-33(6,7)30(43-23(4)38)16-17-34(29,8)25(26)15-18-35(27,36)9/h11-12,15,21,27-31H,13-14,16-19H2,1-10H3,(H,40,41)/b20-11+/t21-,27+,28-,29?,30-,31-,34+,35+,36+/m0/s1	OCLVBEOPEKEKNM-JULLMSSDSA-N	Organic compounds	Lipids and lipid-like molecules	Prenol lipids	Triterpenoids
461	MSID000461	Caffeic acid	CID_689043	C9H8O4	OC(=O)/C=C/c1ccc(c(c1)O)O	InChI=1S/C9H8O4/c10-7-3-1-6(5-8(7)11)2-4-9(12)13/h1-5,10-11H,(H,12,13)/b4-2+	QAIPRVGONGVQAS-DUXPYHPUSA-N	Organic compounds	Phenylpropanoids and polyketides	Cinnamic acids and derivatives	Hydroxycinnamic acids and derivatives
462	MSID000462	Camphoratin A	CID_50900753	C29H44O6	CC(C(=C)CC[C@H]([C@H]1CC[C@@H]2[C@]1(C)[C@@H](O)C(=O)C1=C2[C@@H](O)C[C@@H]2[C@]1(C)CC[C@H]([C@H]2C)O)C)C(=O)O	InChI=1S/C29H44O6/c1-14(16(3)27(34)35)7-8-15(2)18-9-10-19-23-22(31)13-20-17(4)21(30)11-12-28(20,5)24(23)25(32)26(33)29(18,19)6/h15-22,26,30-31,33H,1,7-13H2,2-6H3,(H,34,35)/t15-,16?,17+,18-,19+,20+,21-,22+,26+,28+,29-/m1/s1	FNVQVQLJUASNQK-QTDSDZRTSA-N	Organic compounds	Lipids and lipid-like molecules	Steroids and steroid derivatives	Bile acids, alcohols and derivatives
463	MSID000463	Camphoratin C	CID_50900755	C29H42O6	CC(C(=C)CC[C@H]([C@H]1CC[C@@H]2[C@]1(C)CC(=O)C1=C2C(=O)C[C@@H]2[C@]1(C)CC[C@H]([C@]2(C)O)O)C)C(=O)O	InChI=1S/C29H42O6/c1-15(17(3)26(33)34)7-8-16(2)18-9-10-19-24-20(30)13-22-27(4,12-11-23(32)29(22,6)35)25(24)21(31)14-28(18,19)5/h16-19,22-23,32,35H,1,7-14H2,2-6H3,(H,33,34)/t16-,17?,18-,19+,22-,23-,27+,28-,29-/m1/s1	VQOGQXBQGQLQDY-JUVRMLKSSA-N	Organic compounds	Lipids and lipid-like molecules	Steroids and steroid derivatives	Bile acids, alcohols and derivatives
464	MSID000464	Camphoratin D	CID_50900756	C29H42O6	C=C(C(C(=O)O)C)CC[C@H]([C@H]1CC[C@@]2([C@]1(C)CC(=O)C1=C2[C@@H](O)C[C@@H]2[C@]1(C)CCC(=O)[C@H]2C)O)C	InChI=1S/C29H42O6/c1-15(17(3)26(33)34)7-8-16(2)19-9-12-29(35)25-22(31)13-20-18(4)21(30)10-11-27(20,5)24(25)23(32)14-28(19,29)6/h16-20,22,31,35H,1,7-14H2,2-6H3,(H,33,34)/t16-,17?,18+,19-,20+,22+,27+,28-,29-/m1/s1	FPSUTNLGRMMQOR-HZDNNQLKSA-N	Organic compounds	Lipids and lipid-like molecules	Steroids and steroid derivatives	Bile acids, alcohols and derivatives
465	MSID000465	Camphoratin E	CID_50900757	C30H44O5	COC(=O)C(C(=C)CC[C@H]([C@H]1CC[C@@H]2[C@]1(C)CC(=O)C1=C2C(=O)C[C@@H]2[C@]1(C)CC[C@H]([C@H]2C)O)C)C	InChI=1S/C30H44O5/c1-16(18(3)28(34)35-7)8-9-17(2)20-10-11-21-26-24(32)14-22-19(4)23(31)12-13-29(22,5)27(26)25(33)15-30(20,21)6/h17-23,31H,1,8-15H2,2-7H3/t17-,18?,19+,20-,21+,22+,23-,29+,30-/m1/s1	DVWMQGAGJCMGQF-BBIVRDCWSA-N	Organic compounds	Lipids and lipid-like molecules	Steroids and steroid derivatives	Bile acids, alcohols and derivatives
466	MSID000466	Camphoratin F	CID_50900841	C30H44O5	COC(=O)C(C(=C)CC[C@H]([C@H]1CC[C@@H]2[C@]1(C)CC(=O)C1=C2[C@@H](O)C[C@@H]2[C@]1(C)CCC(=O)[C@H]2C)C)C	InChI=1S/C30H44O5/c1-16(18(3)28(34)35-7)8-9-17(2)20-10-11-21-26-24(32)14-22-19(4)23(31)12-13-29(22,5)27(26)25(33)15-30(20,21)6/h17-22,24,32H,1,8-15H2,2-7H3/t17-,18?,19+,20-,21+,22+,24+,29+,30-/m1/s1	KREJDSDDOCJSGN-VFJZLOOJSA-N	Organic compounds	Lipids and lipid-like molecules	Steroids and steroid derivatives	Bile acids, alcohols and derivatives
467	MSID000467	Camphoratin H	CID_50900843	C29H44O2	C=C(C(C)C)CC[C@H]([C@H]1CC[C@@H]2[C@]1(C)CC(=O)C1=C2CC[C@@H]2[C@]1(C)CCC(=O)[C@H]2C)C	InChI=1S/C29H44O2/c1-17(2)18(3)8-9-19(4)22-12-13-24-21-10-11-23-20(5)25(30)14-15-28(23,6)27(21)26(31)16-29(22,24)7/h17,19-20,22-24H,3,8-16H2,1-2,4-7H3/t19-,20+,22-,23+,24+,28+,29-/m1/s1	AYSIOTAFSDKQCL-TVLOBTIESA-N	Organic compounds	Lipids and lipid-like molecules	Steroids and steroid derivatives	Ergostane steroids
[truncated: 1,363 more rows]

## Sheet: Table S6
Table S6. The table gives the physicochemical properties namely, Molecular Weight (g/mol), Exact Molecular Weight (g/mol), LogP, Molar Refractivity, Topological Polar Surface Area (Å2), Number of Hydrogen Bond Donors, Number of Hydrogen Bond Acceptors, Number of Chiral Carbons, Number of Carbon Atoms, Number of sp Hybridized Carbon Atoms, Number of sp2 Hybridized Carbon Atoms, Number of sp3 Hybri…
[truncated: 1,831 more rows]

[truncated: 4 more sheets: Table S7, Table S8, Table S9, Table S10]
